# Supplementary material for: A fluoro-alkene mimic of Gly-trans-Pro produces a stable collagen triple helix
Source: Royal Society of Chemistry journal article supplement (doi:10.1039/d3ob00110e), 2023-01-01

## Supplementary Information

### A (Z)-Fluoro-Alkene Mimic of Gly-*trans*-Pro Produces a Stable Collagen Triple Helix

Paul J. Arcoria, Felicia A. Etzkorn\*

Department of Chemistry, Virginia Tech, Blacksburg VA, 24061, United States

\*Email: [fetzkorn@vt.edu](mailto:fetzkorn@vt.edu)

## Table of Contents

|                                                                                                                |          |
|----------------------------------------------------------------------------------------------------------------|----------|
| Figure S1.....                                                                                                 | 2        |
| Figure S2.....                                                                                                 | 3        |
| <b>Table S1. ....</b>                                                                                          | <b>4</b> |
| Figure S3.....                                                                                                 | 4        |
| Figure S4.....                                                                                                 | 5        |
| <b>Data for four-parameter Hill equation fitting of <math>T_m</math> for fluoro-alkene peptide 2-(R,Z) ...</b> | <b>6</b> |
| <b>Data for four-parameter Hill equation fitting of <math>T_m</math> for control peptide 3 .....</b>           | <b>8</b> |

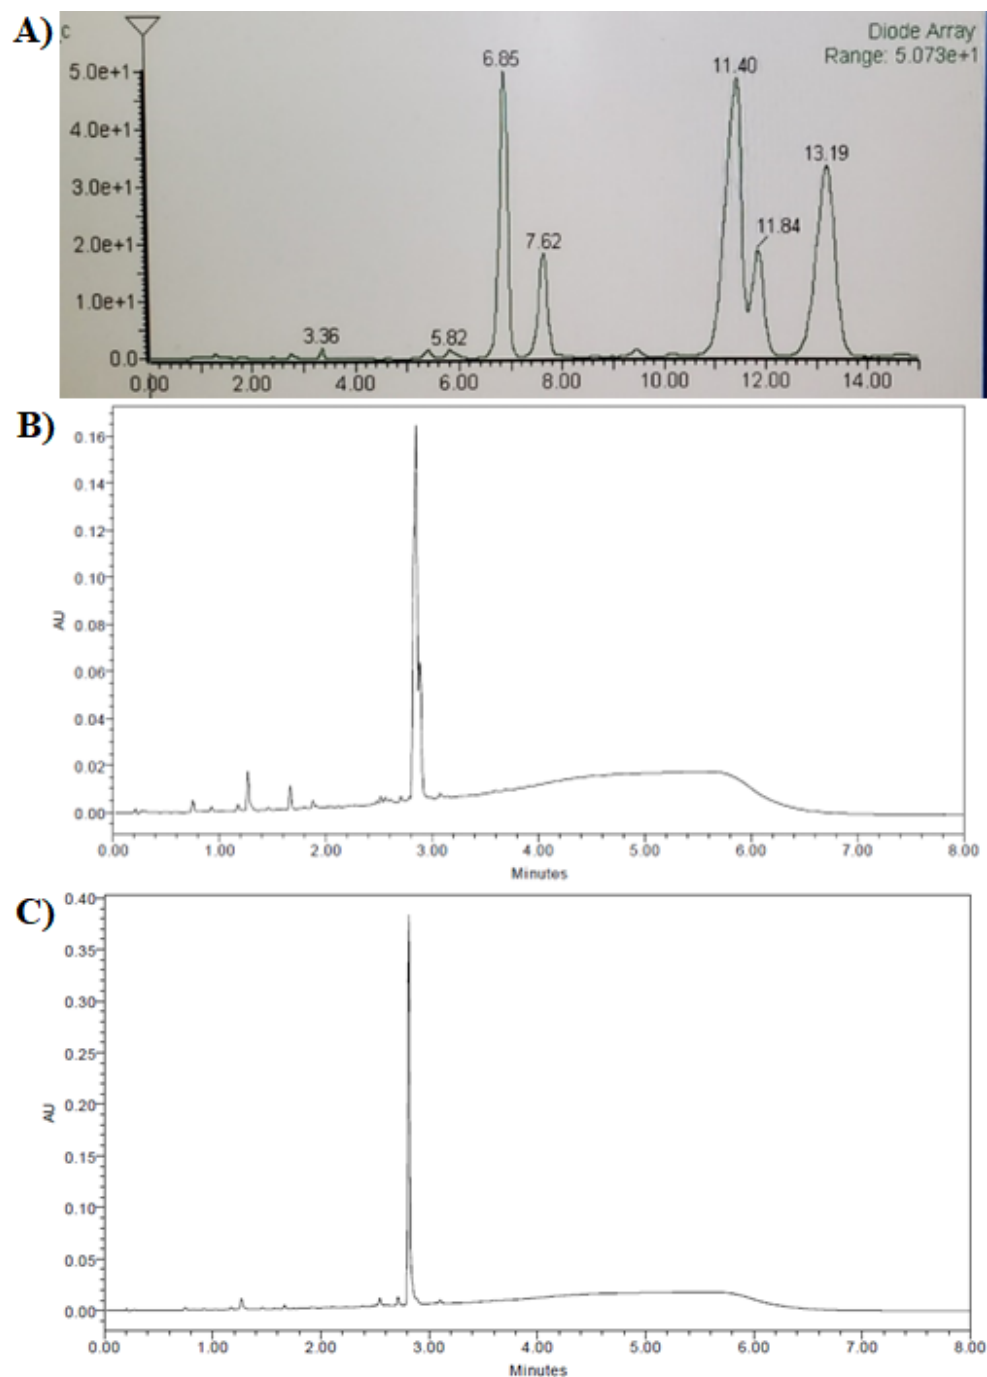

**Figure S1.**

HPLC chromatograph of benzyl ester **13-(Z)** for separation of diastereomers. A) The mixture of diastereomers. The peaks at 11.40 min and 11.84 min correspond to the two rotamers of the diastereomer **13-(S,Z)**. The peak at 13.19 min corresponds to the diastereomer **13-(R,Z)** (rotamer separation not observed). B) UPLC chromatograph of the separated diastereomer **13-(S,Z)**. C) UPLC chromatograph of the separated diastereomer **13-(R,Z)**.

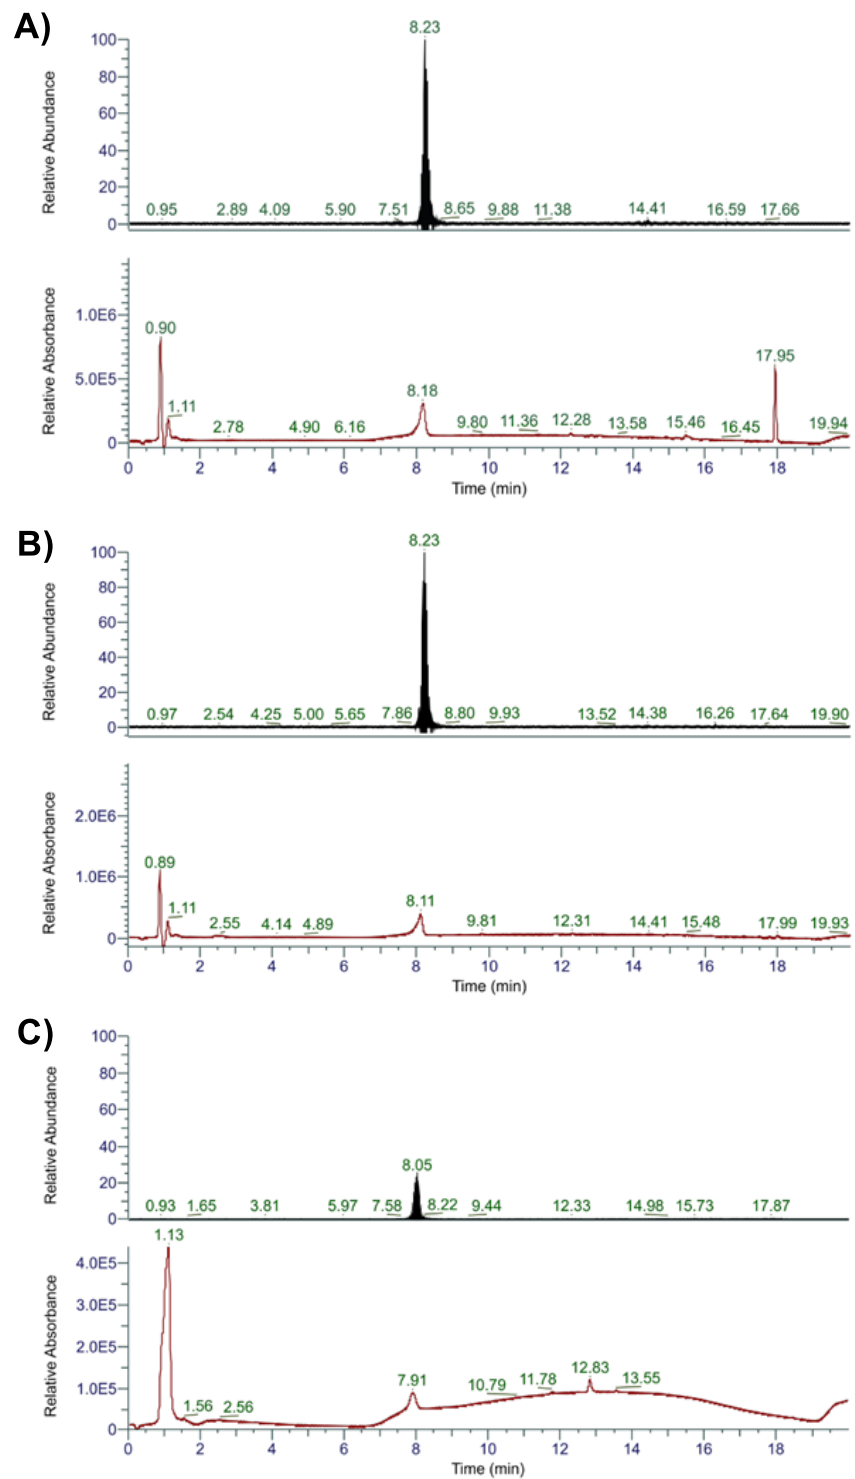

**Figure S2.**

LC-MS chromatograms showing total ion count and UV absorption at 280 nm of A) 2-(*R,Z*), B)

2-(*S,Z*) and C) control 3.

**Table S1.** MALDI-TOF results of peptides **2-(R,Z)**, **2-(S,Z)**, and **3**.

|                | [M + H] <sup>+</sup> |           | [M + Na] <sup>+</sup> |           | [M + K] <sup>+</sup> |           |
|----------------|----------------------|-----------|-----------------------|-----------|----------------------|-----------|
|                | Calcd <sup>a</sup>   | Found     | Calcd <sup>a</sup>    | Found     | Calcd <sup>a</sup>   | Found     |
| <b>2-(R,Z)</b> | 2474.1190            | N.D.      | 2497.1088             | 2497.0881 | 2513.0827            | 2514.0687 |
| <b>2-(S,Z)</b> | 2474.1190            | 2475.1099 | 2497.1088             | 2497.0918 | 2513.0827            | 2513.0670 |
| <b>3</b>       | 2474.1259            | 2474.1081 | 2496.1084             | 2496.0927 | 2512.0823            | 2512.0674 |

<sup>a</sup>Calcd mass for the most abundant isotopes. N.D. = not detected.

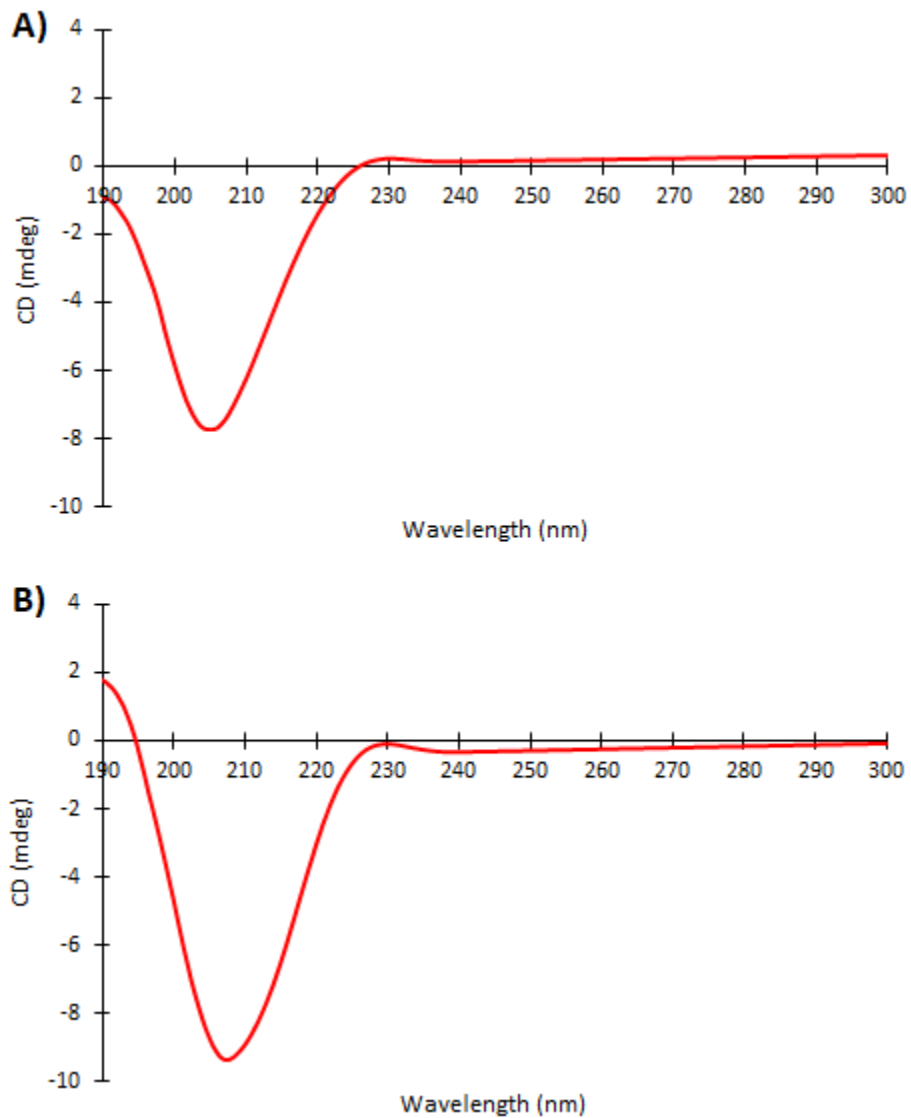

**Figure S3.** Full-range CD spectra at 85 °C of **A)** peptide **2-(R,Z)** and **B)** control **3**.

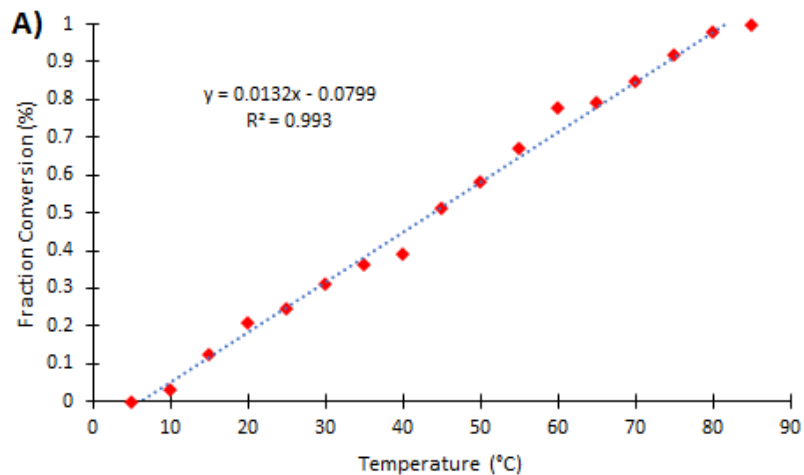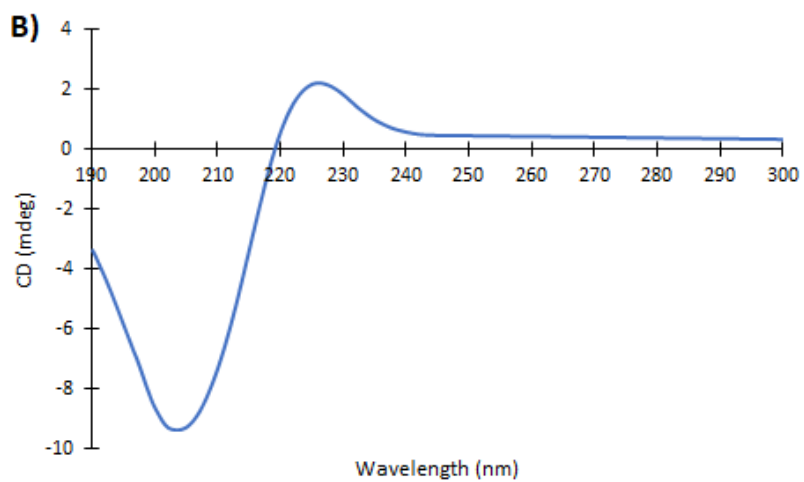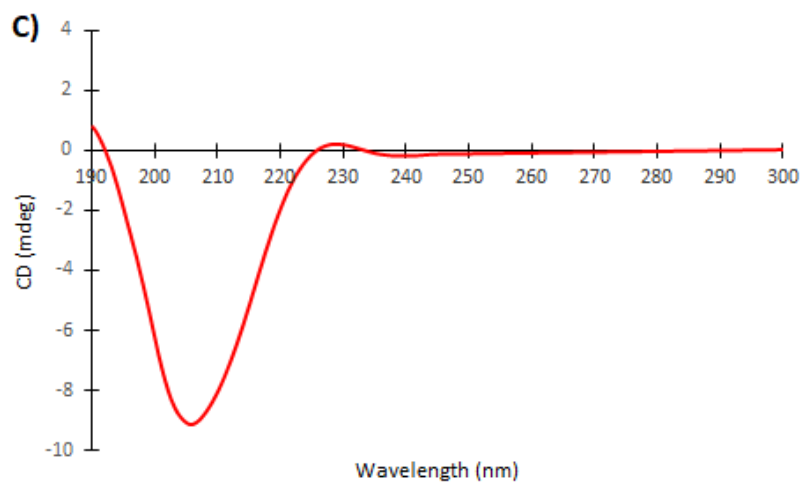

**Figure S4.** **A)** linear thermal melting curve of fluoro-alkene peptide **2-(S,Z)**, **B)** Full-range CD spectrum of peptide **2-(S,Z)** at 5 °C and **C)** Full-range CD spectrum of peptide **2-(S,Z)** at 85 °C.

## Data for four-parameter Hill equation fitting of $T_m$ for fluoro-alkene peptide 2-(R,Z)

### Nonlinear Regression

Data Source: Data 1 in Notebook1

Equation: Sigmoidal, Sigmoid, 4 Parameter

$$f = y_0 + a / (1 + \exp(-(x - x_0)/b))$$

|          |             |                 |                                   |
|----------|-------------|-----------------|-----------------------------------|
| <b>R</b> | <b>Rsqr</b> | <b>Adj Rsqr</b> | <b>Standard Error of Estimate</b> |
| 0.9993   | 0.9986      | 0.9982          | 0.0173                            |

|    | <b>Coefficient</b> | <b>Std. Error</b> | <b>t</b> | <b>P</b> | <b>VIF</b> |
|----|--------------------|-------------------|----------|----------|------------|
| a  | 1.0539             | 0.0202            | 52.1638  | <0.0001  | 9.8801<    |
| b  | 9.0676             | 0.4366            | 20.7676  | <0.0001  | 3.3070     |
| x0 | 42.2261            | 0.4427            | 95.3859  | <0.0001  | 2.6643     |
| y0 | -0.0261            | 0.0133            | -1.9650  | 0.0712   | 9.9823<    |

### Analysis of Variance:

Uncorrected for the mean of the observations:

|            | <b>DF</b> | <b>SS</b> | <b>MS</b> |
|------------|-----------|-----------|-----------|
| Regression | 4         | 7.5839    | 1.8960    |
| Residual   | 13        | 0.0039    | 0.0003    |
| Total      | 17        | 7.5878    | 0.4463    |

Corrected for the mean of the observations:

|            | <b>DF</b> | <b>SS</b> | <b>MS</b> | <b>F</b>  | <b>P</b> |
|------------|-----------|-----------|-----------|-----------|----------|
| Regression | 3         | 2.7248    | 0.9083    | 3025.9605 | <0.0001  |
| Residual   | 13        | 0.0039    | 0.0003    |           |          |
| Total      | 16        | 2.7287    | 0.1705    |           |          |

### Statistical Tests:

**PRESS** 0.0066

**Durbin-Watson Statistic** 0.8654 Failed

**Normality Test** Passed (P = 0.9602)

K-S Statistic = 0.1184 Significance Level = 0.9602

**Constant Variance Test** Passed (P = 0.1600)

**Power of performed test with alpha = 0.0500: 1.0000**

### Regression Diagnostics:

| <b>Row</b> | <b>Std. Res.</b> | <b>Stud. Res.</b> | <b>Stud. Del. Res.</b> |
|------------|------------------|-------------------|------------------------|
| 2          | 0.5193           | 0.6509            | 0.6358                 |
| 3          | 0.1085           | 0.1280            | 0.1230                 |
| 4          | -0.2300          | -0.2579           | -0.2485                |
| 5          | -1.1969          | -1.3089           | -1.3496                |
| 6          | -0.2054          | -0.2278           | -0.2193                |

|    |         |         |         |
|----|---------|---------|---------|
| 7  | 0.6546  | 0.7572  | 0.7441  |
| 8  | 0.9849  | 1.1623  | 1.1797  |
| 9  | 0.4900  | 0.5666  | 0.5512  |
| 10 | -0.7653 | -0.8818 | -0.8738 |
| 11 | -1.5080 | -1.7691 | -1.9506 |
| 12 | -0.4225 | -0.4878 | -0.4730 |
| 13 | 1.0814  | 1.1977  | 1.2199  |
| 14 | 1.4663  | 1.5861  | 1.6969  |
| 15 | 1.0834  | 1.1797  | 1.1995  |
| 16 | -0.0556 | -0.0622 | -0.0597 |
| 17 | -0.9384 | -1.0864 | -1.0947 |
| 18 | -1.0664 | -1.2756 | -1.3103 |

**Influence Diagnostics:**

| Row | Cook's Dist | Leverage | DFFITS  |
|-----|-------------|----------|---------|
| 2   | 0.0605      | 0.3635   | 0.4804  |
| 3   | 0.0016      | 0.2818   | 0.0771  |
| 4   | 0.0043      | 0.2047   | -0.1260 |
| 5   | 0.0839      | 0.1638   | -0.5973 |
| 6   | 0.0030      | 0.1869   | -0.1051 |
| 7   | 0.0484      | 0.2526   | 0.4326  |
| 8   | 0.1327      | 0.2820   | 0.7394  |
| 9   | 0.0270      | 0.2520   | 0.3199  |
| 10  | 0.0637      | 0.2467   | -0.5001 |
| 11  | 0.2943      | 0.2734   | -1.1964 |
| 12  | 0.0198      | 0.2499   | -0.2730 |
| 13  | 0.0812      | 0.1847   | 0.5806  |
| 14  | 0.1069      | 0.1453   | 0.6997  |
| 15  | 0.0646      | 0.1567   | 0.5170  |
| 16  | 0.0002      | 0.2010   | -0.0300 |
| 17  | 0.1005      | 0.2540   | -0.6388 |
| 18  | 0.1753      | 0.3011   | -0.8600 |

**95% Confidence:**

| Row | Predicted | 95% Conf-L | 95% Conf-U | 95% Pred-L | 95% Pred-U |
|-----|-----------|------------|------------|------------|------------|
| 2   | -0.0090   | -0.0316    | 0.0136     | -0.0527    | 0.0347     |
| 3   | 0.0032    | -0.0166    | 0.0231     | -0.0391    | 0.0456     |
| 4   | 0.0238    | 0.0068     | 0.0407     | -0.0173    | 0.0649     |
| 5   | 0.0575    | 0.0424     | 0.0727     | 0.0172     | 0.0979     |
| 6   | 0.1111    | 0.0949     | 0.1272     | 0.0703     | 0.1518     |
| 7   | 0.1912    | 0.1724     | 0.2100     | 0.1493     | 0.2331     |
| 8   | 0.3013    | 0.2815     | 0.3212     | 0.2590     | 0.3437     |
| 9   | 0.4365    | 0.4177     | 0.4553     | 0.3946     | 0.4784     |
| 10  | 0.5808    | 0.5622     | 0.5994     | 0.5390     | 0.6226     |
| 11  | 0.7139    | 0.6943     | 0.7334     | 0.6716     | 0.7561     |
| 12  | 0.8208    | 0.8021     | 0.8395     | 0.7789     | 0.8626     |
| 13  | 0.8977    | 0.8816     | 0.9138     | 0.8570     | 0.9384     |
| 14  | 0.9487    | 0.9344     | 0.9630     | 0.9087     | 0.9888     |
| 15  | 0.9807    | 0.9659     | 0.9956     | 0.9405     | 1.0210     |
| 16  | 1.0002    | 0.9834     | 1.0170     | 0.9592     | 1.0412     |
| 17  | 1.0117    | 0.9928     | 1.0306     | 0.9698     | 1.0536     |
| 18  | 1.0185    | 0.9979     | 1.0390     | 0.9758     | 1.0612     |

**Fit Equation Description:**

[Variables]

x = col(1)

```

y = col(3)
reciprocal_y = 1/abs(y)
reciprocal_ysquare = 1/y^2
[Parameters]
a = max(y)-min(y) "Auto" {{previous: 1.0539}}
b = xwtr(x,y-min(y),.5)/4 "Auto" {{previous: 9.06758}}
x0 = x50(x,y-min(y),.5) "Auto" {{previous: 42.2261}}
y0 = min(y) "Auto" {{previous: -0.0260873}}
[Equation]
f= y0+a/(1+exp(-(x-x0)/b))
fit f to y
"fit f to y with weight reciprocal_y
"fit f to y with weight reciprocal_ysquare
[Constraints]
[Options]
tolerance=1e-10
stepsize=1
iterations=200

```

Number of Iterations Performed = 9

### Data for four-parameter Hill equation fitting of $T_m$ for control peptide 3

#### Nonlinear Regression

Data Source: Data 1 in Notebook1

Equation: Sigmoidal, Sigmoid, 4 Parameter

$f = y_0 + a / (1 + \exp(-(x - x_0) / b))$

**R**      **Rsq**    **Adj Rsqr**      **Standard Error of Estimate**

0.9994   0.9987   0.9984      0.0158

|    | <b>Coefficient</b> | <b>Std. Error</b> | <b>t</b> | <b>P</b> | <b>VIF</b> |
|----|--------------------|-------------------|----------|----------|------------|
| a  | 1.0958             | 0.0253            | 43.2320  | <0.0001  | 14.7409<   |
| b  | 11.1588            | 0.5468            | 20.4063  | <0.0001  | 5.3052<    |
| x0 | 48.3899            | 0.5132            | 94.2895  | <0.0001  | 3.7774     |
| y0 | -0.0434            | 0.0129            | -3.3716  | 0.0050   | 11.2828<   |

#### Analysis of Variance:

Uncorrected for the mean of the observations:

|            | <b>DF</b> | <b>SS</b> | <b>MS</b> |
|------------|-----------|-----------|-----------|
| Regression | 4         | 6.1540    | 1.5385    |
| Residual   | 13        | 0.0032    | 0.0002    |
| Total      | 17        | 6.1572    | 0.3622    |

Corrected for the mean of the observations:

|            | <b>DF</b> | <b>SS</b> | <b>MS</b> | <b>F</b>  | <b>P</b> |
|------------|-----------|-----------|-----------|-----------|----------|
| Regression | 3         | 2.5140    | 0.8380    | 3361.5246 | <0.0001  |
| Residual   | 13        | 0.0032    | 0.0002    |           |          |
| Total      | 16        | 2.5173    | 0.1573    |           |          |

#### Statistical Tests:



**PRESS** 0.0058

**Durbin-Watson Statistic** 1.0081 Failed

**Normality Test** Passed (P = 0.5103)

K-S Statistic = 0.1923 Significance Level = 0.5103

**Constant Variance Test** Passed (P = 0.4314)

**Power of performed test with alpha = 0.0500: 1.0000**

**Regression Diagnostics:**

| Row | Std. Res. | Stud. Res. | Stud. Del. Res. |
|-----|-----------|------------|-----------------|
| 2   | 1.3540    | 1.6803     | 1.8246          |
| 3   | 0.6190    | 0.7244     | 0.7105          |
| 4   | -0.5299   | -0.5914    | -0.5760         |
| 5   | -1.6408   | -1.7823    | -1.9698         |
| 6   | -0.7299   | -0.7931    | -0.7811         |
| 7   | -0.5955   | -0.6632    | -0.6483         |
| 8   | 0.5107    | 0.5843     | 0.5689          |
| 9   | 1.8018    | 2.0645<    | 2.4194<         |
| 10  | 0.4401    | 0.4963     | 0.4815          |
| 11  | -0.7379   | -0.8340    | -0.8236         |
| 12  | -0.6542   | -0.7543    | -0.7411         |
| 13  | -0.7328   | -0.8442    | -0.8343         |
| 14  | 0.2685    | 0.3005     | 0.2897          |
| 15  | 0.2626    | 0.2880     | 0.2776          |
| 16  | 0.9319    | 1.0401     | 1.0437          |
| 17  | 0.2367    | 0.2813     | 0.2711          |
| 18  | -0.8043   | -1.0603    | -1.0659         |

**Influence Diagnostics:**

| Row | Cook's Dist | Leverage | DFFITs  |
|-----|-------------|----------|---------|
| 2   | 0.3811      | 0.3506   | 1.3407  |
| 3   | 0.0485      | 0.2697   | 0.4318  |
| 4   | 0.0214      | 0.1970   | -0.2853 |
| 5   | 0.1428      | 0.1525   | -0.8354 |
| 6   | 0.0284      | 0.1530   | -0.3320 |
| 7   | 0.0264      | 0.1937   | -0.3177 |
| 8   | 0.0264      | 0.2361   | 0.3162  |
| 9   | 0.3335      | 0.2383   | 1.3535  |
| 10  | 0.0167      | 0.2138   | 0.2511  |
| 11  | 0.0482      | 0.2171   | -0.4338 |
| 12  | 0.0468      | 0.2477   | -0.4253 |
| 13  | 0.0583      | 0.2466   | -0.4773 |
| 14  | 0.0057      | 0.2017   | 0.1456  |
| 15  | 0.0042      | 0.1684   | 0.1249  |
| 16  | 0.0665      | 0.1973   | 0.5174  |
| 17  | 0.0082      | 0.2918   | 0.1740  |
| 18  | 0.2074      | 0.4246   | -0.9156 |

**95% Confidence:**

| Row | Predicted | 95% Conf-L | 95% Conf-U | 95% Pred-L | 95% Pred-U |
|-----|-----------|------------|------------|------------|------------|
| 2   | -0.0214   | -0.0416    | -0.0012    | -0.0610    | 0.0183     |

|    |         |         |        |         |        |
|----|---------|---------|--------|---------|--------|
| 3  | -0.0093 | -0.0271 | 0.0084 | -0.0478 | 0.0291 |
| 4  | 0.0090  | -0.0062 | 0.0241 | -0.0283 | 0.0463 |
| 5  | 0.0364  | 0.0231  | 0.0497 | -0.0002 | 0.0730 |
| 6  | 0.0766  | 0.0632  | 0.0899 | 0.0400  | 0.1132 |
| 7  | 0.1335  | 0.1185  | 0.1485 | 0.0962  | 0.1707 |
| 8  | 0.2103  | 0.1937  | 0.2269 | 0.1724  | 0.2482 |
| 9  | 0.3077  | 0.2911  | 0.3244 | 0.2698  | 0.3457 |
| 10 | 0.4219  | 0.4062  | 0.4377 | 0.3844  | 0.4595 |
| 11 | 0.5440  | 0.5281  | 0.5599 | 0.5063  | 0.5816 |
| 12 | 0.6622  | 0.6452  | 0.6792 | 0.6241  | 0.7003 |
| 13 | 0.7663  | 0.7494  | 0.7833 | 0.7283  | 0.8044 |
| 14 | 0.8506  | 0.8353  | 0.8659 | 0.8132  | 0.8880 |
| 15 | 0.9143  | 0.9003  | 0.9283 | 0.8774  | 0.9512 |
| 16 | 0.9600  | 0.9448  | 0.9751 | 0.9227  | 0.9973 |
| 17 | 0.9915  | 0.9731  | 1.0099 | 0.9527  | 1.0303 |
| 18 | 1.0127  | 0.9905  | 1.0349 | 0.9720  | 1.0534 |

### Fit Equation Description:

[Variables]

x = col(1)

y = col(2)

reciprocal\_y = 1/abs(y)

reciprocal\_ysquare = 1/y^2

[Parameters]

a = max(y)-min(y) "Auto {{previous: 1.09577}}

b = xwtr(x,y-min(y),.5)/4 "Auto {{previous: 11.1588}}

x0 = x50(x,y-min(y),.5) "Auto {{previous: 48.3899}}

y0 = min(y) "Auto {{previous: -0.0433683}}

[Equation]

$\hat{f} = y_0 + a / (1 + \exp(-(x - x_0) / b))$

fit f to y

"fit f to y with weight reciprocal\_y

"fit f to y with weight reciprocal\_ysquare

[Constraints]

[Options]

tolerance=1e-10

stepsize=1

iterations=200

Number of Iterations Performed = 9

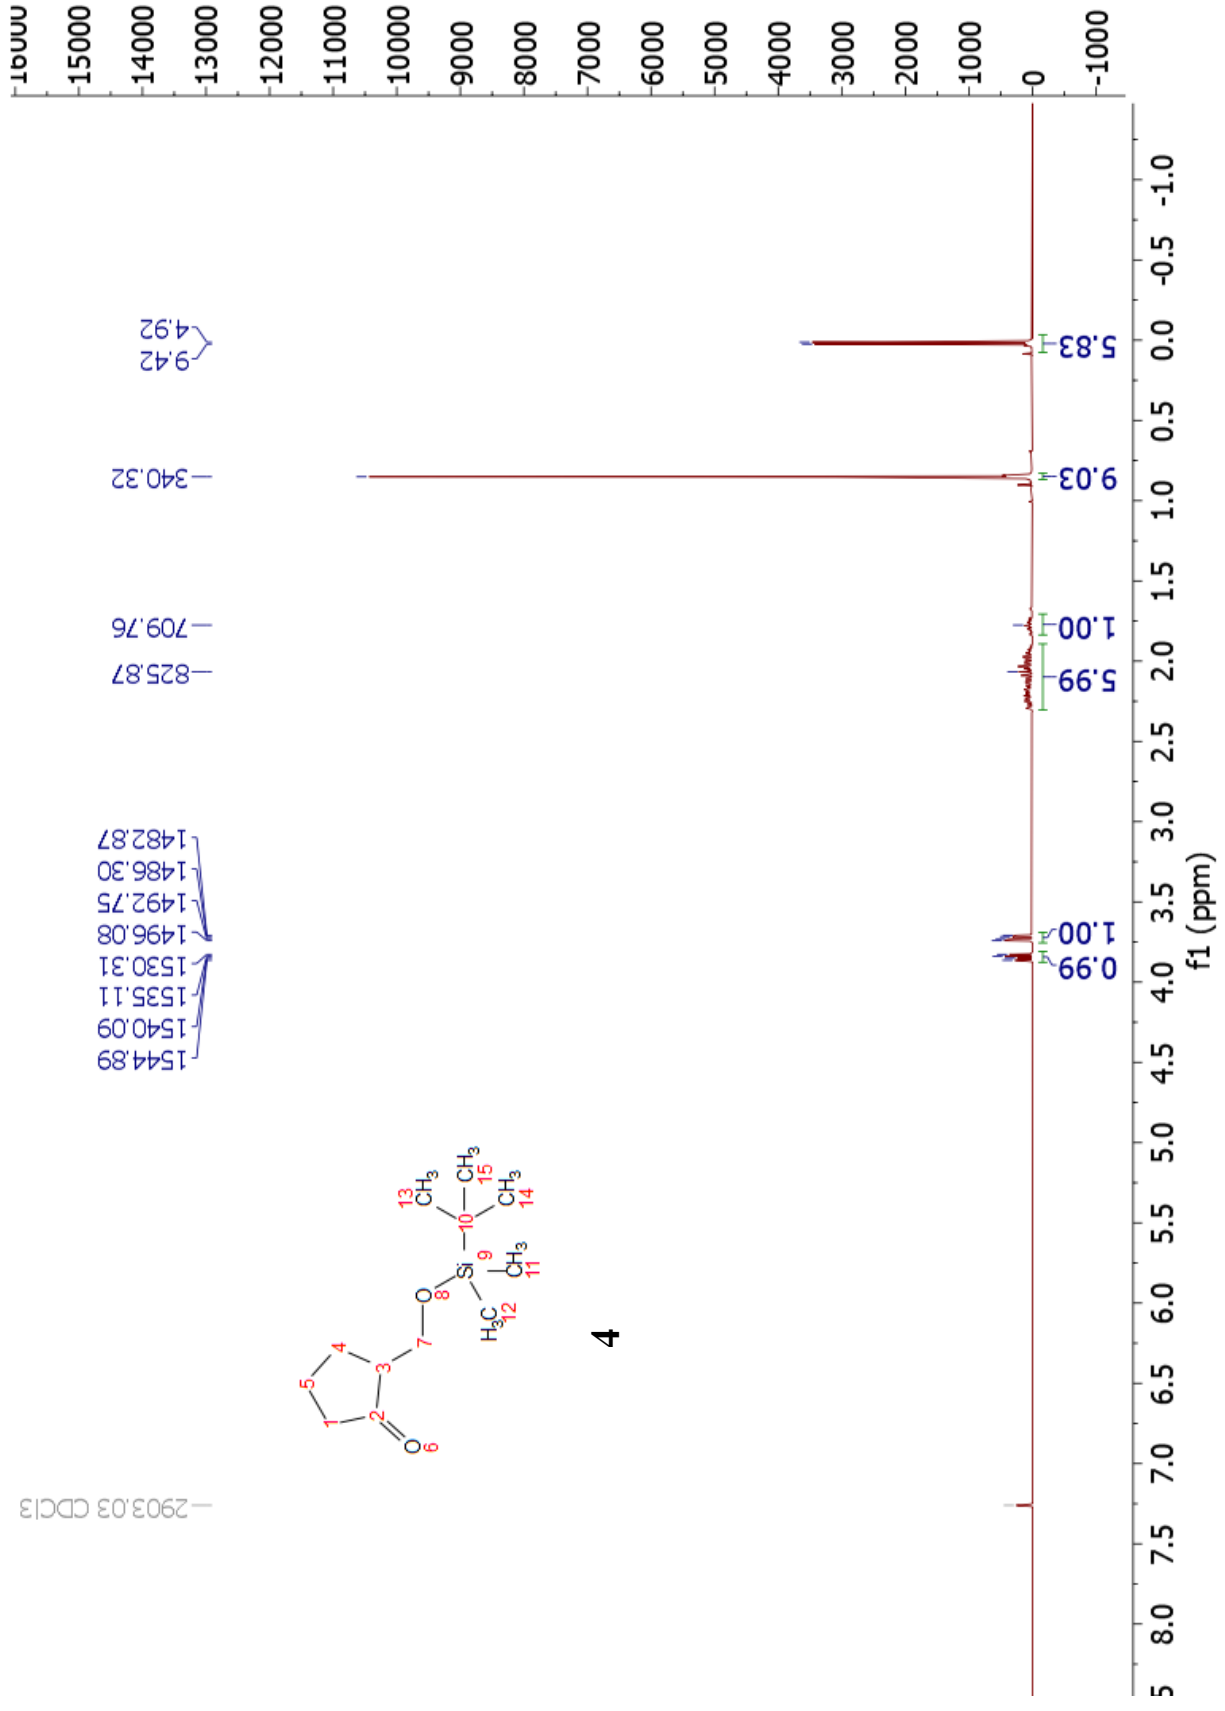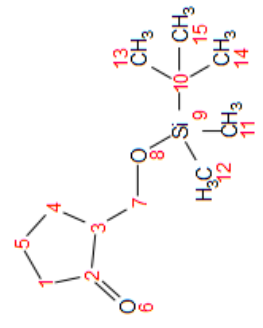

-2903.03 CDCl3

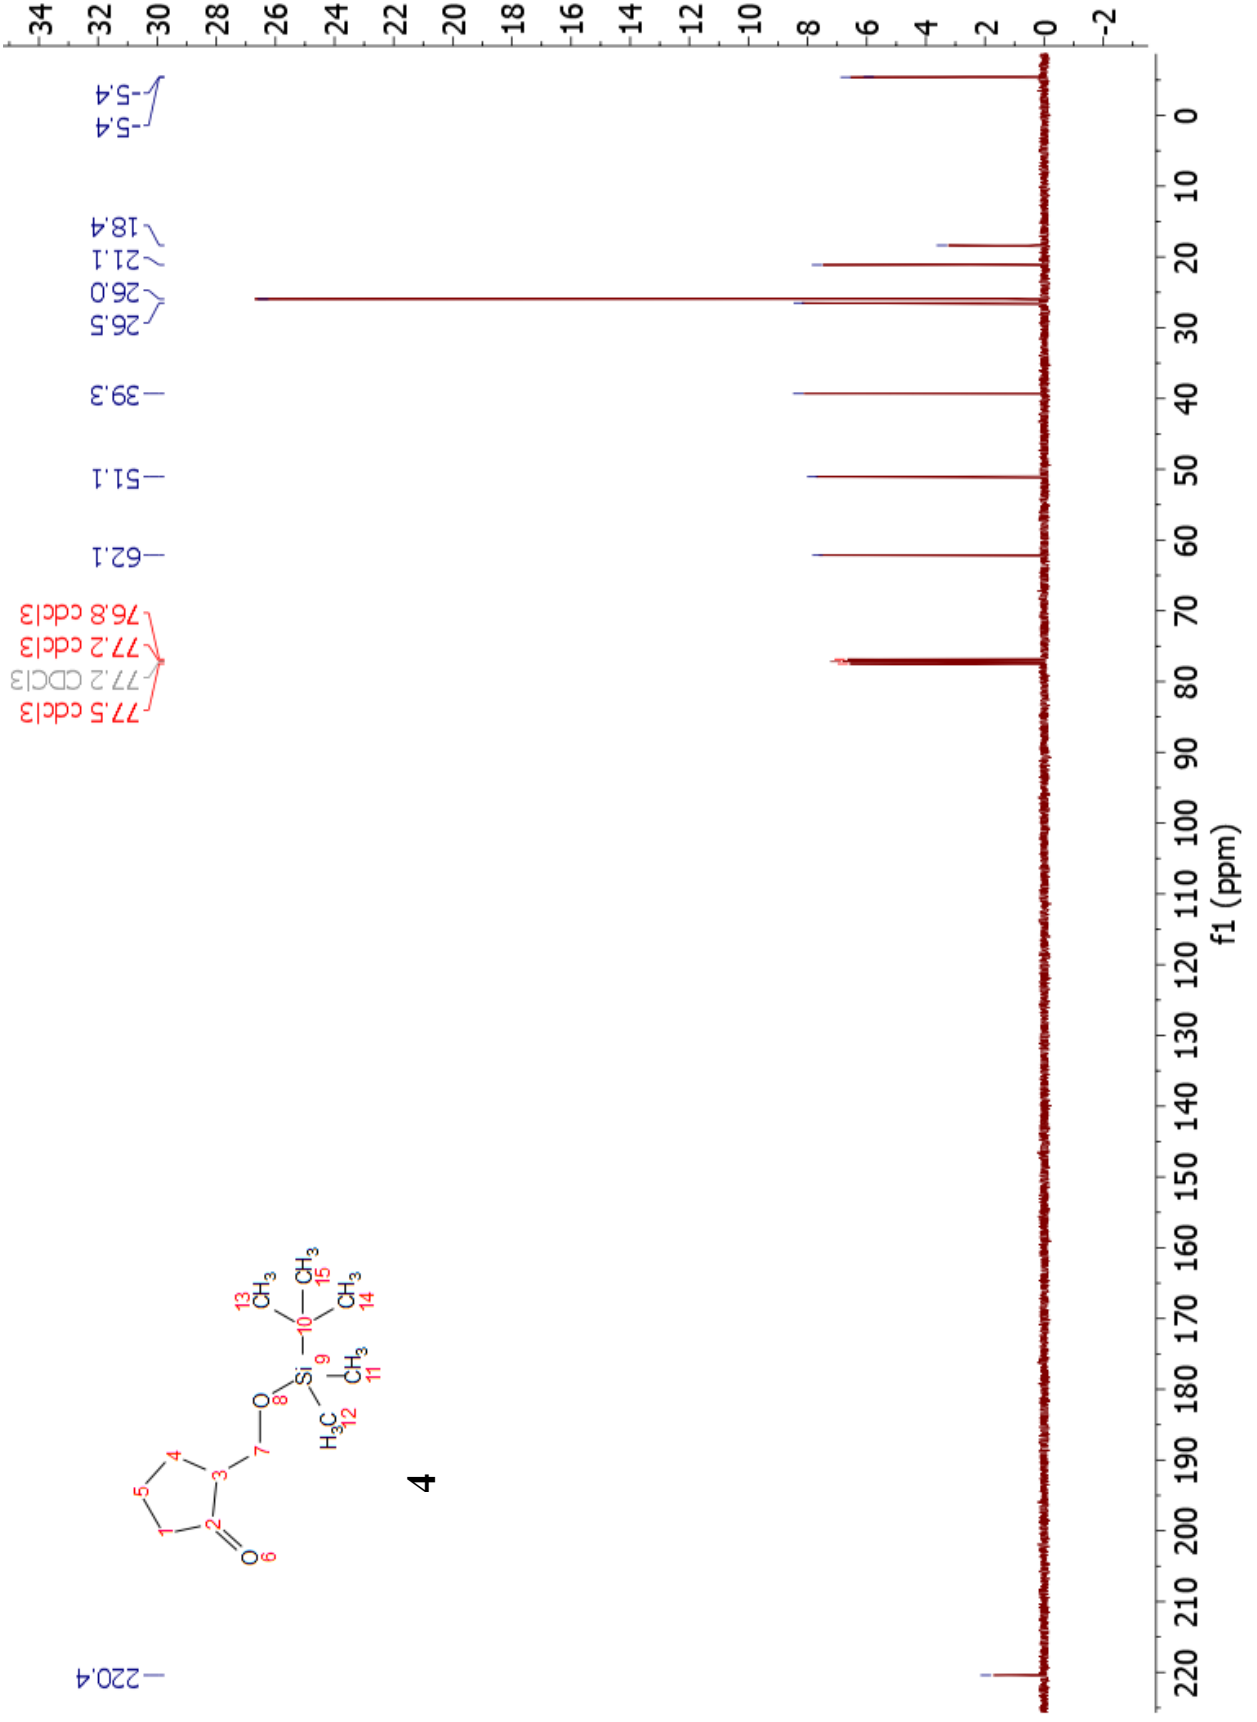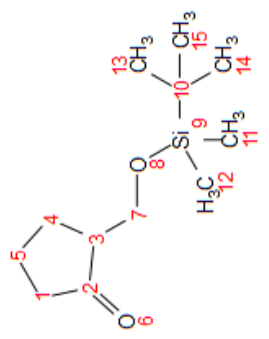

4

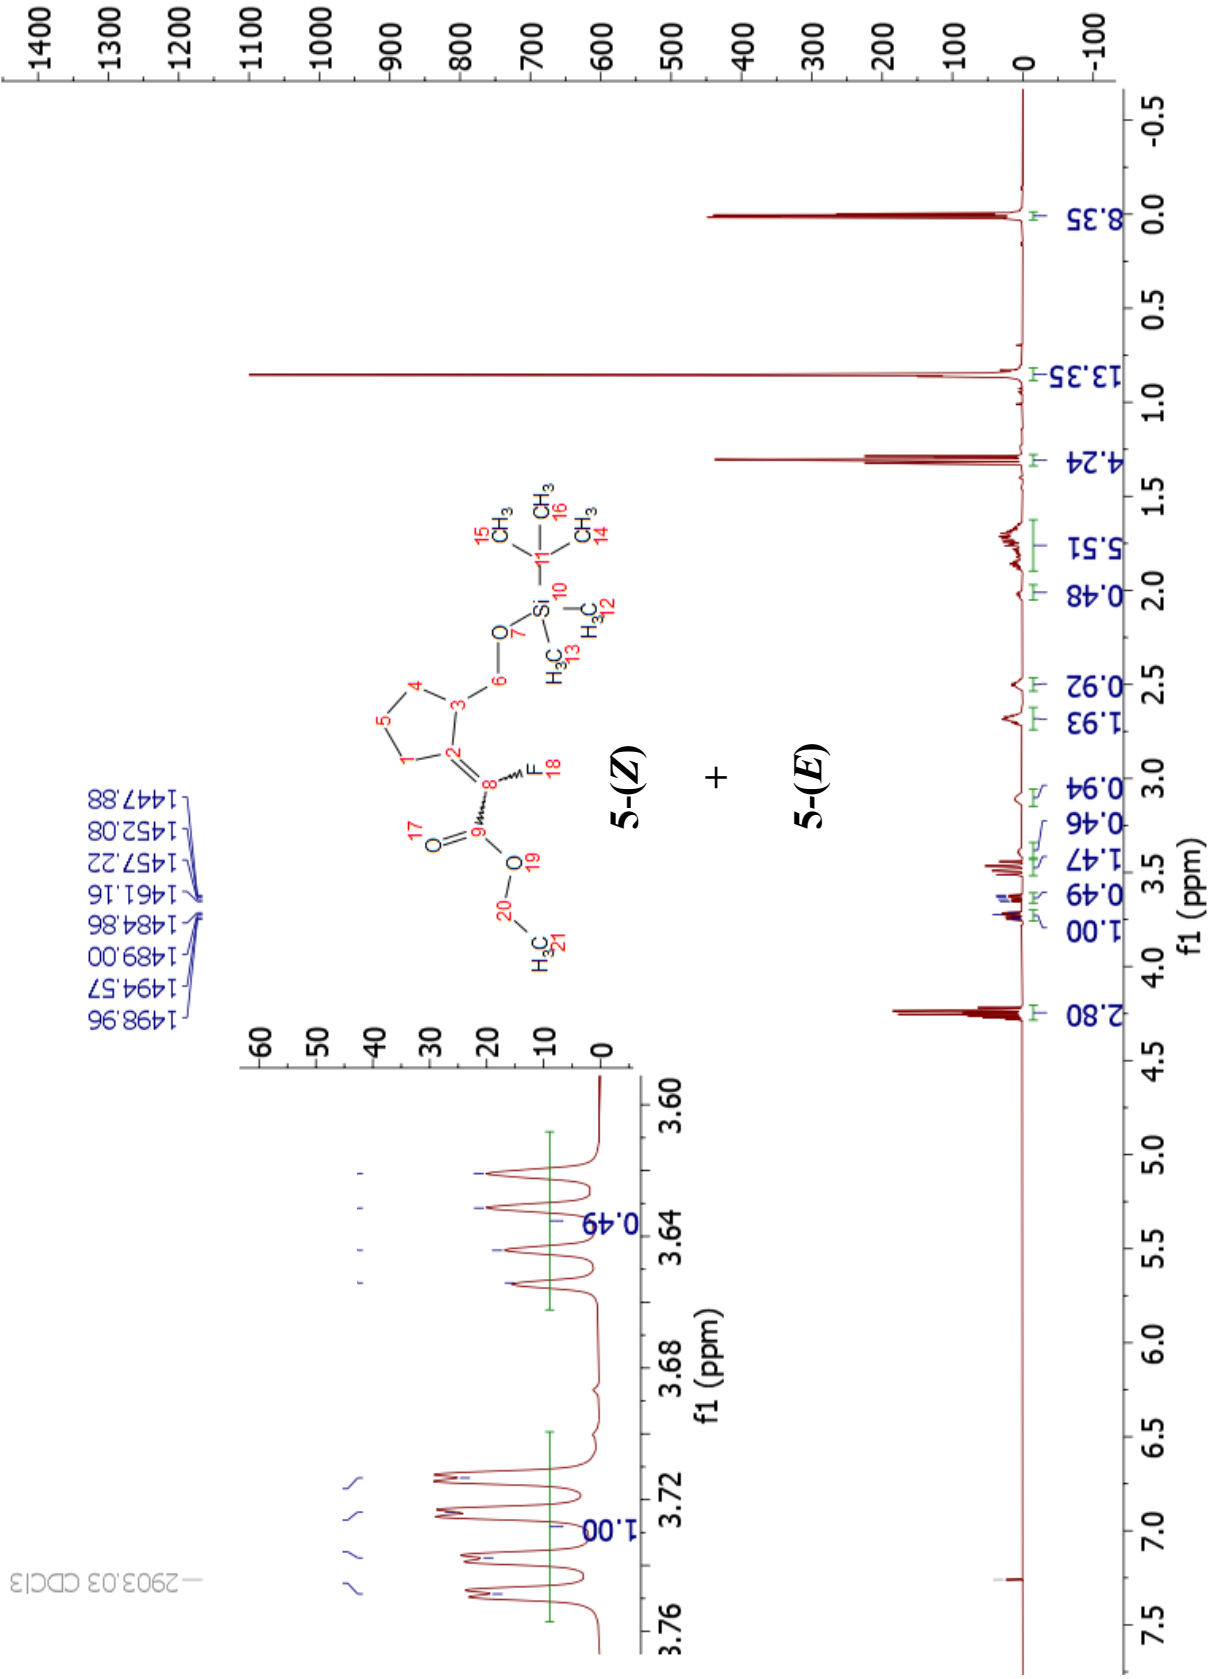

-2903.03 CDCl3

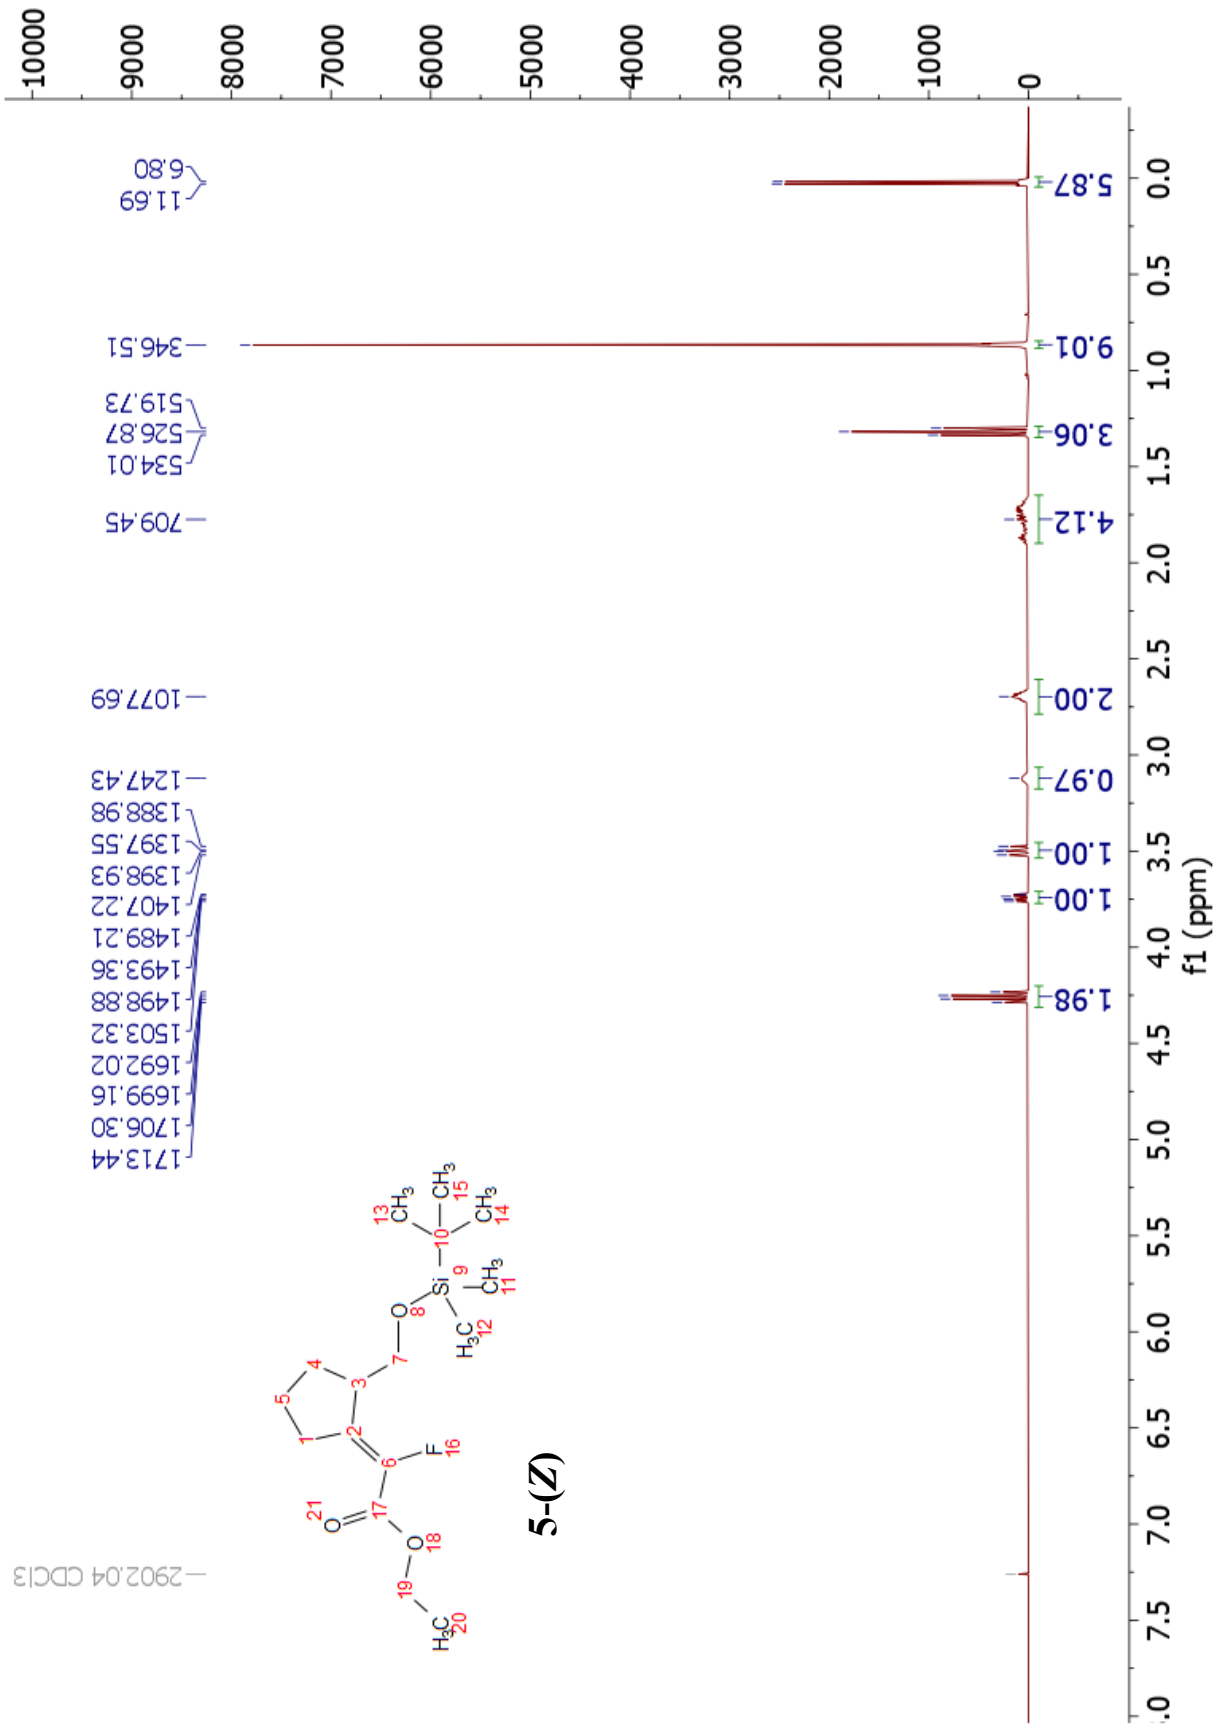

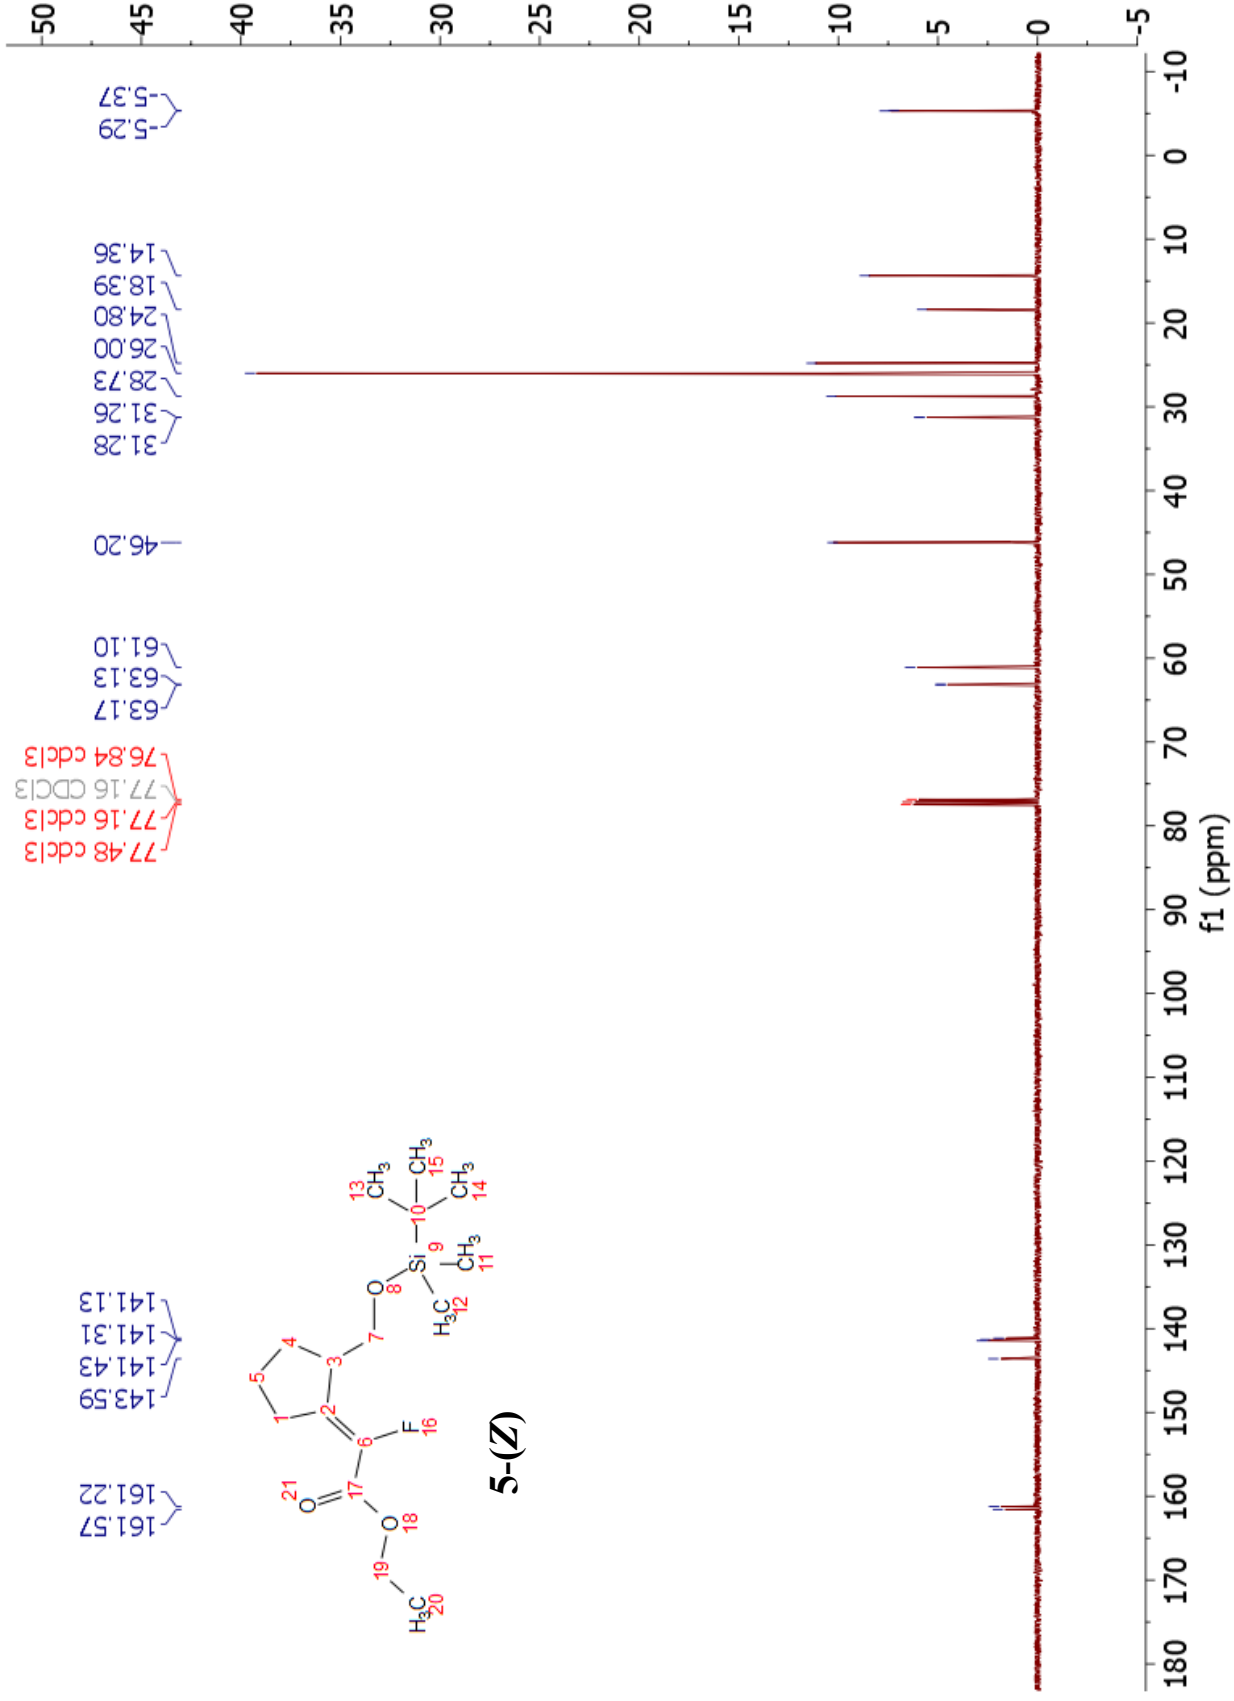

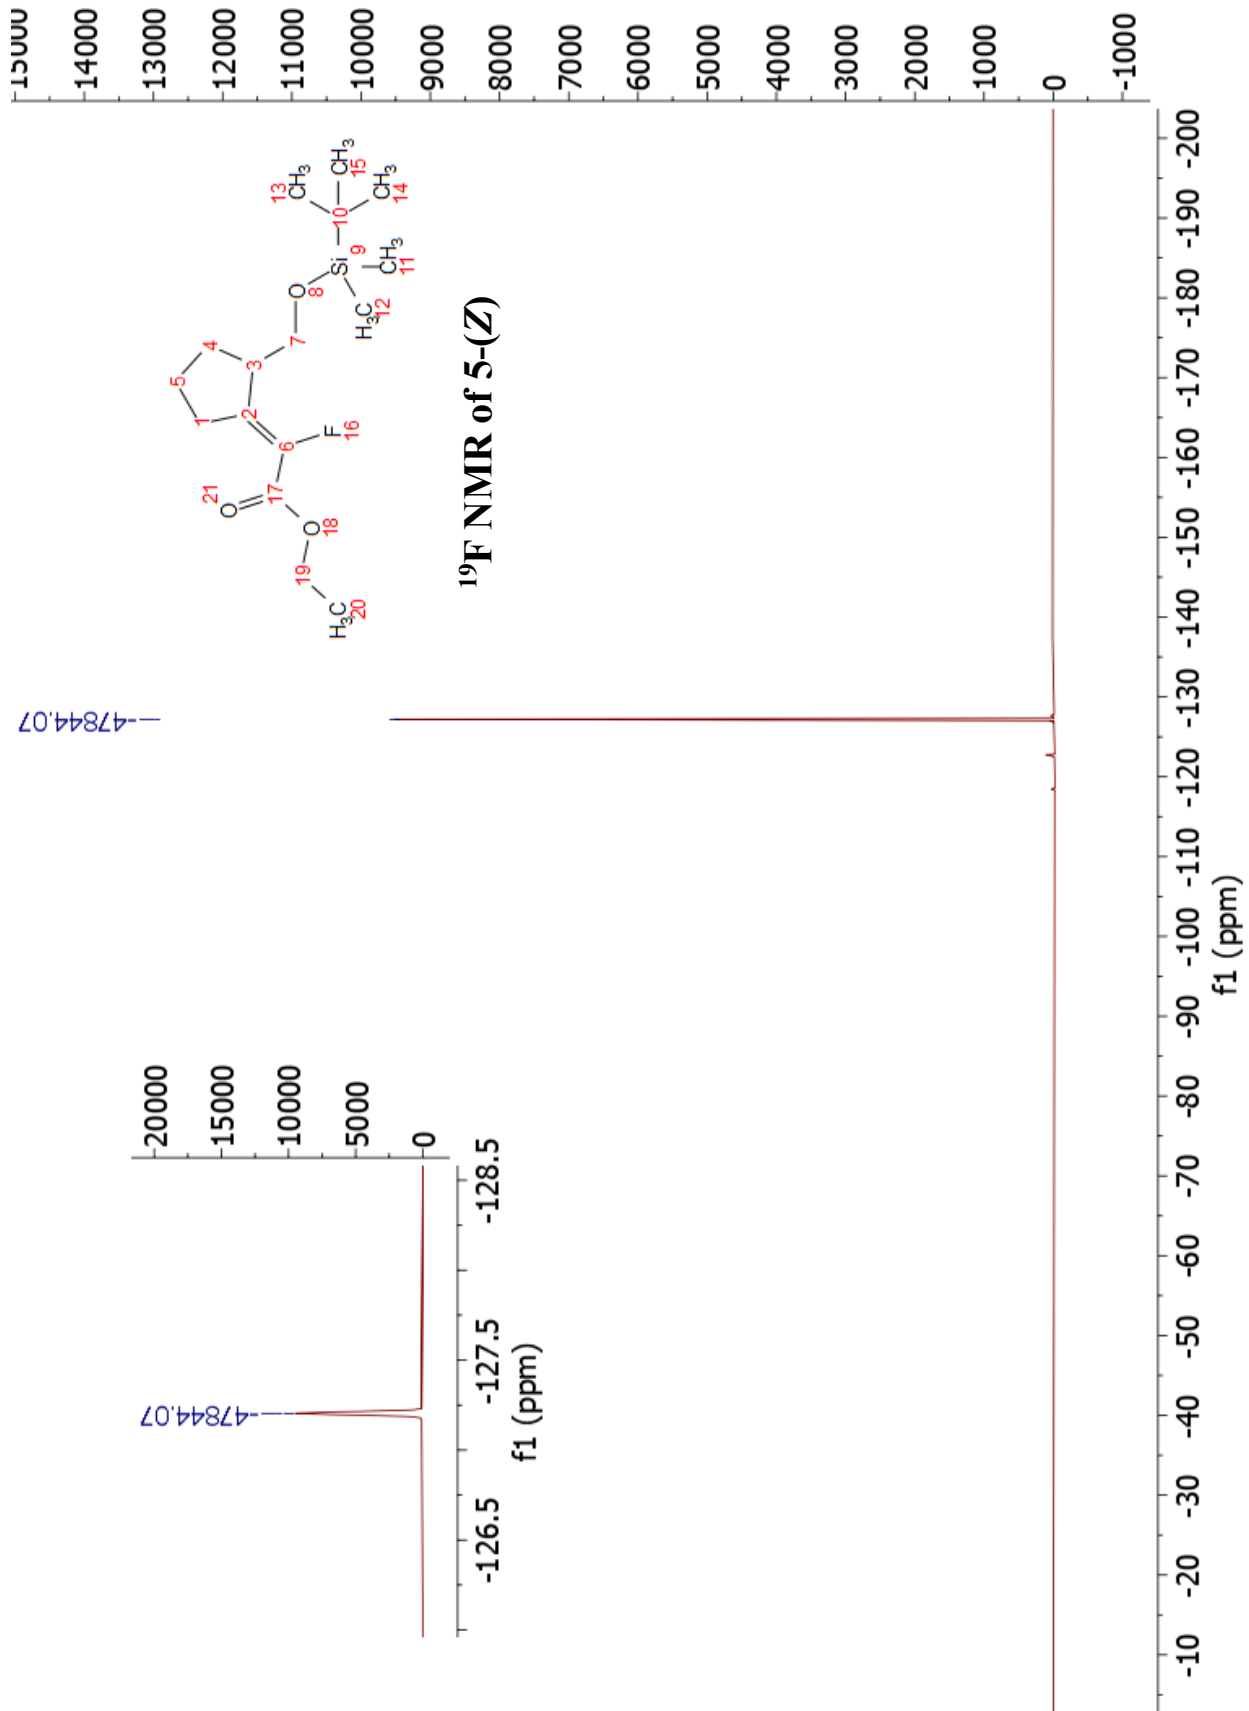



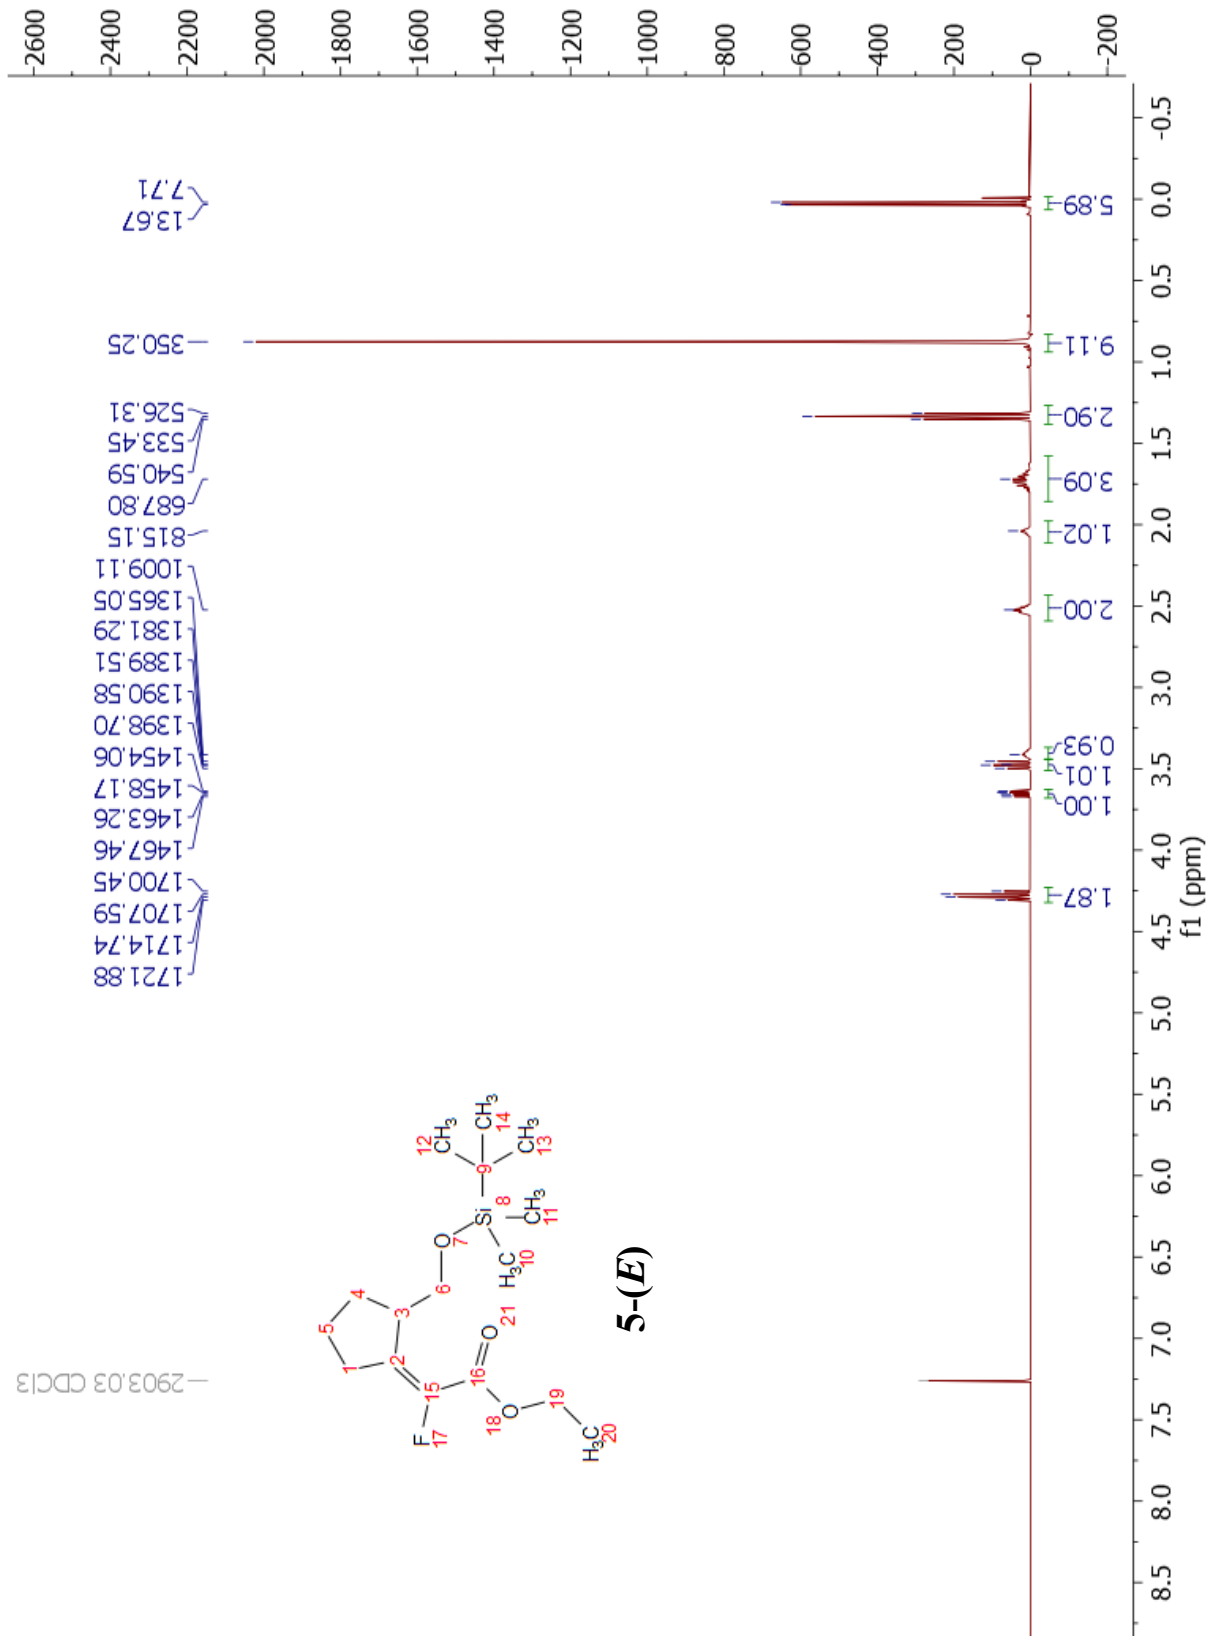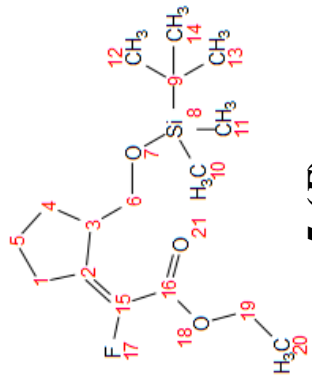

5-(E)

— 2903.03 CDCl<sub>3</sub>

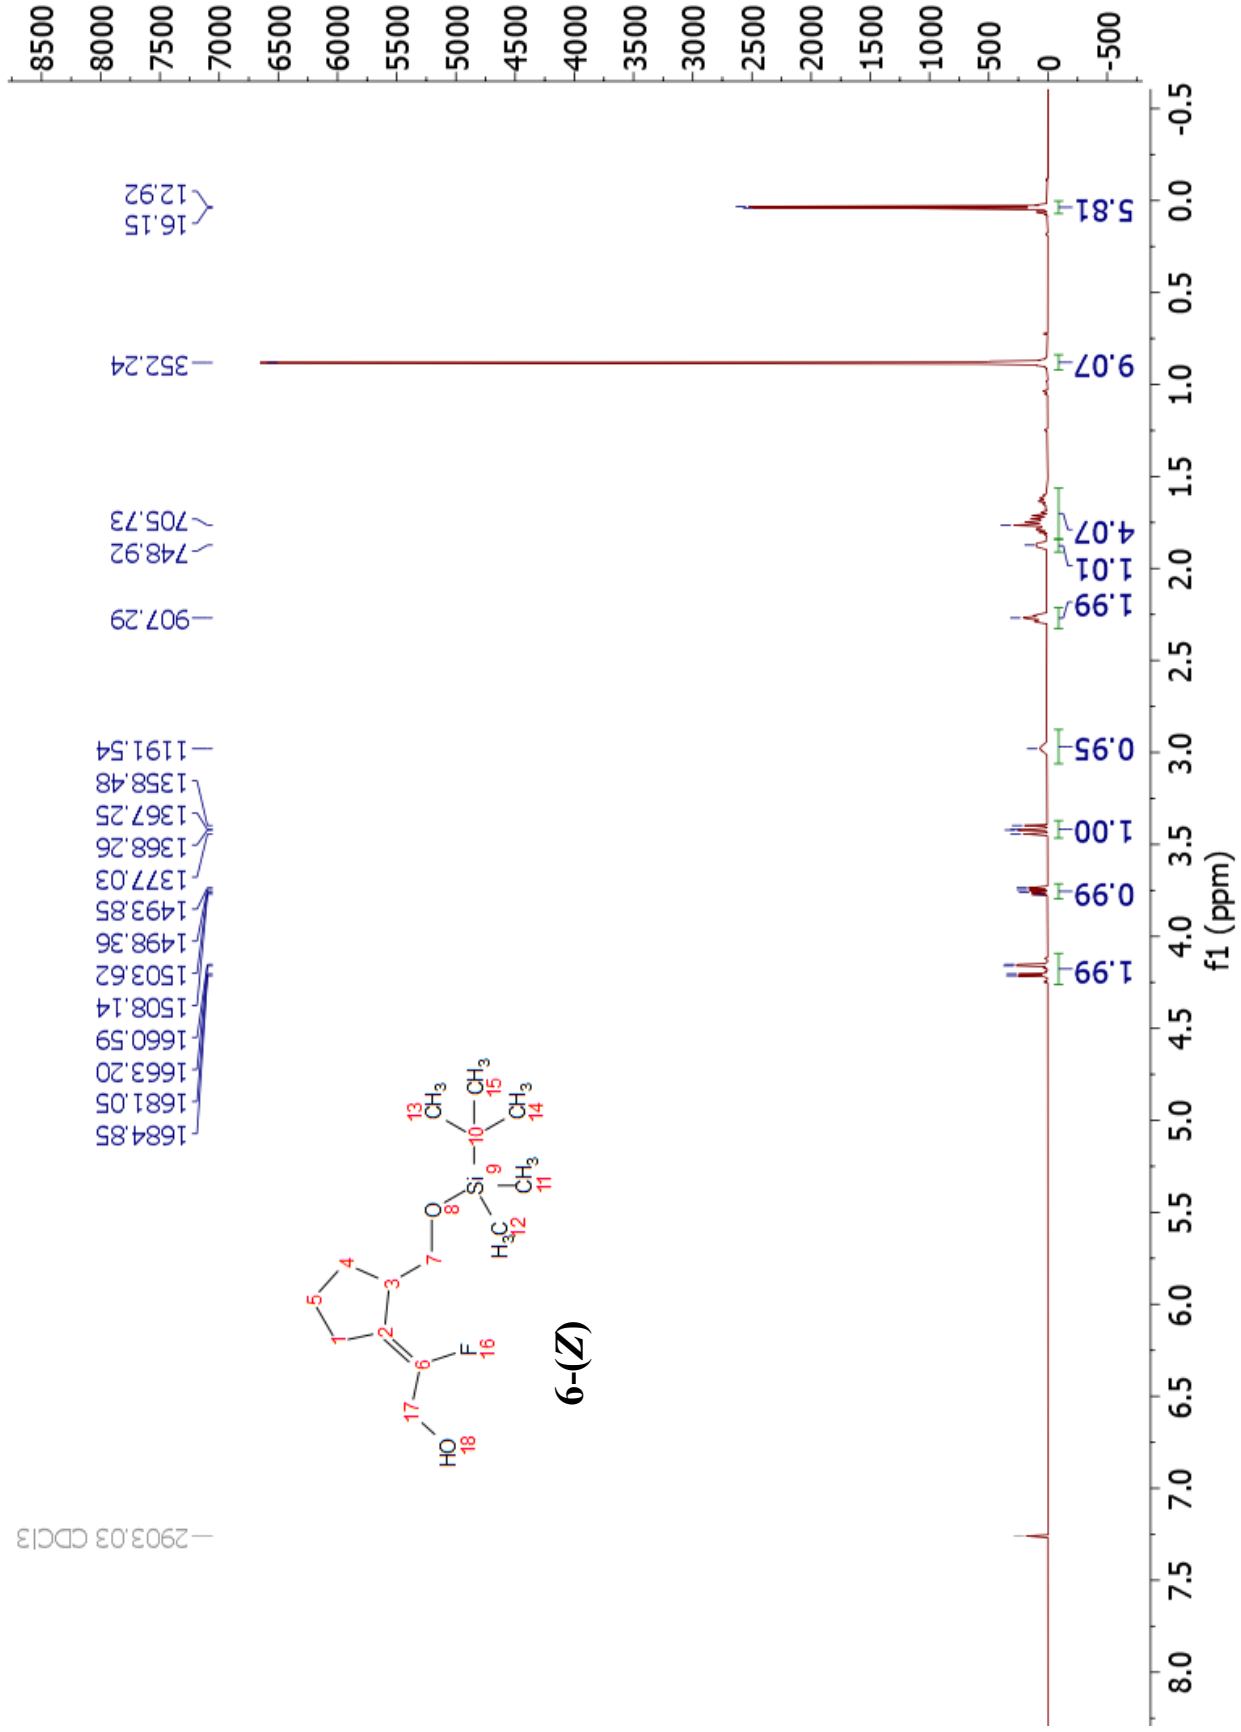

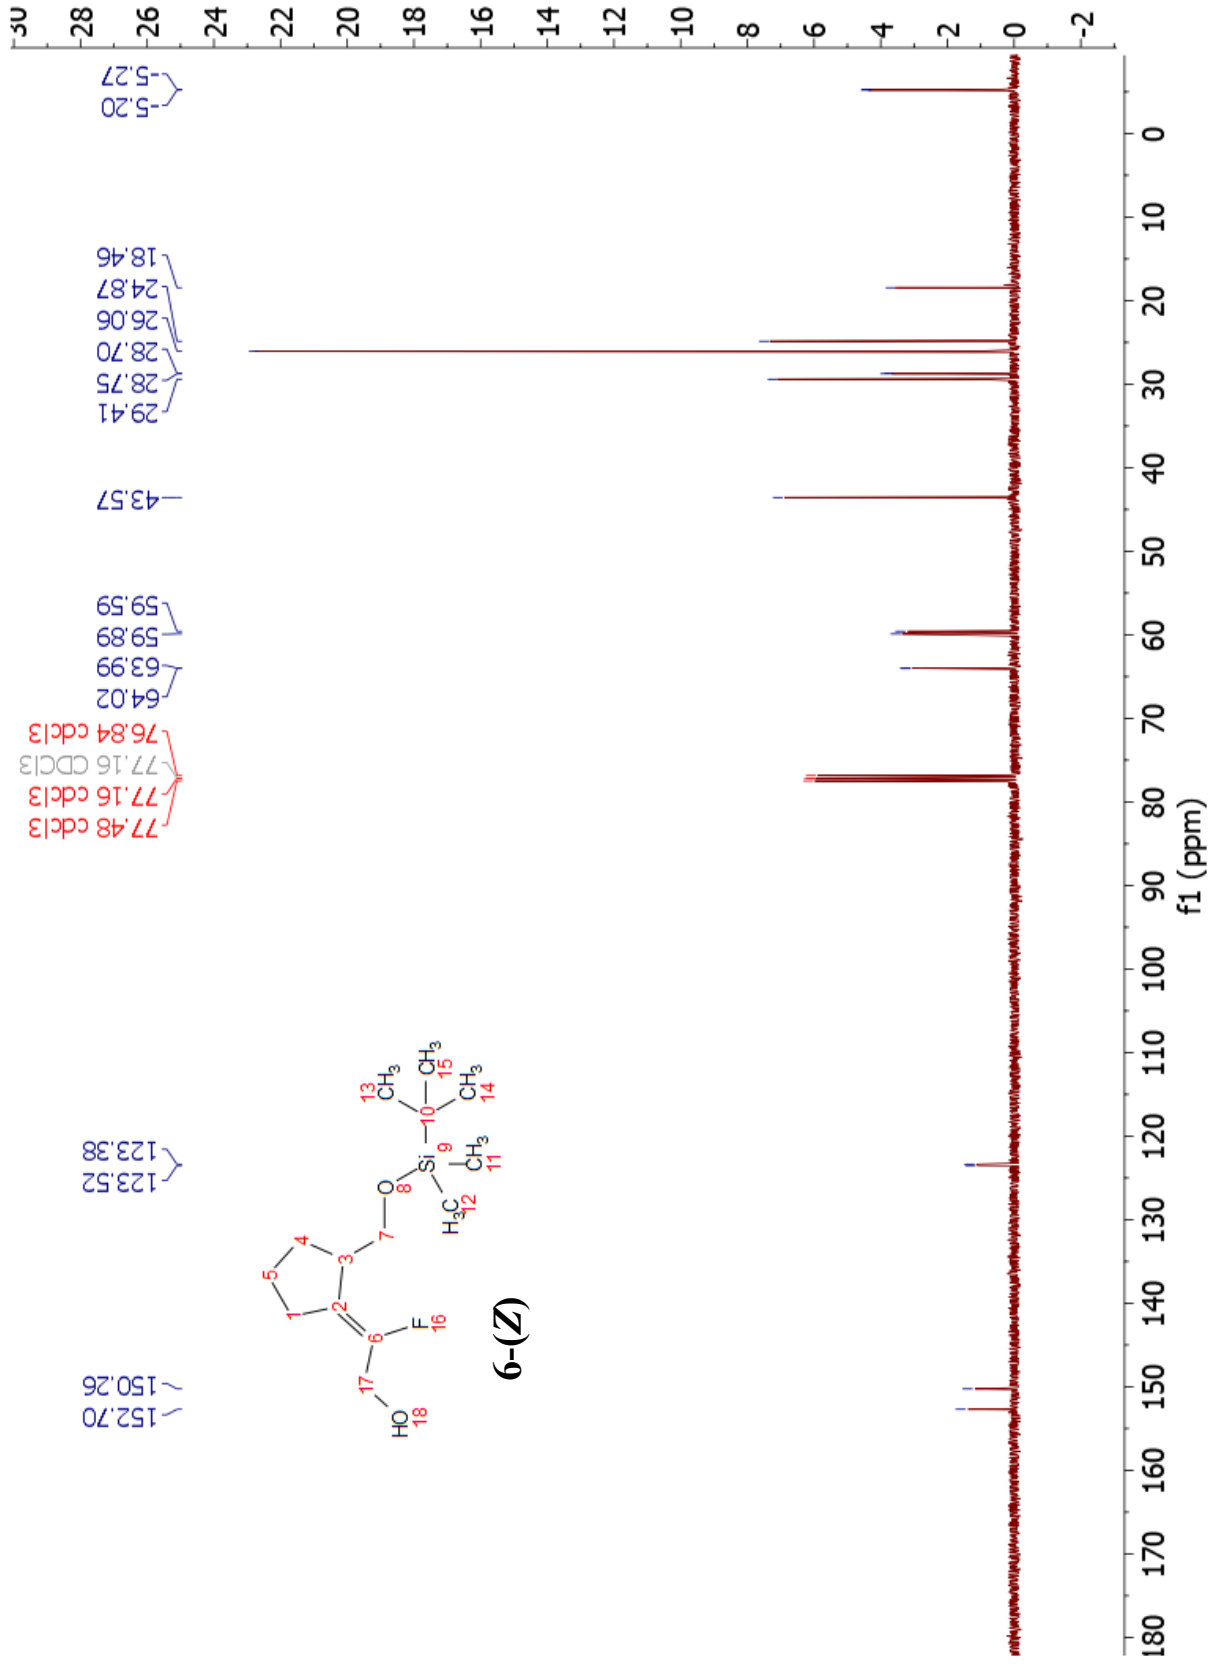

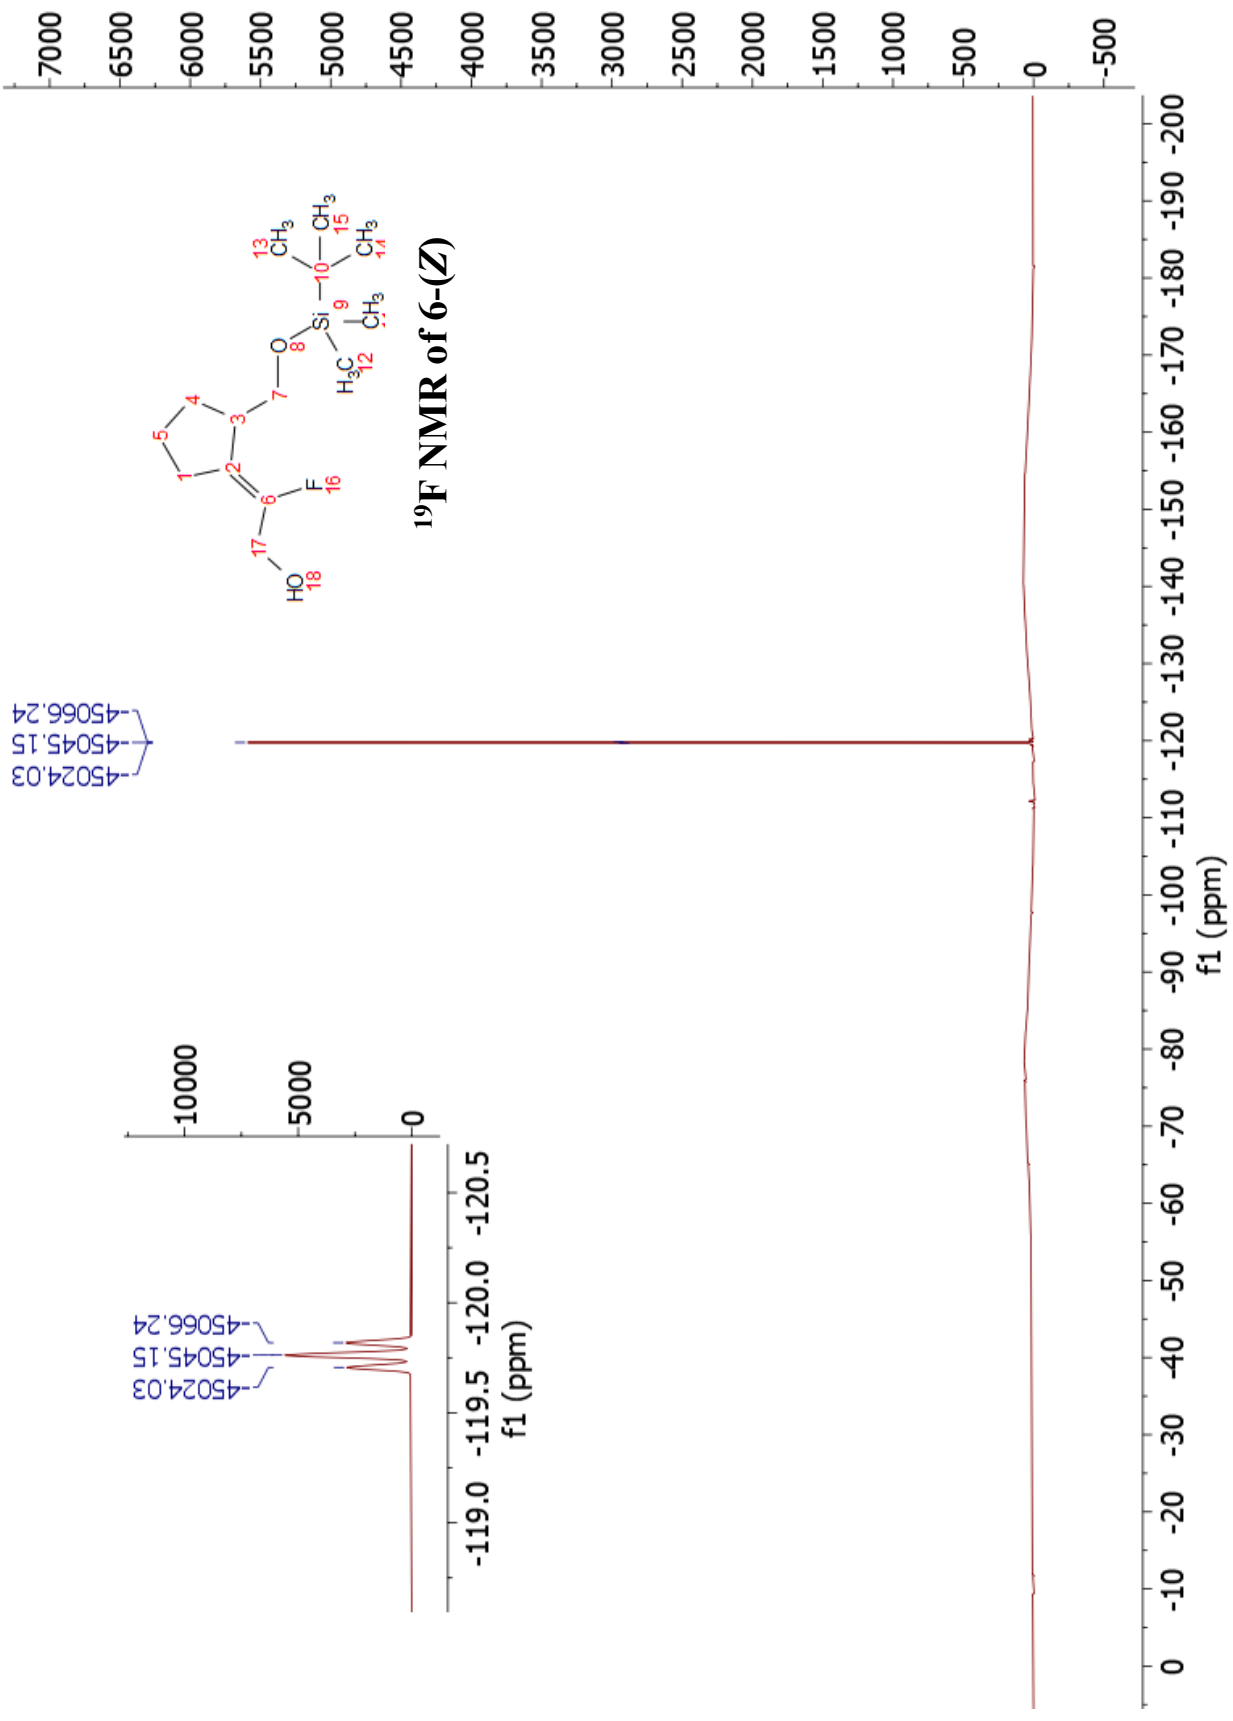

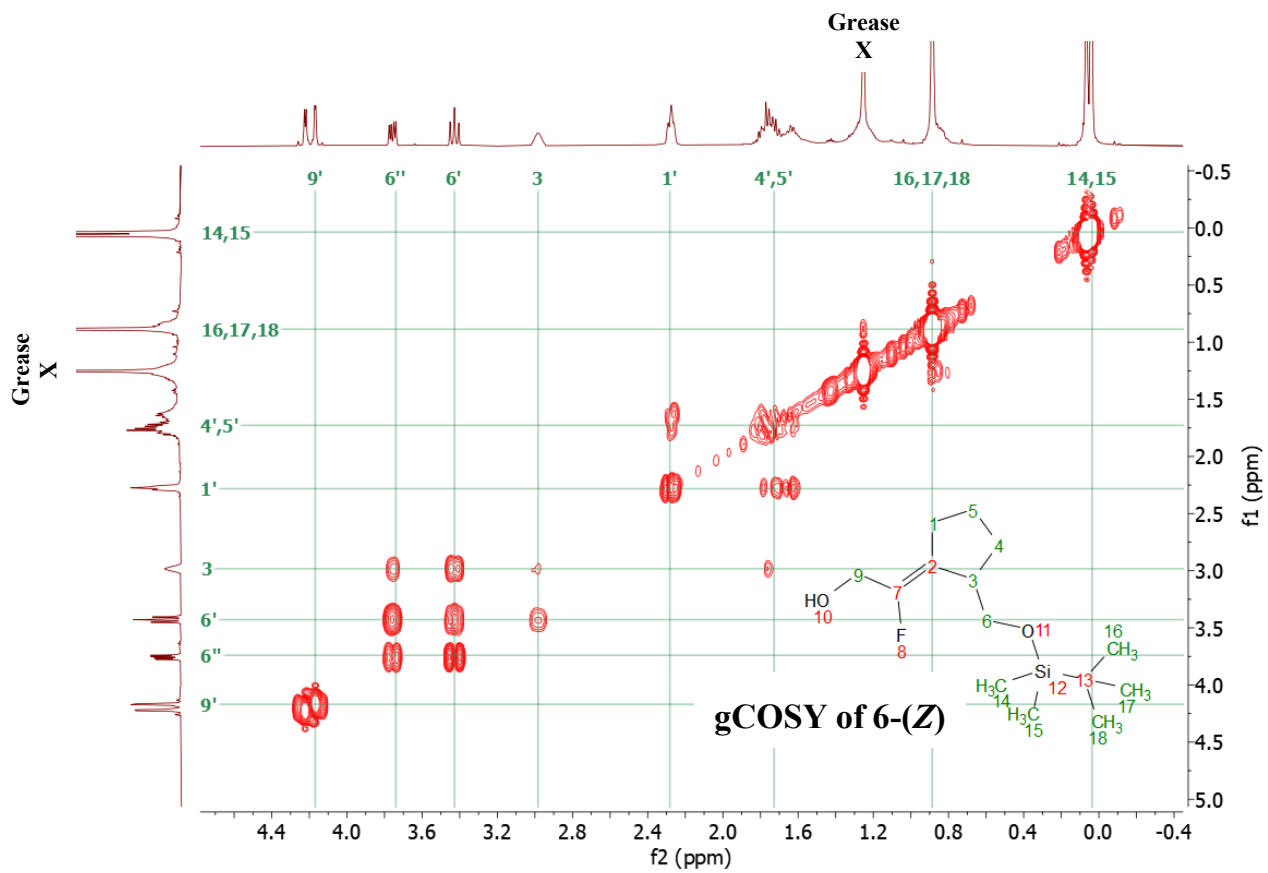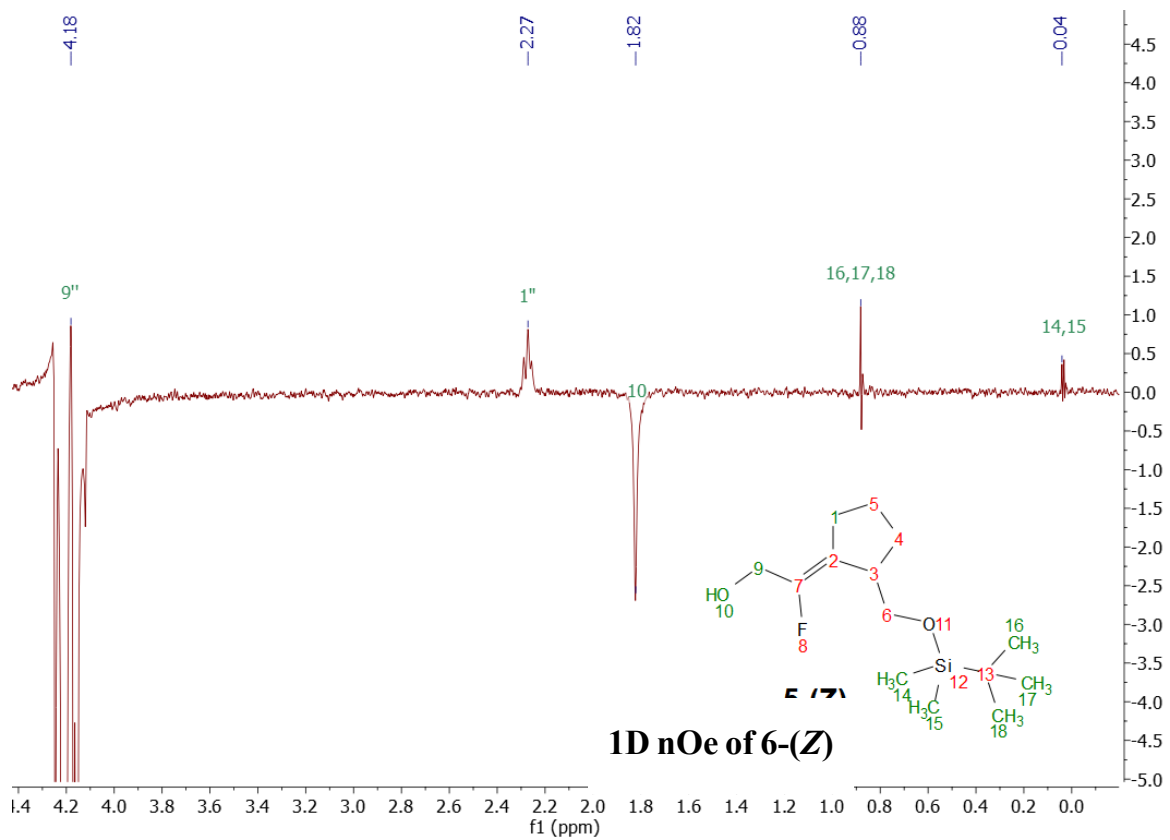

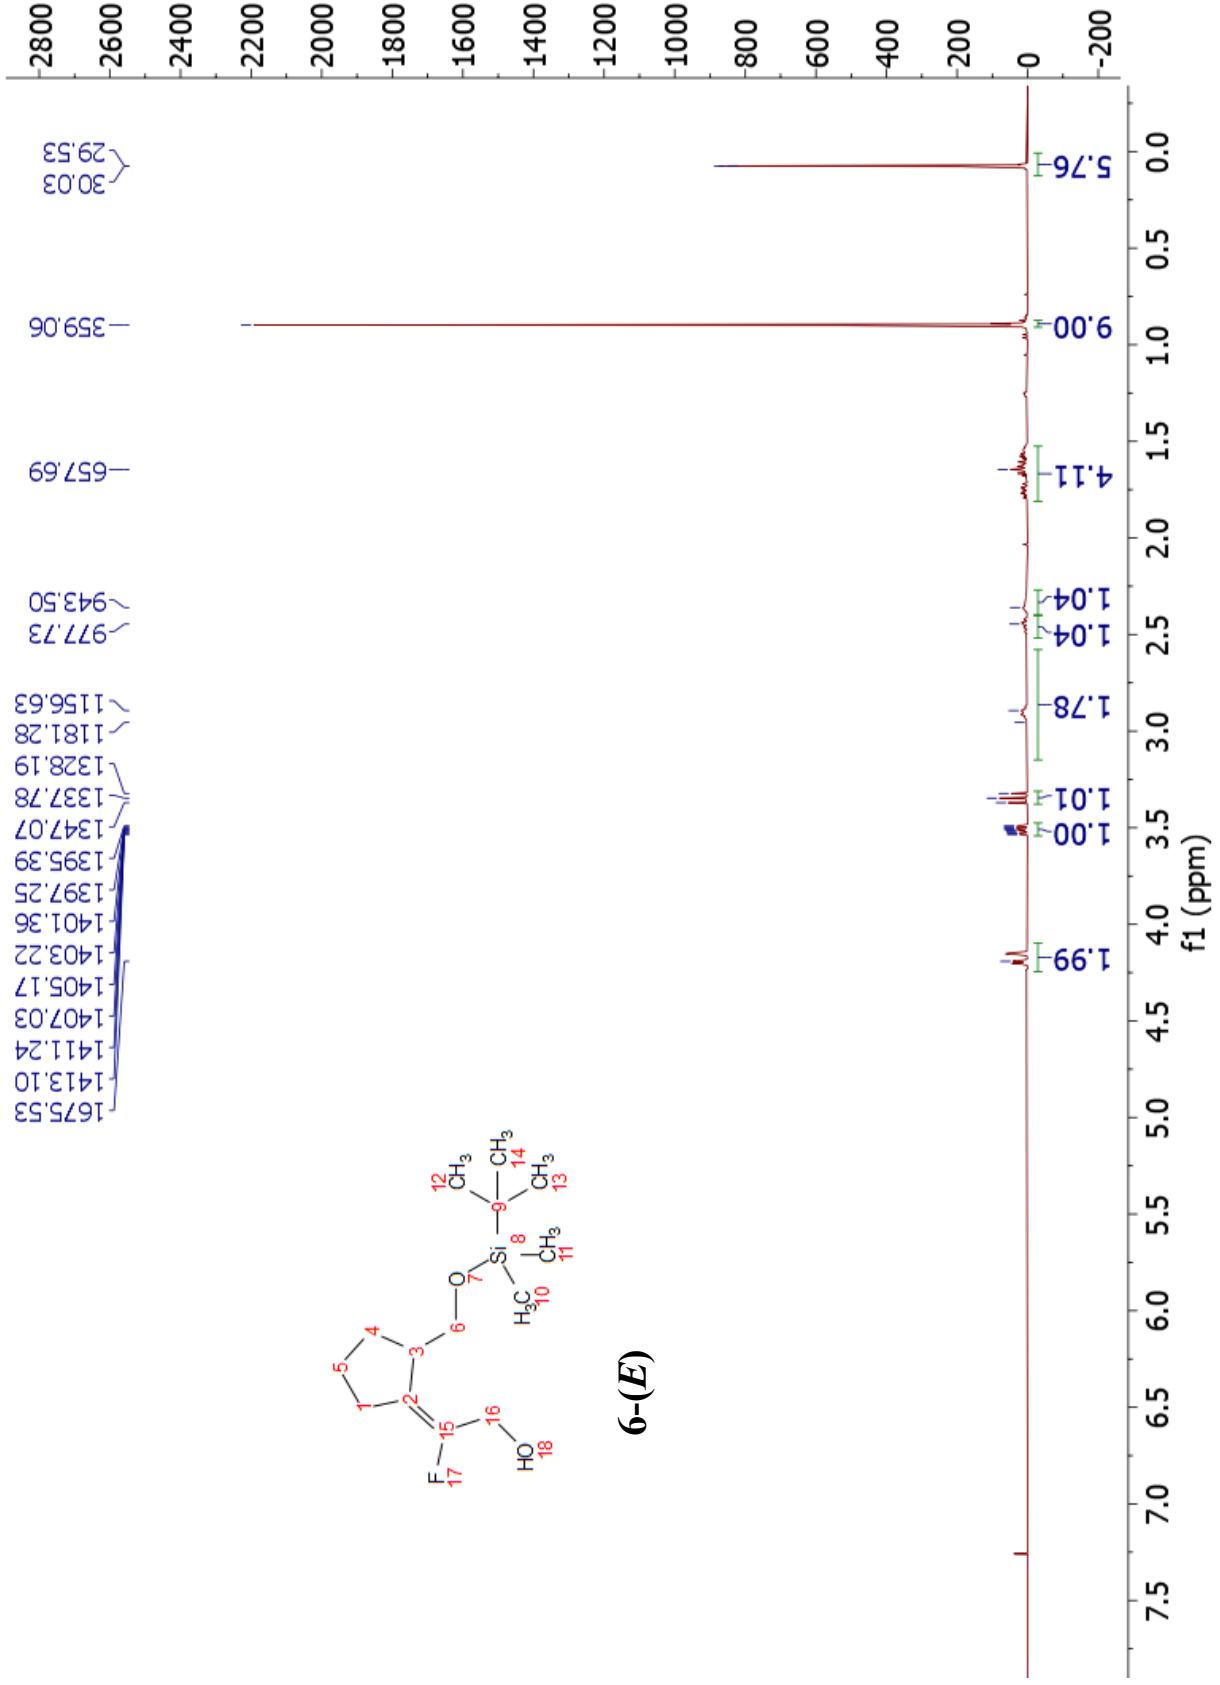

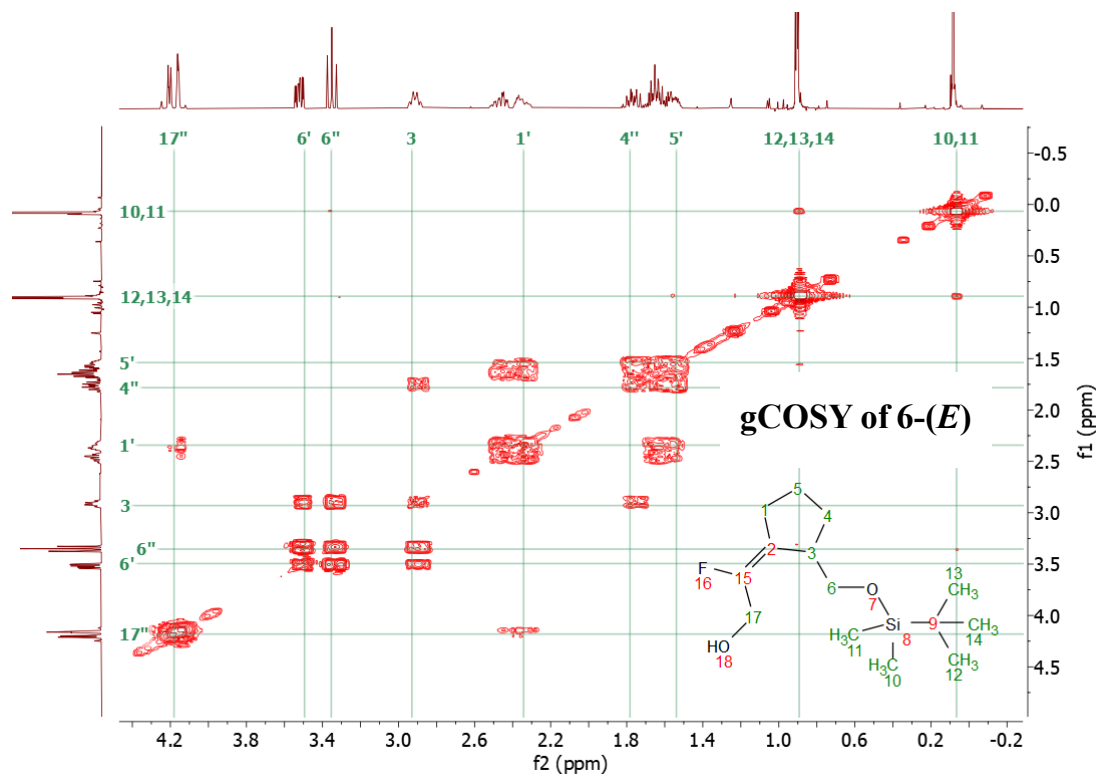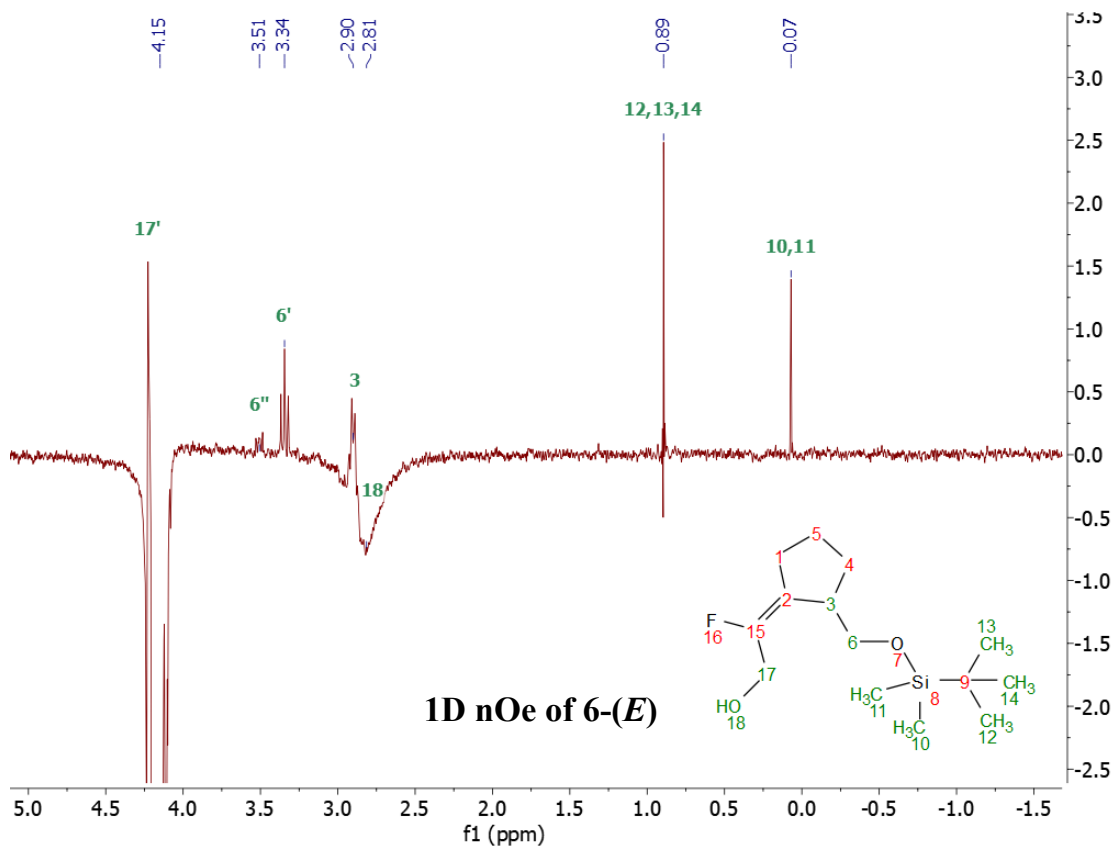

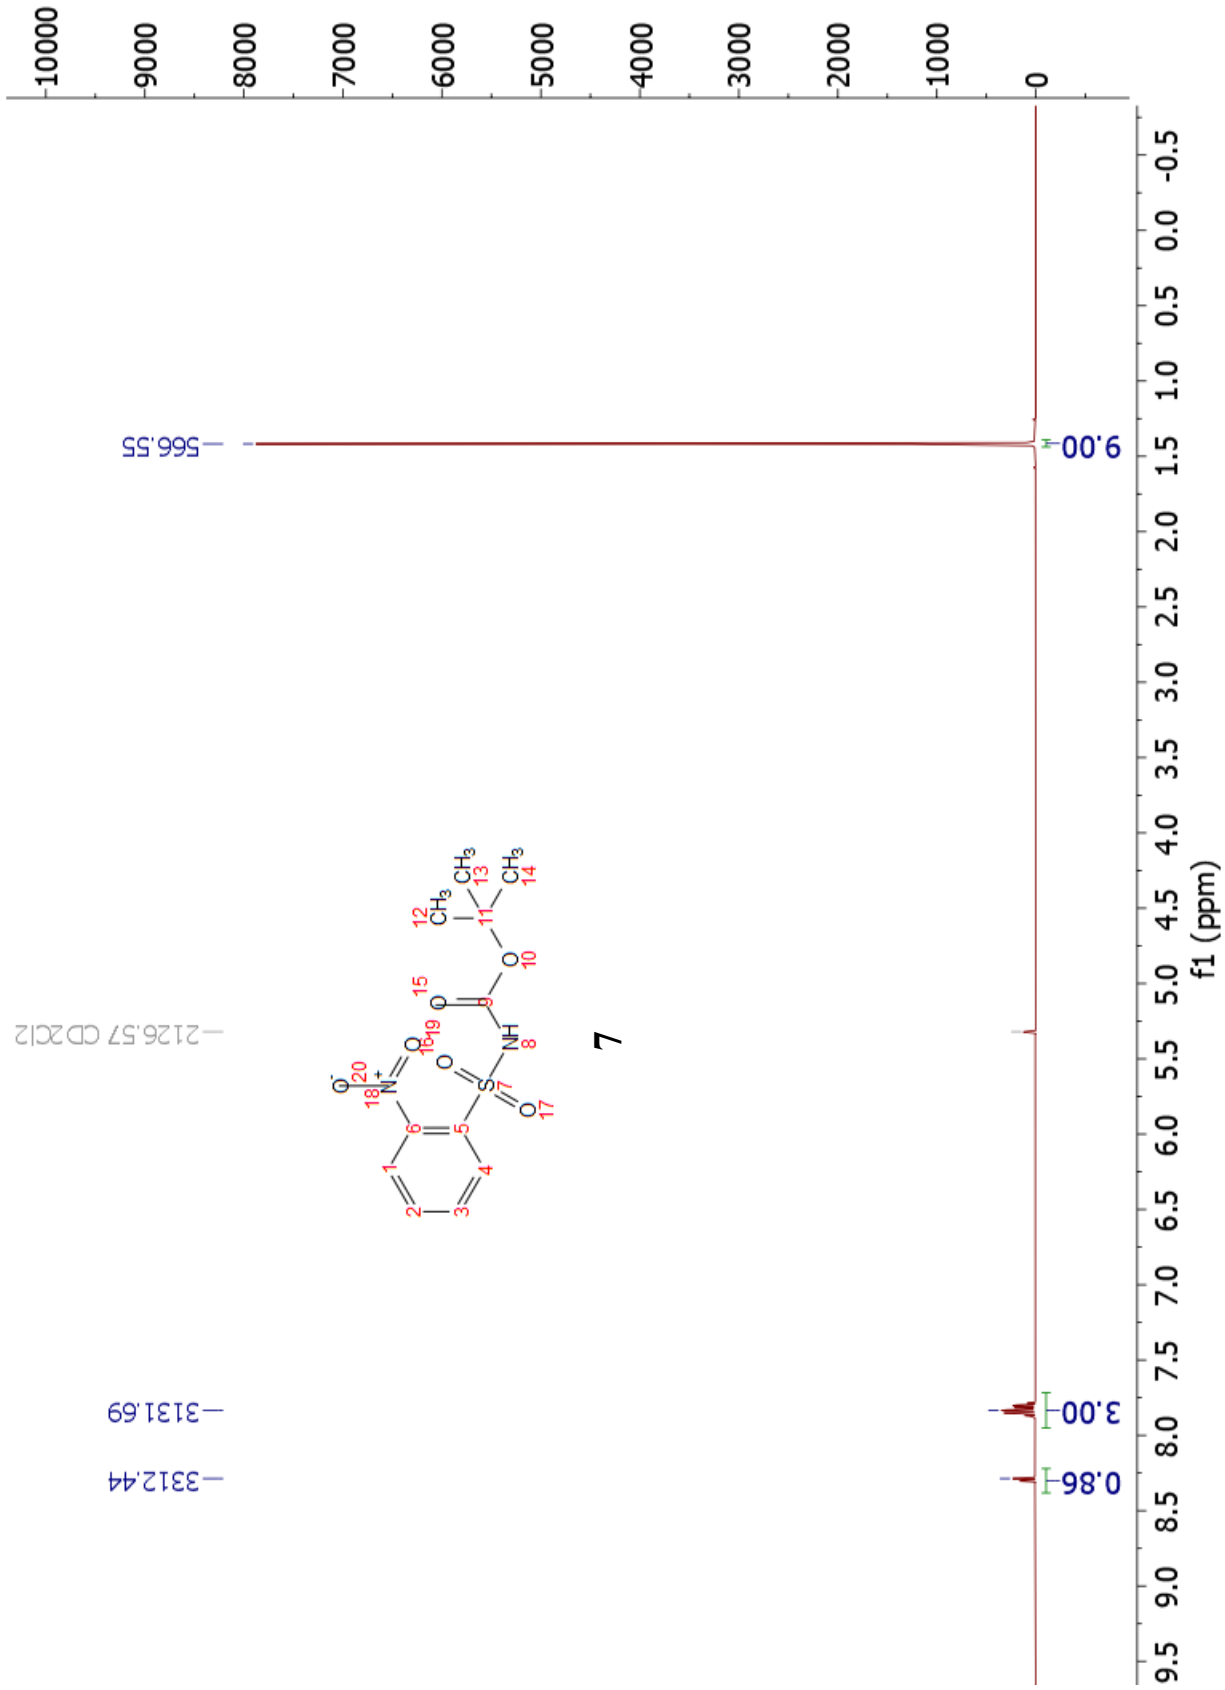

—3131.69  
—3312.44

—2126.57 CD2Cl2

—566.55

7



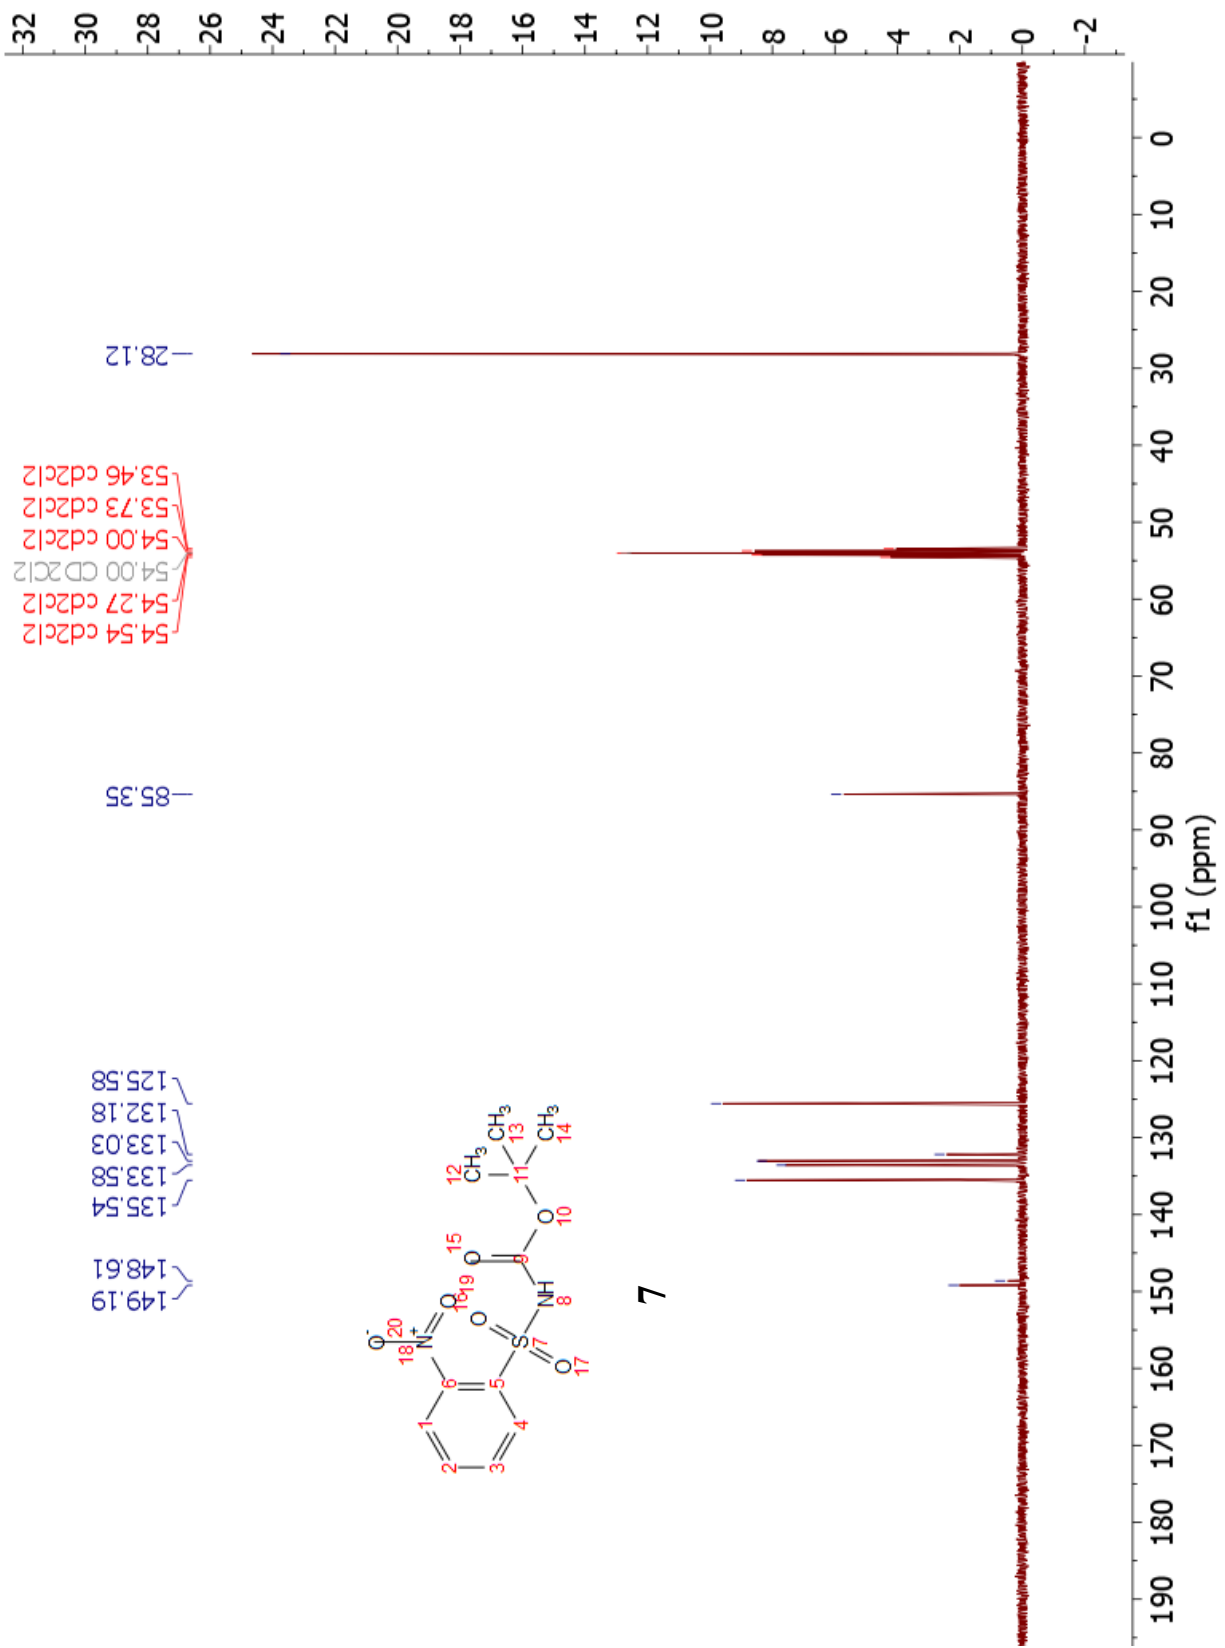

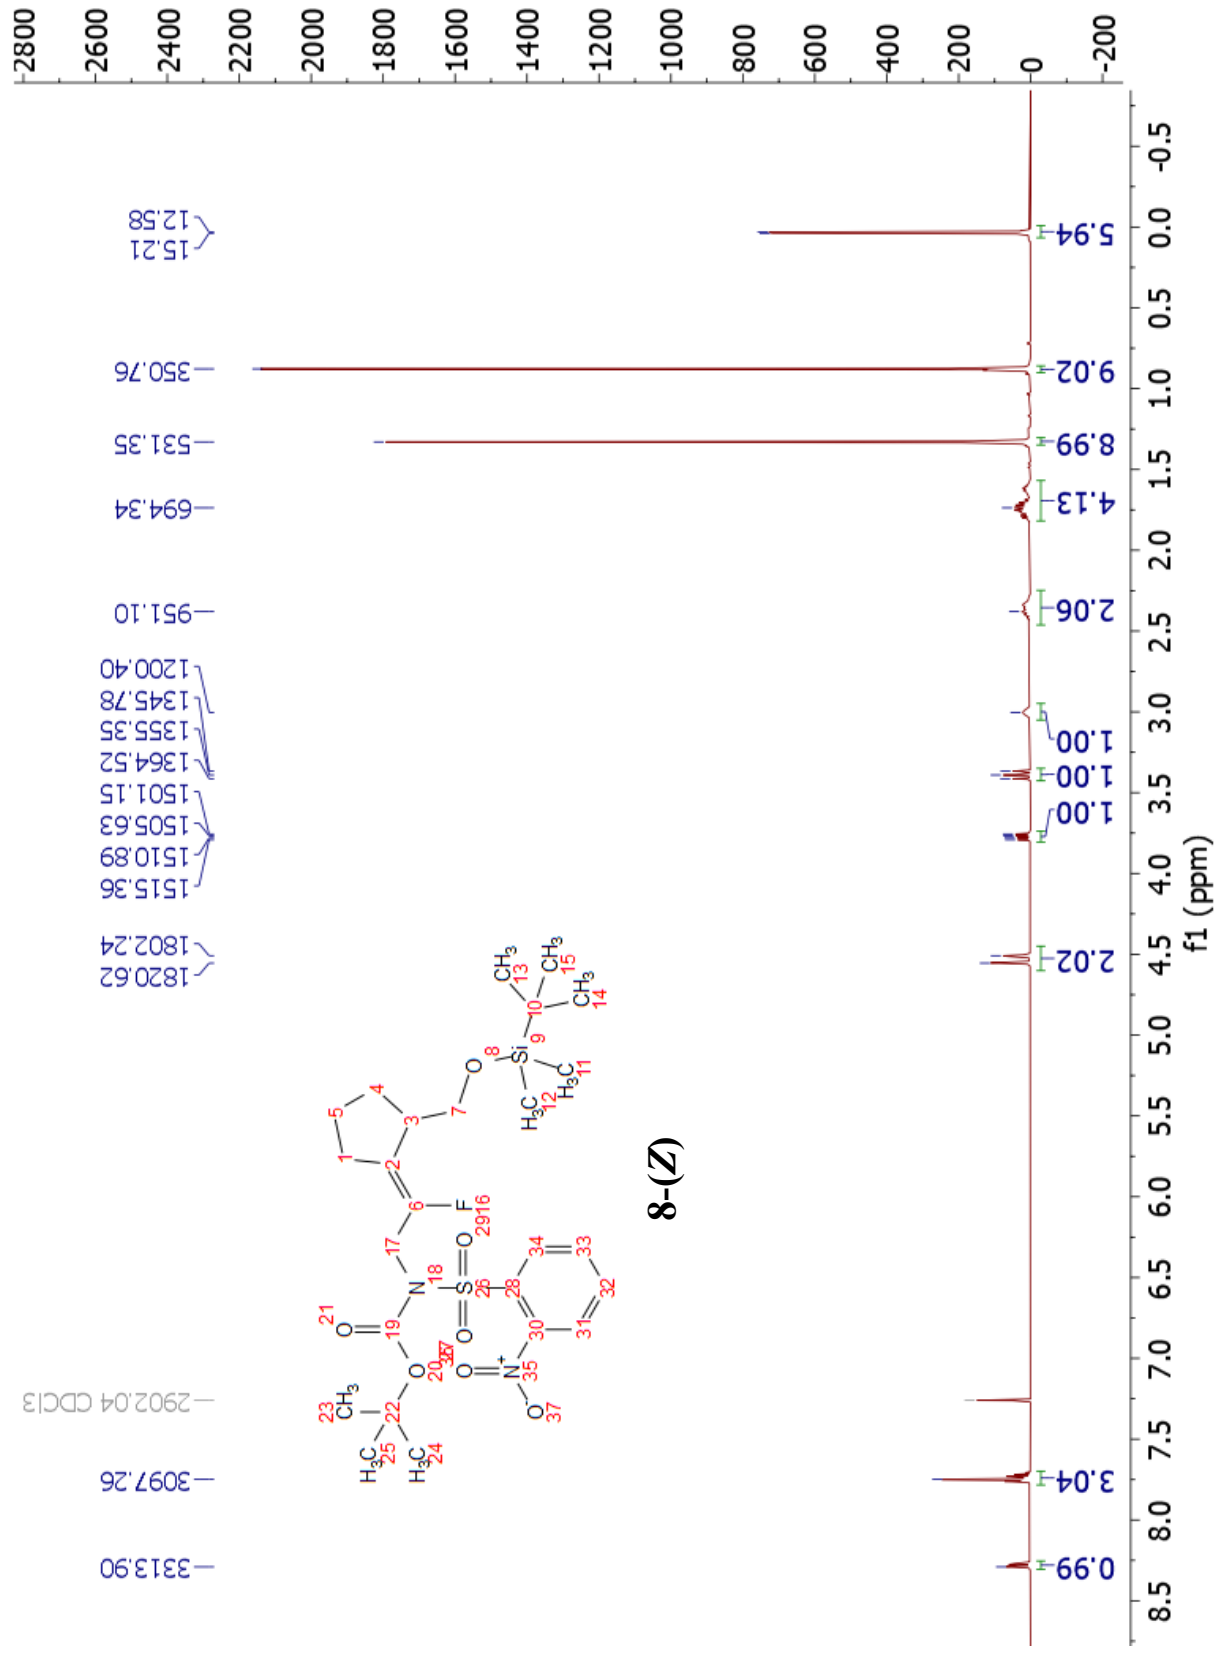

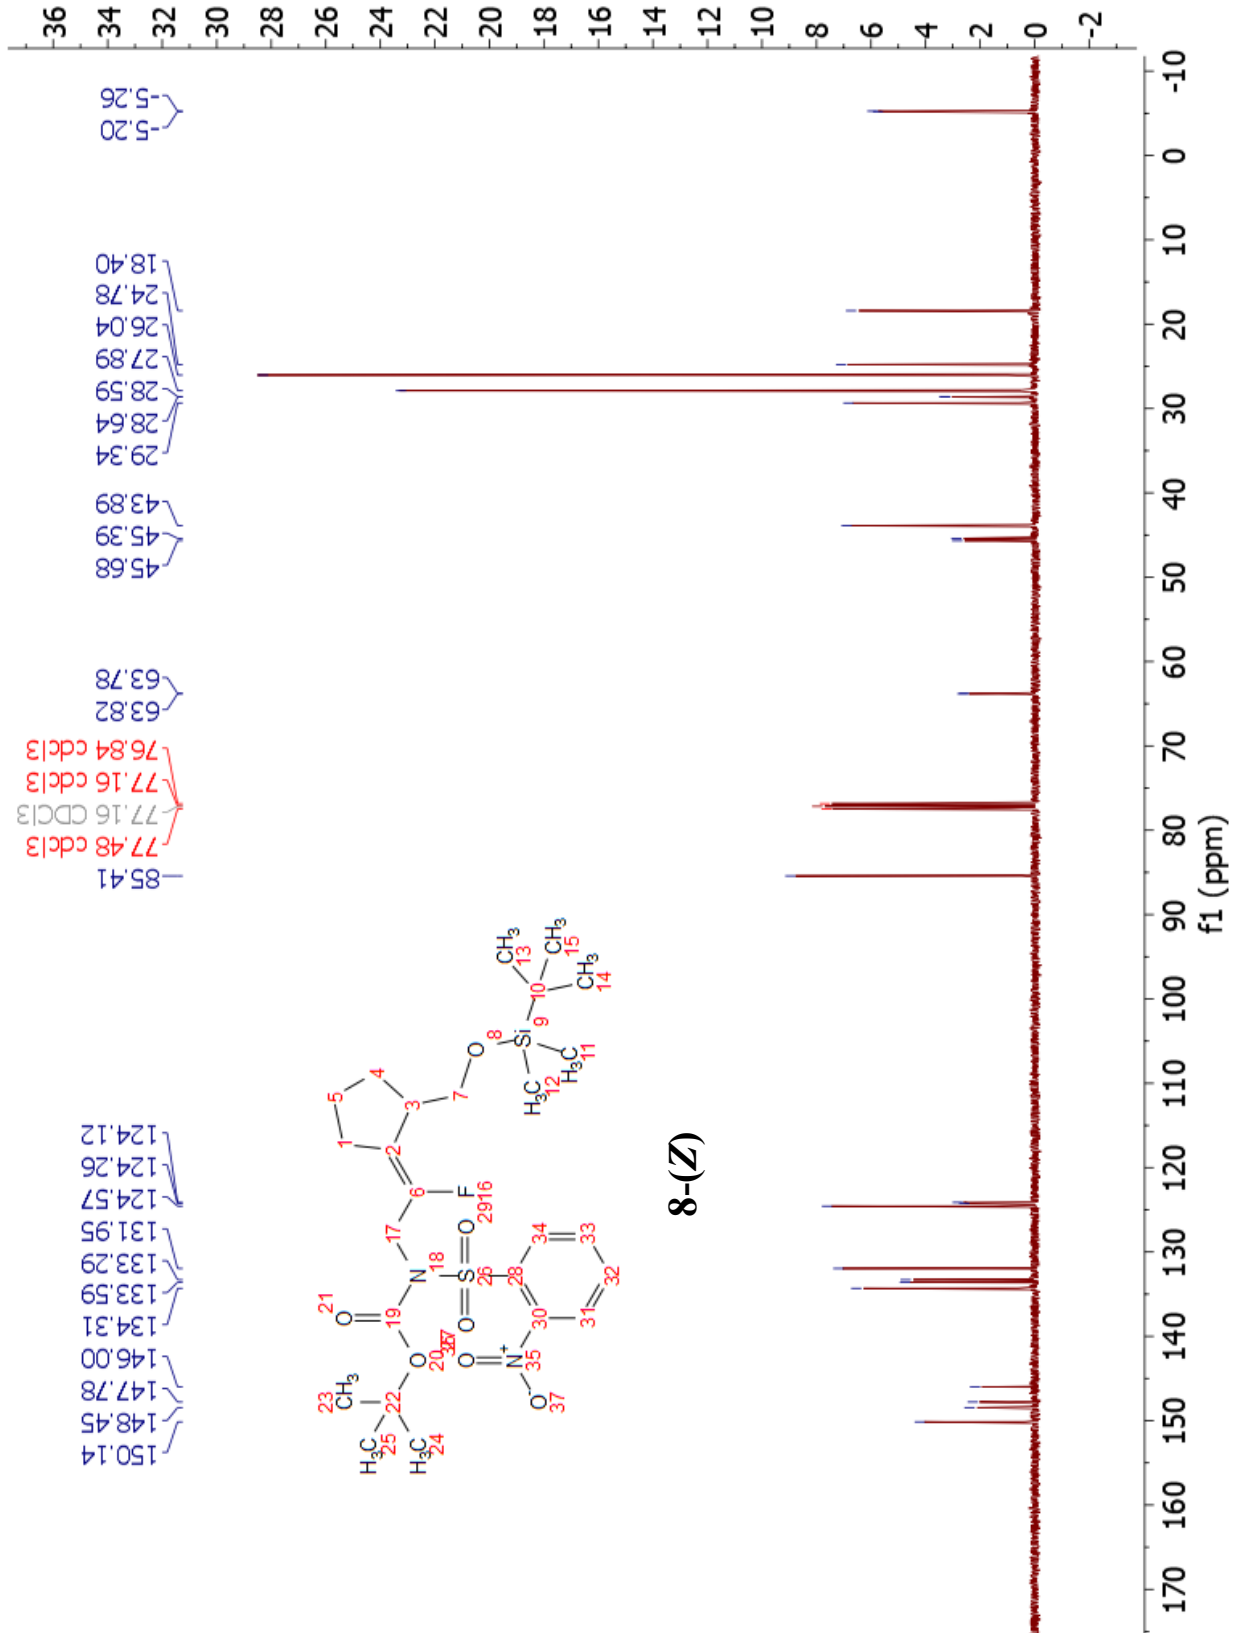

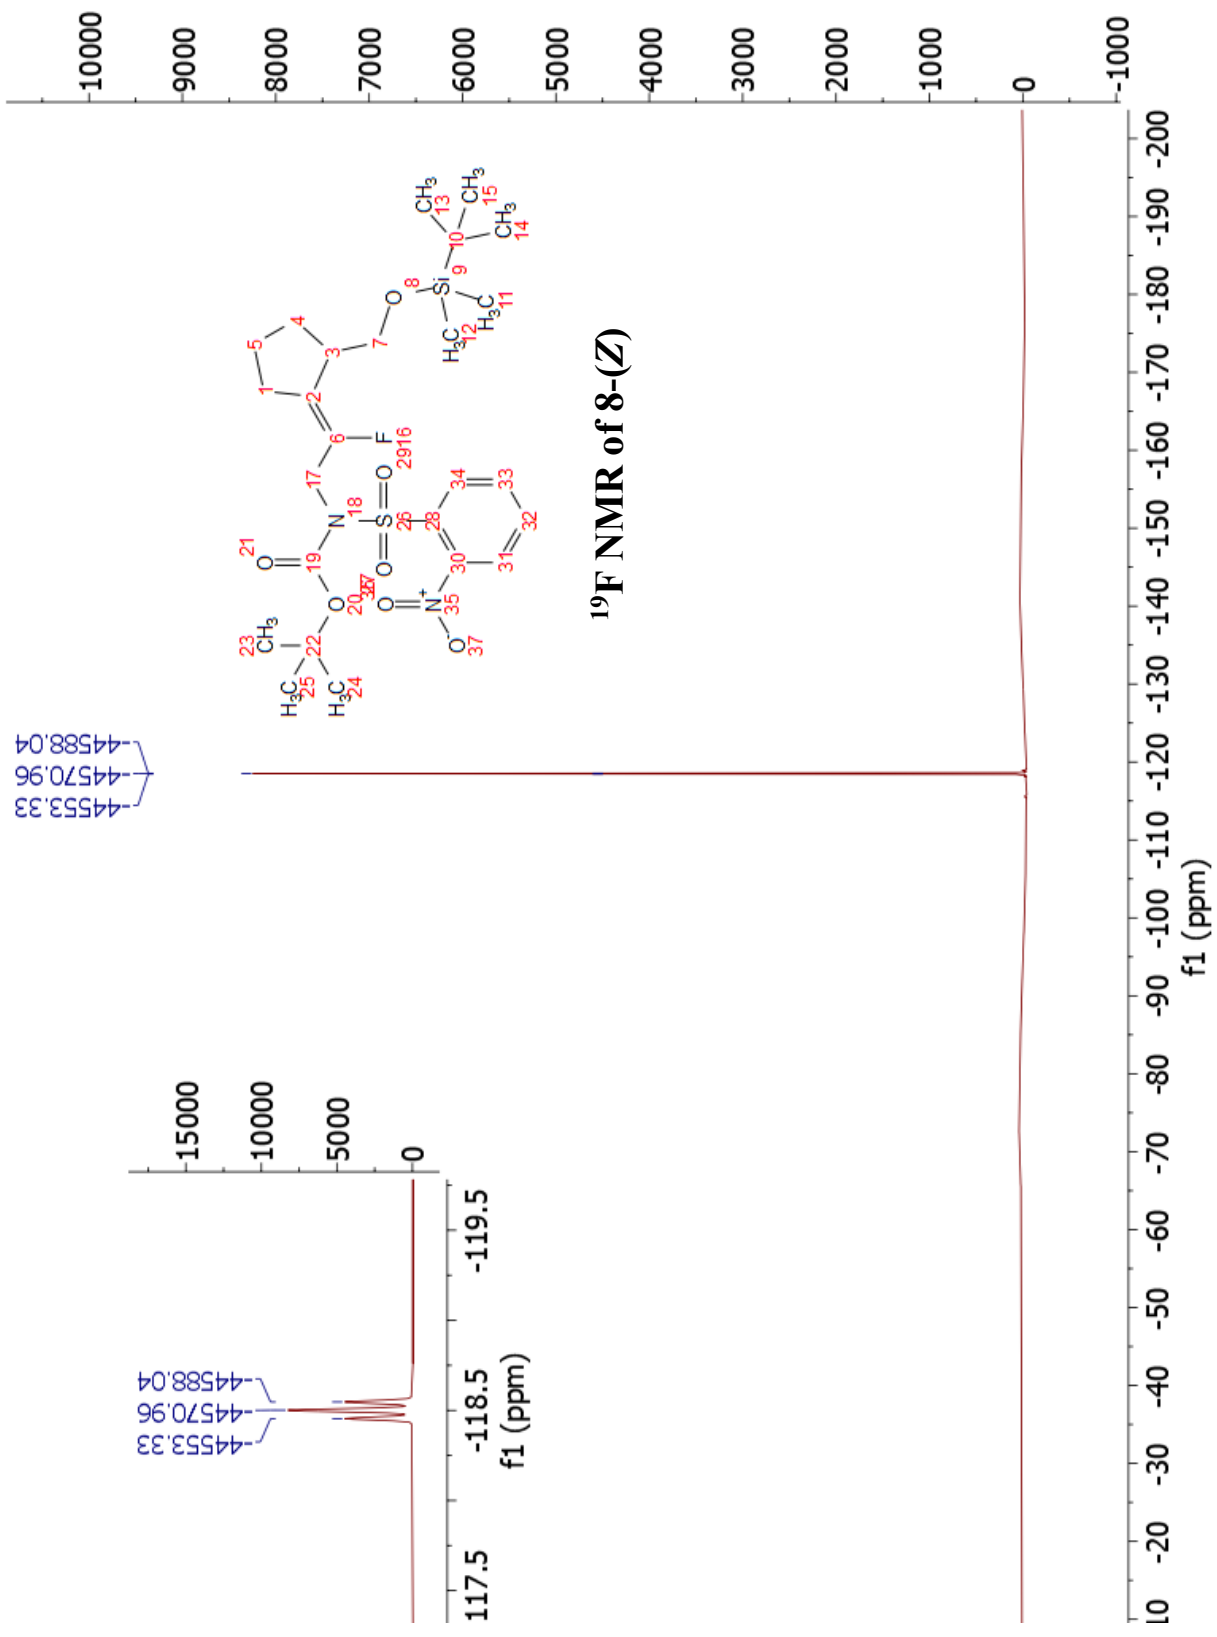

$^{19}\text{F}$  NMR of 8-(Z)

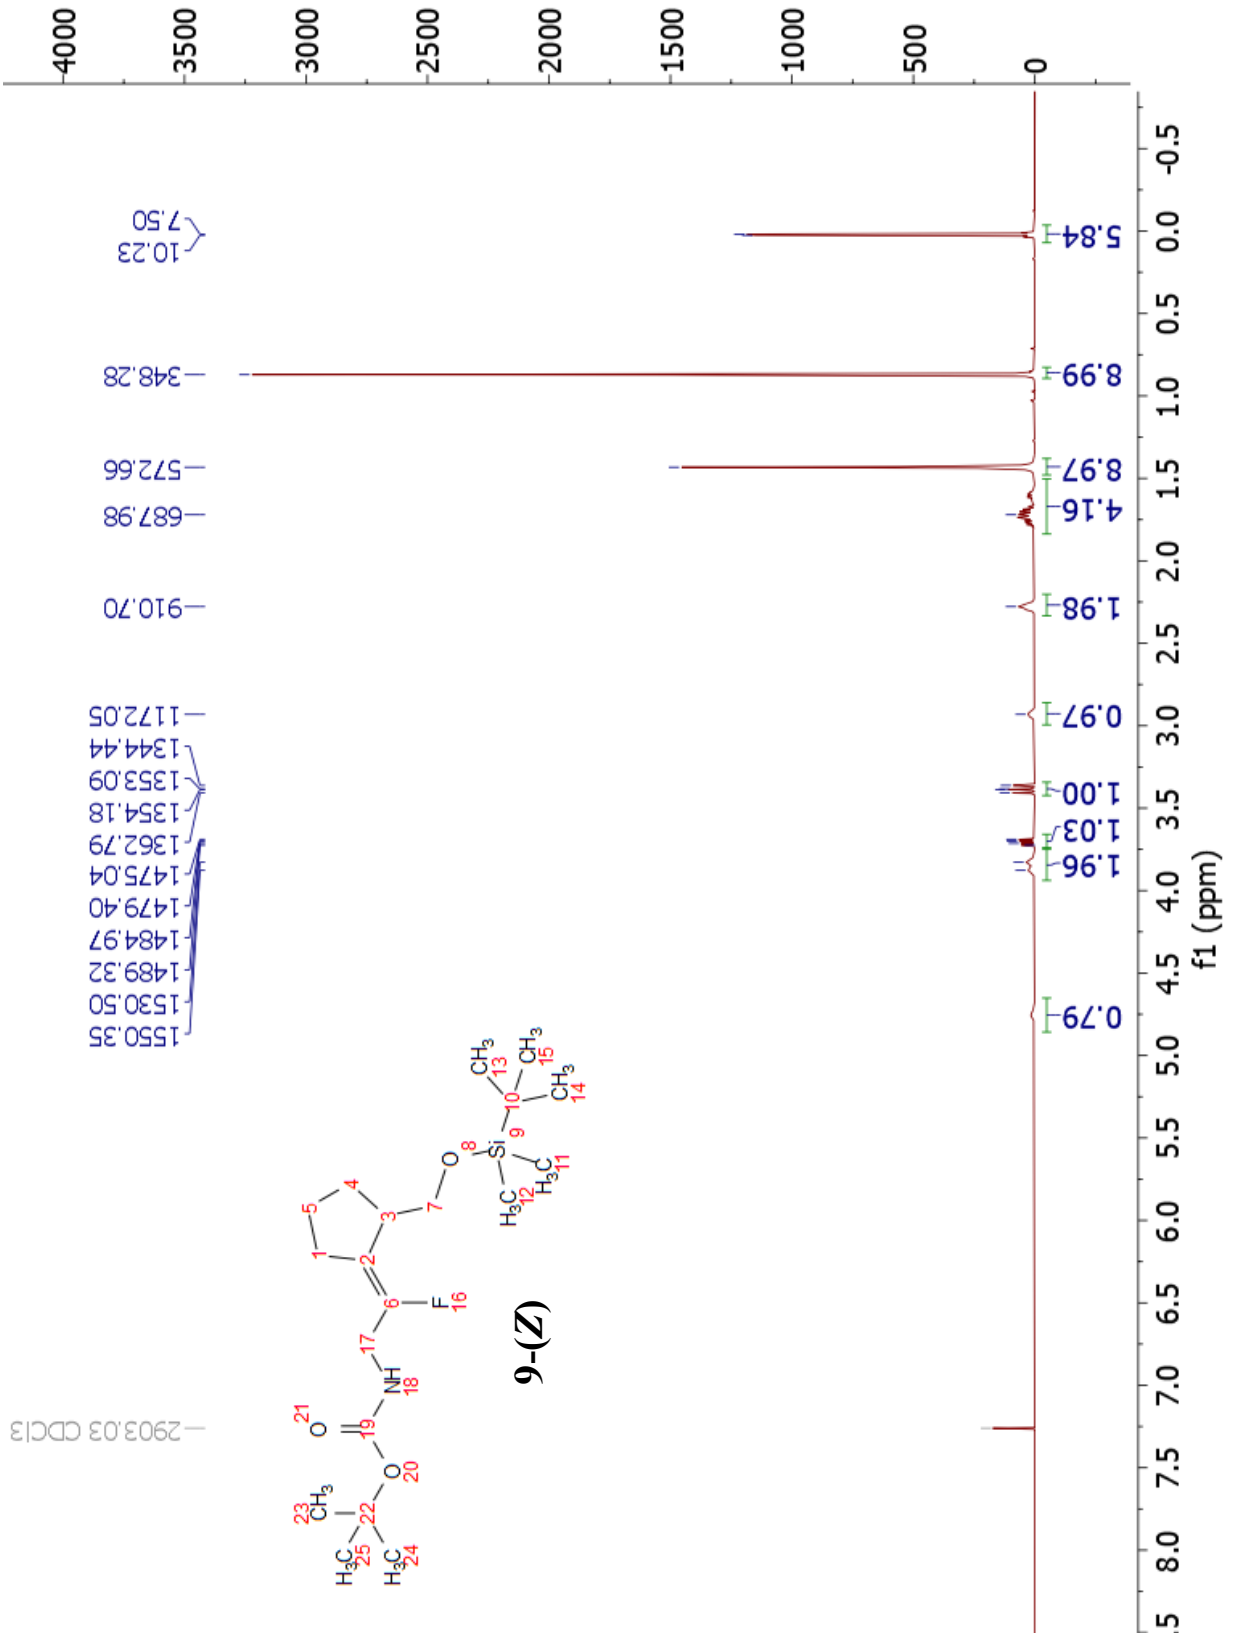

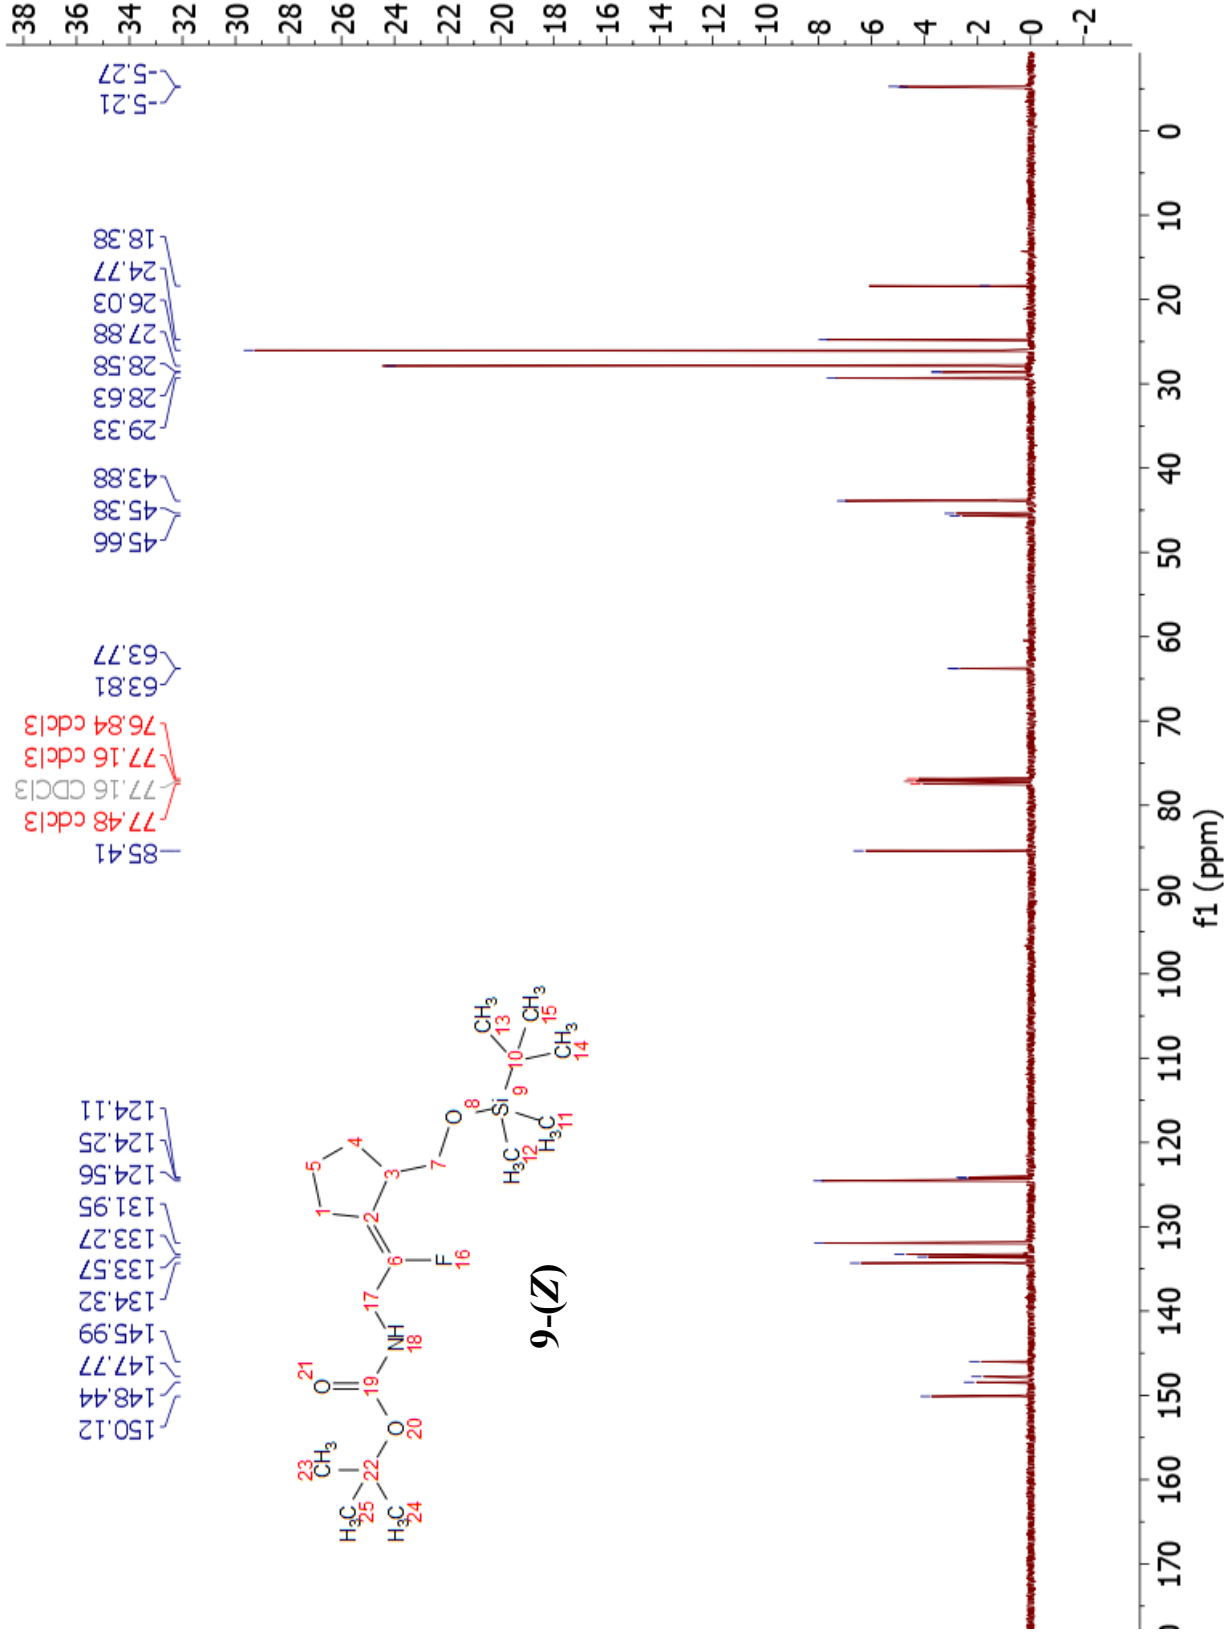

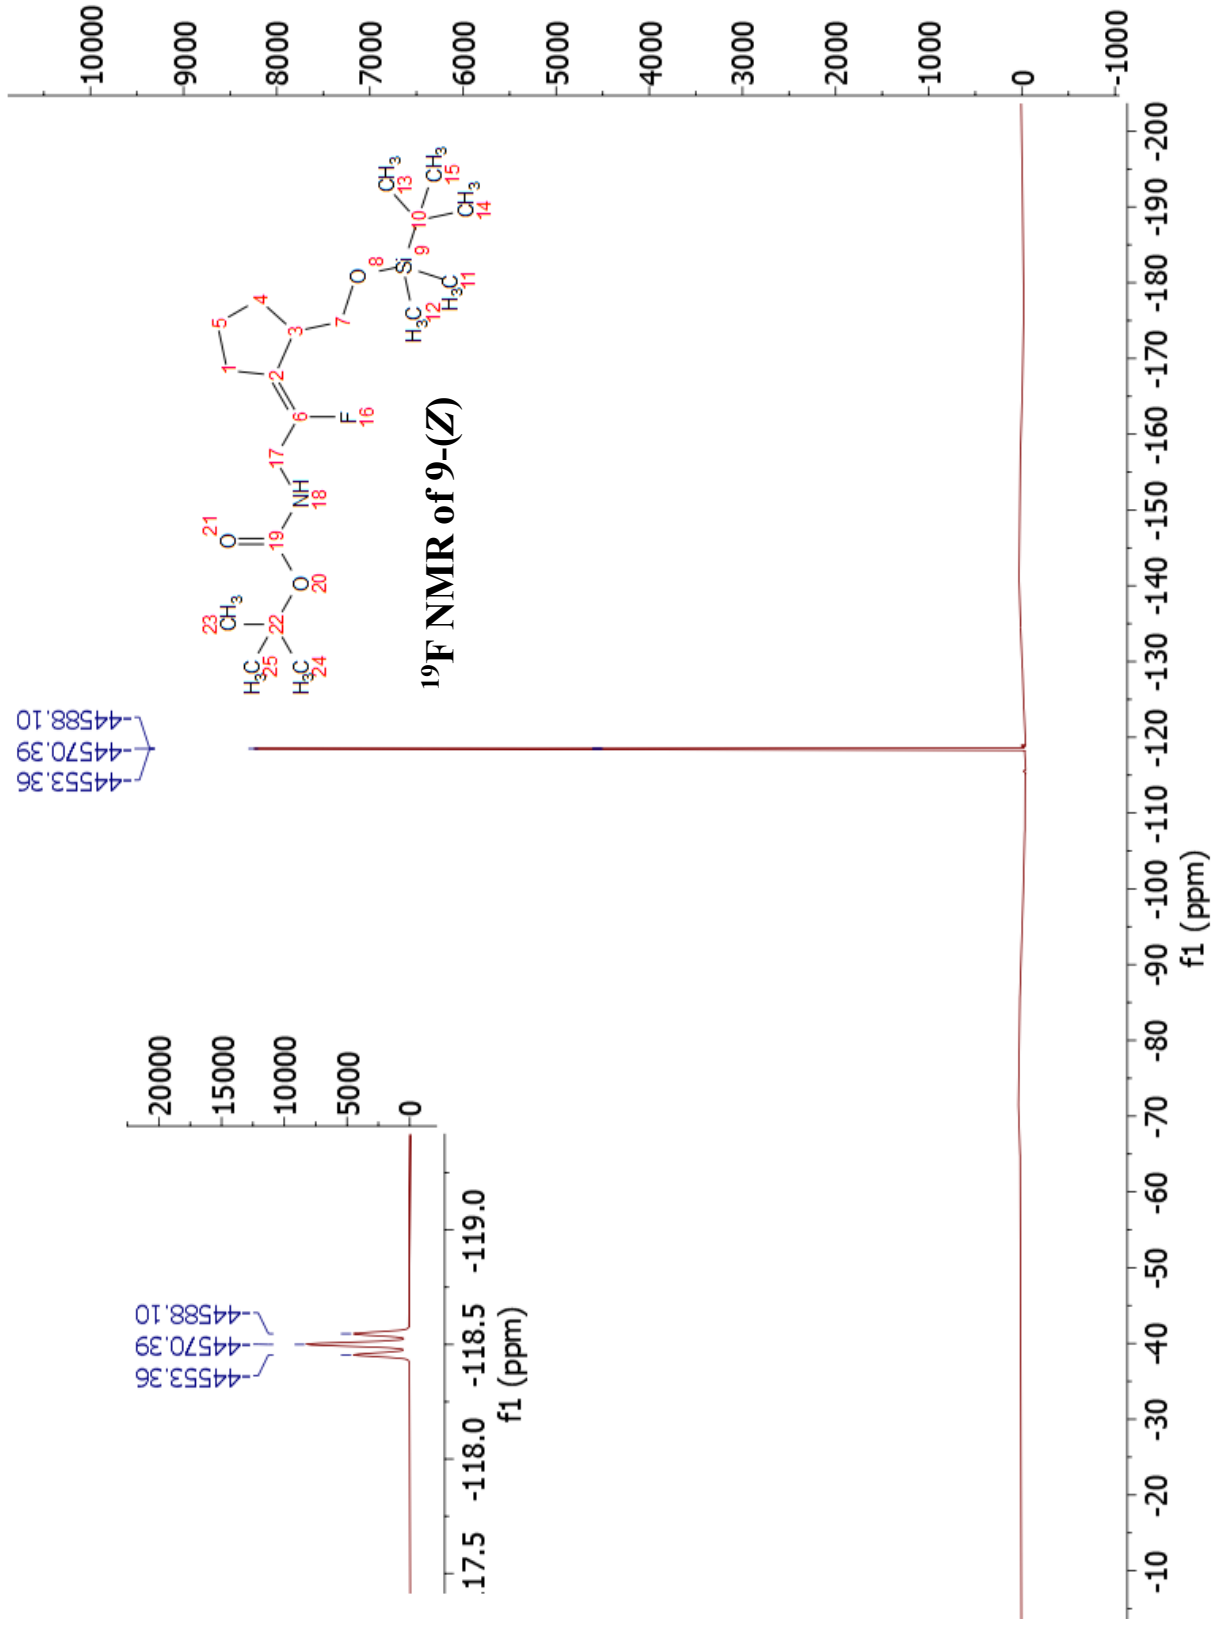

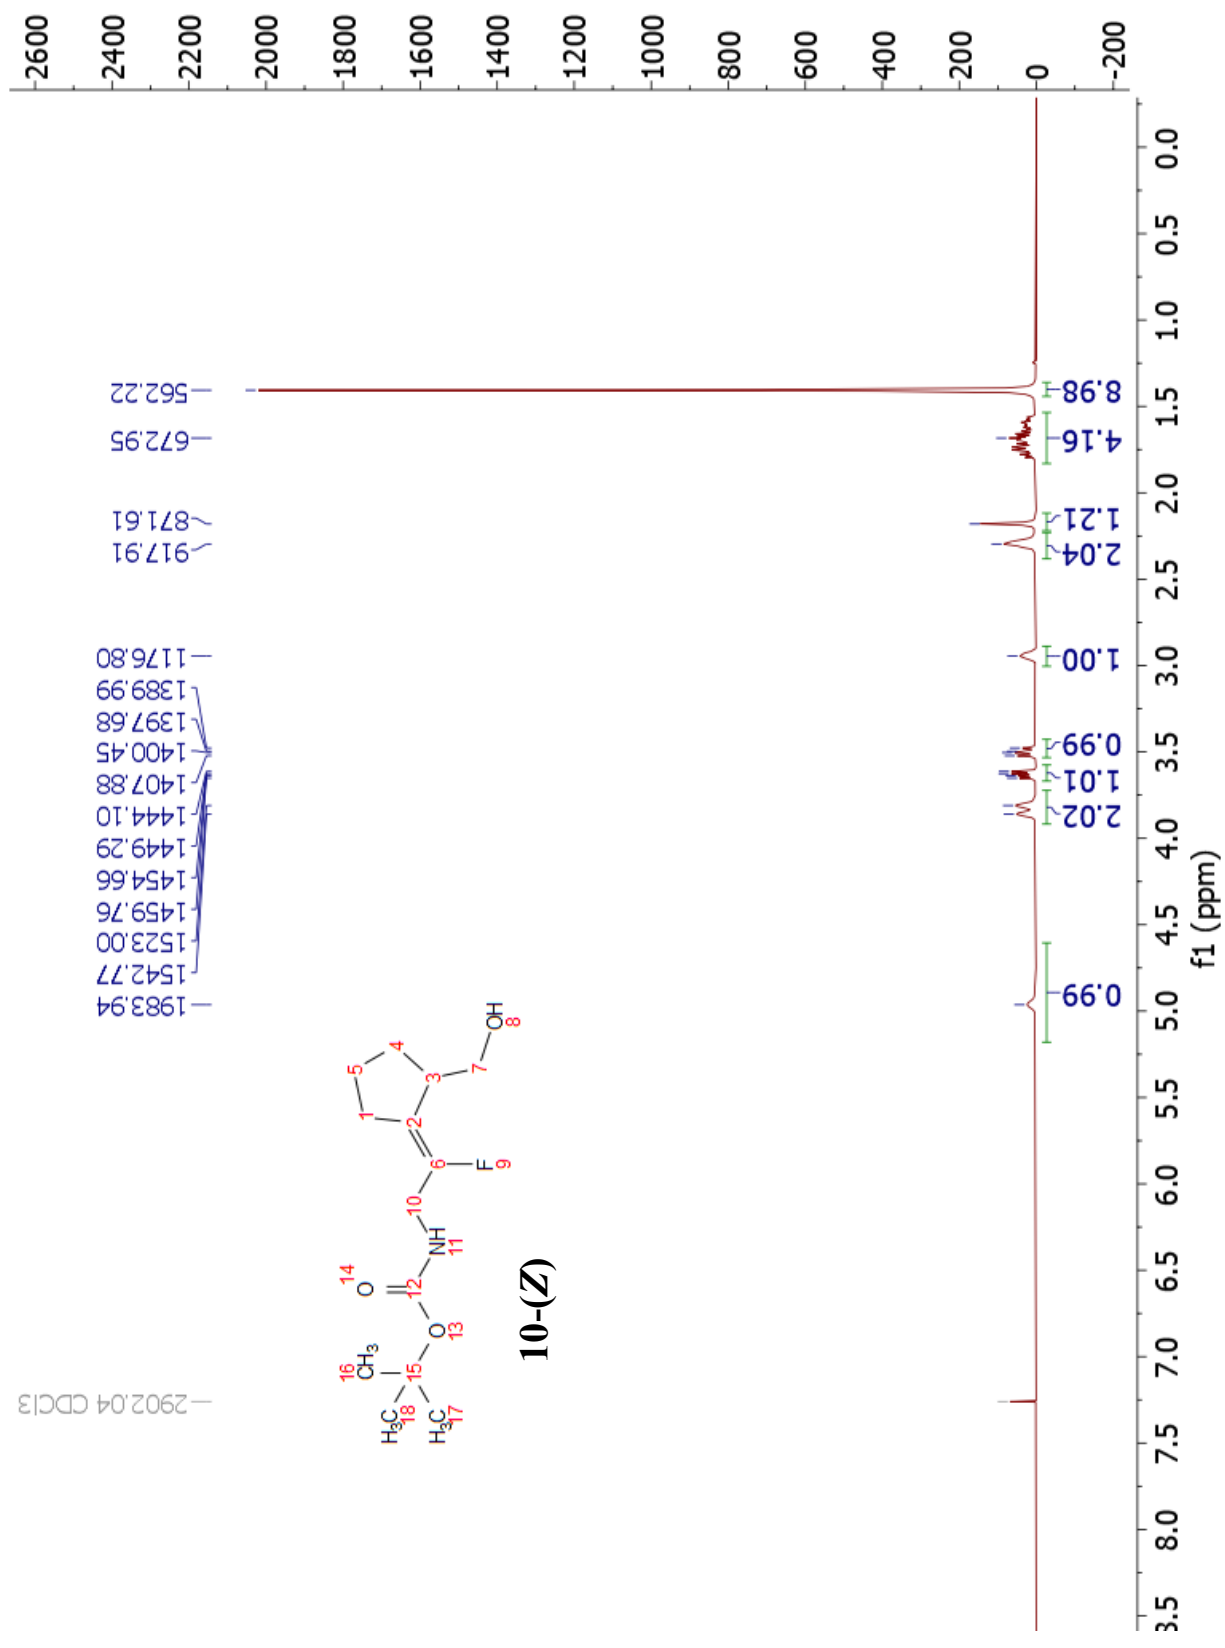



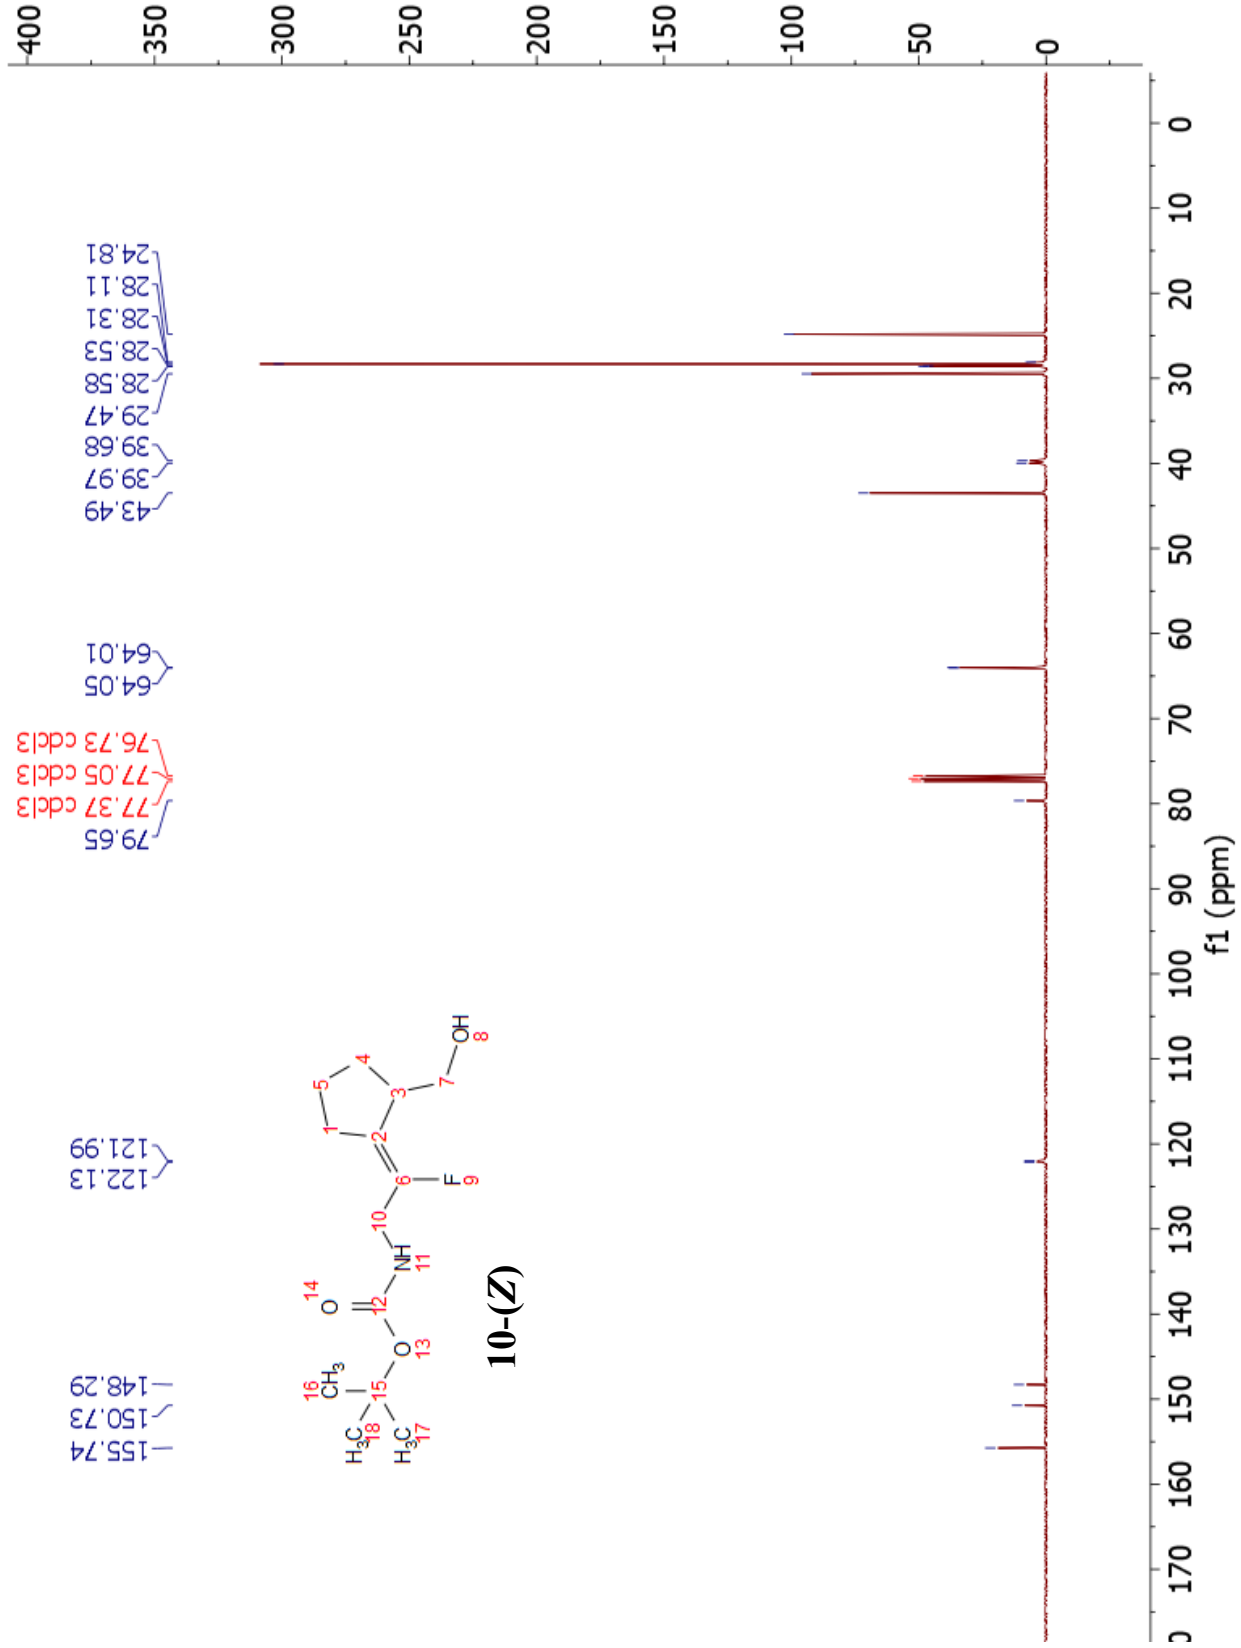

10-(Z)



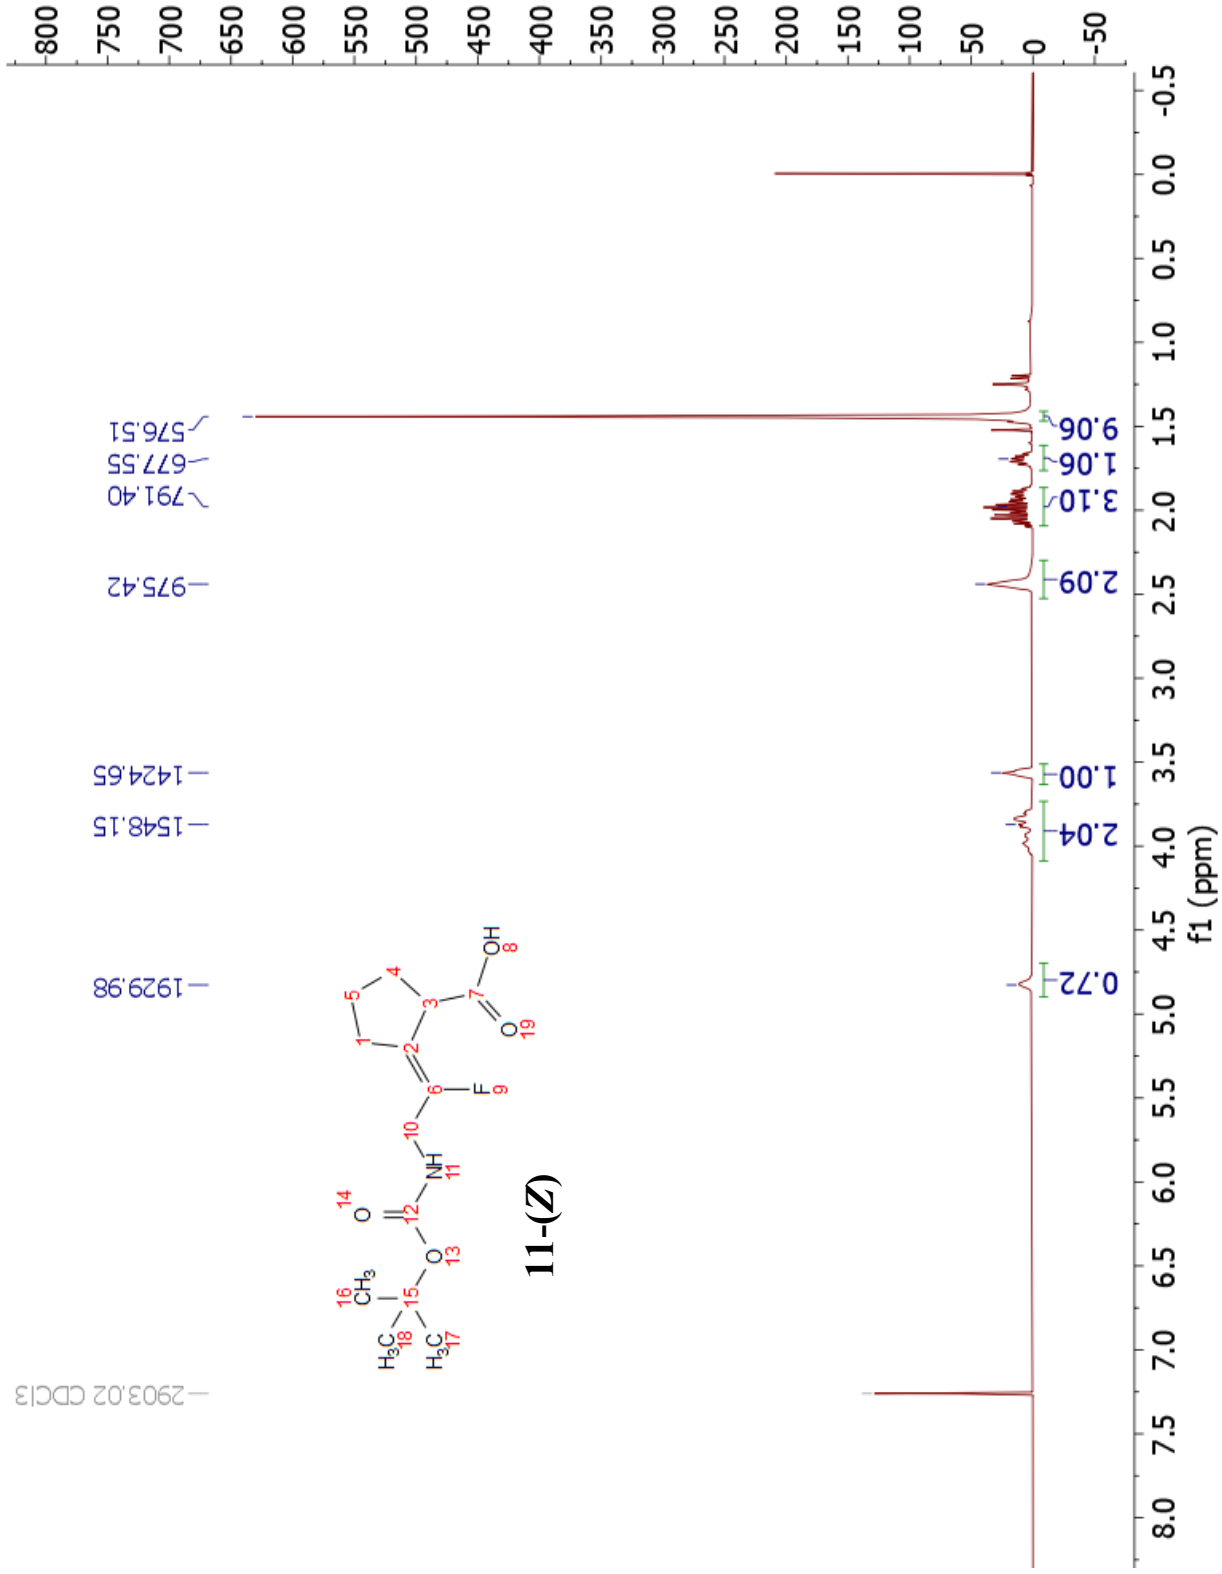

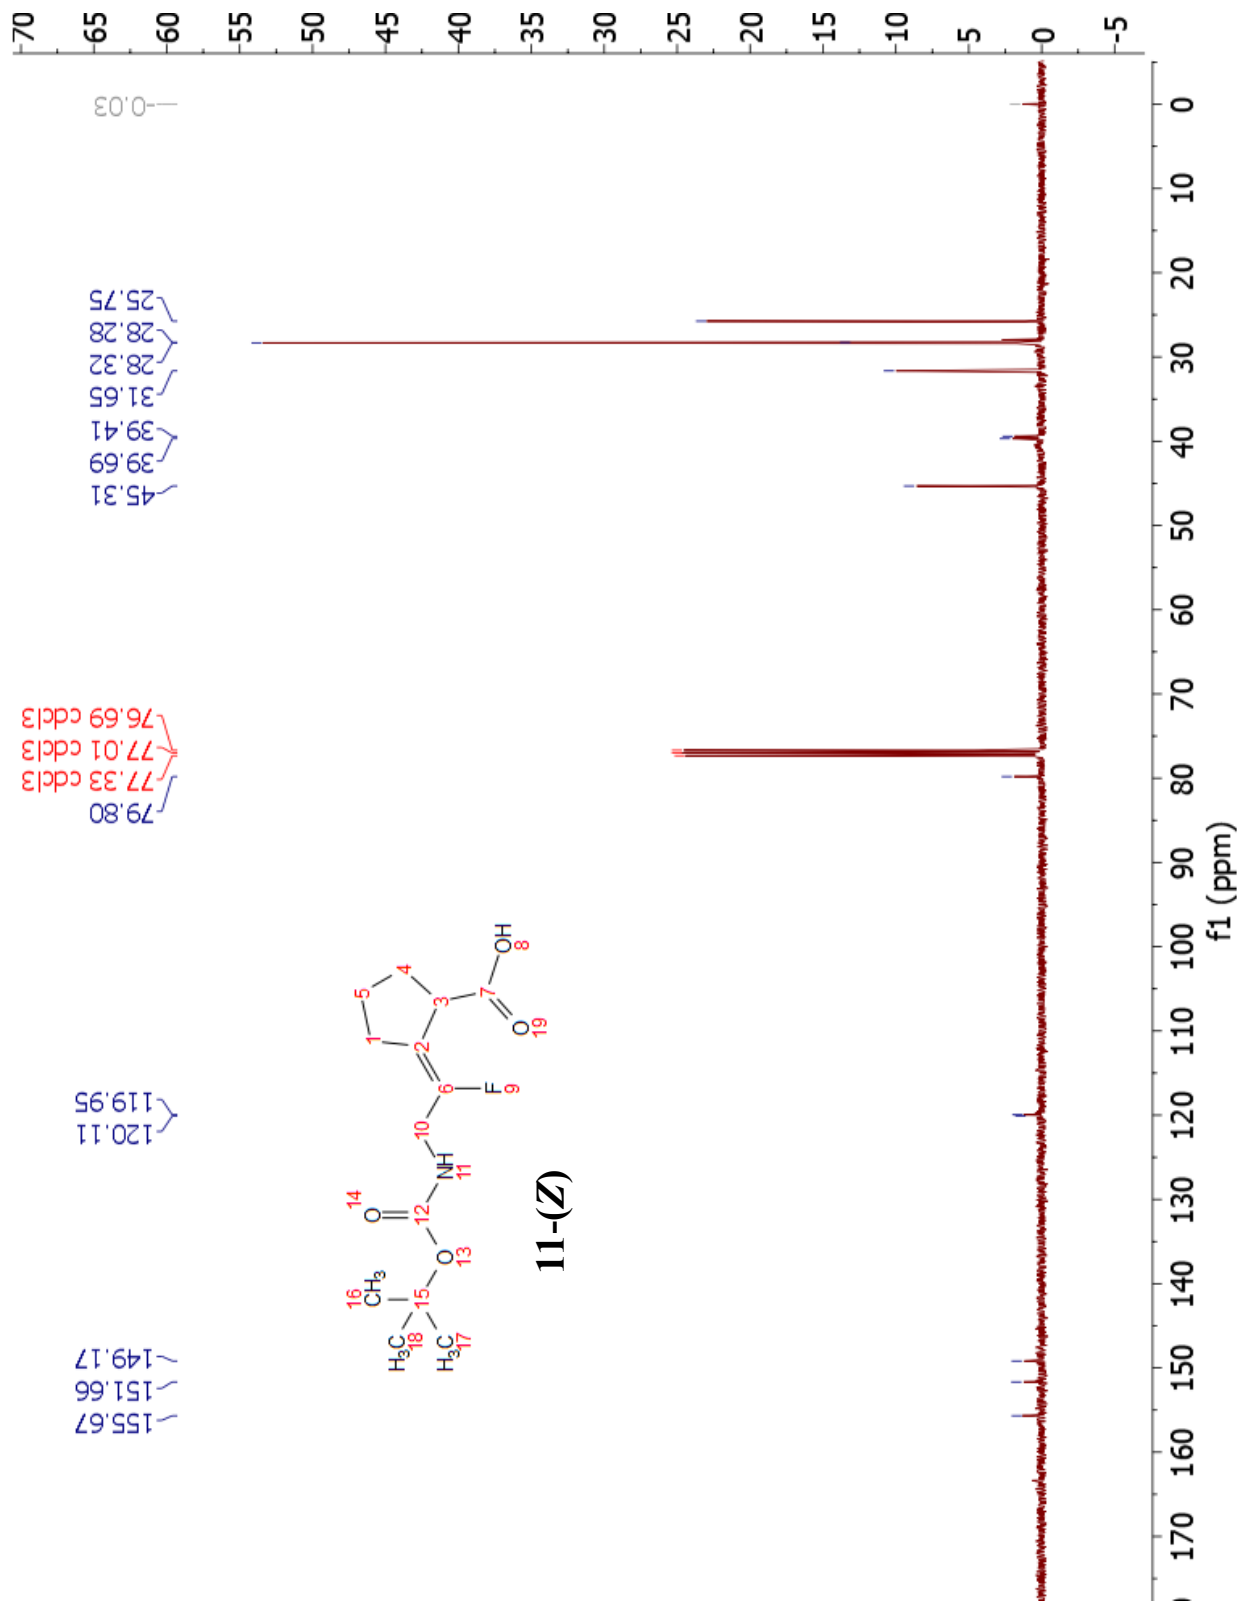

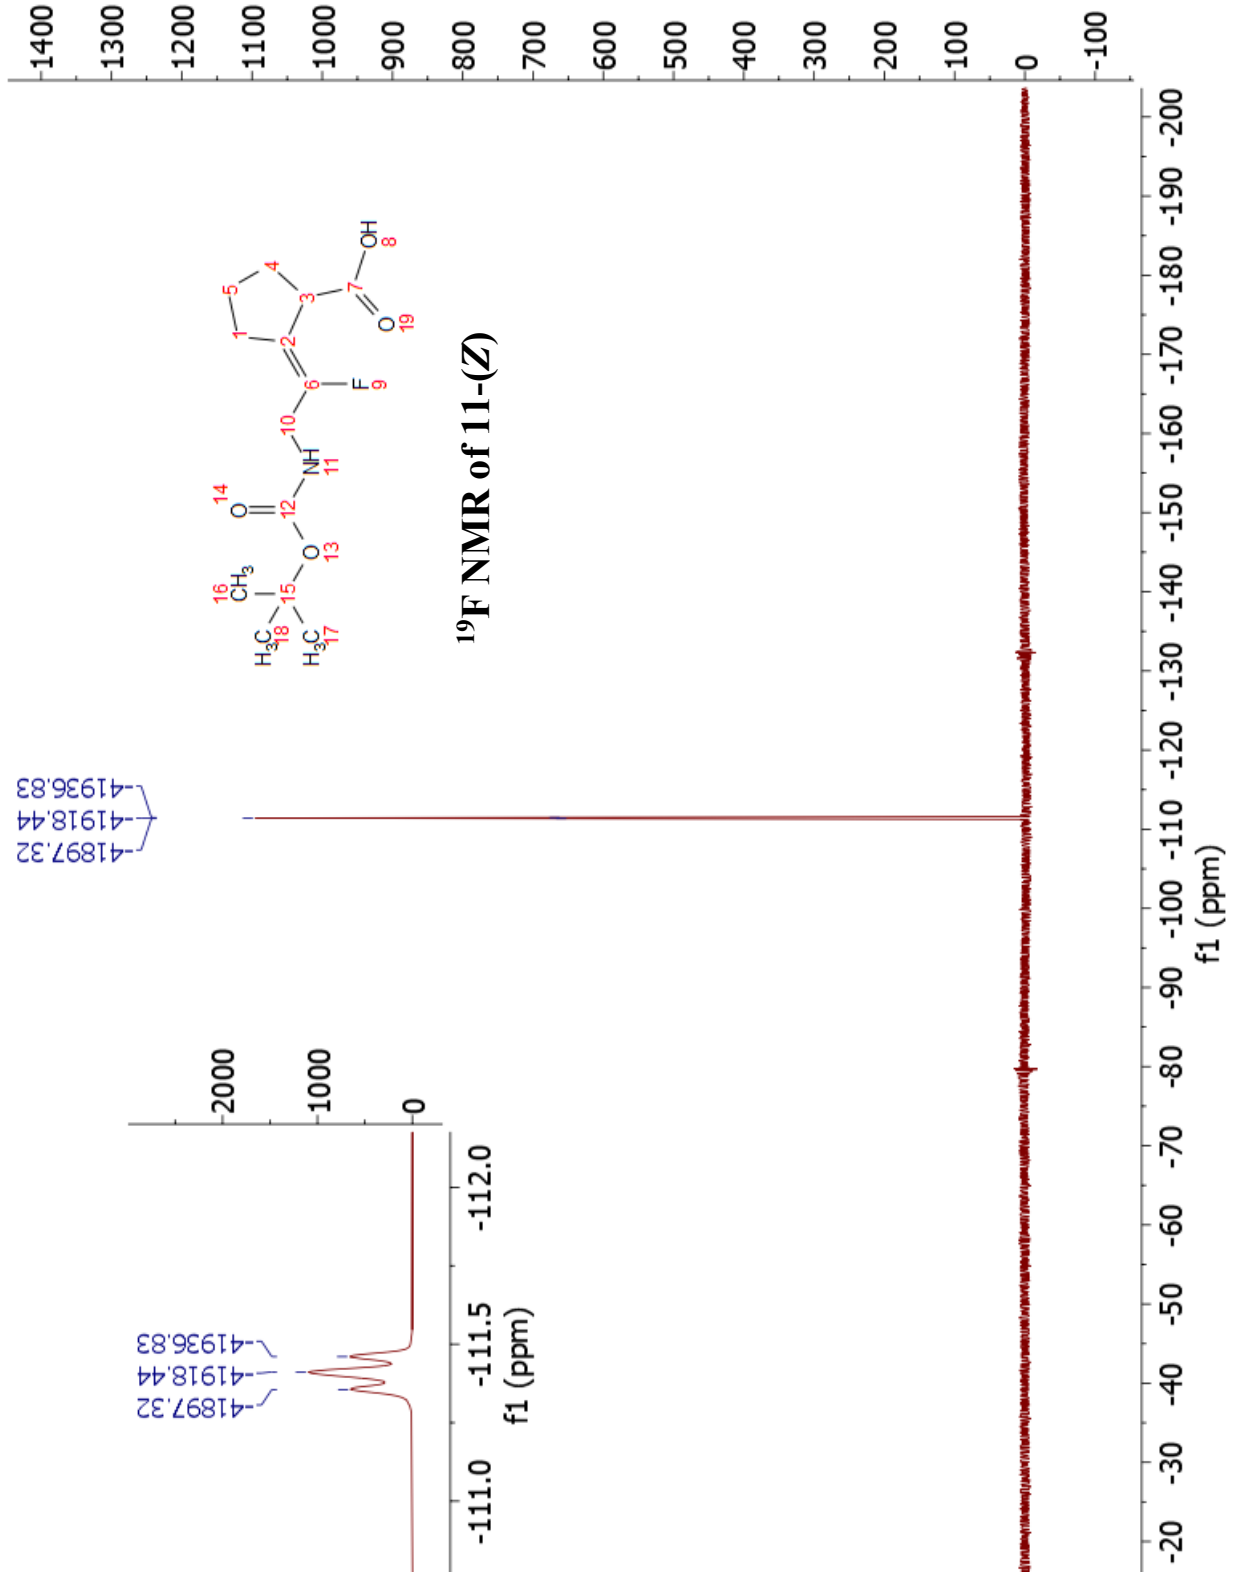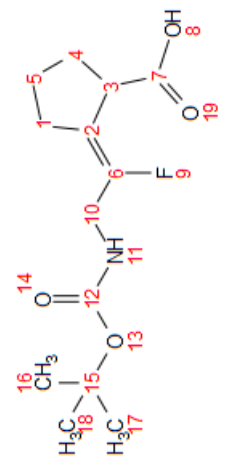

-41897.32  
-41918.44  
-41936.83

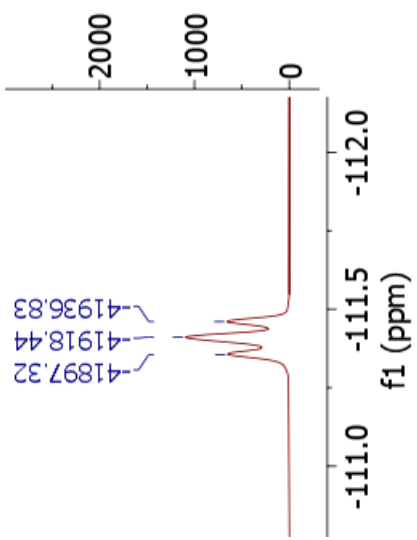

-41897.32  
-41918.44  
-41936.83

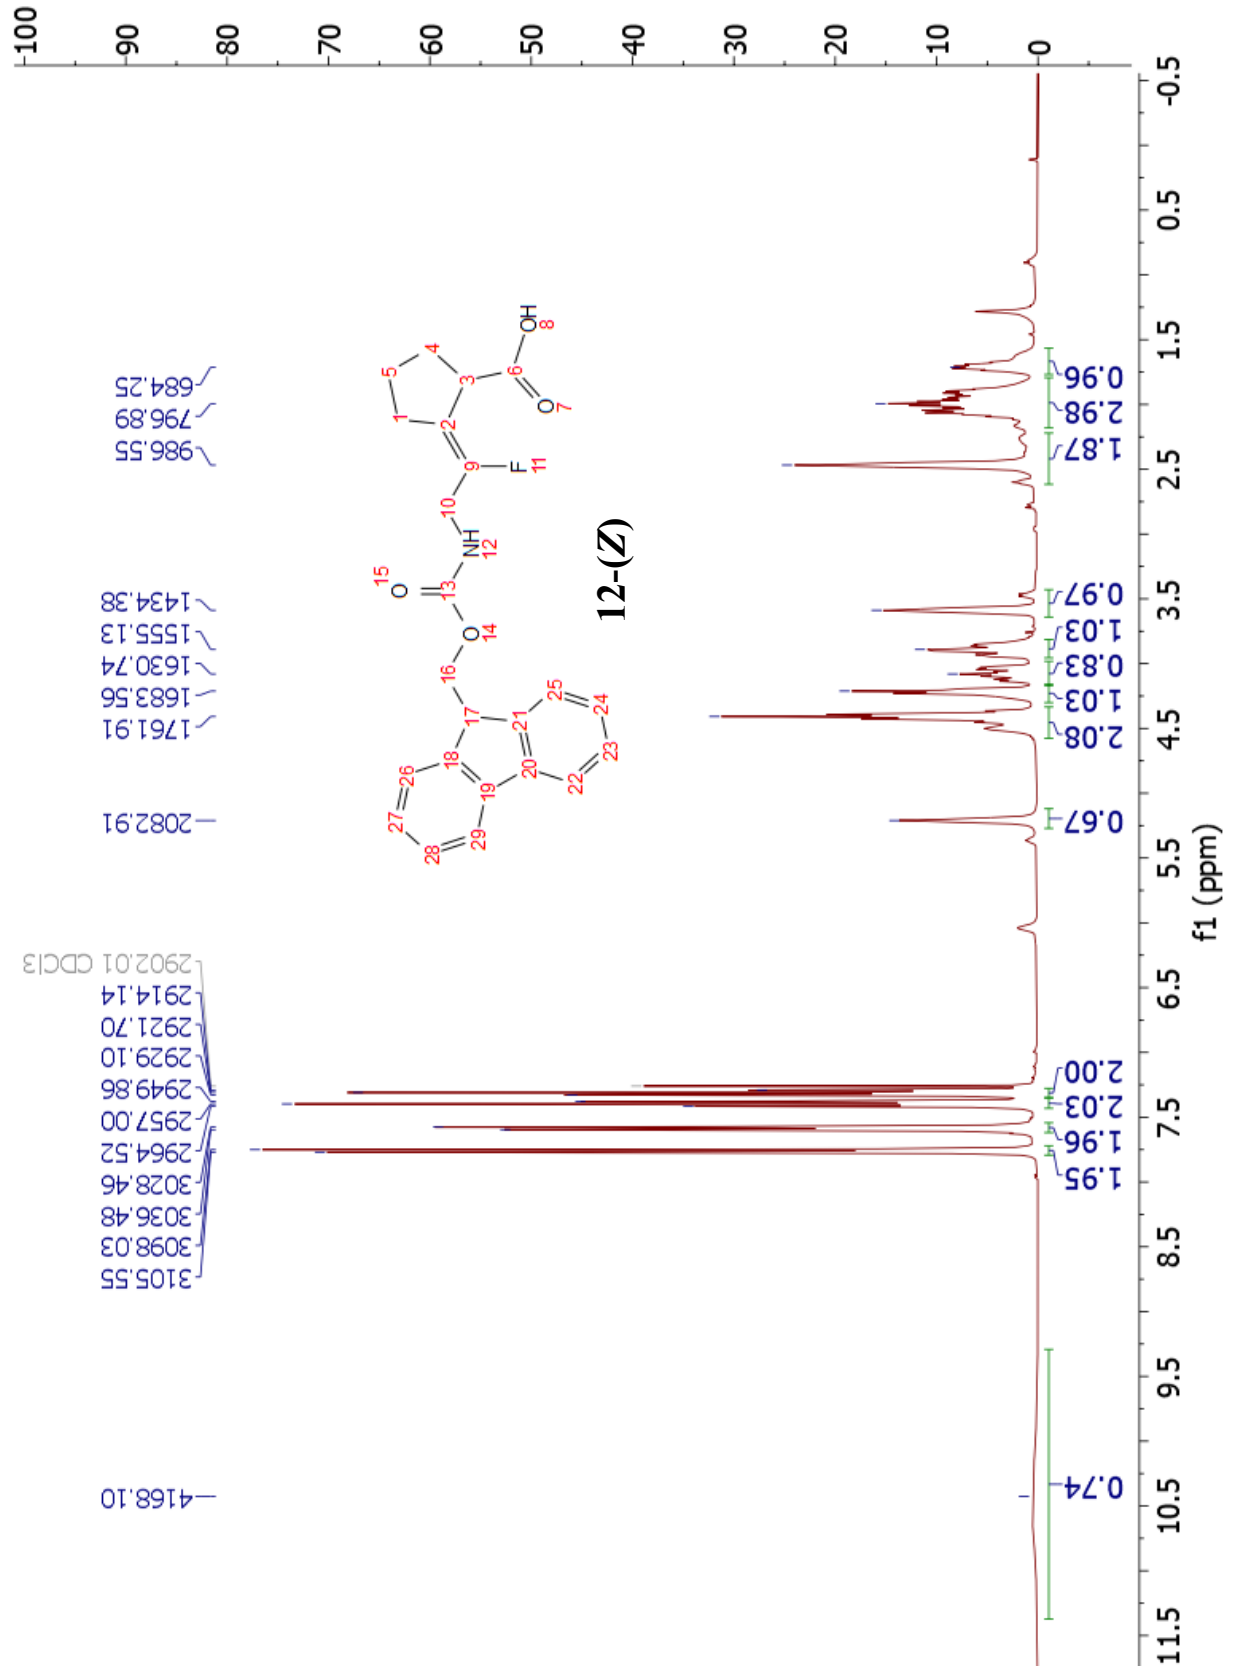

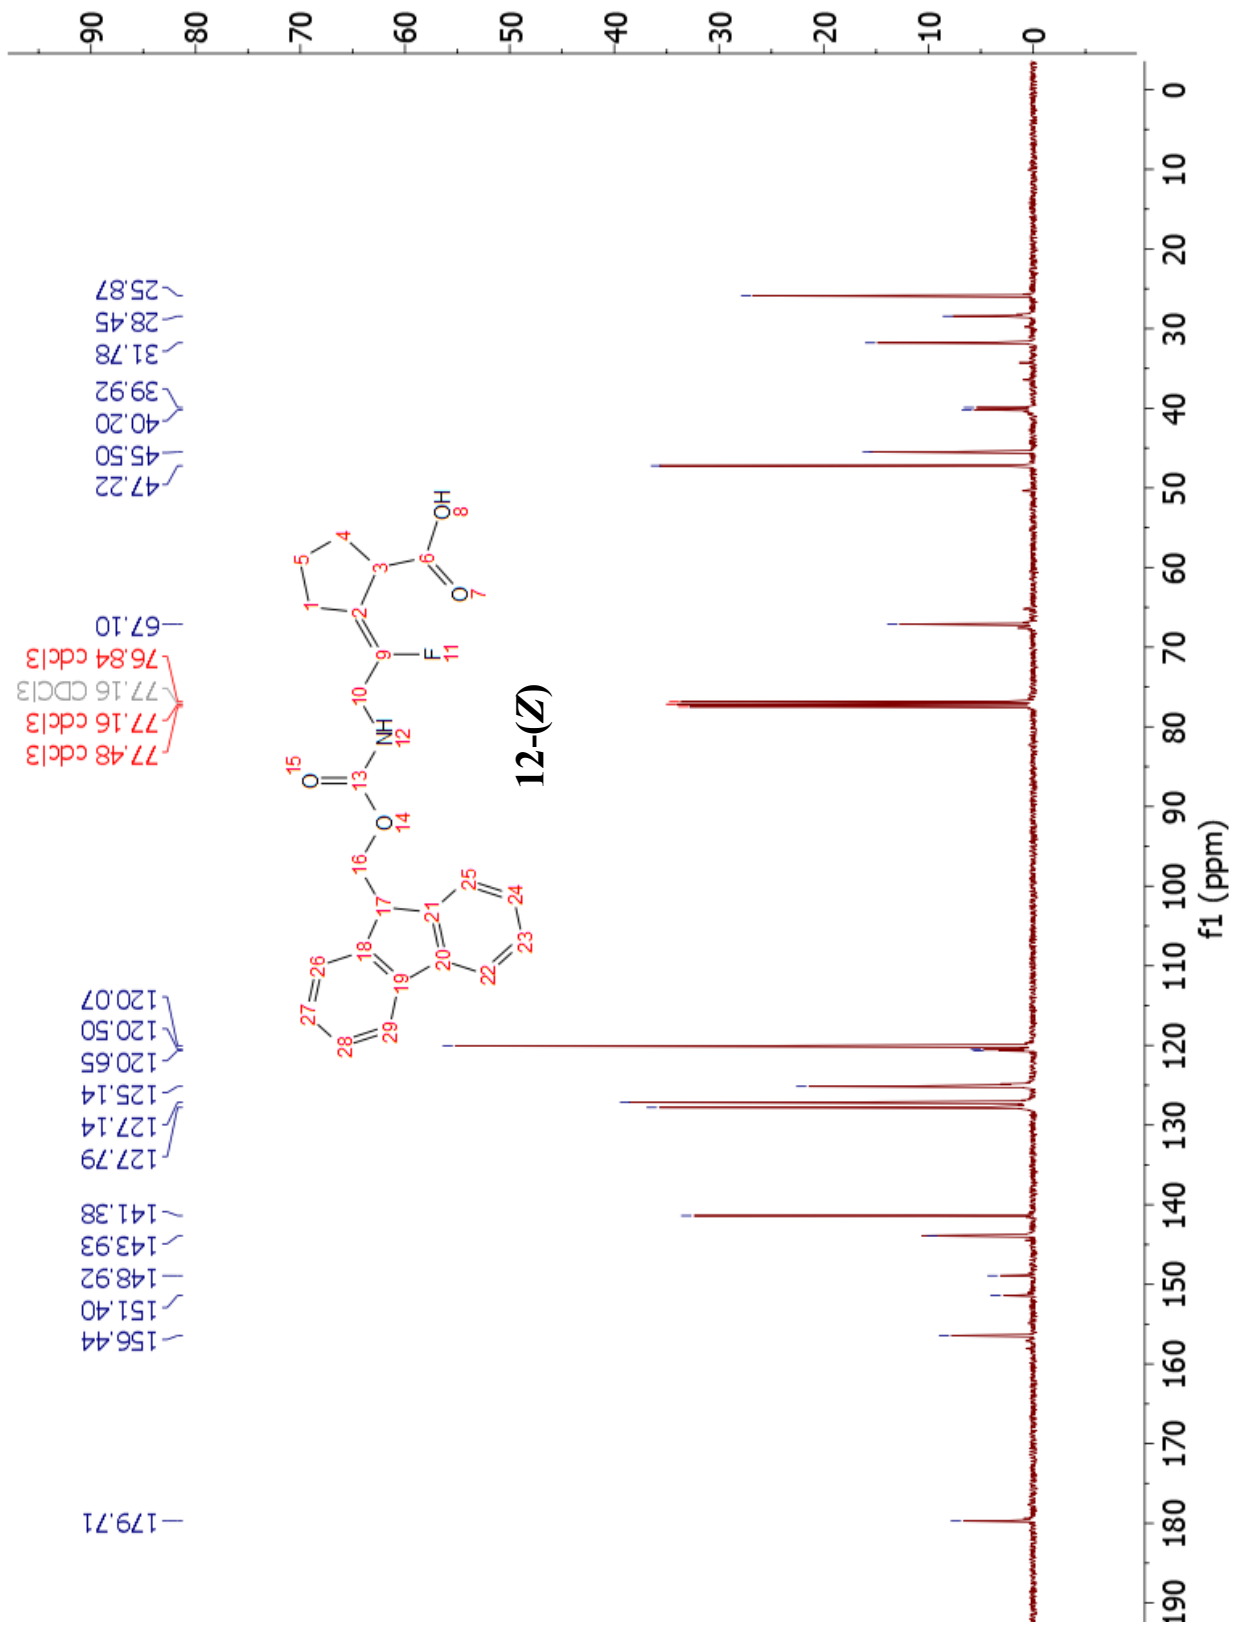

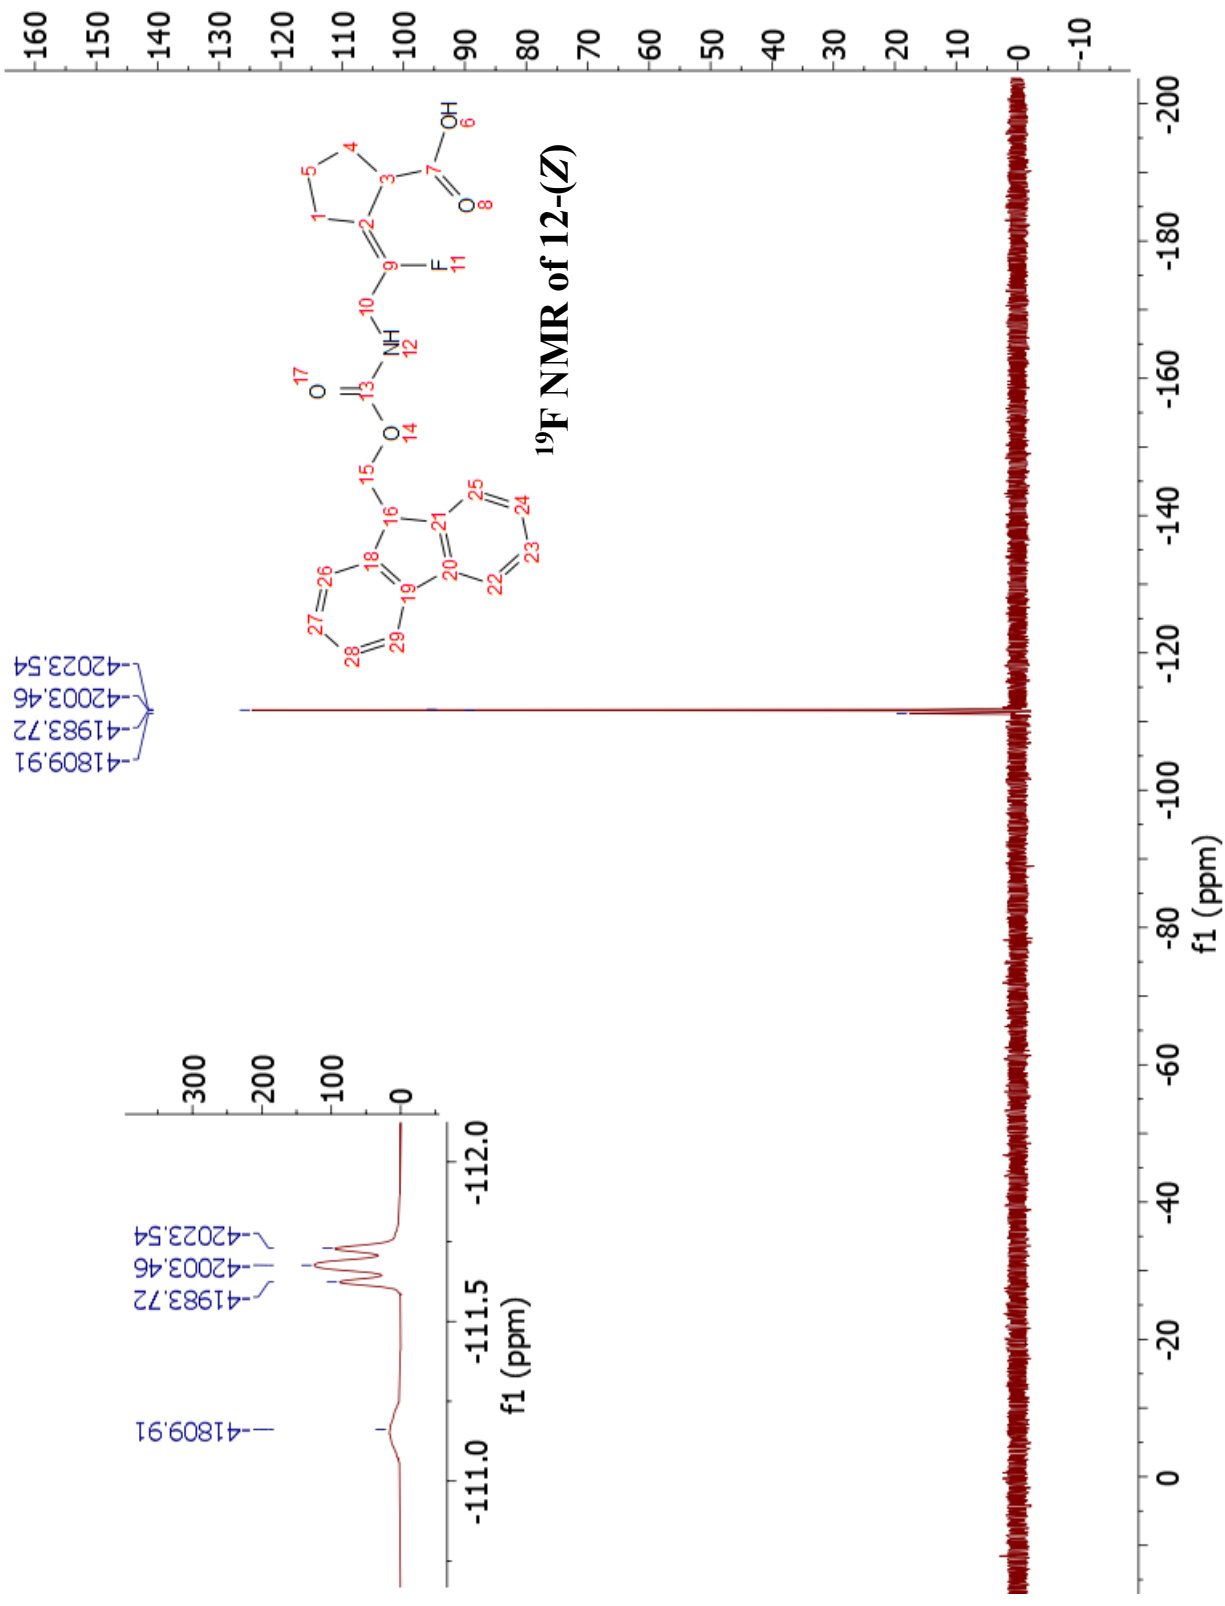



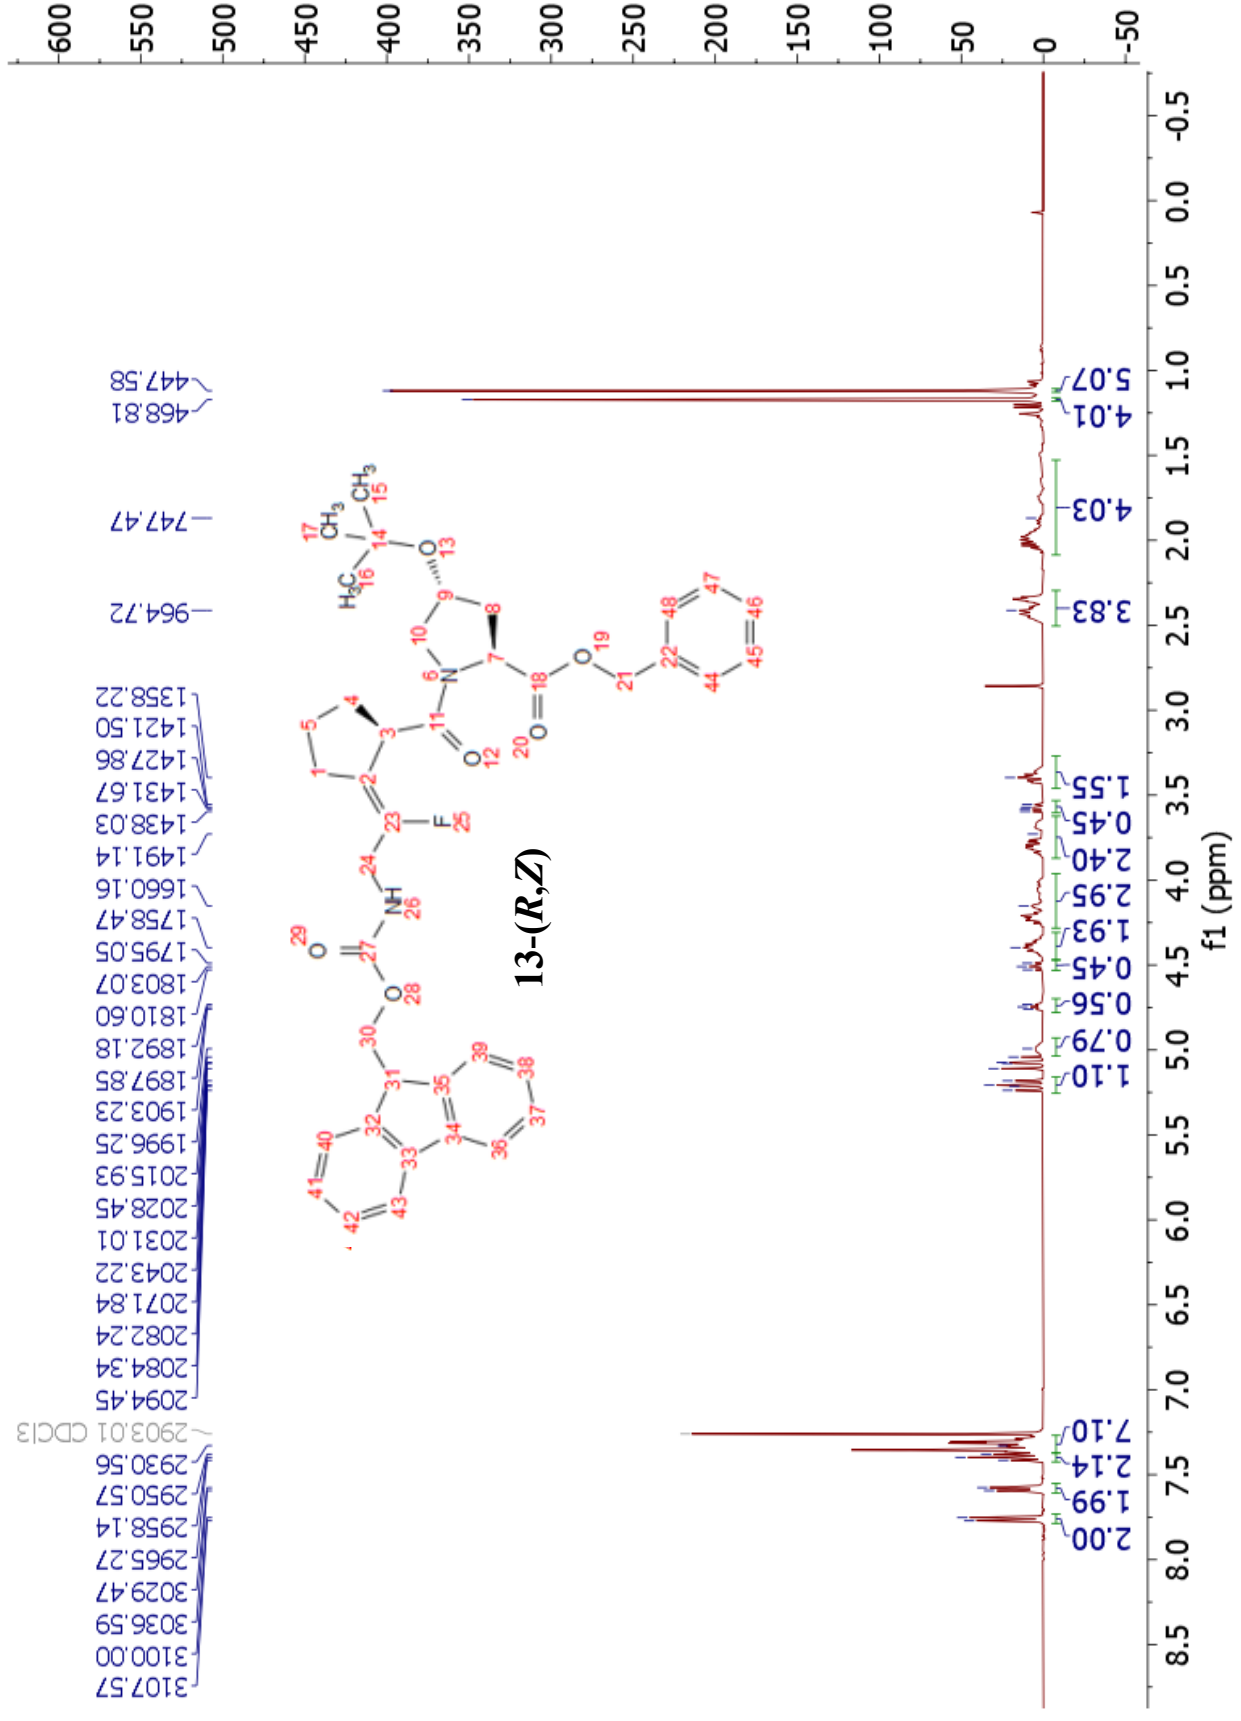

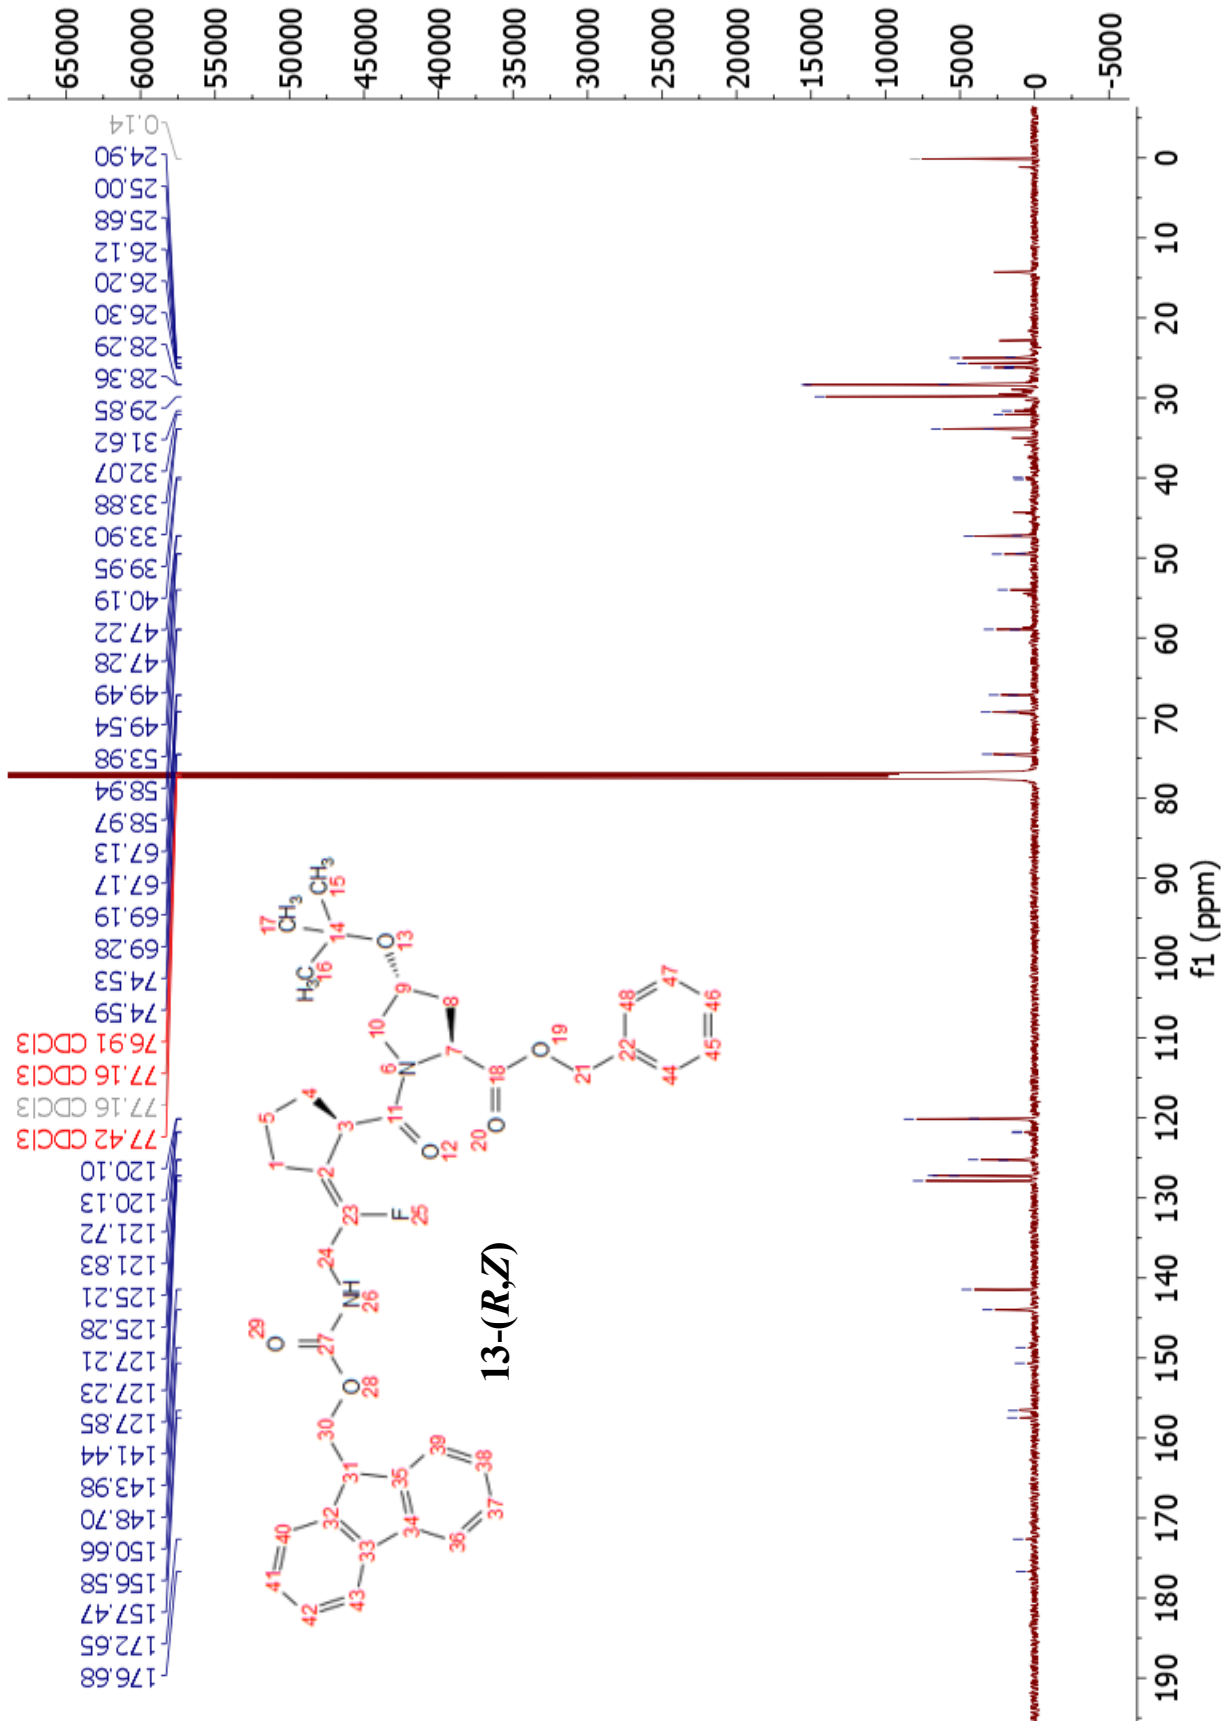

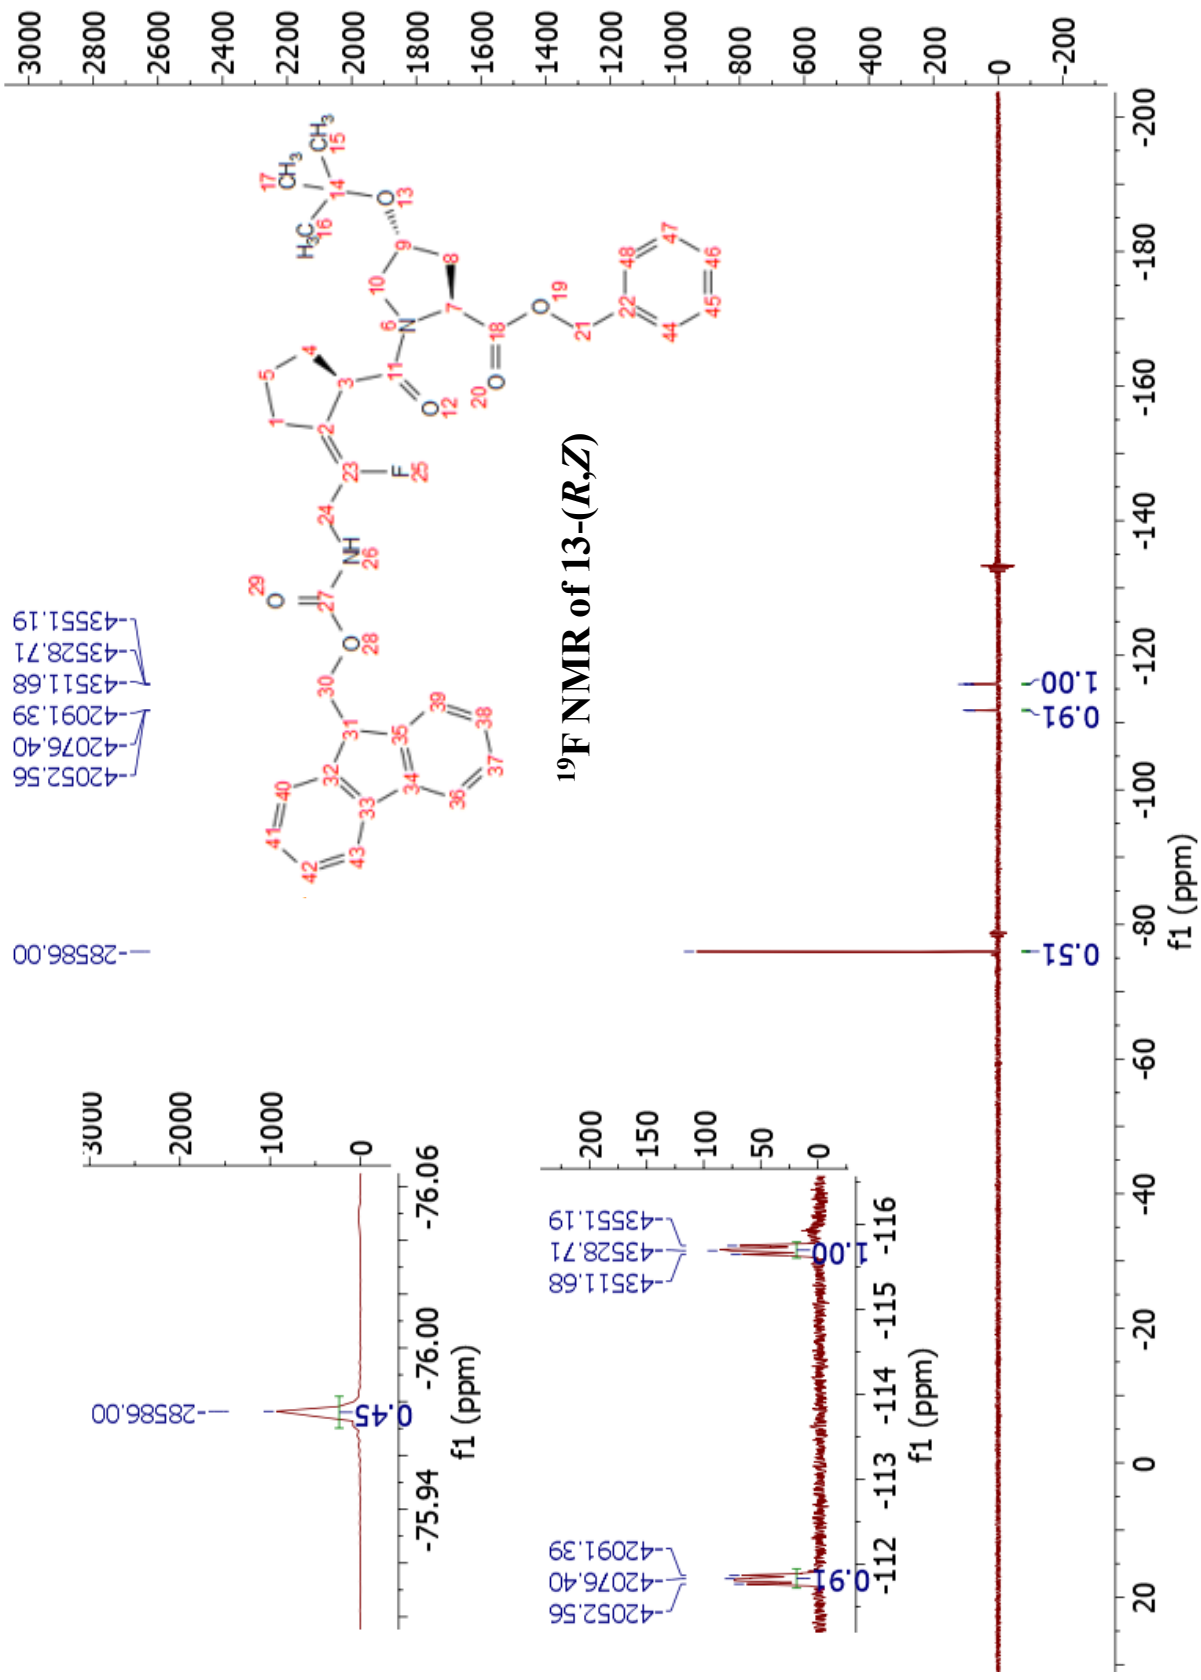



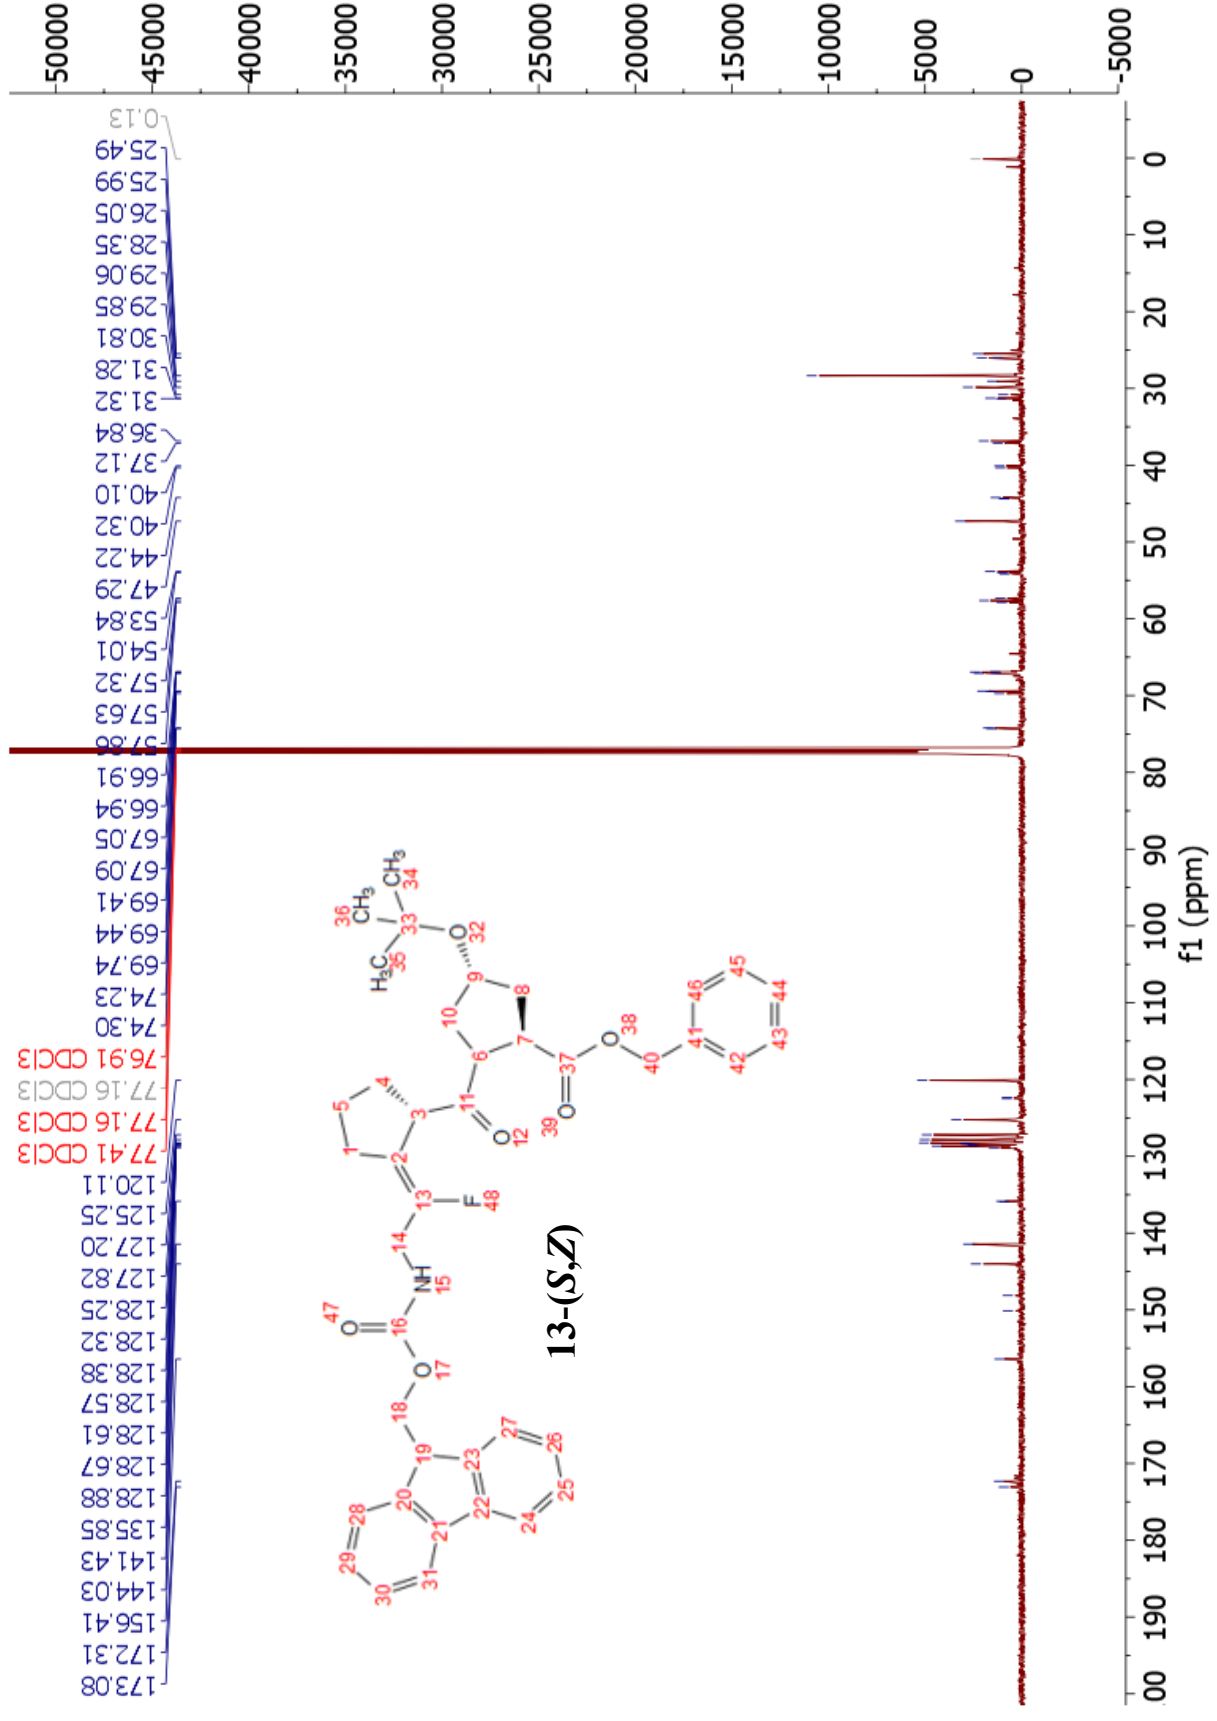

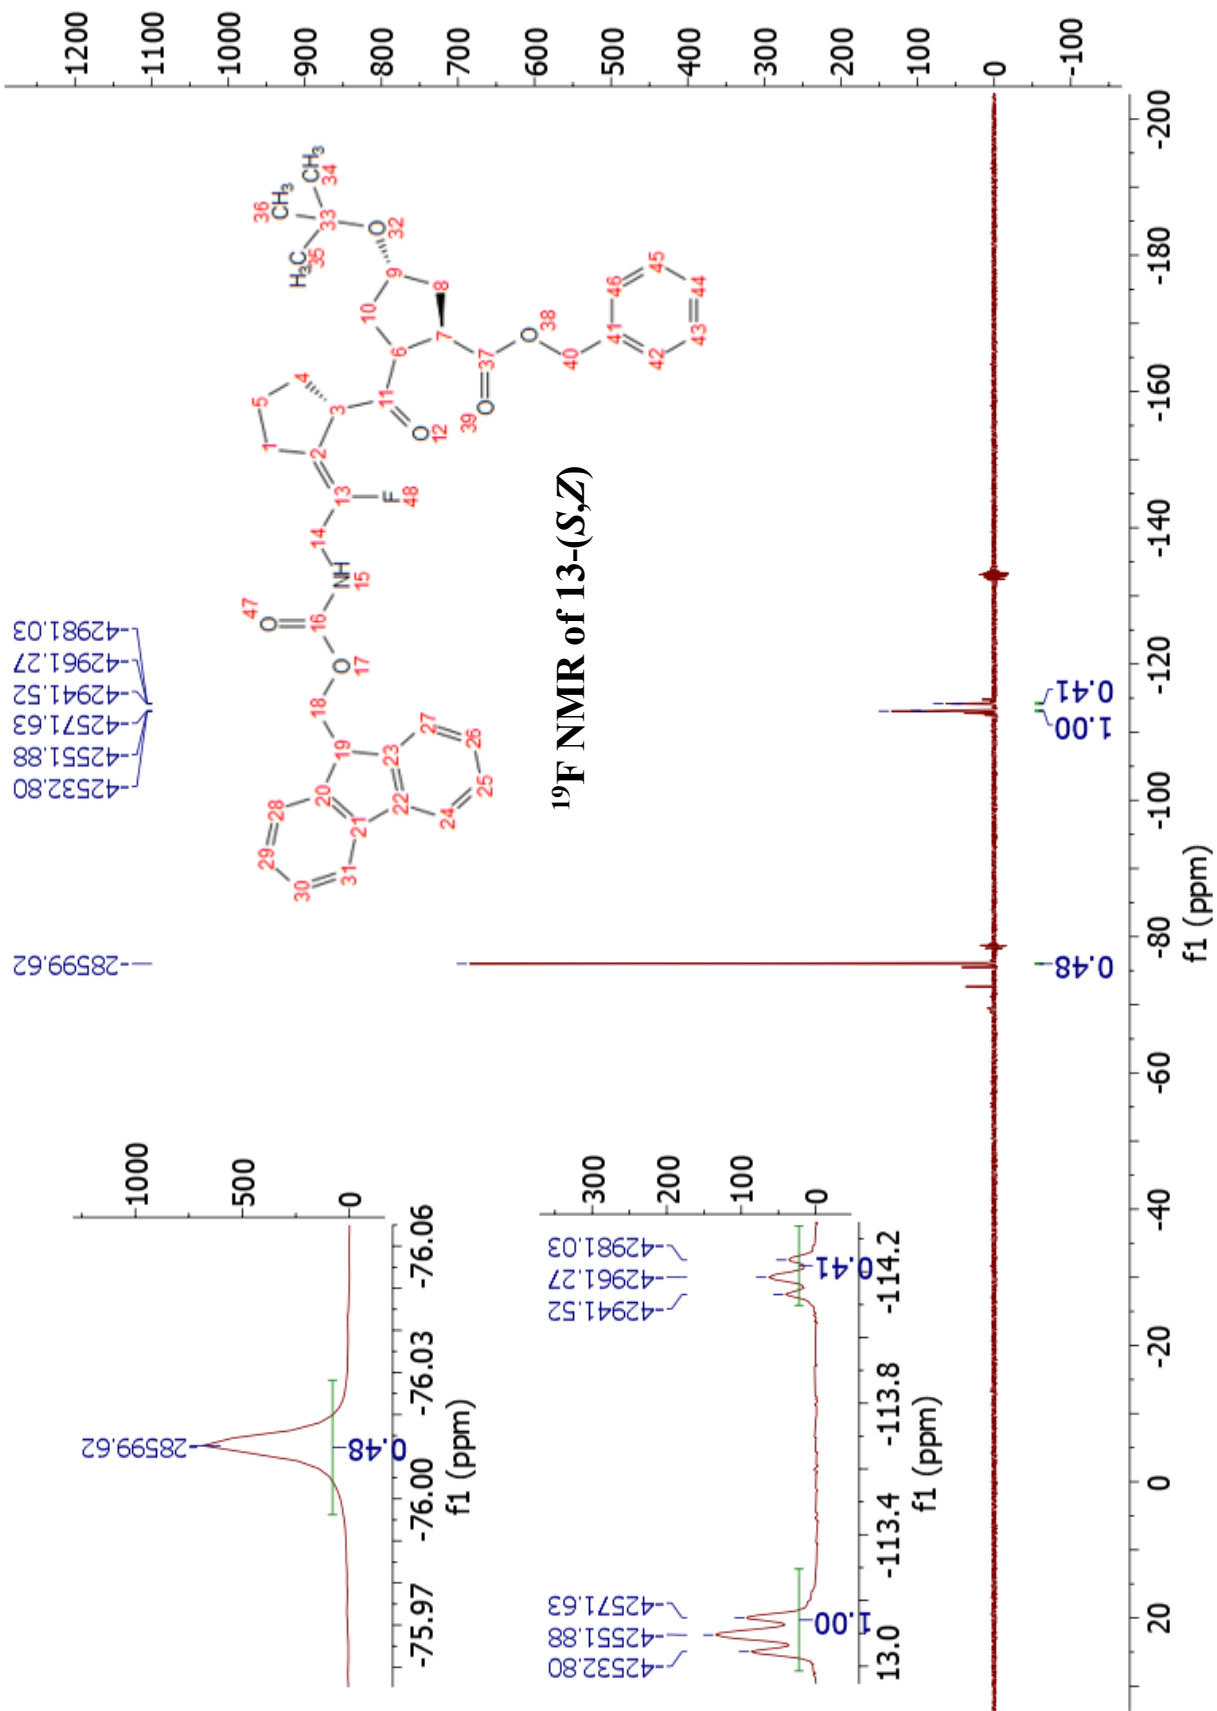

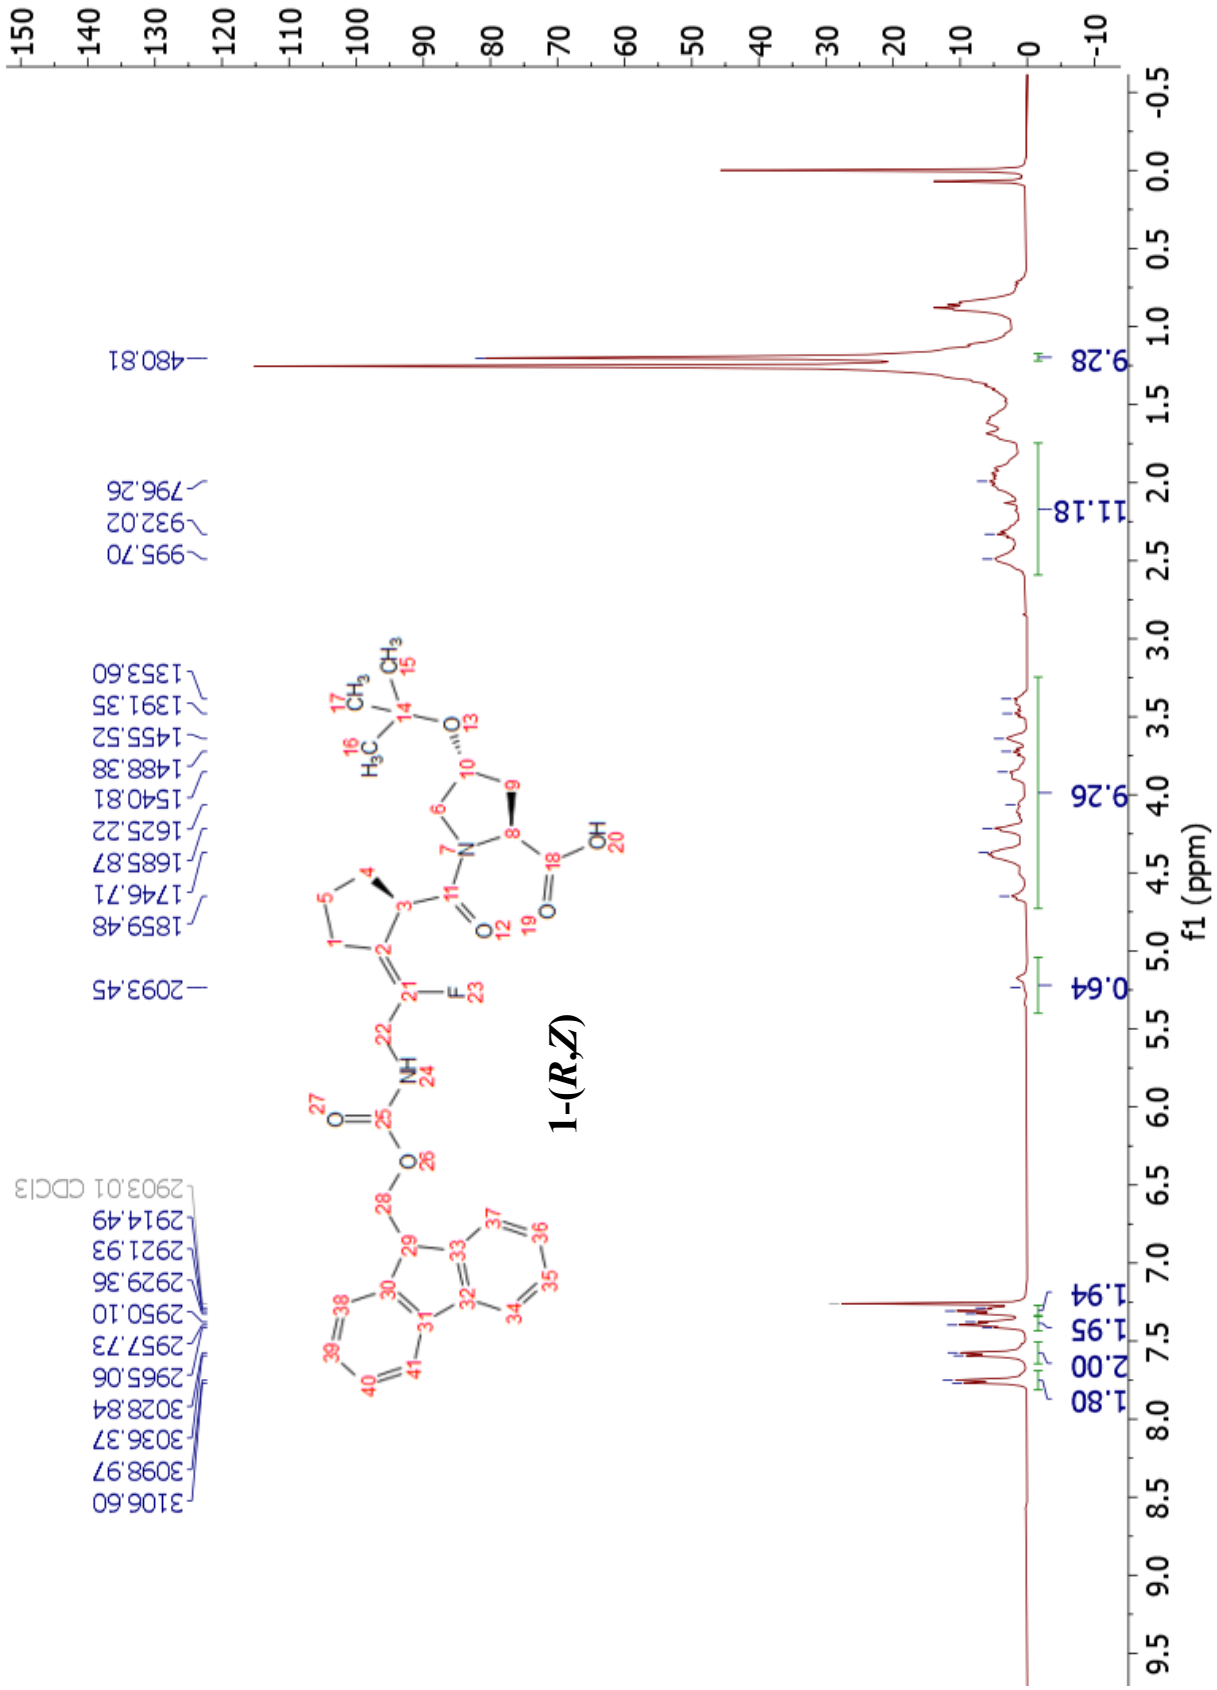

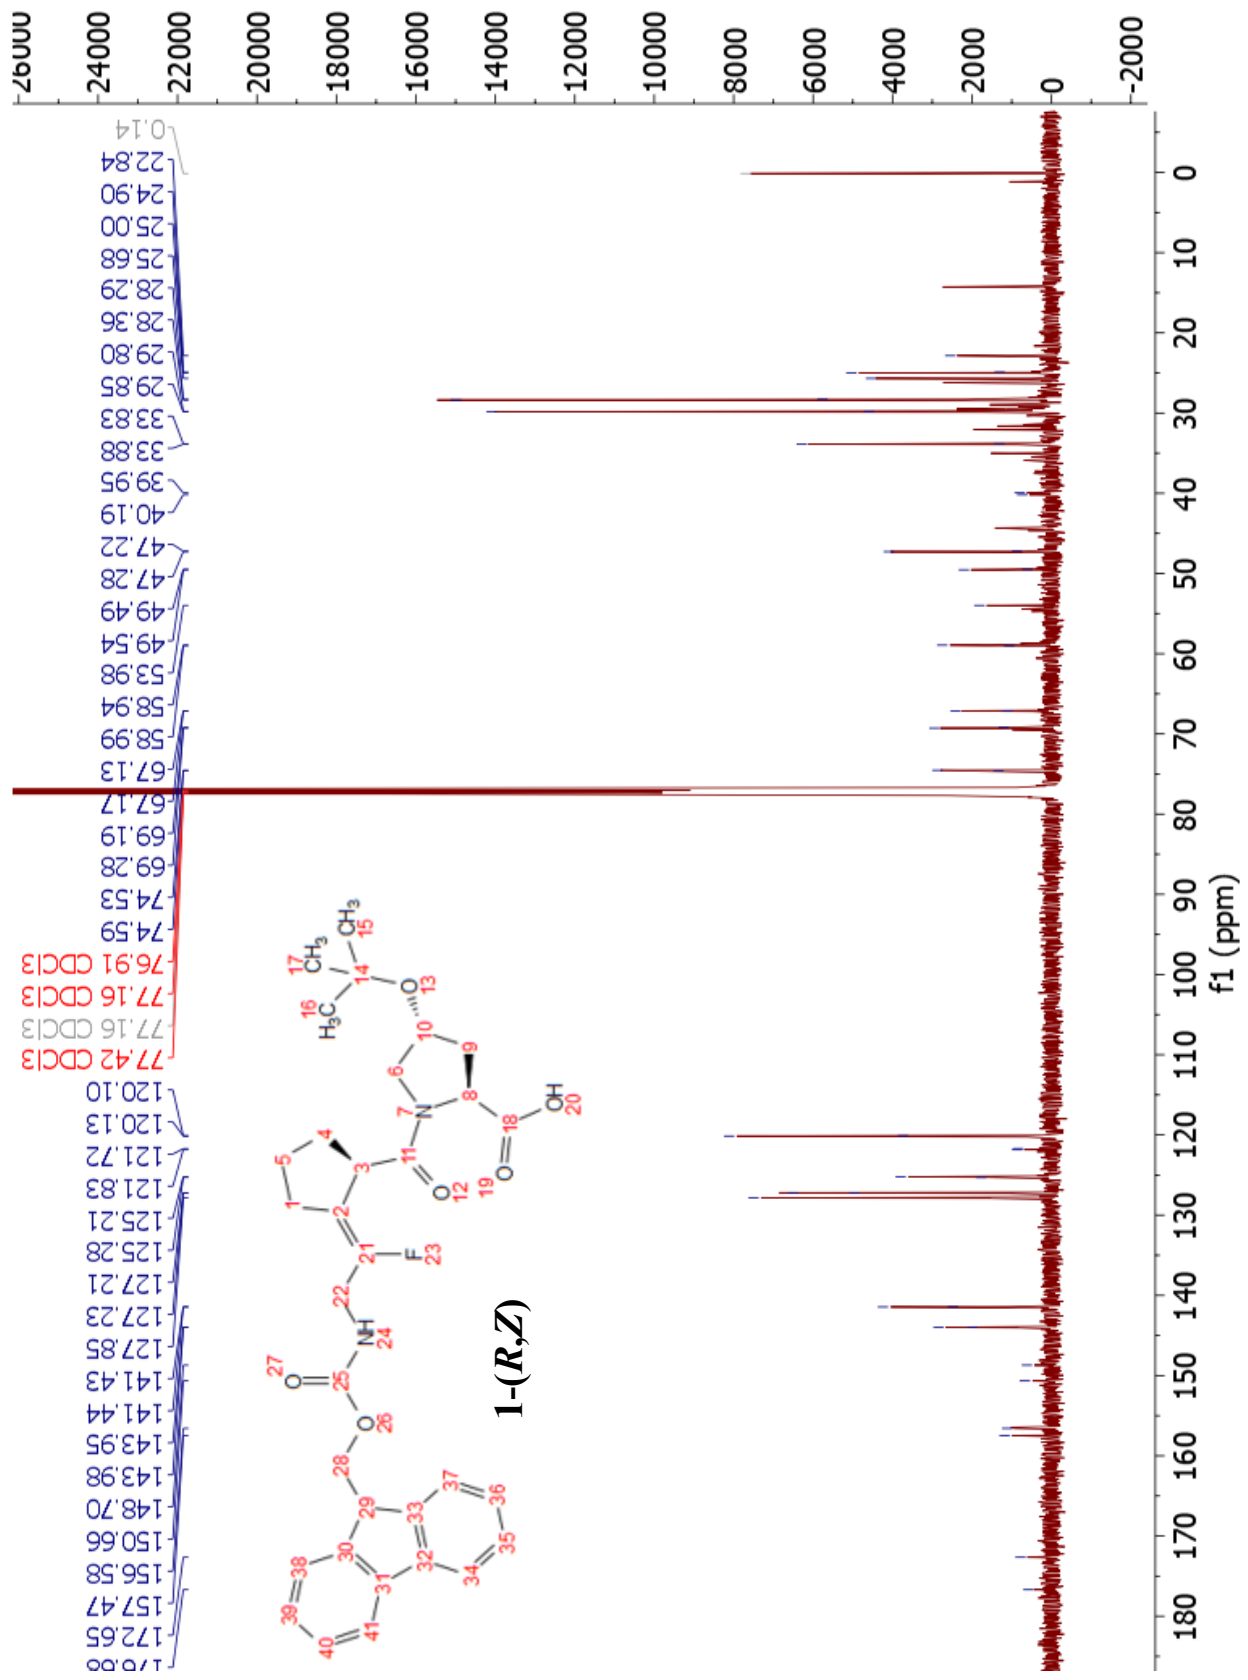



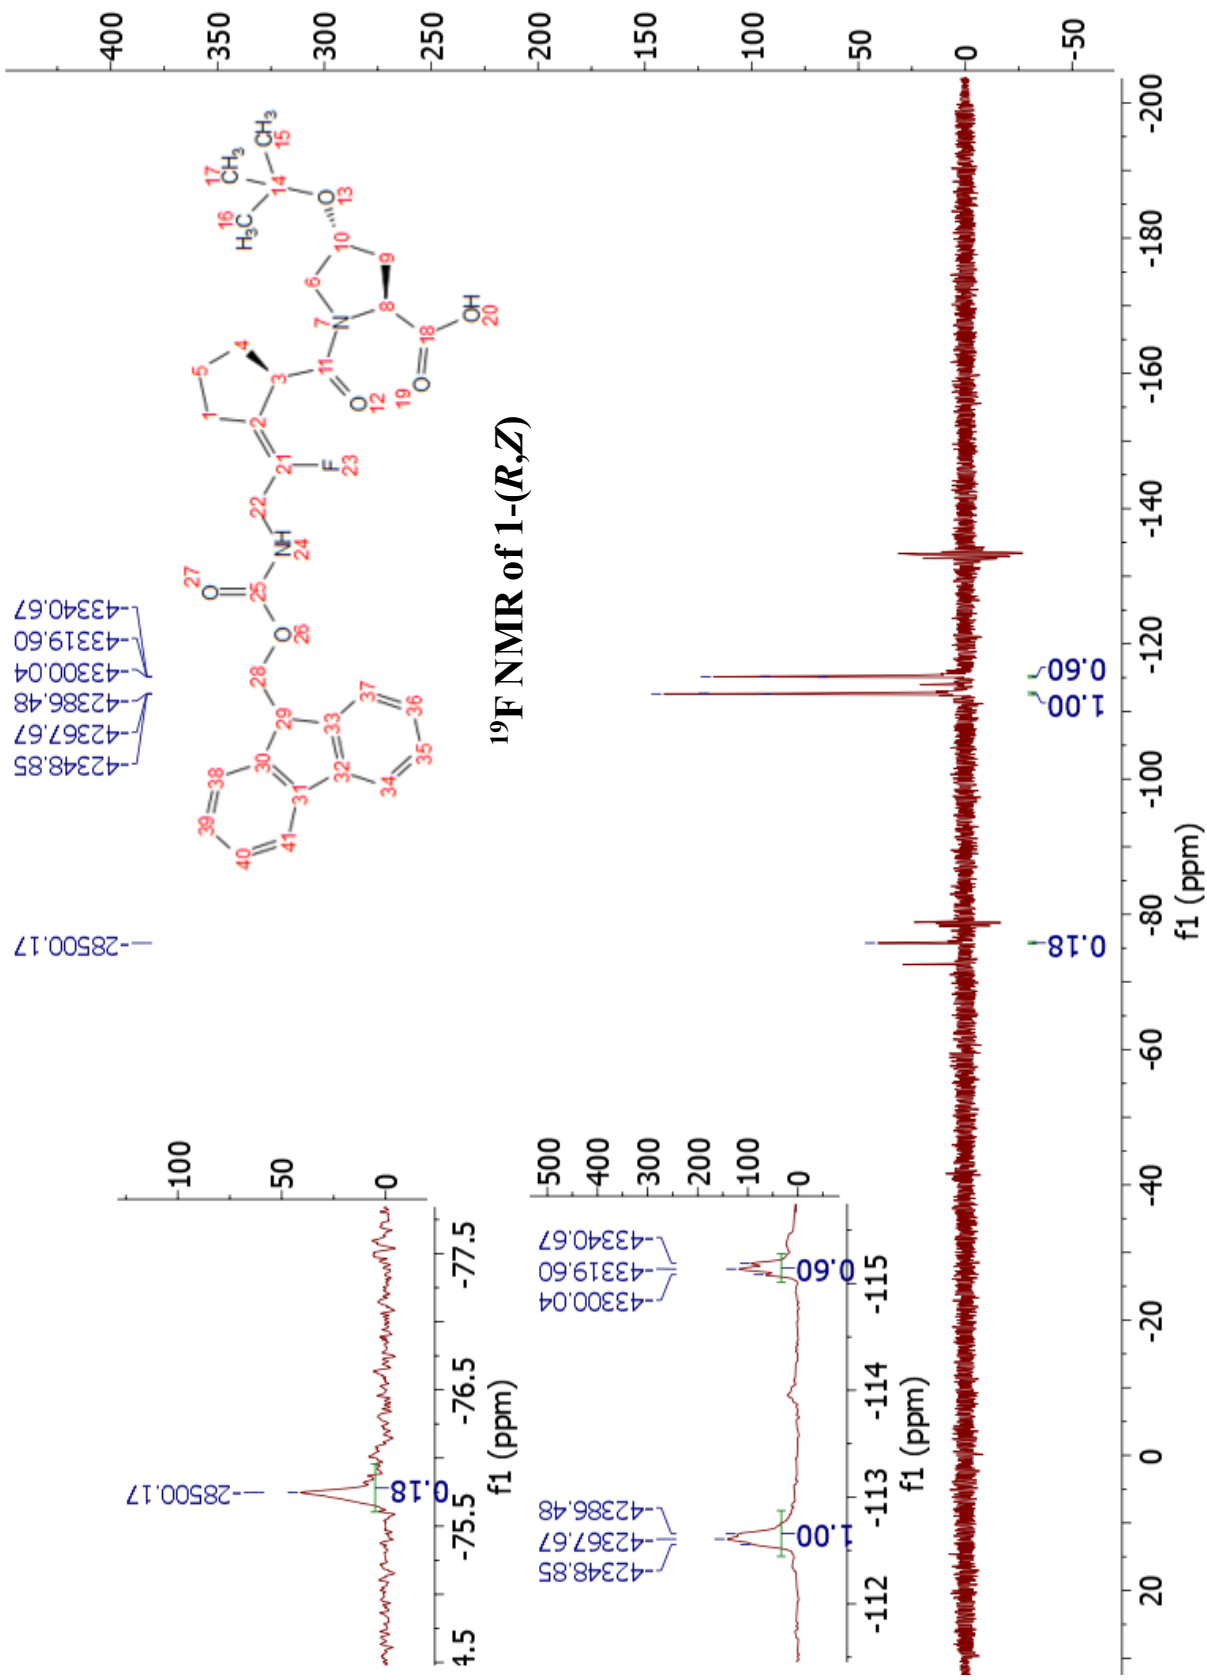

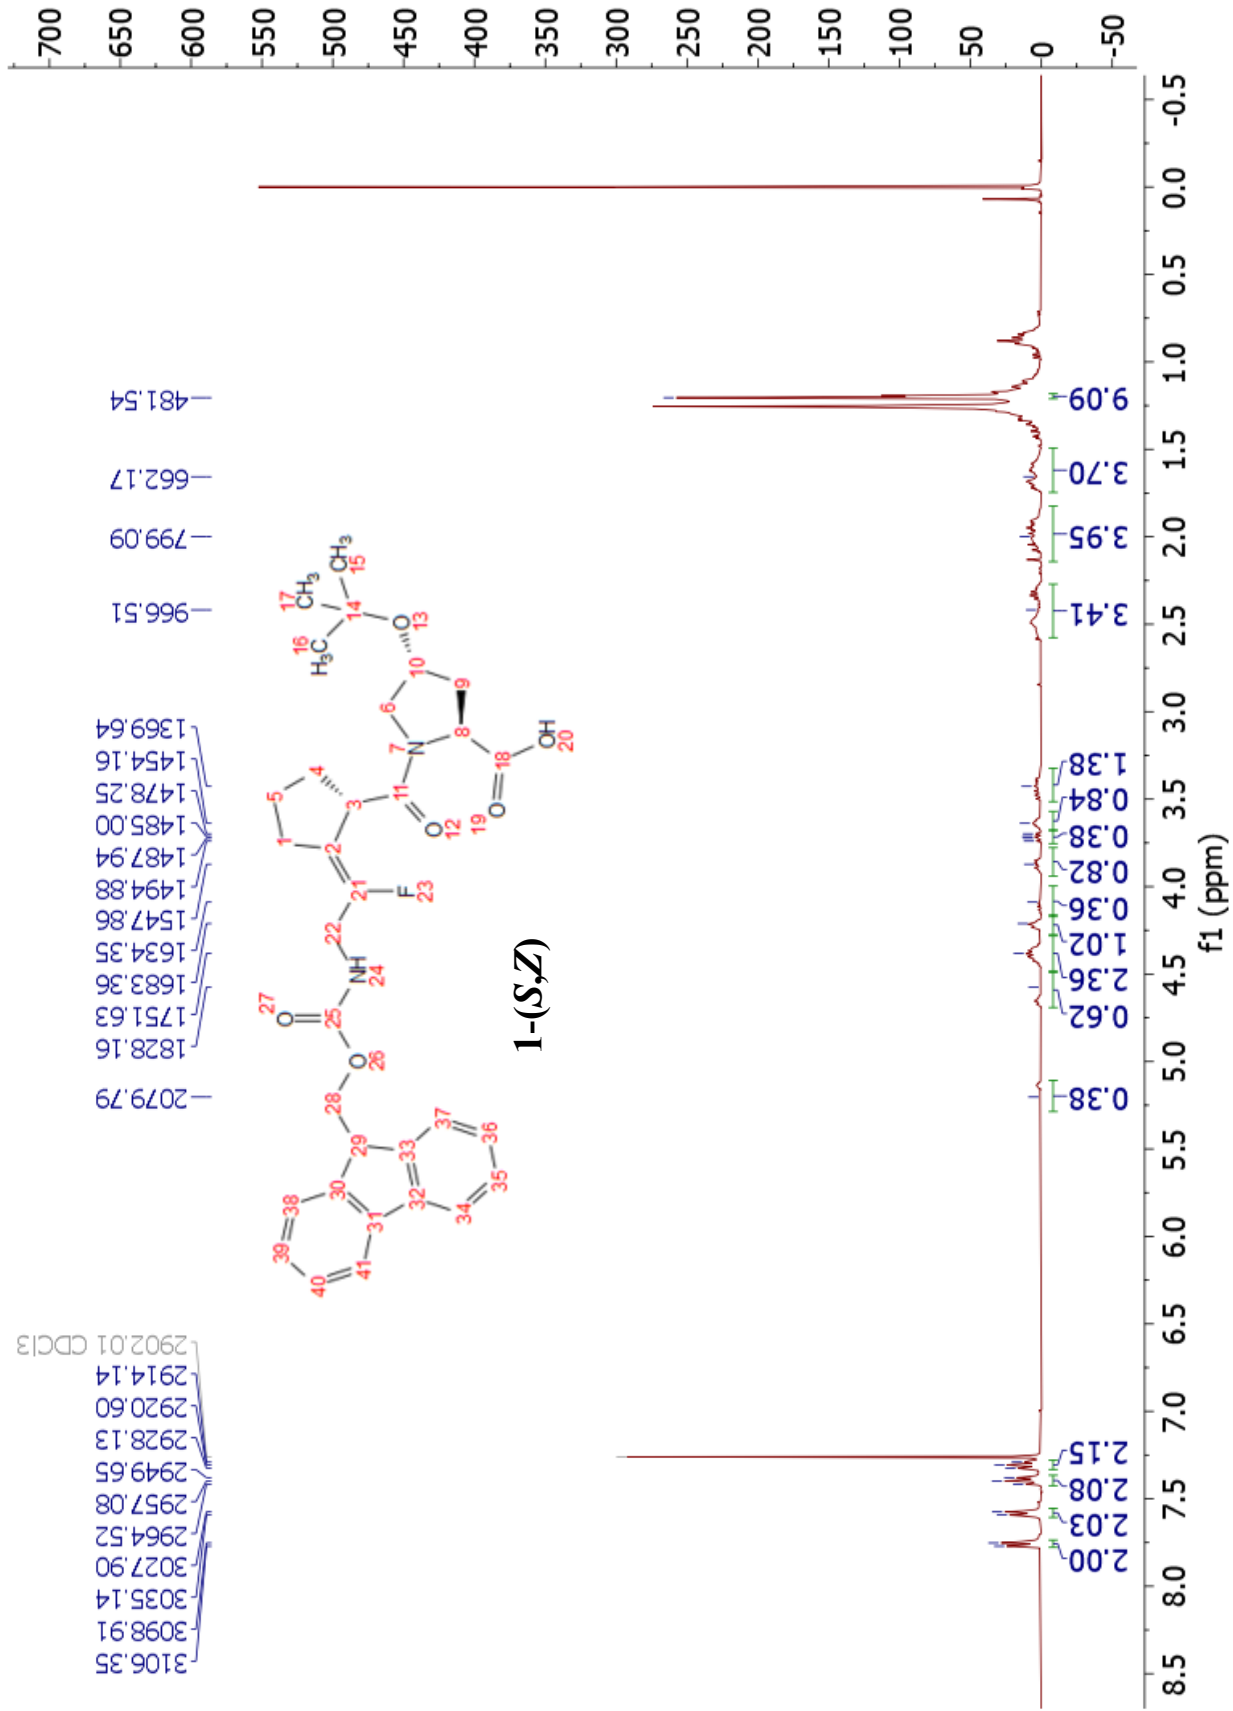

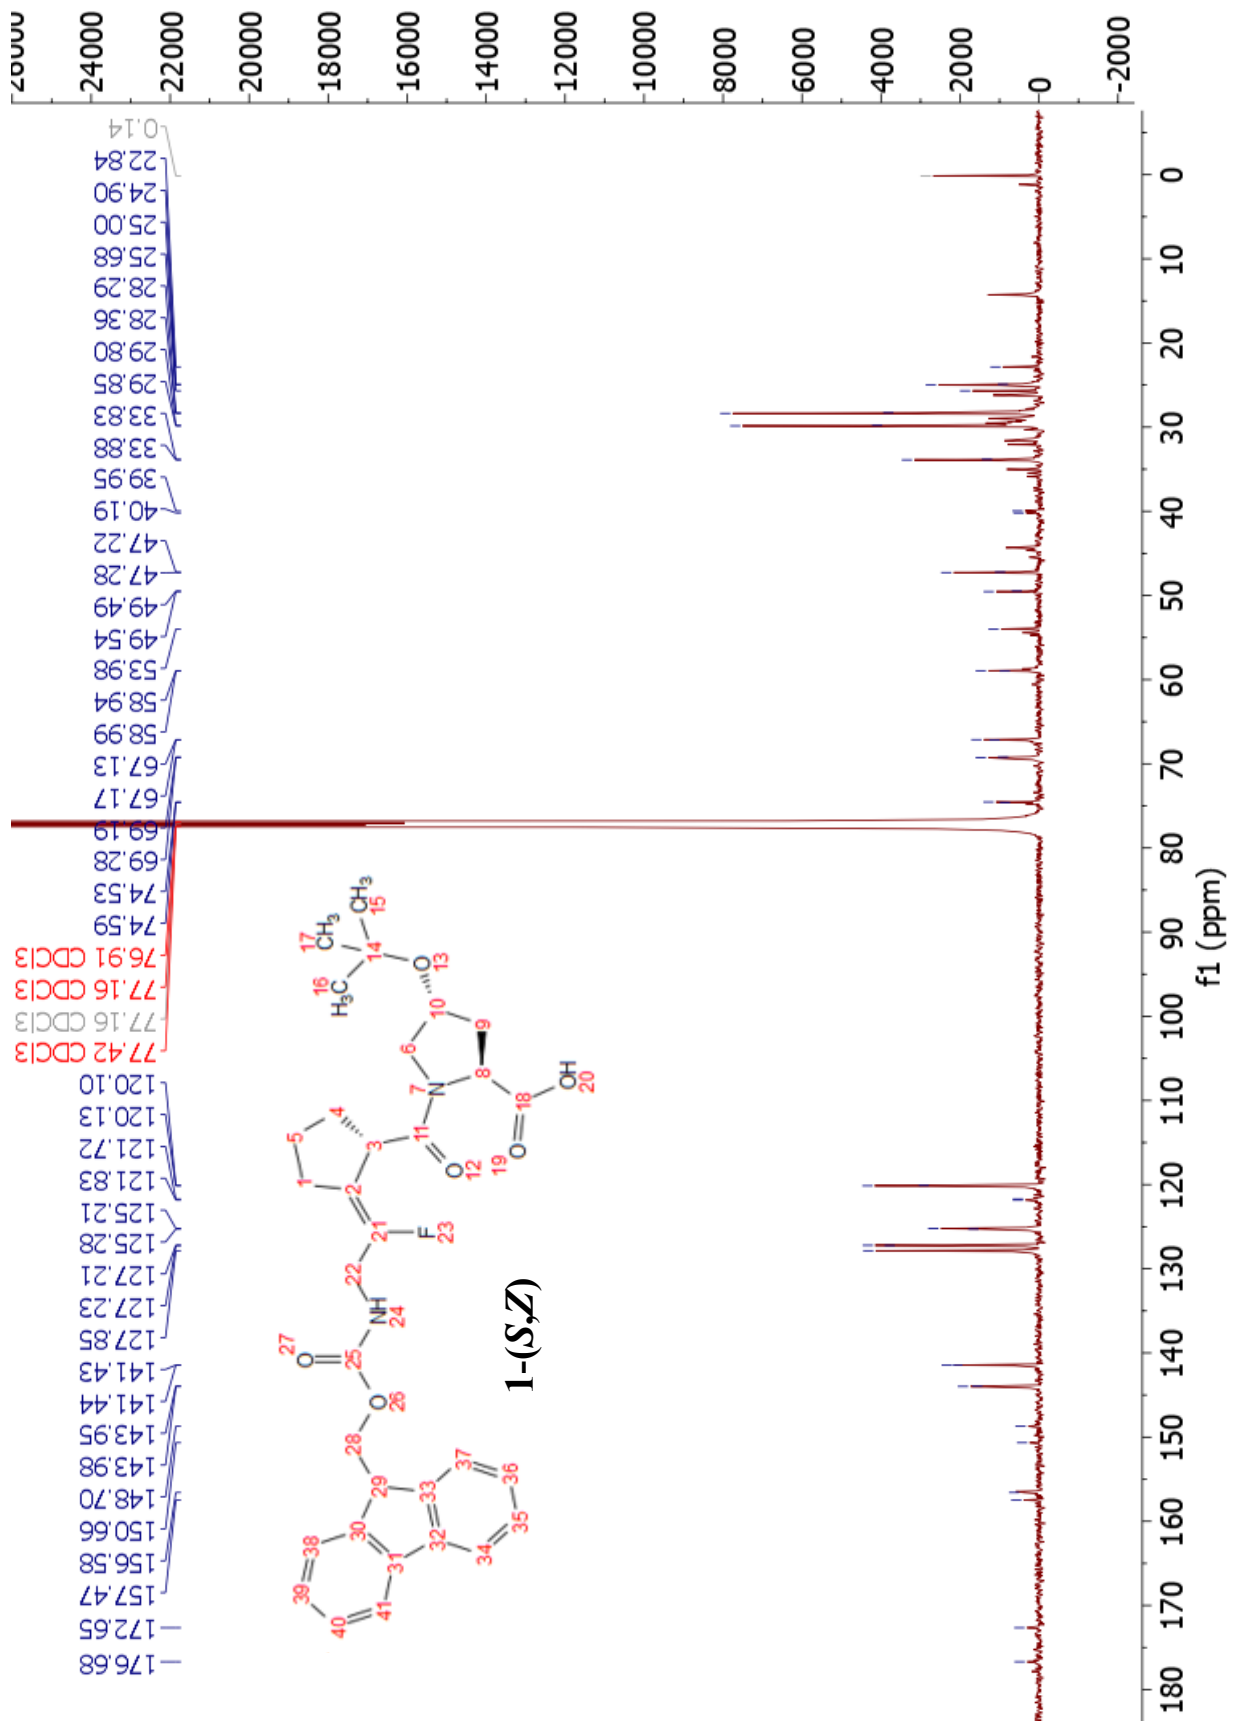

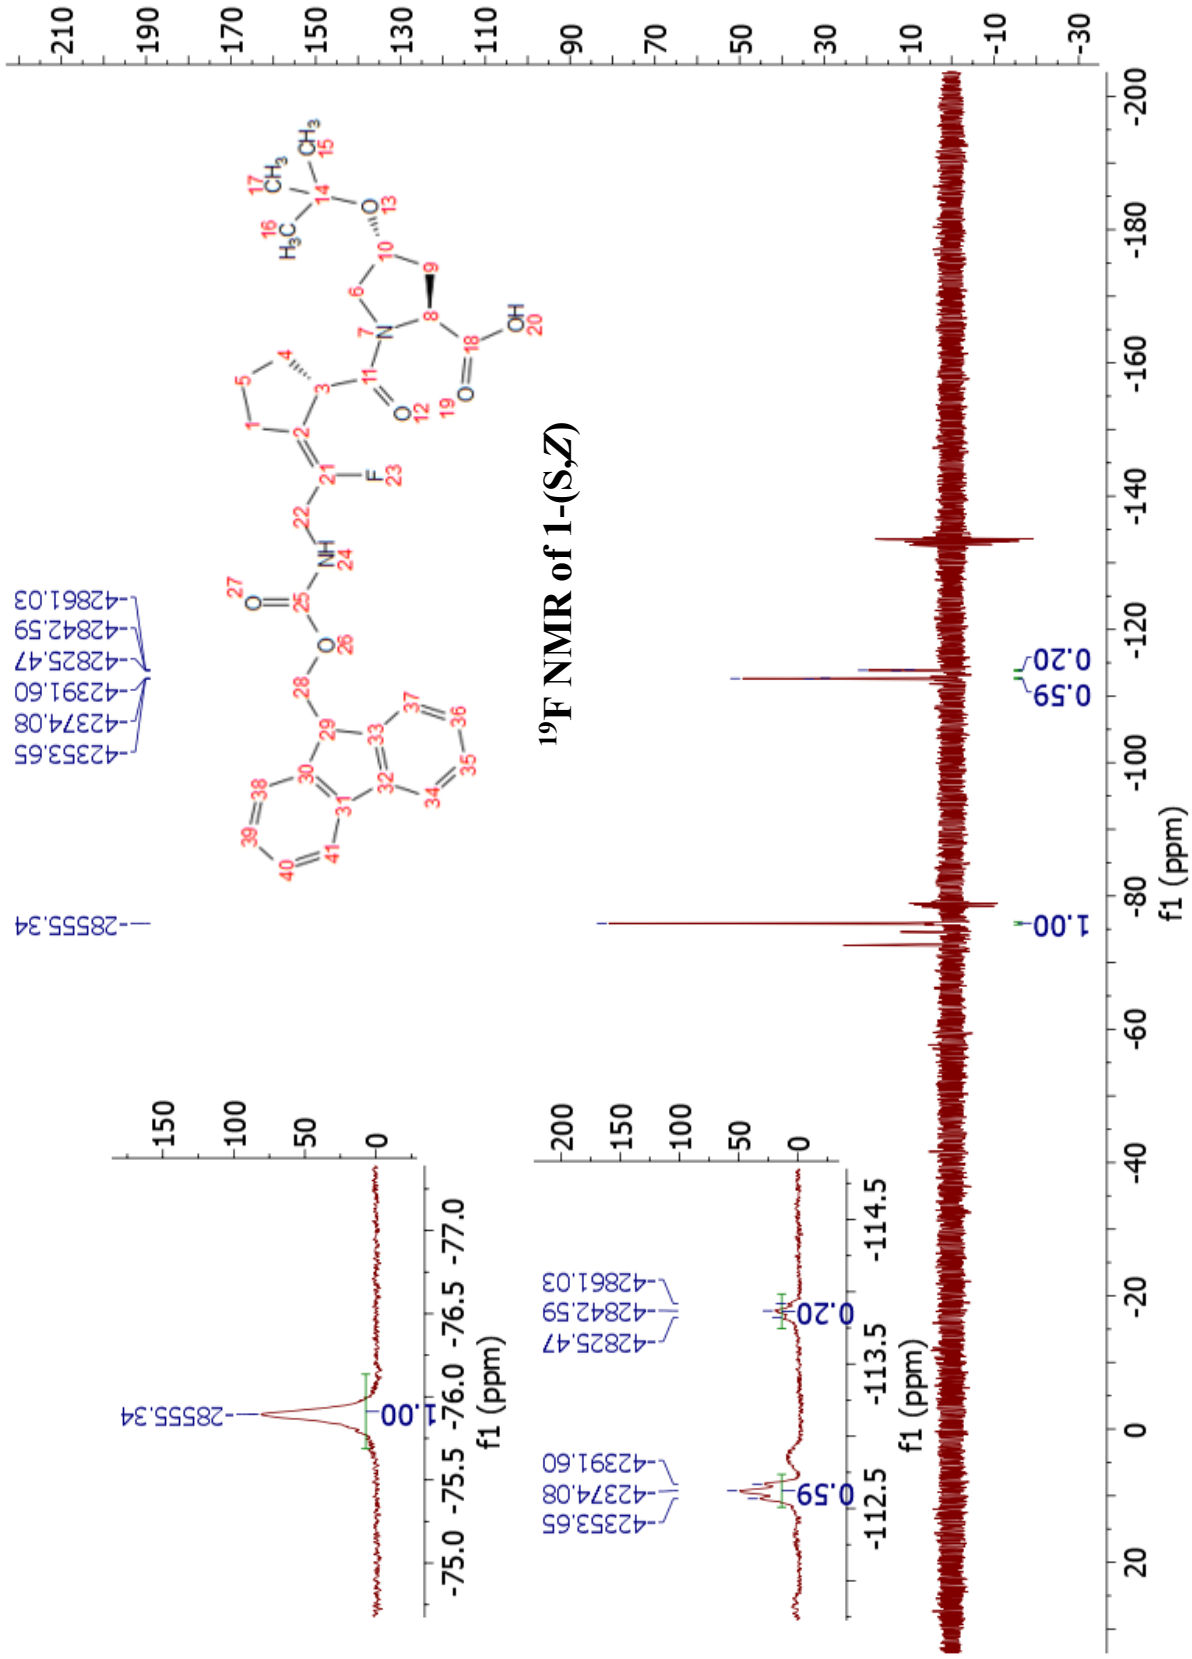



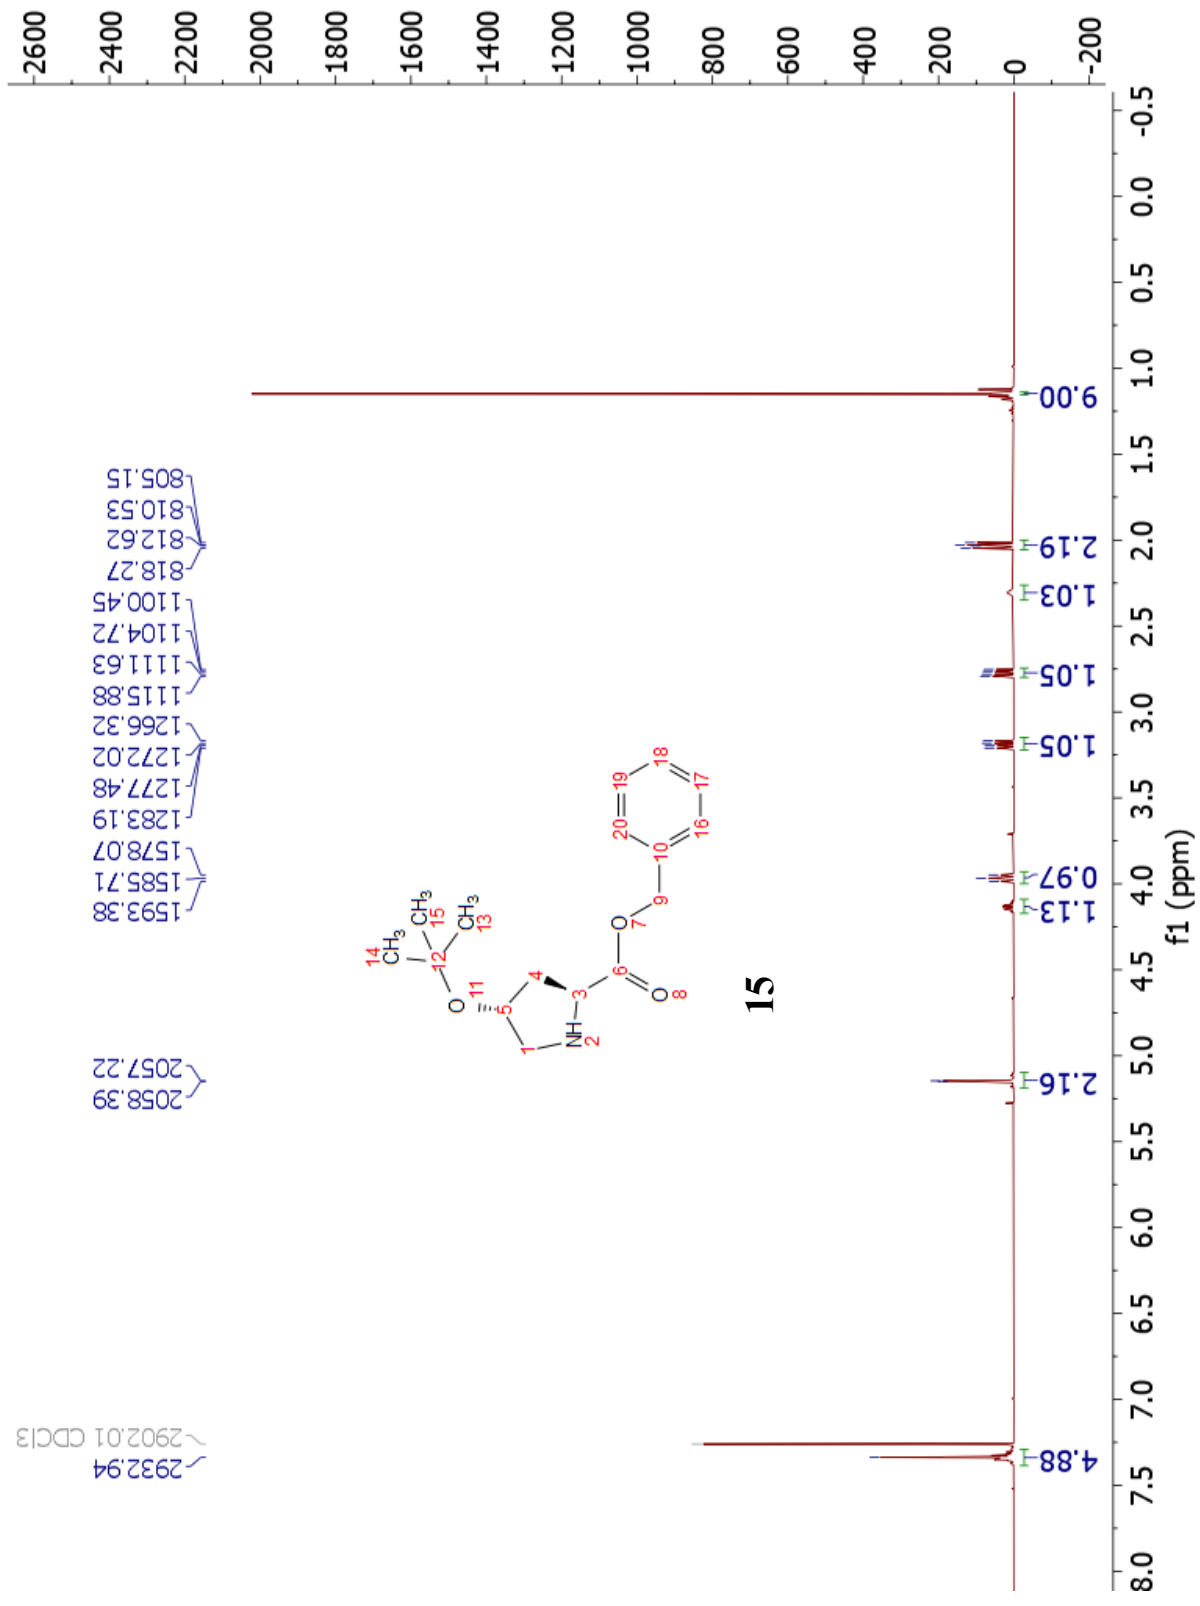

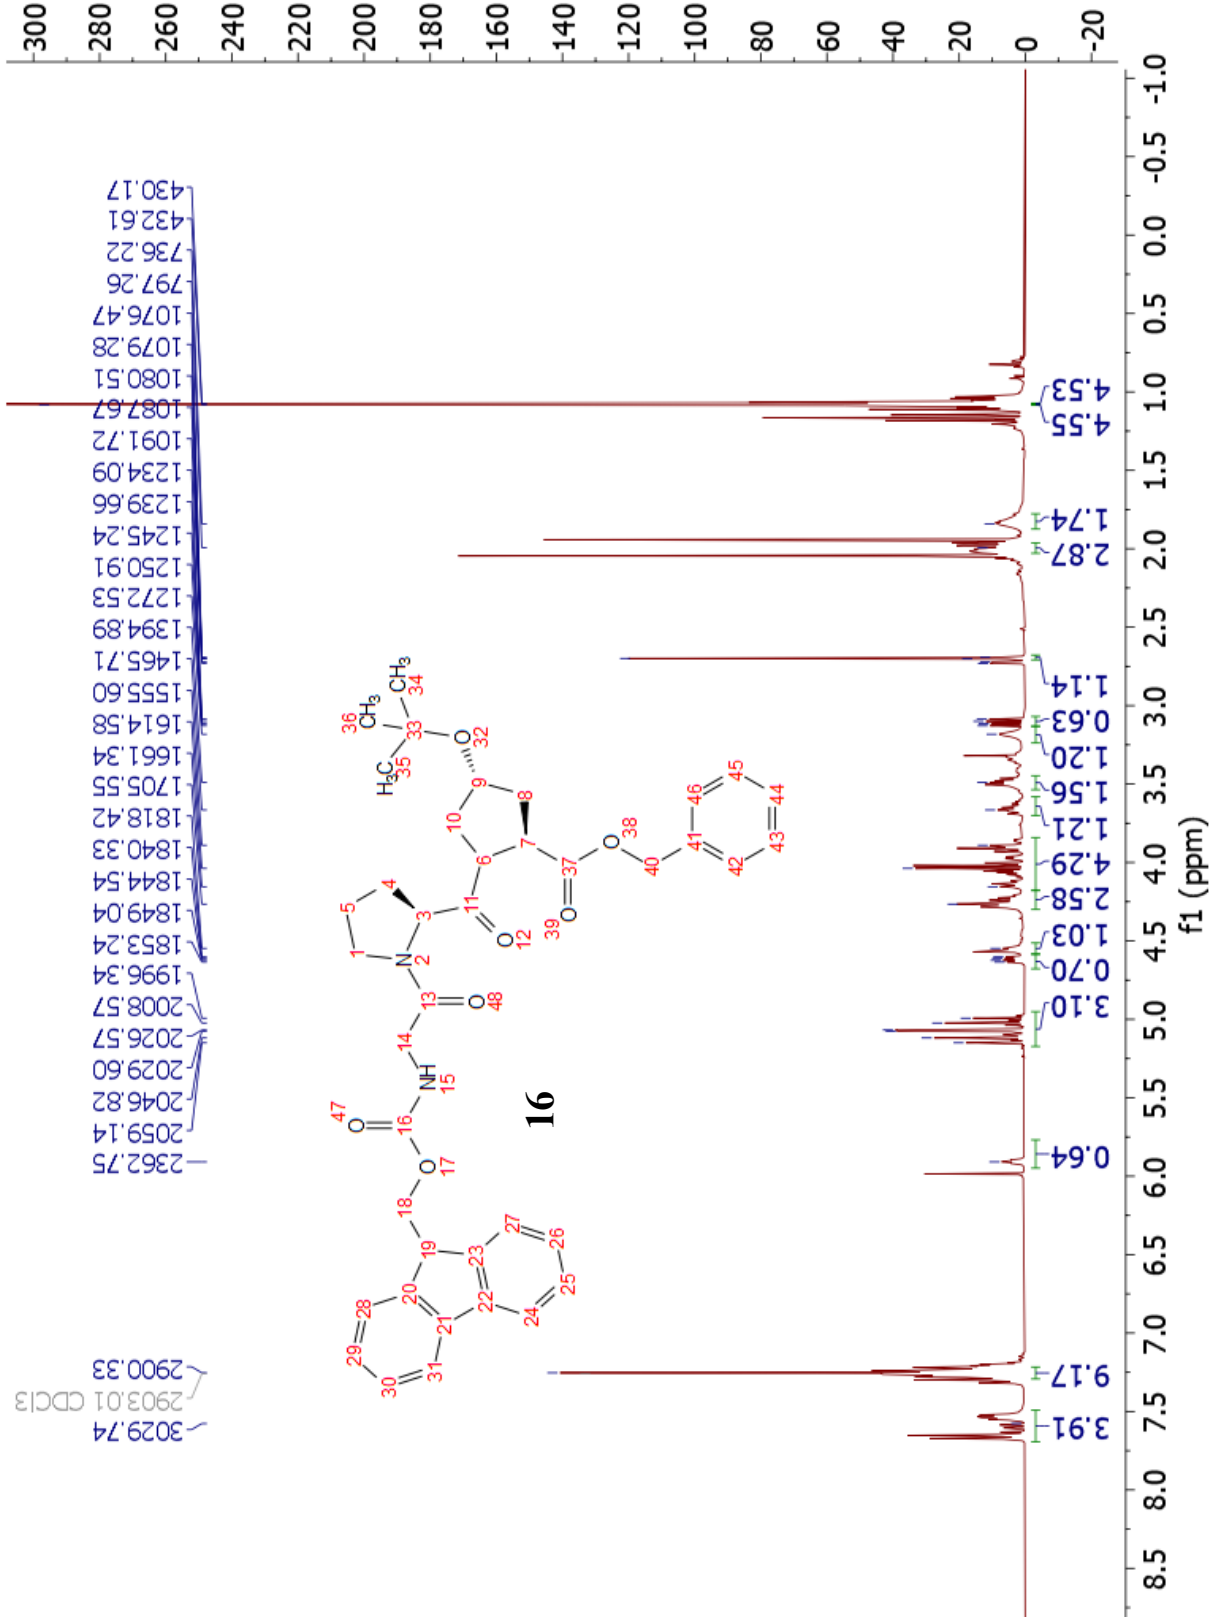

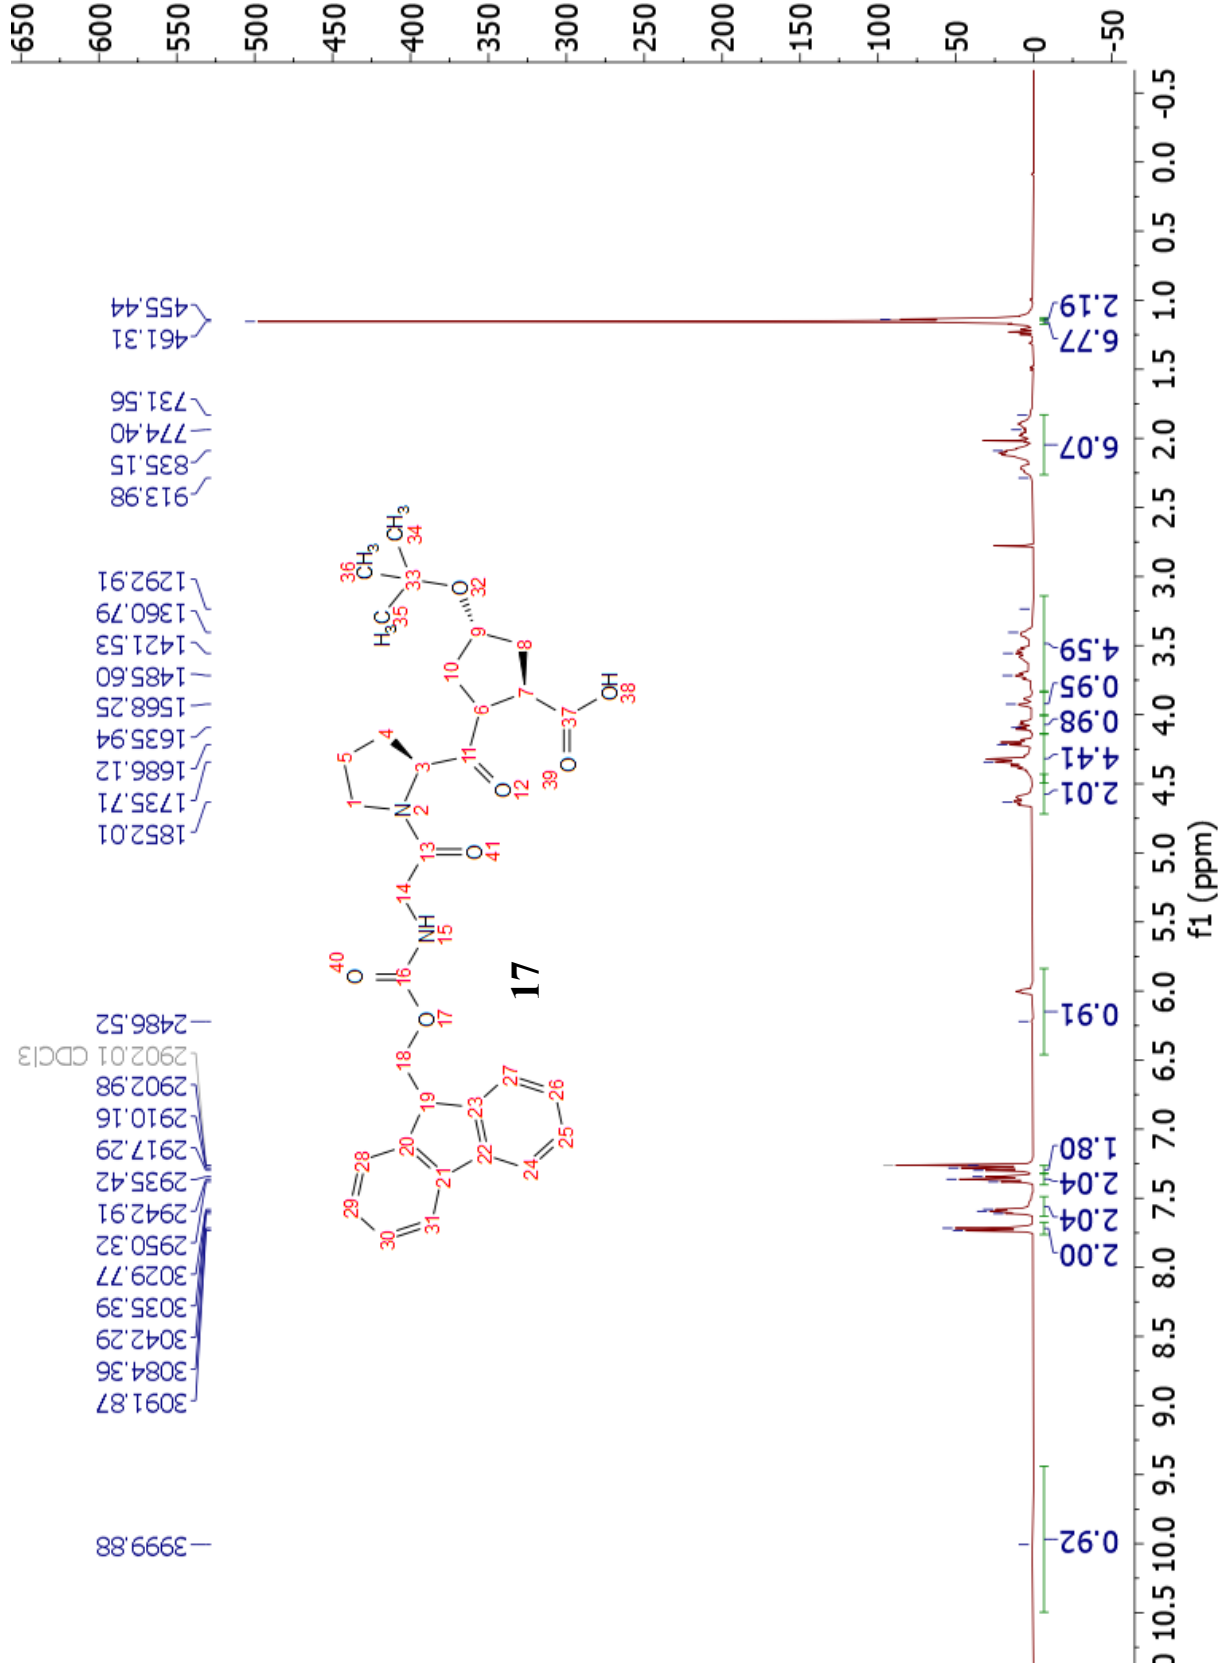



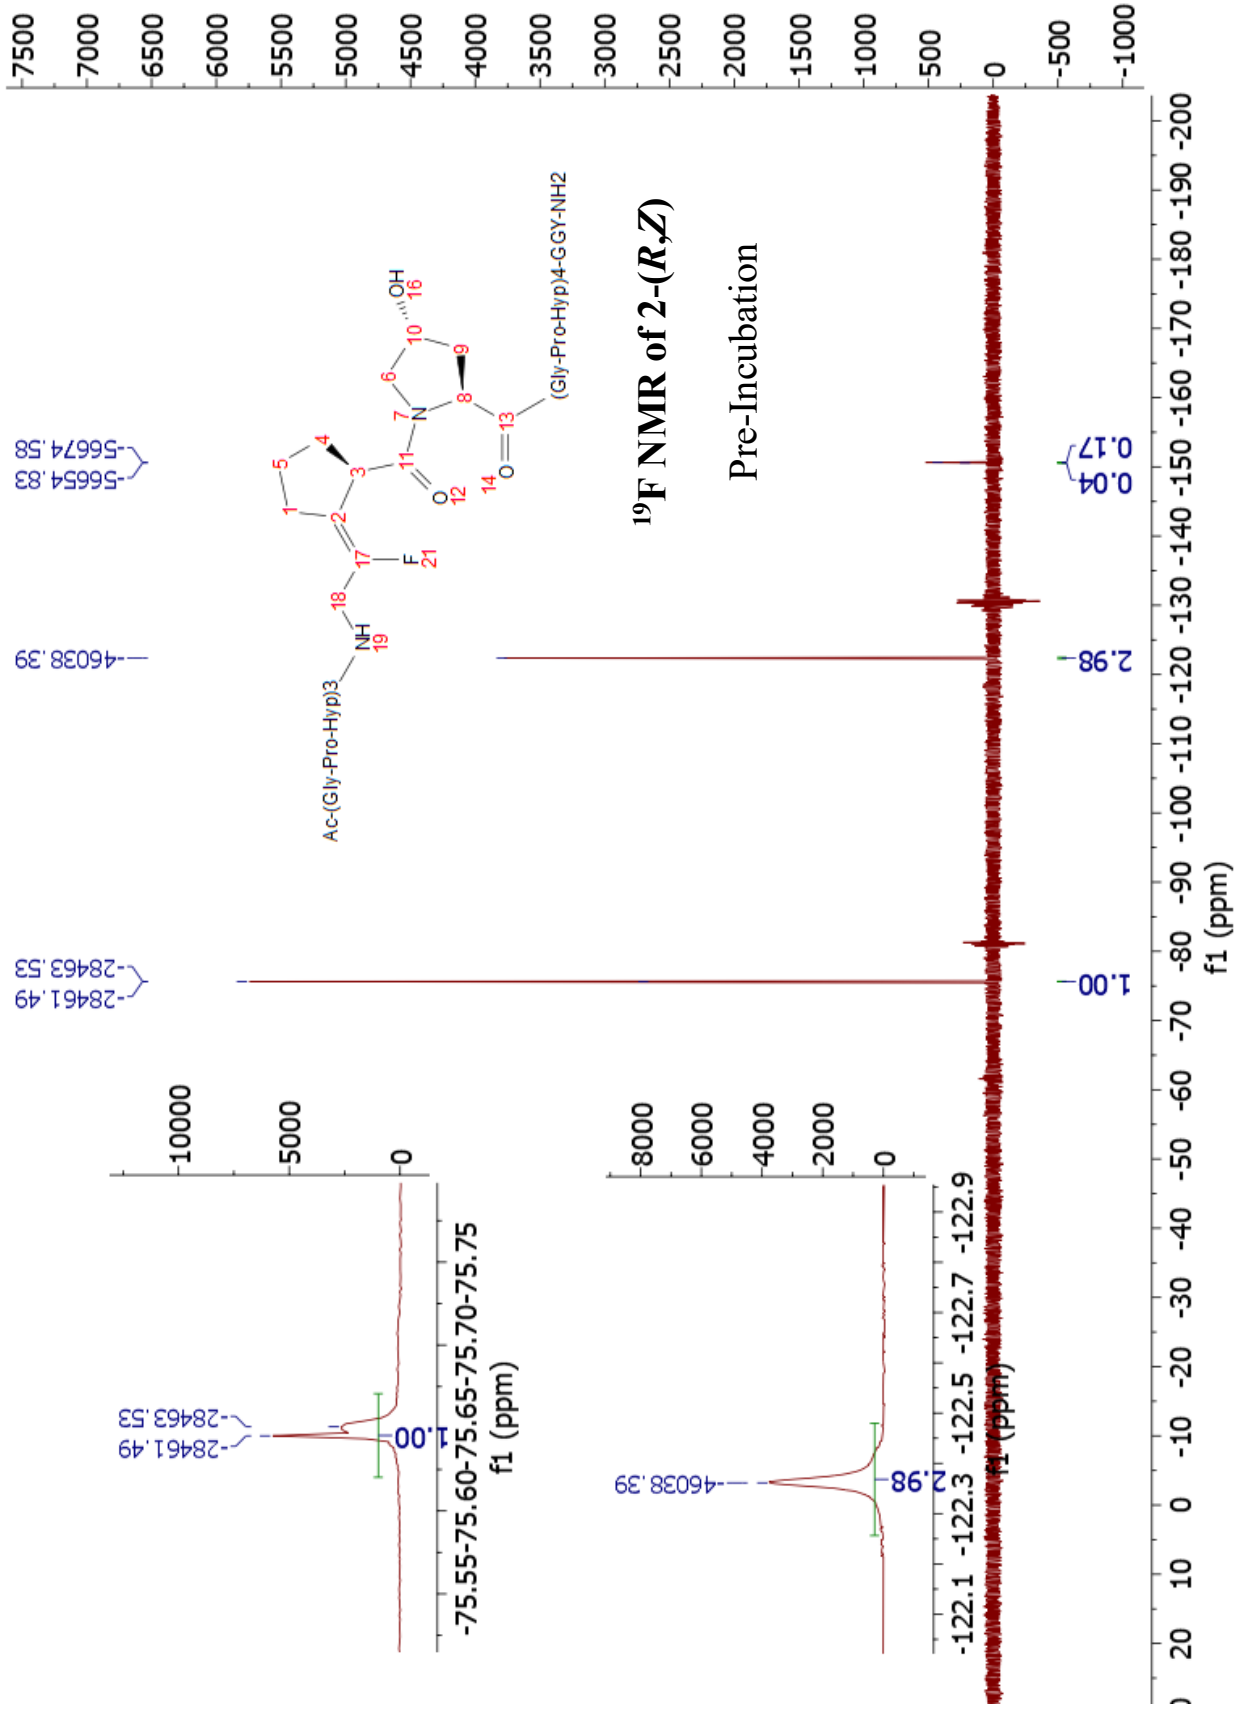

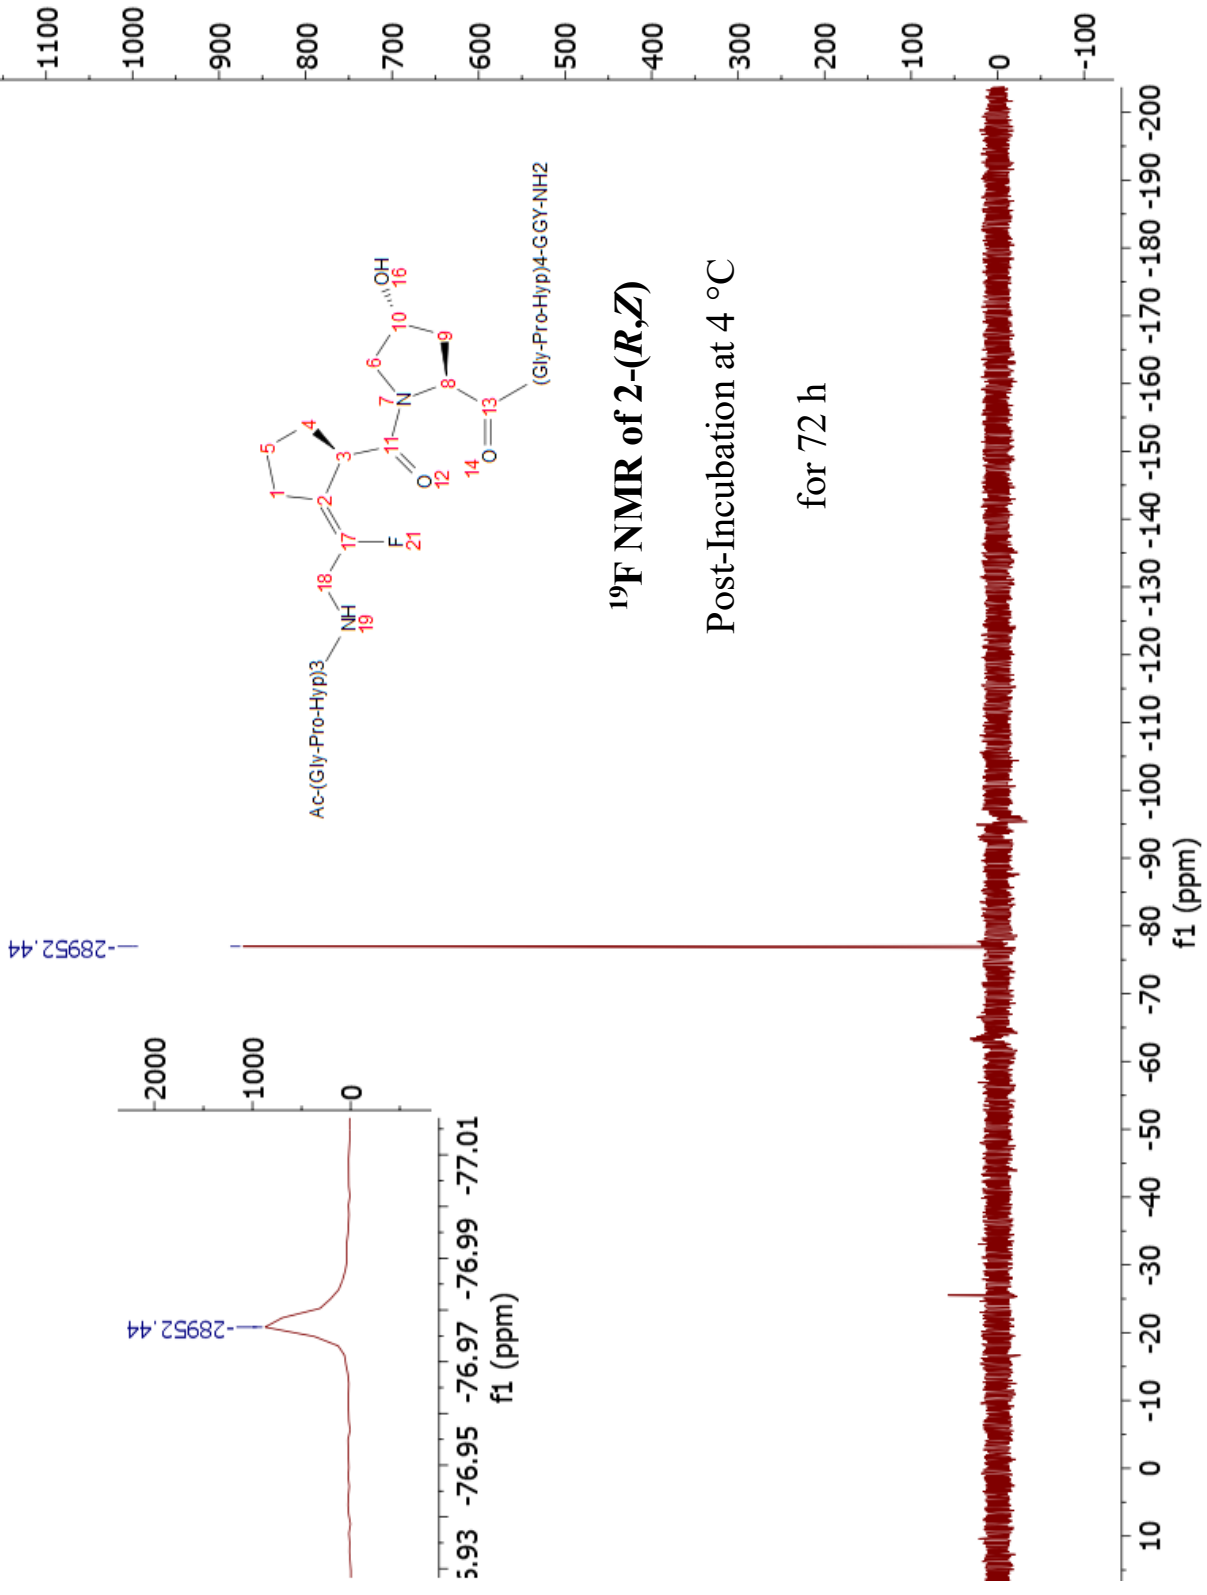

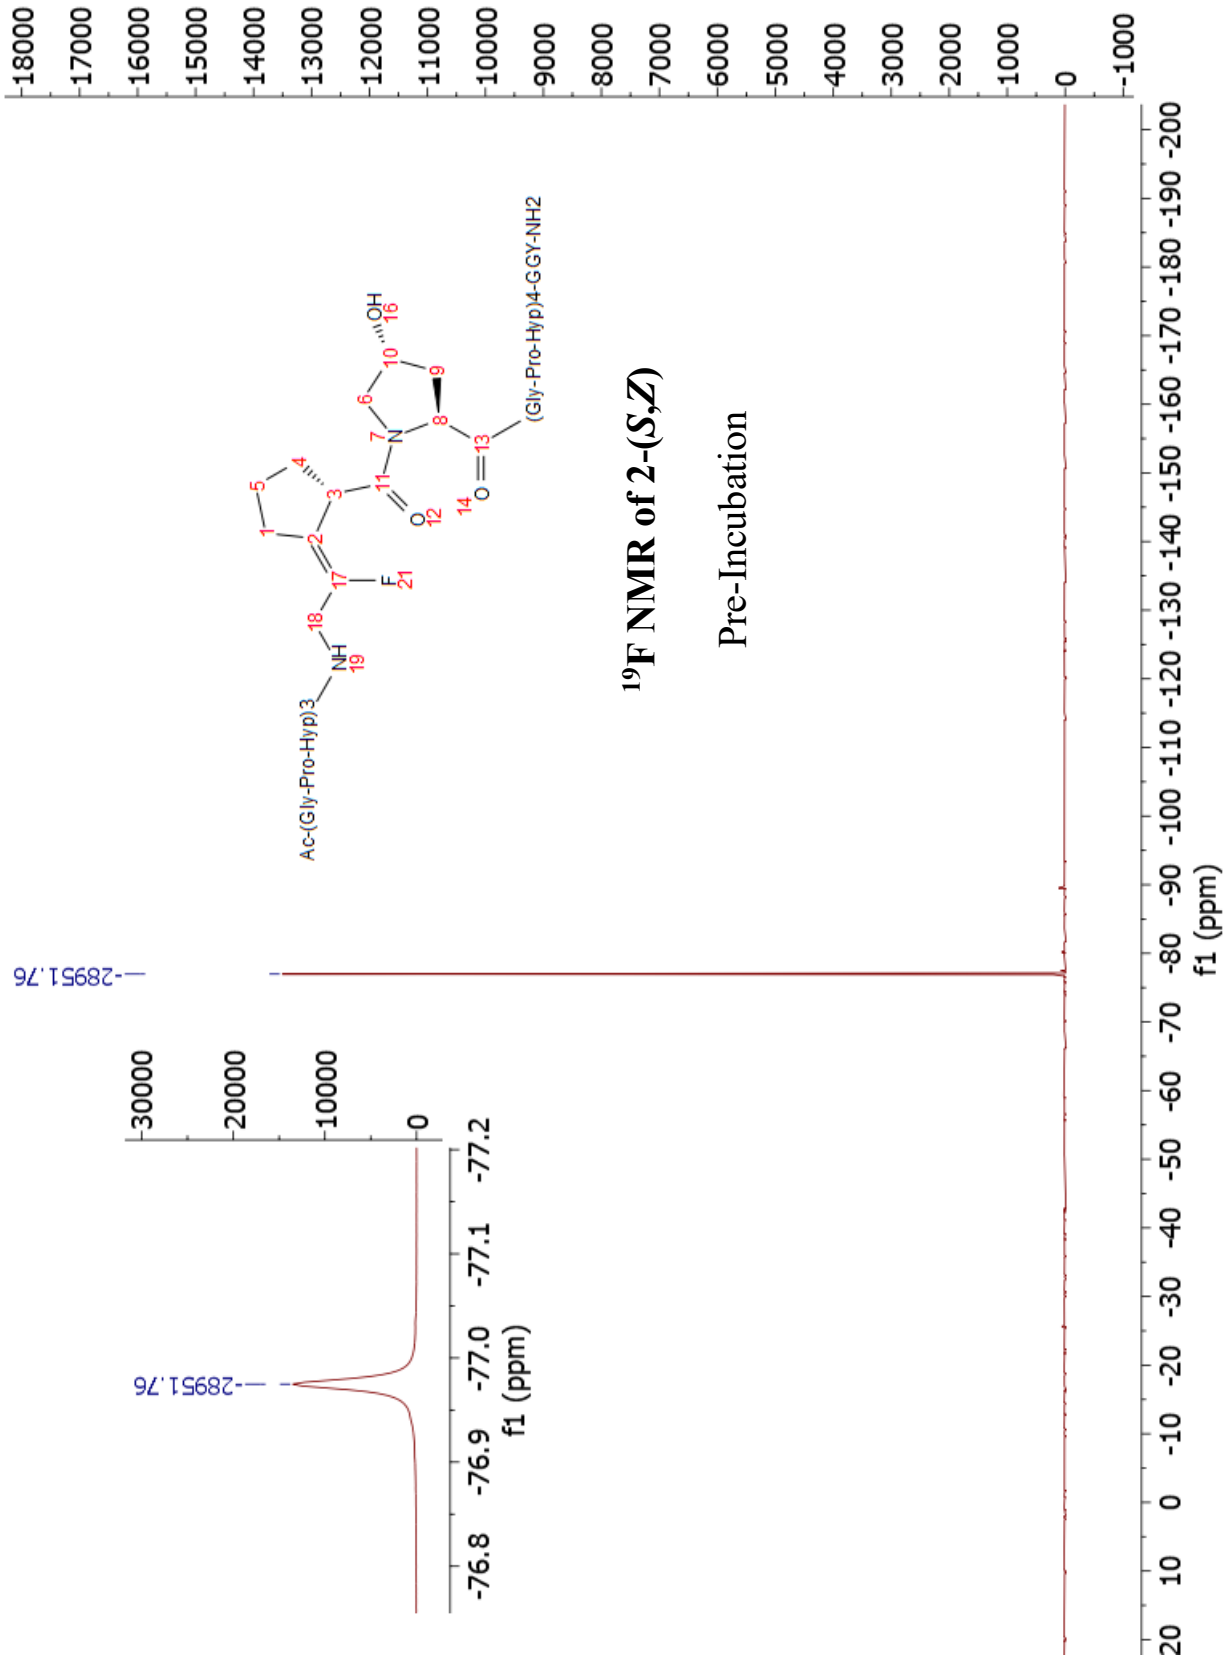

### $^{19}\text{F}$ NMR of 2-(S,Z)

Pre-Incubation

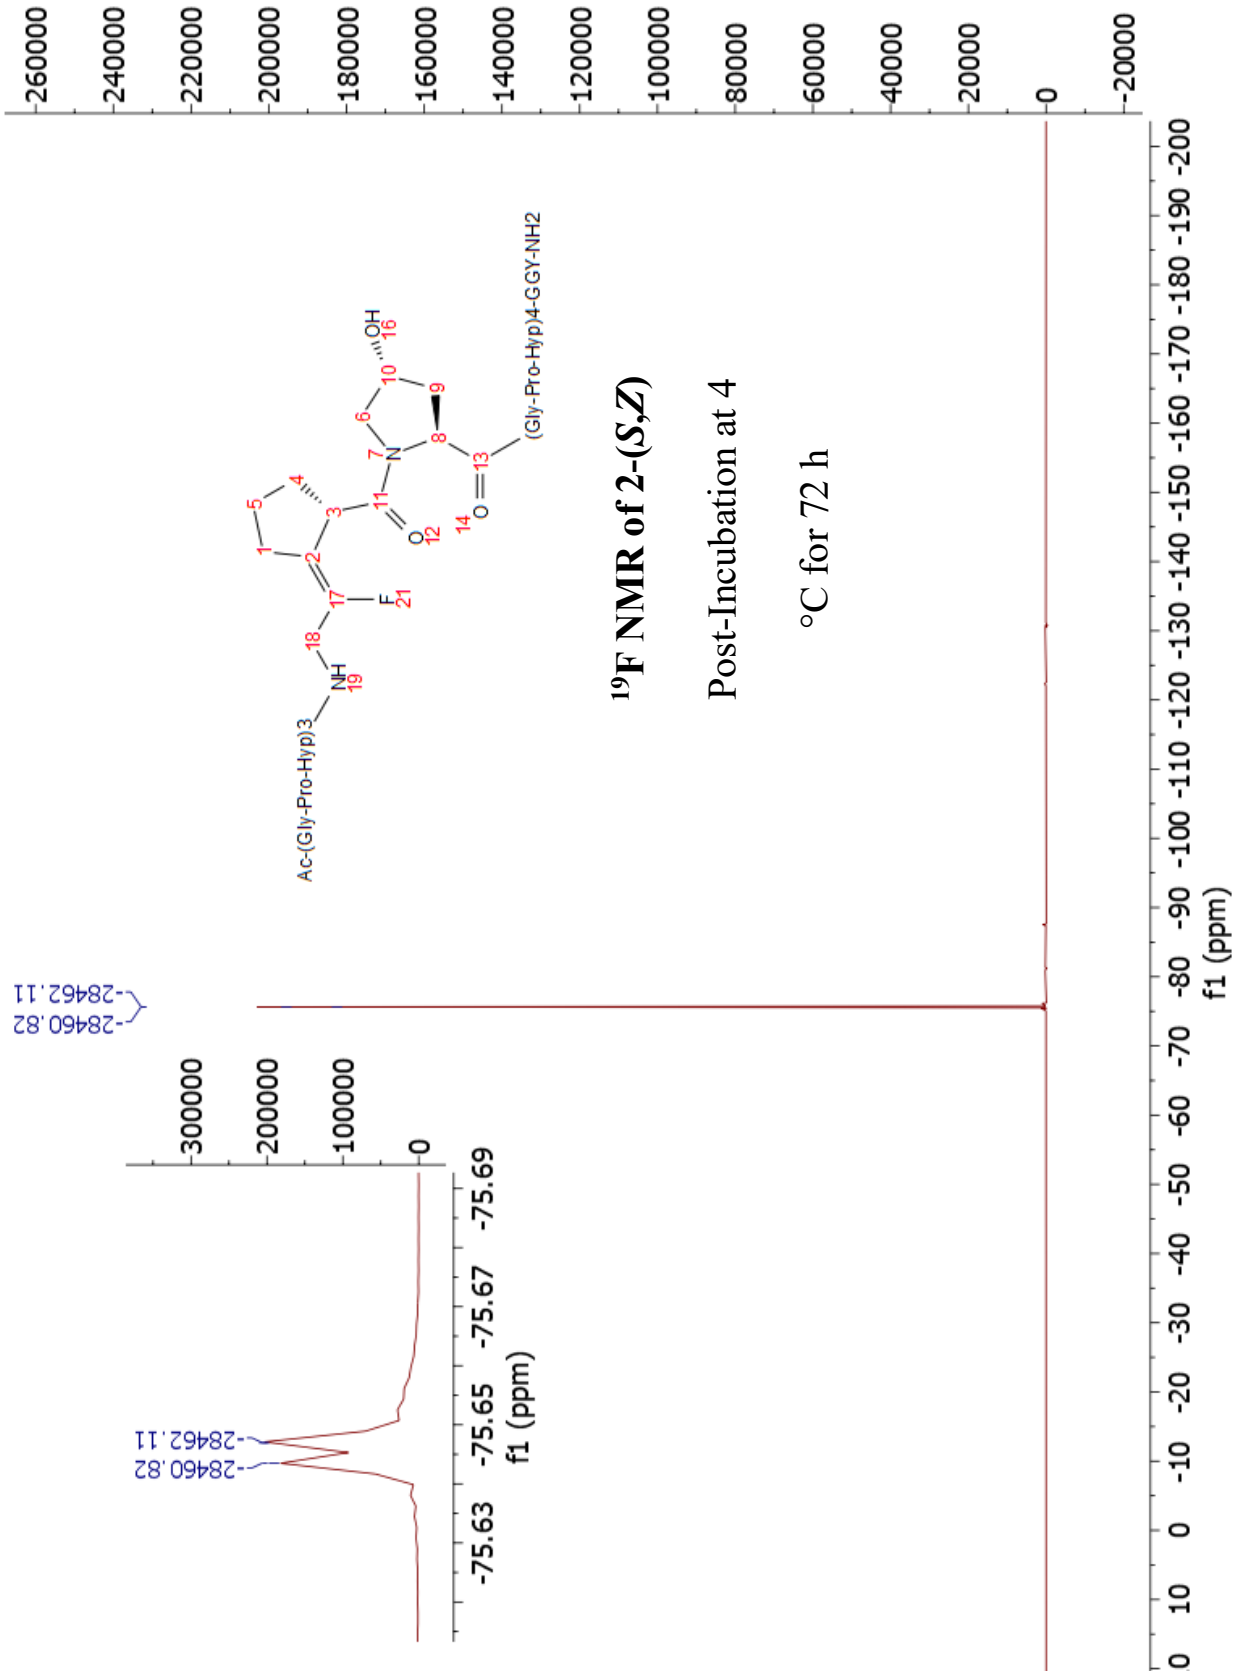

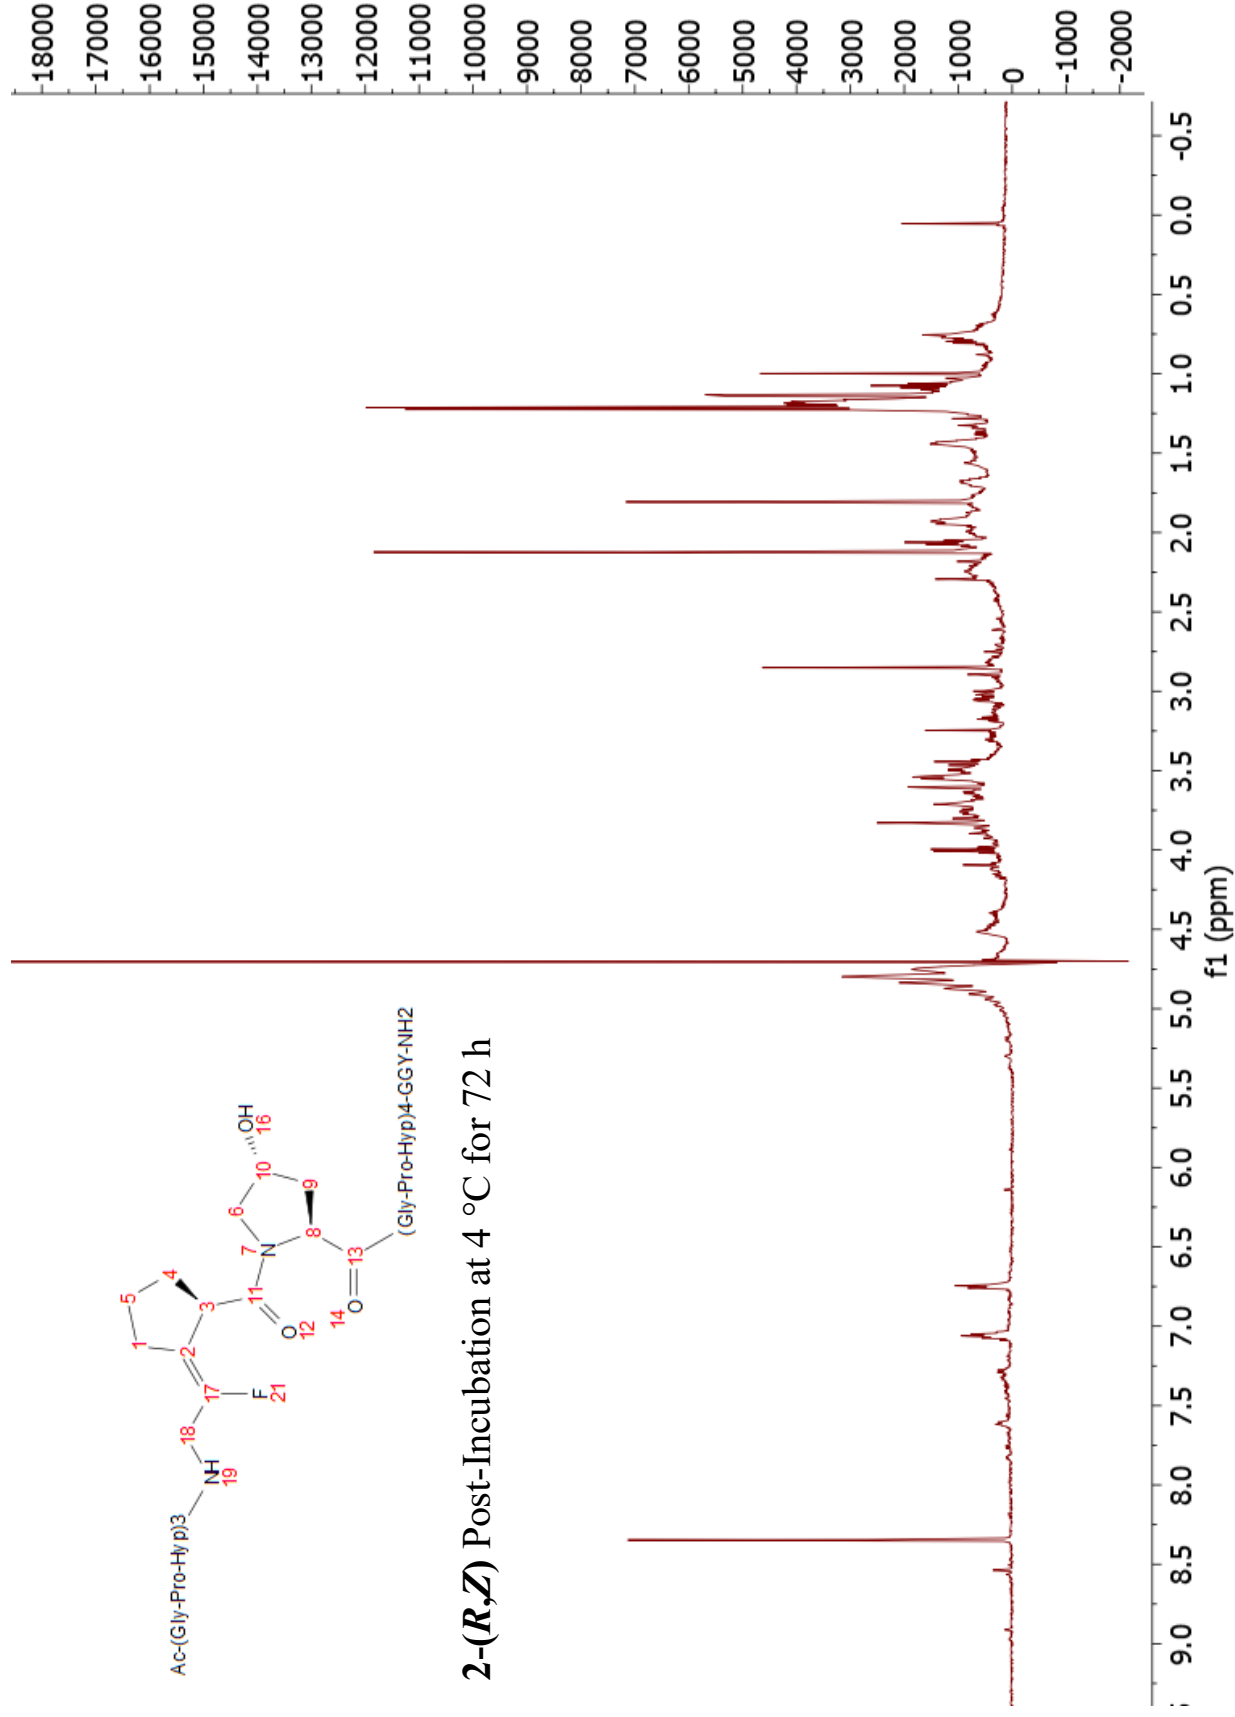

**2-(*R,Z*)** Post-Incubation at 4 °C for 72 h

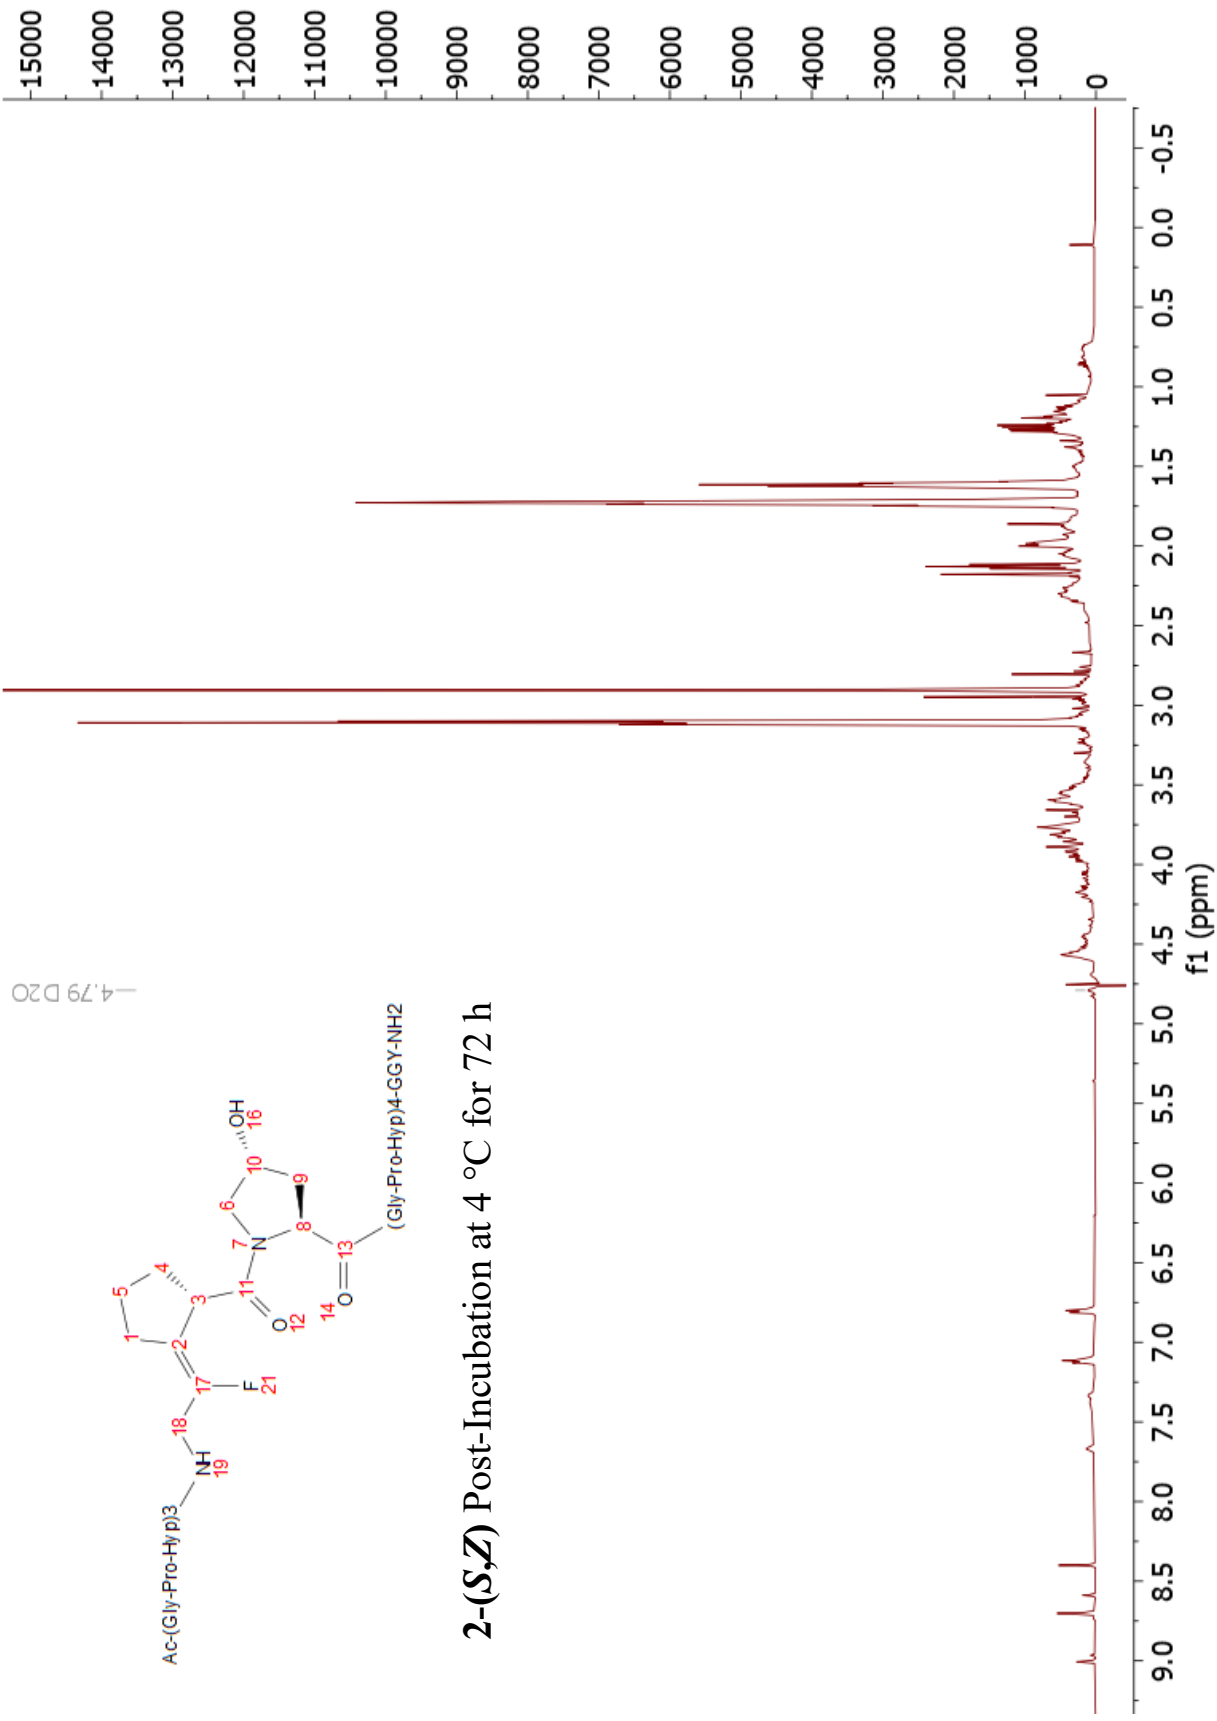

-4.79 D20

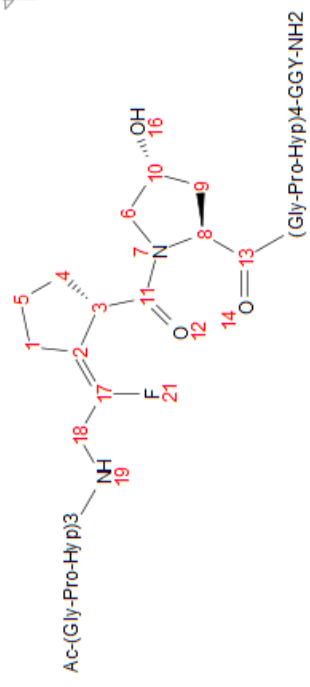

2-(*S,Z*) Post-Incubation at 4 °C for 72 h

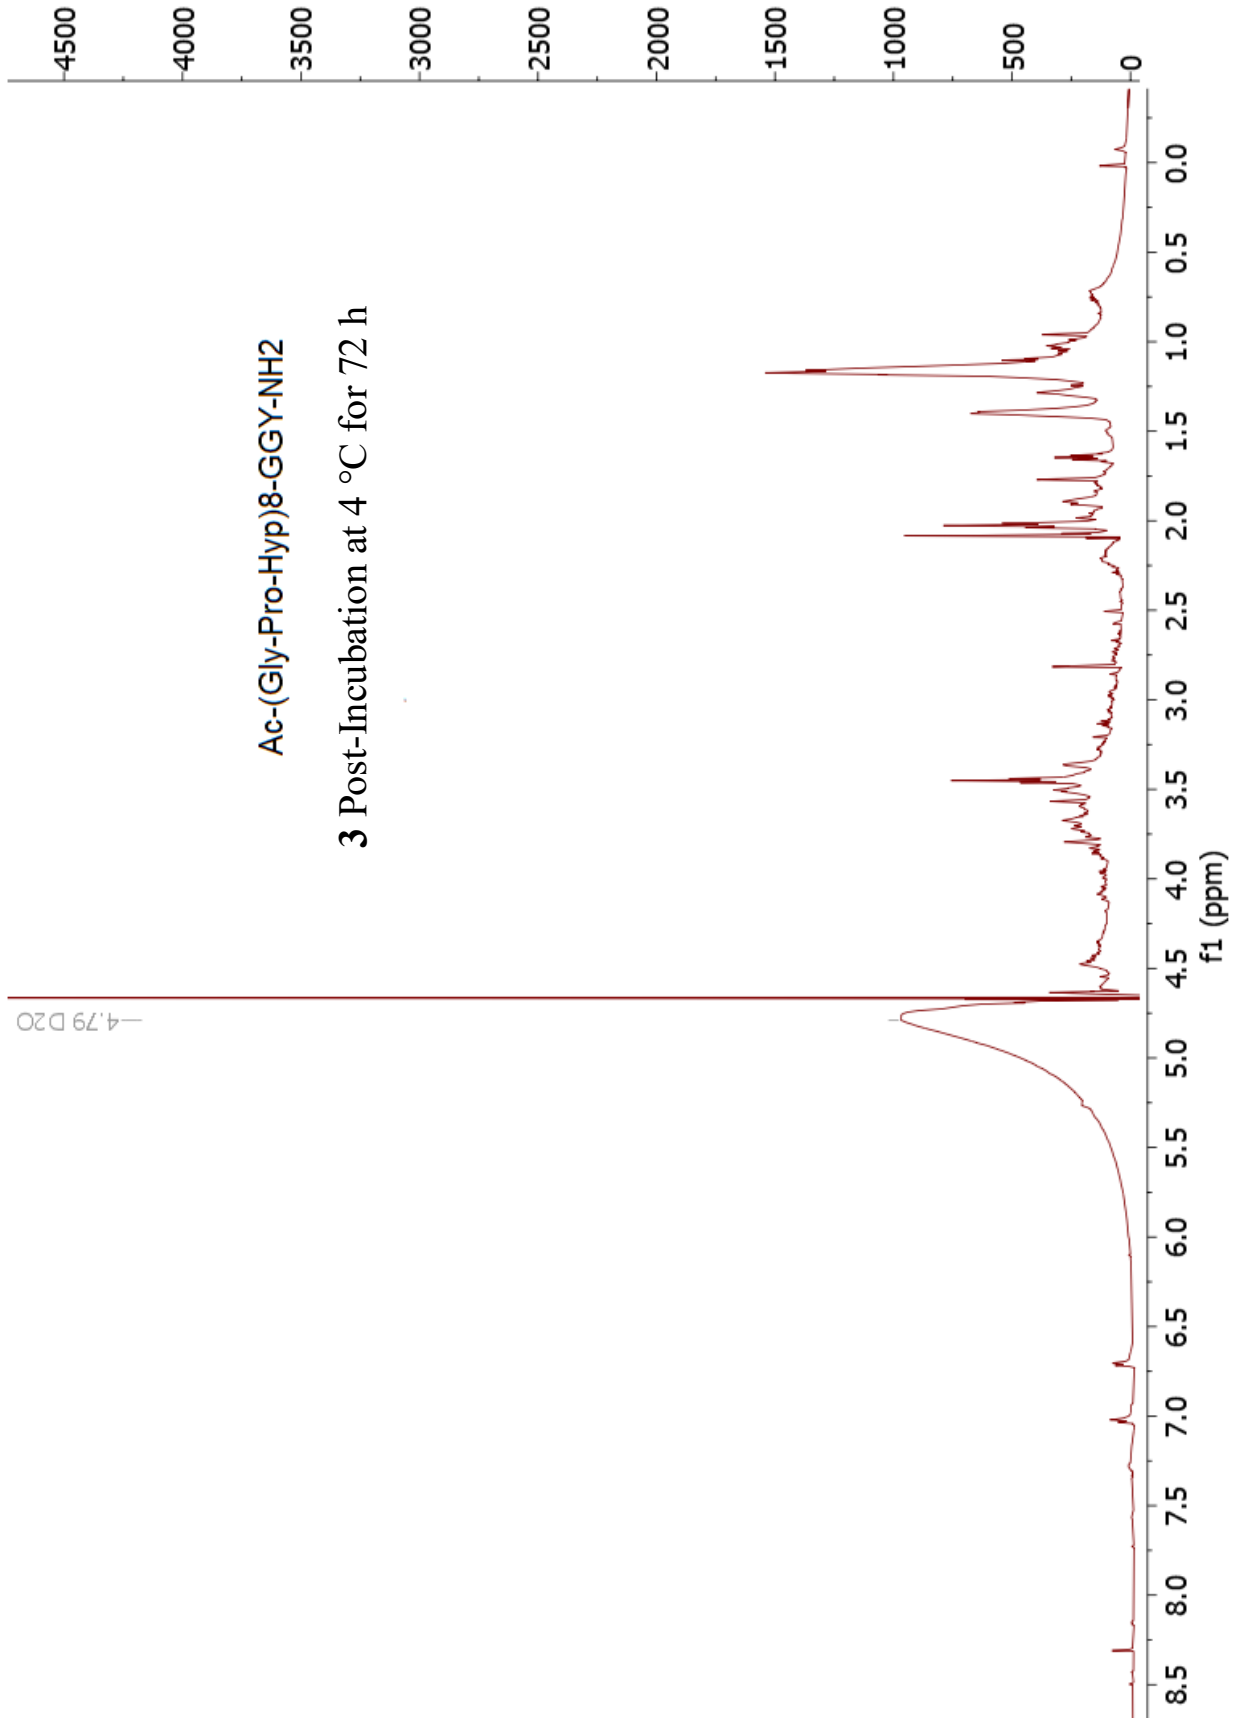

Supplement: d3ob00110e1.pdf [file d3ob00110e1.pdf]
