# Supplementary material for: A fluoro-alkene mimic of Gly-trans-Pro produces a stable collagen triple helix
Source: Royal Society of Chemistry journal article supplement (doi:10.1039/d3ob00110e), 2023-01-01
Supplement: d3ob00110e2.xlsx [file d3ob00110e2.xlsx]

## Sheet: Data
Native		Abs = 0.1588		0.533 mM
	Temp	5	10	15	20	25	30	35	40	45	50	55	60	65	70	75	80	85
	mdeg	3.26377	3.26294	3.2619	3.2284	3.08728	2.89193	2.61048	2.25633	1.96456	1.65479	1.27593	0.958784	0.654776	0.440444	0.269251	0.175589	0.156753
	Fraction %	0	0.000267137	0.000601863	0.0113839	0.0568024	0.119677	0.210263	0.324247	0.418153	0.517854	0.639791	0.741865	0.83971	0.908693	0.963792	0.993938	1
Native Remake		ABS = 0.0349		0.117 mM
	Temp	5	10	15	20	25	30	35	40	45	50	55	60	65	70	75	80	85
	mdeg	2.66426	2.66289	2.66234	2.63158	2.46209	2.2788	1.98585	1.61975	1.33174	1.01034	0.638892	0.31922	0.00822	-0.18937	-0.36408	-0.427924	-0.442716
	Fraction %	0	0.000439334	0.000617964	0.0105183	0.0650697	0.124061	0.218351	0.336182	0.42888	0.532325	0.651878	0.754766	0.854863	0.918459	0.974691	0.995239	1
2-(R,Z)		ABS = 0.0288		0.0966 mM
	Temp	5	10	15	20	25	30	35	40	45	50	55	60	65	70	75	80	85
	mdeg	1.99056	1.98076	1.95258	1.91991	1.78421	1.60186	1.3794	1.13643	0.90113	0.67051	0.429159	0.231514	0.120809	0.0720668	0.0726528	0.0798662	0.0711384
	Fraction %	0	0.0051057	0.0197872	0.036808	0.107506	0.202509	0.318408	0.444993	0.567582	0.687733	0.813475	0.916446	0.974122	0.999516	0.999211	0.995453	1
2-(S,Z)		ABS = 0.4332		1.45 mM
	Temp	5	10	15	20	25	30	35	40	45	50	55	60	65	70	75	80	85
	mdeg	2.90244	2.82037	2.57894	2.3581	2.26177	2.08935	1.96607	1.89228	1.57691	1.39026	1.15919	0.879201	0.846895	0.701971	0.523744	0.358032	0.307042
	Fraction %	0	0.0316214	0.124644	0.209733	0.246848	0.313281	0.360781	0.389212	0.510723	0.582639	0.67167	0.779549	0.791996	0.847835	0.916505	0.980354	1

## Sheet: Native Ellipticity 0.53 mM
		4.98	9.99	15	19.98	25	30.03	34.99	39.98	44.99	50.01	54.97	59.98	64.98	69.94	75.01	79.92	85.05
	300	0.0391942	0.0996609	0.0584957	0.100171	0.117442	-0.0162036	0.0279151	0.0215325	-0.0578653	-0.0340845	-0.050509	-0.0511804	-0.147044	-0.0563671	-0.0602041	-0.0544625	-0.0655417
	299.5	0.0418511	0.0977191	0.0583659	0.0998576	0.115044	-0.0151649	0.0257327	0.0202342	-0.0570906	-0.0330678	-0.054713	-0.0521952	-0.146827	-0.0579769	-0.0614038	-0.0589948	-0.0661399
	299	0.0417211	0.0967858	0.0580193	0.0990426	0.114213	-0.0152532	0.0241904	0.019415	-0.0578859	-0.0339995	-0.0555625	-0.0535935	-0.147219	-0.0597515	-0.0637449	-0.0609224	-0.0682435
	298.5	0.0415911	0.0958526	0.0576728	0.0982277	0.113382	-0.0153414	0.022648	0.0185958	-0.0586811	-0.0349312	-0.0564119	-0.0549917	-0.147611	-0.0615261	-0.066086	-0.06285	-0.070347
	298	0.0414612	0.0949193	0.0573262	0.0974127	0.11255	-0.0154296	0.0211057	0.0177766	-0.0594764	-0.0358628	-0.0572614	-0.05639	-0.148003	-0.0633007	-0.0684272	-0.0647776	-0.0724506
	297.5	0.0413312	0.0939861	0.0569796	0.0965977	0.111719	-0.0155179	0.0195634	0.0169574	-0.0602716	-0.0367945	-0.0581109	-0.0577883	-0.148395	-0.0650753	-0.0707683	-0.0667051	-0.0745542
	297	0.0412012	0.0930528	0.056633	0.0957827	0.110888	-0.0156061	0.0180211	0.0161381	-0.0610669	-0.0377261	-0.0589603	-0.0591865	-0.148787	-0.0668499	-0.0731094	-0.0686327	-0.0766578
	296.5	0.0410712	0.0921196	0.0562864	0.0949677	0.110057	-0.0156943	0.0164788	0.0153189	-0.0618622	-0.0386578	-0.0598098	-0.0605848	-0.149179	-0.0686245	-0.0754505	-0.0705603	-0.0787613
	296	0.0409413	0.0911864	0.0559398	0.0941528	0.109226	-0.0157825	0.0149364	0.0144997	-0.0626574	-0.0395895	-0.0606592	-0.0619831	-0.149571	-0.0703991	-0.0777916	-0.0724879	-0.0808649
	295.5	0.0408113	0.0902531	0.0555932	0.0933378	0.108394	-0.0158708	0.0133941	0.0136805	-0.0634527	-0.0405211	-0.0615087	-0.0633813	-0.149963	-0.0721737	-0.0801327	-0.0744154	-0.0829685
	295	0.0406813	0.0893199	0.0552467	0.0925228	0.107563	-0.015959	0.0118518	0.0128613	-0.0642479	-0.0414528	-0.0623582	-0.0647796	-0.150355	-0.0739483	-0.0824738	-0.076343	-0.085072
	294.5	0.0405513	0.0883866	0.0549001	0.0917078	0.106732	-0.0160472	0.0103095	0.0120421	-0.0650432	-0.0423844	-0.0632076	-0.0661779	-0.150747	-0.0757229	-0.084815	-0.0782706	-0.0871756
	294	0.0404214	0.0874534	0.0545535	0.0908928	0.105901	-0.0161355	0.00876717	0.0112229	-0.0658384	-0.0433161	-0.0640571	-0.0675761	-0.151139	-0.0774975	-0.0871561	-0.0801982	-0.0892792
	293.5	0.0402914	0.0865201	0.0542069	0.0900779	0.10507	-0.0162237	0.00722485	0.0104037	-0.0666337	-0.0442477	-0.0649066	-0.0689744	-0.151531	-0.0792721	-0.0894972	-0.0821257	-0.0913827
	293	0.0401614	0.0855869	0.0538603	0.0892629	0.104238	-0.0163119	0.00568253	0.00958447	-0.0674289	-0.0451794	-0.065756	-0.0703727	-0.151923	-0.0810467	-0.0918383	-0.0840533	-0.0934863
	292.5	0.0400314	0.0846536	0.0535137	0.0884479	0.103407	-0.0164001	0.00414021	0.00876526	-0.0682242	-0.0461111	-0.0666055	-0.0717709	-0.152315	-0.0828213	-0.0941794	-0.0859809	-0.0955899
	292	0.0399015	0.0837204	0.0531671	0.0876329	0.102576	-0.0164884	0.00259789	0.00794605	-0.0690194	-0.0470427	-0.067455	-0.0731692	-0.152707	-0.0845959	-0.0965205	-0.0879085	-0.0976934
	291.5	0.0397715	0.0827871	0.0528206	0.0868179	0.101745	-0.0165766	0.00105557	0.00712684	-0.0698147	-0.0479744	-0.0683044	-0.0745675	-0.153099	-0.0863705	-0.0988616	-0.089836	-0.099797
	291	0.0396415	0.0818539	0.052474	0.086003	0.100914	-0.0166648	-0.000486754	0.00630763	-0.0706099	-0.048906	-0.0691539	-0.0759657	-0.153491	-0.0881451	-0.101203	-0.0917636	-0.101901
	290.5	0.0395116	0.0809207	0.0521274	0.085188	0.100082	-0.0167531	-0.00202907	0.00548842	-0.0714052	-0.0498377	-0.0700034	-0.077364	-0.153883	-0.0899197	-0.103544	-0.0936912	-0.104004
	290	0.0393816	0.0799874	0.0517808	0.084373	0.0992512	-0.0168413	-0.00357139	0.00466921	-0.0722004	-0.0507694	-0.0708528	-0.0787623	-0.154275	-0.0916943	-0.105885	-0.0956187	-0.106108
	289.5	0.0392516	0.0790542	0.0514342	0.083558	0.09842	-0.0169295	-0.00511371	0.00385	-0.0729957	-0.051701	-0.0717023	-0.0801605	-0.154667	-0.0934689	-0.108226	-0.0975463	-0.108211
	289	0.0391216	0.0781209	0.0510876	0.082743	0.0975888	-0.0170178	-0.00665603	0.00303079	-0.0737909	-0.0526327	-0.0725518	-0.0815588	-0.155059	-0.0952435	-0.110567	-0.0994739	-0.110315
	288.5	0.0389917	0.0771877	0.050741	0.0819281	0.0967576	-0.017106	-0.00819835	0.00221158	-0.0745862	-0.0535643	-0.0734012	-0.0829571	-0.155451	-0.0970181	-0.112908	-0.101401	-0.112418
	288	0.0388617	0.0762544	0.0503944	0.0811131	0.0959264	-0.0171942	-0.00974067	0.00139237	-0.0753815	-0.054496	-0.0742507	-0.0843553	-0.155843	-0.0987927	-0.115249	-0.103329	-0.114522
	287.5	0.0387317	0.0753212	0.0500479	0.0802981	0.0950952	-0.0172824	-0.011283	0.000573165	-0.0761767	-0.0554276	-0.0751002	-0.0857536	-0.156235	-0.100567	-0.117591	-0.105257	-0.116626
	287	0.0386017	0.0743879	0.0497013	0.0794831	0.094264	-0.0173707	-0.0128253	-0.000246045	-0.076972	-0.0563593	-0.0759496	-0.0871519	-0.156627	-0.102342	-0.119932	-0.107184	-0.118729
	286.5	0.0384718	0.0734547	0.0493547	0.0786682	0.0934328	-0.0174589	-0.0143676	-0.00106525	-0.0777672	-0.057291	-0.0767991	-0.0885501	-0.157019	-0.104116	-0.122273	-0.109112	-0.120833
	286	0.0383418	0.0725214	0.0490081	0.0778532	0.0926016	-0.0175471	-0.01591	-0.00188446	-0.0785625	-0.0582226	-0.0776486	-0.0899484	-0.157411	-0.105891	-0.124614	-0.111039	-0.122936
	285.5	0.0382118	0.0715882	0.0486615	0.0770382	0.0917704	-0.0176354	-0.0174523	-0.00270367	-0.0793577	-0.0591543	-0.078498	-0.0913467	-0.157803	-0.107666	-0.126955	-0.112967	-0.12504
	285	0.0380818	0.070655	0.0483149	0.0762232	0.0909392	-0.0177236	-0.0189946	-0.00352288	-0.080153	-0.0600859	-0.0793475	-0.0927449	-0.158195	-0.10944	-0.129296	-0.114894	-0.127143
	284.5	0.0379519	0.0697217	0.0479684	0.0754082	0.090108	-0.0178118	-0.0205369	-0.00434209	-0.0809482	-0.0610176	-0.0801969	-0.0941432	-0.158587	-0.111215	-0.131637	-0.116822	-0.129247
	284	0.0378219	0.0687885	0.0476218	0.0745933	0.0892768	-0.0179001	-0.0220792	-0.0051613	-0.0817435	-0.0619493	-0.0810464	-0.0955415	-0.158979	-0.11299	-0.133978	-0.11875	-0.131351
	283.5	0.0376919	0.0678552	0.0472752	0.0737783	0.0884456	-0.0179883	-0.0236216	-0.00598051	-0.0825387	-0.0628809	-0.0818959	-0.0969397	-0.159371	-0.114764	-0.136319	-0.120677	-0.133454
	283	0.0375619	0.066922	0.0469286	0.0729633	0.0876144	-0.0180765	-0.0251639	-0.00679972	-0.083334	-0.0638126	-0.0827453	-0.098338	-0.159763	-0.116539	-0.138661	-0.122605	-0.135558
	282.5	0.037432	0.0659887	0.046582	0.0721483	0.0867832	-0.0181647	-0.0267062	-0.00761893	-0.0841292	-0.0647442	-0.0835948	-0.0997363	-0.160155	-0.118313	-0.141002	-0.124532	-0.137661
	282	0.037302	0.0650555	0.0462354	0.0713333	0.085952	-0.018253	-0.0282485	-0.00843814	-0.0849245	-0.0656759	-0.0844443	-0.101135	-0.160547	-0.120088	-0.143343	-0.12646	-0.139765
	281.5	0.037172	0.0641222	0.0458888	0.0705184	0.0851208	-0.0183412	-0.0297908	-0.00925735	-0.0857197	-0.0666075	-0.0852937	-0.102533	-0.160939	-0.121863	-0.145684	-0.128388	-0.141868
	281	0.0370421	0.063189	0.0455422	0.0697034	0.0842896	-0.0184294	-0.0313332	-0.0100766	-0.086515	-0.0675392	-0.0861432	-0.103931	-0.161331	-0.123637	-0.148025	-0.130315	-0.143972
	280.5	0.0369121	0.0622557	0.0451957	0.0688884	0.0834584	-0.0185177	-0.0328755	-0.0108958	-0.0873102	-0.0684709	-0.0869927	-0.105329	-0.161723	-0.125412	-0.150366	-0.132243	-0.146076
	280	0.0367821	0.0613225	0.0448491	0.0680734	0.0826272	-0.0186059	-0.0344178	-0.011715	-0.0881055	-0.0694025	-0.0878421	-0.106728	-0.162115	-0.127186	-0.152707	-0.13417	-0.148179
	279.5	0.0366521	0.0603893	0.0445025	0.0672584	0.081796	-0.0186941	-0.0359601	-0.0125342	-0.0889008	-0.0703342	-0.0886916	-0.108126	-0.162507	-0.128961	-0.155048	-0.136098	-0.150283
	279	0.0365222	0.059456	0.0441559	0.0664435	0.0809648	-0.0187824	-0.0375024	-0.0133534	-0.089696	-0.0712658	-0.0895411	-0.109524	-0.162899	-0.130736	-0.15739	-0.138025	-0.152386
	278.5	0.0363922	0.0585228	0.0438093	0.0656285	0.0801335	-0.0188706	-0.0390448	-0.0141726	-0.0904913	-0.0721975	-0.0903905	-0.110922	-0.163291	-0.13251	-0.159731	-0.139953	-0.15449
	278	0.0362622	0.0575895	0.0434627	0.0648135	0.0793024	-0.0189588	-0.0405871	-0.0149918	-0.0912865	-0.0731292	-0.09124	-0.112321	-0.163683	-0.134285	-0.162072	-0.141881	-0.156593
	277.5	0.0361322	0.0566563	0.0431161	0.0639985	0.0784712	-0.019047	-0.0421294	-0.015811	-0.0920818	-0.0740608	-0.0920895	-0.113719	-0.164075	-0.136059	-0.164413	-0.143808	-0.158697
	277	0.0360023	0.055723	0.0427696	0.0631835	0.07764	-0.0191353	-0.0436717	-0.0166302	-0.092877	-0.0749925	-0.0929389	-0.115117	-0.164467	-0.137834	-0.166754	-0.145736	-0.160801
	276.5	0.0358723	0.0547898	0.042423	0.0623686	0.0768088	-0.0192235	-0.045214	-0.0174494	-0.0936723	-0.0759241	-0.0937884	-0.116515	-0.16486	-0.139609	-0.169095	-0.147663	-0.162904
	276	0.0357423	0.0538565	0.0420764	0.0615536	0.0759775	-0.0193117	-0.0467564	-0.0182687	-0.0944675	-0.0768558	-0.0946378	-0.117914	-0.165252	-0.141383	-0.171436	-0.149591	-0.165008
	275.5	0.0356123	0.0529233	0.0417298	0.0607386	0.0751464	-0.0194	-0.0482987	-0.0190879	-0.0952628	-0.0777874	-0.0954873	-0.119312	-0.165644	-0.143158	-0.173777	-0.151518	-0.167111
	275	0.0354824	0.05199	0.0413832	0.0599236	0.0743152	-0.0194882	-0.049841	-0.0199071	-0.096058	-0.0787191	-0.0963368	-0.12071	-0.166036	-0.144932	-0.176118	-0.153446	-0.169215
	274.5	0.0353524	0.0510568	0.0410366	0.0591086	0.073484	-0.0195764	-0.0513833	-0.0207263	-0.0968533	-0.0796508	-0.0971862	-0.122109	-0.166428	-0.146707	-0.17846	-0.155374	-0.171318
	274	0.0352224	0.0501236	0.04069	0.0582937	0.0726527	-0.0196646	-0.0529256	-0.0215455	-0.0976485	-0.0805824	-0.0980357	-0.123507	-0.16682	-0.148482	-0.180801	-0.157301	-0.173422
	273.5	0.0350924	0.0491903	0.0403435	0.0574787	0.0718215	-0.0197529	-0.054468	-0.0223647	-0.0984438	-0.0815141	-0.0988852	-0.124905	-0.167212	-0.150256	-0.183142	-0.159229	-0.175525
	273	0.0349625	0.0482571	0.0399969	0.0566637	0.0709904	-0.0198411	-0.0560103	-0.0231839	-0.099239	-0.0824457	-0.0997346	-0.126303	-0.167604	-0.152031	-0.185483	-0.161156	-0.177629
	272.5	0.0348325	0.0473238	0.0396503	0.0558487	0.0701592	-0.0199293	-0.0575526	-0.0240031	-0.100034	-0.0833774	-0.100584	-0.127702	-0.167996	-0.153805	-0.187824	-0.163084	-0.179733
	272	0.0347025	0.0463906	0.0393037	0.0550338	0.069328	-0.0200176	-0.0590949	-0.0248223	-0.10083	-0.0843091	-0.101434	-0.1291	-0.168388	-0.15558	-0.190165	-0.165011	-0.181836
	271.5	0.0345725	0.0454573	0.0389571	0.0542188	0.0684967	-0.0201058	-0.0606372	-0.0256415	-0.101625	-0.0852407	-0.102283	-0.130498	-0.16878	-0.157355	-0.192506	-0.166939	-0.18394
	271	0.0344426	0.0445241	0.0386105	0.0534038	0.0676655	-0.020194	-0.0621796	-0.0264607	-0.10242	-0.0861724	-0.103132	-0.131896	-0.169172	-0.159129	-0.194847	-0.168867	-0.186043
	270.5	0.0343126	0.0435908	0.0382639	0.0525888	0.0668343	-0.0202823	-0.0637219	-0.02728	-0.103215	-0.087104	-0.103982	-0.133295	-0.169564	-0.160904	-0.197188	-0.170794	-0.188147
	270	0.0341826	0.0426576	0.0379174	0.0517738	0.0660032	-0.0203705	-0.0652642	-0.0280992	-0.104011	-0.0880357	-0.104831	-0.134693	-0.169956	-0.162678	-0.19953	-0.172722	-0.19025
	269.5	0.0340527	0.0417243	0.0375708	0.0509589	0.0651719	-0.0204587	-0.0668065	-0.0289184	-0.104806	-0.0889673	-0.105681	-0.136091	-0.170348	-0.164453	-0.201871	-0.174649	-0.192354
	269	0.0339227	0.0407911	0.0372242	0.0501439	0.0643407	-0.0205469	-0.0683488	-0.0297376	-0.105601	-0.089899	-0.10653	-0.137489	-0.17074	-0.166228	-0.204212	-0.176577	-0.194458
	268.5	0.0337927	0.0398579	0.0368776	0.0493289	0.0635095	-0.0206352	-0.0698911	-0.0305568	-0.106396	-0.0908307	-0.10738	-0.138888	-0.171132	-0.168002	-0.206553	-0.178504	-0.196561
	268	0.0336627	0.0389246	0.036531	0.0485139	0.0626783	-0.0207234	-0.0714335	-0.031376	-0.107192	-0.0917623	-0.108229	-0.140286	-0.171524	-0.169777	-0.208894	-0.180432	-0.198665
	267.5	0.0335328	0.0379914	0.0361844	0.0476989	0.0618471	-0.0208116	-0.0729758	-0.0321952	-0.107987	-0.092694	-0.109079	-0.141684	-0.171916	-0.171551	-0.211235	-0.18236	-0.200768
	267	0.0334028	0.0370581	0.0358378	0.046884	0.0610159	-0.0208999	-0.0745181	-0.0330144	-0.108782	-0.0936256	-0.109928	-0.143082	-0.172308	-0.173326	-0.213576	-0.184287	-0.202872
	266.5	0.0332728	0.0361249	0.0354913	0.046069	0.0601847	-0.0209881	-0.0760604	-0.0338336	-0.109577	-0.0945573	-0.110778	-0.144481	-0.1727	-0.175101	-0.215917	-0.186215	-0.204975
	266	0.0331428	0.0351916	0.0351447	0.045254	0.0593535	-0.0210763	-0.0776028	-0.0346528	-0.110373	-0.095489	-0.111627	-0.145879	-0.173092	-0.176875	-0.218258	-0.188142	-0.207079
	265.5	0.0330129	0.0342584	0.0347981	0.044439	0.0585223	-0.0211646	-0.0791451	-0.035472	-0.111168	-0.0964206	-0.112477	-0.147277	-0.173484	-0.17865	-0.2206	-0.19007	-0.209183
	265	0.0328829	0.0333251	0.0344515	0.043624	0.0576911	-0.0212528	-0.0806874	-0.0362913	-0.111963	-0.0973523	-0.113326	-0.148676	-0.173876	-0.180424	-0.222941	-0.191997	-0.211286
	264.5	0.0327529	0.0323919	0.0341049	0.0428091	0.0568599	-0.021341	-0.0822297	-0.0371105	-0.112758	-0.0982839	-0.114176	-0.150074	-0.174268	-0.182199	-0.225282	-0.193925	-0.21339
	264	0.0326229	0.0314586	0.0337583	0.0419941	0.0560287	-0.0214292	-0.083772	-0.0379297	-0.113554	-0.0992156	-0.115025	-0.151472	-0.17466	-0.183974	-0.227623	-0.195853	-0.215493
	263.5	0.032493	0.0305254	0.0334117	0.0411791	0.0551975	-0.0215175	-0.0853143	-0.0387489	-0.114349	-0.100147	-0.115874	-0.15287	-0.175052	-0.185748	-0.229964	-0.19778	-0.217597
	263	0.032363	0.0295922	0.0330652	0.0403641	0.0543663	-0.0216057	-0.0868567	-0.0395681	-0.115144	-0.101079	-0.116724	-0.154269	-0.175444	-0.187523	-0.232305	-0.199708	-0.2197
	262.5	0.032233	0.0286589	0.0327186	0.0395491	0.0535351	-0.0216939	-0.088399	-0.0403873	-0.115939	-0.102011	-0.117573	-0.155667	-0.175836	-0.189297	-0.234646	-0.201635	-0.221804
	262	0.0321031	0.0277257	0.032372	0.0387342	0.0527039	-0.0217822	-0.0899413	-0.0412065	-0.116735	-0.102942	-0.118423	-0.157065	-0.176228	-0.191072	-0.236987	-0.203563	-0.223908
	261.5	0.0319731	0.0267924	0.0320254	0.0379192	0.0518727	-0.0218704	-0.0914836	-0.0420257	-0.11753	-0.103874	-0.119272	-0.158463	-0.17662	-0.192847	-0.239329	-0.20549	-0.226011
	261	0.0318431	0.0258592	0.0316788	0.0371042	0.0510415	-0.0219586	-0.093026	-0.0428449	-0.118325	-0.104806	-0.120122	-0.159862	-0.177012	-0.194621	-0.24167	-0.207418	-0.228115
	260.5	0.0317131	0.0249259	0.0313322	0.0362892	0.0502103	-0.0220469	-0.0945683	-0.0436641	-0.11912	-0.105737	-0.120971	-0.16126	-0.177404	-0.196396	-0.244011	-0.209346	-0.230218
	260	0.0315832	0.0239927	0.0309856	0.0354743	0.0493791	-0.0221351	-0.0961106	-0.0444834	-0.119916	-0.106669	-0.121821	-0.162658	-0.177796	-0.19817	-0.246352	-0.211273	-0.232322
	259.5	0.0314532	0.0230594	0.0306391	0.0346593	0.0485479	-0.0222233	-0.0976529	-0.0453026	-0.120711	-0.107601	-0.12267	-0.164056	-0.178188	-0.199945	-0.248693	-0.213201	-0.234425
	259	0.0313232	0.0221262	0.0302925	0.0338443	0.0477167	-0.0223115	-0.0991952	-0.0461218	-0.121506	-0.108532	-0.12352	-0.165455	-0.17858	-0.20172	-0.251034	-0.215128	-0.236529
	258.5	0.0311932	0.0211929	0.0299459	0.0330293	0.0468855	-0.0223998	-0.100738	-0.046941	-0.122301	-0.109464	-0.124369	-0.166853	-0.178972	-0.203494	-0.253375	-0.217056	-0.238633
	258	0.0310633	0.0202597	0.0295993	0.0322143	0.0460543	-0.022488	-0.10228	-0.0477602	-0.123097	-0.110395	-0.125219	-0.168251	-0.179364	-0.205269	-0.255716	-0.218983	-0.240736
	257.5	0.0309333	0.0193265	0.0292527	0.0313994	0.0452231	-0.0225762	-0.103822	-0.0485794	-0.123892	-0.111327	-0.126068	-0.16965	-0.179756	-0.207043	-0.258057	-0.220911	-0.24284
	257	0.0308033	0.0183932	0.0289061	0.0305844	0.0443919	-0.0226645	-0.105365	-0.0493986	-0.124687	-0.112259	-0.126918	-0.171048	-0.180148	-0.208818	-0.260399	-0.222839	-0.244943
	256.5	0.0306733	0.01746	0.0285595	0.0297694	0.0435607	-0.0227527	-0.106907	-0.0502178	-0.125482	-0.11319	-0.127767	-0.172446	-0.18054	-0.210593	-0.26274	-0.224766	-0.247047
	256	0.0305434	0.0165267	0.028213	0.0289544	0.0427295	-0.0228409	-0.108449	-0.051037	-0.126278	-0.114122	-0.128616	-0.173844	-0.180932	-0.212367	-0.265081	-0.226694	-0.24915
	255.5	0.0304134	0.0155935	0.0278664	0.0281394	0.0418983	-0.0229291	-0.109991	-0.0518562	-0.127073	-0.115054	-0.129466	-0.175243	-0.181324	-0.214142	-0.267422	-0.228621	-0.251254
	255	0.0302834	0.0146602	0.0275198	0.0273245	0.0410671	-0.0230174	-0.111534	-0.0526754	-0.127868	-0.115985	-0.130315	-0.176641	-0.181716	-0.215916	-0.269763	-0.230549	-0.253358
	254.5	0.0301534	0.013727	0.0271732	0.0265095	0.0402359	-0.0231056	-0.113076	-0.0534947	-0.128663	-0.116917	-0.131165	-0.178039	-0.182108	-0.217691	-0.272104	-0.232477	-0.255461
	254	0.0300235	0.0127937	0.0268266	0.0256945	0.0394047	-0.0231938	-0.114618	-0.0543139	-0.129459	-0.117849	-0.132014	-0.179437	-0.1825	-0.219466	-0.274445	-0.234404	-0.257565
	253.5	0.0298935	0.0118605	0.02648	0.0248795	0.0385735	-0.0232821	-0.116161	-0.0551331	-0.130254	-0.11878	-0.132864	-0.180836	-0.182892	-0.22124	-0.276786	-0.236332	-0.259668
	253	0.0297635	0.0109272	0.0261334	0.0240645	0.0377423	-0.0233703	-0.117703	-0.0559523	-0.131049	-0.119712	-0.133713	-0.182234	-0.183284	-0.223015	-0.279127	-0.238259	-0.261772
	252.5	0.0296335	0.00999399	0.0257869	0.0232496	0.0369111	-0.0234585	-0.119245	-0.0567715	-0.131844	-0.120644	-0.134563	-0.183632	-0.183676	-0.224789	-0.281469	-0.240187	-0.263875
	252	0.0295036	0.00906075	0.0254403	0.0224346	0.0360799	-0.0235468	-0.120788	-0.0575907	-0.13264	-0.121575	-0.135412	-0.18503	-0.184068	-0.226564	-0.28381	-0.242114	-0.265979
	251.5	0.0293736	0.0081275	0.0250937	0.0216196	0.0352487	-0.023635	-0.12233	-0.0584099	-0.133435	-0.122507	-0.136262	-0.186429	-0.18446	-0.228339	-0.286151	-0.244042	-0.268082
	251	0.0292436	0.00719426	0.0247471	0.0208046	0.0344175	-0.0237232	-0.123872	-0.0592291	-0.13423	-0.123439	-0.137111	-0.187827	-0.184852	-0.230113	-0.288492	-0.24597	-0.270186
	250.5	0.0291137	0.00626101	0.0244005	0.0199896	0.0335863	-0.0238114	-0.125415	-0.0600483	-0.135025	-0.12437	-0.137961	-0.189225	-0.185244	-0.231888	-0.290833	-0.247897	-0.27229
	250	0.0289837	0.00532777	0.0240539	0.0191747	0.0327551	-0.0238997	-0.126957	-0.0608675	-0.135821	-0.125302	-0.13881	-0.190624	-0.185636	-0.233662	-0.293174	-0.249825	-0.274393
	249.5	0.0288537	0.00439452	0.0237073	0.0183597	0.0319239	-0.0239879	-0.128499	-0.0616867	-0.136616	-0.126234	-0.139659	-0.192022	-0.186028	-0.235437	-0.295515	-0.251752	-0.276497
	249	0.0287237	0.00346127	0.0233608	0.0175447	0.0310927	-0.0240761	-0.130042	-0.062506	-0.137411	-0.127165	-0.140509	-0.19342	-0.18642	-0.237212	-0.297856	-0.25368	-0.2786
	248.5	0.0285938	0.00252803	0.0230142	0.0167297	0.0302615	-0.0241644	-0.131584	-0.0633252	-0.138206	-0.128097	-0.141358	-0.194818	-0.186812	-0.238986	-0.300197	-0.255607	-0.280704
	248	0.0284638	0.00159478	0.0226676	0.0159147	0.0294303	-0.0242526	-0.133126	-0.0641444	-0.139002	-0.129029	-0.142208	-0.196217	-0.187205	-0.240761	-0.302539	-0.257535	-0.282807
	247.5	0.0283338	0.000661538	0.022321	0.0150998	0.0285991	-0.0243408	-0.134669	-0.0649636	-0.139797	-0.12996	-0.143057	-0.197615	-0.187597	-0.242535	-0.30488	-0.259463	-0.284911
	247	0.0282038	-0.000271708	0.0219744	0.0142848	0.0277679	-0.0244291	-0.136211	-0.0657828	-0.140592	-0.130892	-0.143907	-0.199013	-0.187989	-0.24431	-0.307221	-0.26139	-0.287015
	246.5	0.0280739	-0.00120495	0.0216278	0.0134698	0.0269367	-0.0245173	-0.137753	-0.066602	-0.141387	-0.131824	-0.144756	-0.200411	-0.188381	-0.246085	-0.309562	-0.263318	-0.289118
	246	0.0279439	-0.0021382	0.0212812	0.0126548	0.0261055	-0.0246055	-0.139296	-0.0674212	-0.142183	-0.132755	-0.145606	-0.20181	-0.188773	-0.247859	-0.311903	-0.265245	-0.291222
	245.5	0.0278139	-0.00307144	0.0209347	0.0118399	0.0252743	-0.0246937	-0.140838	-0.0682404	-0.142978	-0.133687	-0.146455	-0.203208	-0.189165	-0.249634	-0.314244	-0.267173	-0.293325
	245	0.0276839	-0.00400469	0.0205881	0.0110249	0.0244431	-0.024782	-0.14238	-0.0690596	-0.143773	-0.134619	-0.147305	-0.204606	-0.189557	-0.251408	-0.316585	-0.2691	-0.295429
	244.5	0.027554	-0.00493794	0.0202415	0.0102099	0.0236119	-0.0248702	-0.143923	-0.0698788	-0.144568	-0.13555	-0.148154	-0.206004	-0.189949	-0.253183	-0.318926	-0.271028	-0.297532
	244	0.027424	-0.00587118	0.0198949	0.00939491	0.0227807	-0.0249584	-0.145465	-0.0706981	-0.145364	-0.136482	-0.149004	-0.207403	-0.190341	-0.254958	-0.321268	-0.272956	-0.299636
	243.5	0.027294	-0.00680443	0.0195483	0.00857993	0.0219495	-0.0250467	-0.147007	-0.0715173	-0.146159	-0.137414	-0.149853	-0.208801	-0.190733	-0.256732	-0.323609	-0.274883	-0.30174
	243	0.027164	-0.00773767	0.0192017	0.00776496	0.0211183	-0.0251349	-0.148549	-0.0723365	-0.146954	-0.138345	-0.150703	-0.210199	-0.191125	-0.258507	-0.32595	-0.276811	-0.303843
	242.5	0.0270341	-0.00867092	0.0188551	0.00694998	0.0202871	-0.0252231	-0.150092	-0.0731557	-0.147749	-0.139277	-0.151552	-0.211598	-0.191517	-0.260281	-0.328291	-0.278738	-0.305947
	242	0.0269041	-0.00960416	0.0185086	0.006135	0.0194559	-0.0253114	-0.151634	-0.0739749	-0.148545	-0.140209	-0.152401	-0.212996	-0.191909	-0.262056	-0.330632	-0.280666	-0.30805
	241.5	0.0267741	-0.0105374	0.018162	0.00532002	0.0186247	-0.0253996	-0.153176	-0.0747941	-0.14934	-0.14114	-0.153251	-0.214394	-0.192301	-0.263831	-0.332973	-0.282593	-0.310154
	241	0.0489684	0.011234	0.0443295	0.0236078	0.0309966	-0.00210215	-0.12957	-0.0559473	-0.137803	-0.133816	-0.148895	-0.210969	-0.193899	-0.267979	-0.32596	-0.280505	-0.316084
	240.5	0.0749709	0.0371143	0.0740664	0.0453986	0.0485951	0.0241535	-0.101421	-0.0348388	-0.12269	-0.123854	-0.141287	-0.205858	-0.192513	-0.270287	-0.317376	-0.276917	-0.320652
	240	0.105252	0.068645	0.108223	0.0719541	0.0715492	0.0537609	-0.0698518	-0.00941345	-0.102848	-0.111112	-0.130112	-0.198294	-0.18782	-0.270925	-0.30722	-0.272791	-0.3227
	239.5	0.140188	0.105726	0.148597	0.10498	0.098856	0.0862703	-0.0336008	0.0212644	-0.0777541	-0.0948231	-0.116463	-0.188571	-0.179244	-0.267571	-0.294895	-0.267063	-0.323159
	239	0.180379	0.148318	0.19619	0.143411	0.131452	0.122789	0.00829138	0.0575842	-0.0476186	-0.0742409	-0.0986499	-0.176558	-0.166578	-0.259182	-0.279618	-0.2591	-0.32152
	238.5	0.225757	0.195579	0.249606	0.186531	0.168574	0.163218	0.0535708	0.0978654	-0.013076	-0.049846	-0.0768035	-0.161192	-0.150817	-0.247001	-0.262577	-0.250341	-0.31796
	238	0.277369	0.249141	0.306317	0.233526	0.211078	0.208261	0.103617	0.142279	0.0251193	-0.0199096	-0.0521243	-0.142545	-0.131493	-0.231556	-0.243877	-0.240529	-0.312895
	237.5	0.335507	0.307416	0.367099	0.283652	0.259355	0.258927	0.157311	0.190229	0.0673131	0.0129958	-0.0249329	-0.120485	-0.108686	-0.213191	-0.224585	-0.229636	-0.305451
	237	0.402698	0.372859	0.433528	0.339171	0.31356	0.315645	0.216433	0.242283	0.114646	0.0509229	0.006692	-0.0953316	-0.0819566	-0.190969	-0.204104	-0.216635	-0.296001
	236.5	0.476417	0.444317	0.504076	0.402202	0.373429	0.378224	0.279603	0.299578	0.165728	0.0932306	0.0416315	-0.0687017	-0.052227	-0.165477	-0.182892	-0.202299	-0.286544
	236	0.556931	0.52285	0.580591	0.472119	0.439803	0.446375	0.347487	0.362034	0.222757	0.139528	0.0792532	-0.0387911	-0.0189573	-0.139503	-0.160295	-0.186697	-0.275615
	235.5	0.645006	0.609099	0.662759	0.549549	0.512556	0.519537	0.419297	0.42917	0.285978	0.191775	0.121632	-0.00556428	0.0183171	-0.112008	-0.135388	-0.170509	-0.26159
	235	0.73845	0.700628	0.748499	0.633812	0.59026	0.59691	0.494064	0.500331	0.353582	0.24881	0.167044	0.0283969	0.0573519	-0.0852349	-0.109161	-0.154192	-0.245377
	234.5	0.838794	0.799102	0.84045	0.725584	0.67554	0.679685	0.572685	0.576776	0.425208	0.312092	0.216874	0.0657165	0.0980272	-0.0565894	-0.0829446	-0.135591	-0.227153
	234	0.946311	0.905611	0.939718	0.823937	0.769052	0.768272	0.656309	0.658222	0.501013	0.380709	0.269576	0.1058	0.141105	-0.0252904	-0.055951	-0.114104	-0.208319
	233.5	1.05984	1.0181	1.04614	0.927874	0.870029	0.862141	0.744197	0.742772	0.579254	0.452855	0.323753	0.148569	0.186294	0.00868312	-0.0280351	-0.0899351	-0.189321
	233	1.18042	1.13793	1.15971	1.03746	0.978599	0.961991	0.836373	0.830392	0.660597	0.527974	0.381322	0.194008	0.232507	0.0458467	0.000624585	-0.0640417	-0.168297
	232.5	1.30626	1.26365	1.27556	1.15201	1.09274	1.066	0.9301	0.918834	0.74268	0.604055	0.439672	0.241614	0.277092	0.0823799	0.0284918	-0.0391828	-0.145894
	232	1.43491	1.39277	1.39309	1.26967	1.20915	1.17298	1.02476	1.00992	0.825048	0.680315	0.498663	0.288796	0.320408	0.116455	0.0539197	-0.0155786	-0.123919
	231.5	1.56622	1.52382	1.51362	1.38958	1.32809	1.28154	1.12078	1.10217	0.909139	0.754649	0.557374	0.33356	0.362672	0.147437	0.0741115	0.00572079	-0.104677
	231	1.69934	1.65611	1.63695	1.51184	1.44737	1.39005	1.21536	1.19431	0.992473	0.827428	0.614925	0.375151	0.403548	0.175591	0.0904099	0.0241309	-0.0908074
	230.5	1.83285	1.7882	1.75963	1.63466	1.56669	1.49699	1.30861	1.28629	1.07378	0.897079	0.670991	0.41431	0.441268	0.200437	0.102124	0.0374503	-0.0823105
	230	1.96381	1.91766	1.88051	1.75337	1.68486	1.59907	1.39851	1.37449	1.15089	0.960926	0.722914	0.447767	0.473879	0.220921	0.108246	0.0432063	-0.0785435
	229.5	2.08989	2.04254	1.99555	1.86761	1.79881	1.69507	1.482	1.45742	1.22253	1.01832	0.77011	0.474234	0.497778	0.23501	0.108476	0.0401719	-0.0802772
	229	2.2081	2.16047	2.10157	1.97374	1.90482	1.7837	1.5582	1.53139	1.28444	1.06705	0.809268	0.4903	0.512436	0.23999	0.0997664	0.0282888	-0.090885
	228.5	2.3191	2.26961	2.20147	2.07137	2.00319	1.86386	1.62548	1.59741	1.33689	1.10671	0.839618	0.499754	0.516204	0.23682	0.0810722	0.00778748	-0.112407
	228	2.41928	2.36766	2.29308	2.15713	2.09232	1.93288	1.68145	1.65219	1.37967	1.1328	0.859307	0.502161	0.509229	0.22231	0.0515606	-0.0232844	-0.145945
	227.5	2.50561	2.45072	2.3722	2.22863	2.16732	1.98787	1.72392	1.69163	1.40949	1.14226	0.864807	0.494489	0.490263	0.192831	0.0110642	-0.0665841	-0.193391
	227	2.57606	2.51902	2.43497	2.28494	2.22751	2.02885	1.7499	1.71618	1.42512	1.13581	0.857301	0.476927	0.458896	0.148204	-0.0403106	-0.124616	-0.25334
	226.5	2.62946	2.56893	2.4796	2.32382	2.26899	2.05197	1.75813	1.72324	1.42339	1.11298	0.831743	0.446735	0.413251	0.0881071	-0.104668	-0.198338	-0.330561
	226	2.6643	2.5965	2.50435	2.34223	2.29121	2.05463	1.74603	1.71319	1.40232	1.07199	0.789468	0.400105	0.352402	0.0123401	-0.183153	-0.287718	-0.425905
	225.5	2.67658	2.59959	2.50973	2.33955	2.29296	2.03329	1.71152	1.6815	1.3618	1.00977	0.730083	0.335001	0.274267	-0.0816623	-0.276246	-0.393052	-0.54113
	225	2.66759	2.57908	2.49202	2.31365	2.27246	1.98689	1.65308	1.62536	1.29962	0.926978	0.649289	0.25141	0.17776	-0.194629	-0.383442	-0.514513	-0.673265
	224.5	2.63264	2.53212	2.4499	2.26352	2.22791	1.91519	1.57147	1.54422	1.21348	0.820951	0.545677	0.151646	0.0611239	-0.325354	-0.50456	-0.655027	-0.823392
	224	2.57153	2.45785	2.38225	2.18631	2.15687	1.81752	1.46633	1.43711	1.10434	0.693007	0.419751	0.0362875	-0.0764588	-0.474726	-0.63925	-0.813449	-0.989188
	223.5	2.48002	2.35451	2.2851	2.07838	2.05407	1.69062	1.33257	1.30124	0.969504	0.540935	0.26955	-0.102314	-0.235352	-0.646095	-0.791787	-0.992076	-1.17489
	223	2.35906	2.22014	2.1591	1.93733	1.9196	1.53337	1.17096	1.13569	0.807748	0.362478	0.0920807	-0.266477	-0.414909	-0.839616	-0.966344	-1.19143	-1.38306
	222.5	2.20856	2.04972	2.00252	1.76067	1.75295	1.34462	0.980165	0.939004	0.617861	0.157157	-0.113958	-0.454004	-0.616633	-1.05335	-1.16171	-1.40944	-1.61332
	222	2.02296	1.84286	1.81011	1.55014	1.54972	1.12146	0.758485	0.709311	0.397398	-0.0790089	-0.348318	-0.668674	-0.841575	-1.29038	-1.37958	-1.64885	-1.86424
	221.5	1.79961	1.59807	1.57673	1.30492	1.30692	0.86215	0.50153	0.445573	0.143667	-0.34637	-0.611189	-0.911286	-1.09155	-1.55101	-1.61927	-1.91111	-2.13507
	221	1.54022	1.31696	1.30458	1.02551	1.02657	0.569603	0.212219	0.153168	-0.139784	-0.639331	-0.898459	-1.17944	-1.36425	-1.83123	-1.87869	-2.1934	-2.42296
	220.5	1.24479	0.999389	0.996071	0.712145	0.70936	0.24503	-0.106394	-0.166881	-0.451211	-0.955891	-1.20828	-1.47193	-1.6597	-2.12895	-2.15909	-2.49402	-2.72796
	220	0.915132	0.646702	0.65445	0.36585	0.358684	-0.110683	-0.451817	-0.513189	-0.788128	-1.29616	-1.53771	-1.78776	-1.97678	-2.44525	-2.45789	-2.80975	-3.04834
	219.5	0.551891	0.262899	0.281013	-0.0117692	-0.0222508	-0.494029	-0.821237	-0.888028	-1.14898	-1.65884	-1.88864	-2.12371	-2.31295	-2.779	-2.77475	-3.14034	-3.38272
	219	0.158185	-0.148345	-0.122023	-0.418244	-0.43245	-0.901744	-1.21238	-1.28826	-1.53358	-2.03921	-2.26065	-2.47679	-2.66658	-3.12644	-3.10616	-3.48439	-3.72635
	218.5	-0.263122	-0.58521	-0.552673	-0.85026	-0.867315	-1.33113	-1.62132	-1.70726	-1.93841	-2.43592	-2.64982	-2.8443	-3.03596	-3.4843	-3.45028	-3.84127	-4.07792
	218	-0.708058	-1.04194	-1.00423	-1.30172	-1.3246	-1.77686	-2.04618	-2.14045	-2.3575	-2.84378	-3.0505	-3.22405	-3.41559	-3.85061	-3.80276	-4.20336	-4.43224
	217.5	-1.17363	-1.51561	-1.47475	-1.76911	-1.79844	-2.23576	-2.48596	-2.58531	-2.78673	-3.25914	-3.46108	-3.61609	-3.80092	-4.22599	-4.16337	-4.56837	-4.78945
	217	-1.65519	-2.00467	-1.95833	-2.24838	-2.28462	-2.70487	-2.93595	-3.04026	-3.22461	-3.68262	-3.87861	-4.01447	-4.18824	-4.60568	-4.52998	-4.93381	-5.14957
	216.5	-2.14757	-2.50588	-2.45048	-2.7337	-2.77691	-3.17948	-3.39319	-3.50001	-3.66668	-4.10794	-4.2974	-4.41093	-4.57741	-4.98454	-4.89538	-5.29485	-5.50678
	216	-2.64996	-3.01108	-2.94999	-3.22126	-3.27254	-3.65629	-3.85444	-3.96134	-4.10912	-4.53297	-4.71337	-4.80484	-4.96305	-5.36013	-5.25794	-5.65182	-5.85762
	215.5	-3.15249	-3.51372	-3.45026	-3.70589	-3.76499	-4.1288	-4.3134	-4.41675	-4.54673	-4.95134	-5.12255	-5.19443	-5.34163	-5.72599	-5.61147	-6.00058	-6.1981
	215	-3.64938	-4.0103	-3.94438	-4.18541	-4.24958	-4.59096	-4.7626	-4.86135	-4.97469	-5.35596	-5.51961	-5.57557	-5.71055	-6.07854	-5.95451	-6.33782	-6.52606
	214.5	-4.13735	-4.49801	-4.42897	-4.65657	-4.72424	-5.0431	-5.19953	-5.29561	-5.39324	-5.74875	-5.90599	-5.94806	-6.07001	-6.41899	-6.28875	-6.662	-6.84217
	214	-4.61365	-4.97273	-4.90128	-5.11587	-5.18455	-5.48198	-5.62345	-5.71725	-5.79824	-6.12847	-6.27741	-6.30926	-6.41792	-6.74704	-6.61216	-6.97164	-7.14224
	213.5	-5.07765	-5.43132	-5.35991	-5.56092	-5.6299	-5.90546	-6.03099	-6.12603	-6.18817	-6.49307	-6.63584	-6.65746	-6.75257	-7.06254	-6.9227	-7.26674	-7.42568
	213	-5.52595	-5.8722	-5.80366	-5.98979	-6.05982	-6.31083	-6.42133	-6.51712	-6.56241	-6.84107	-6.98034	-6.99001	-7.07233	-7.36203	-7.22	-7.54714	-7.69085
	212.5	-5.95702	-6.29308	-6.22797	-6.3978	-6.47147	-6.69514	-6.79049	-6.88538	-6.91744	-7.16986	-7.30507	-7.30444	-7.37505	-7.64246	-7.50206	-7.81083	-7.93886
	212	-6.36829	-6.69258	-6.63319	-6.78549	-6.86377	-7.05877	-7.14041	-7.23195	-7.25229	-7.47915	-7.60917	-7.60377	-7.66009	-7.90652	-7.76972	-8.05593	-8.16846
	211.5	-6.75971	-7.07057	-7.01825	-7.15297	-7.23446	-7.40165	-7.4709	-7.5586	-7.56831	-7.76966	-7.89317	-7.88895	-7.92709	-8.15386	-8.02372	-8.28343	-8.38154
	211	-7.13047	-7.42872	-7.38272	-7.49939	-7.58297	-7.72436	-7.78118	-7.8652	-7.86781	-8.04217	-8.15902	-8.15657	-8.17873	-8.38242	-8.26377	-8.49407	-8.57954
	210.5	-7.47892	-7.76181	-7.72279	-7.8195	-7.90516	-8.02249	-8.06754	-8.1468	-8.14571	-8.29262	-8.40183	-8.40081	-8.41224	-8.58939	-8.48326	-8.68386	-8.75696
	210	-7.80118	-8.06157	-8.03392	-8.1083	-8.19709	-8.29232	-8.32573	-8.39915	-8.39682	-8.51779	-8.61714	-8.61922	-8.62206	-8.7725	-8.67997	-8.85237	-8.91119
	209.5	-8.09395	-8.32942	-8.31377	-8.36891	-8.45669	-8.53155	-8.55539	-8.62141	-8.6195	-8.71595	-8.80514	-8.81066	-8.8073	-8.93205	-8.85234	-8.99937	-9.04448
	209	-8.35847	-8.56798	-8.56063	-8.60182	-8.68508	-8.74174	-8.75587	-8.81561	-8.81413	-8.88875	-8.96759	-8.97675	-8.96994	-9.07024	-9.00476	-9.12666	-9.15894
	208.5	-8.59655	-8.77899	-8.7772	-8.80798	-8.88511	-8.92613	-8.93116	-8.98647	-8.9845	-9.04162	-9.10959	-9.12073	-9.11213	-9.19198	-9.13996	-9.23717	-9.25783
	208	-8.80661	-8.96165	-8.96543	-8.98717	-9.05688	-9.0852	-9.08242	-9.13429	-9.13139	-9.17403	-9.23204	-9.24222	-9.22155	-9.29795	-9.25126	-9.32199	-9.32442
	207.5	-8.98827	-9.11672	-9.12502	-9.13909	-9.2021	-9.21824	-9.21008	-9.25857	-9.25555	-9.28524	-9.33645	-9.33087	-9.30514	-9.38545	-9.33618	-9.37121	-9.35406
	207	-9.14156	-9.24638	-9.25804	-9.26459	-9.32206	-9.32856	-9.31706	-9.35997	-9.35926	-9.37634	-9.4074	-9.39839	-9.36594	-9.4421	-9.39654	-9.39232	-9.32898
	206.5	-9.26694	-9.35054	-9.36385	-9.36331	-9.41523	-9.4151	-9.40256	-9.43712	-9.44006	-9.44722	-9.42838	-9.42898	-9.38591	-9.46881	-9.42867	-9.35838	-9.24488
	206	-9.36554	-9.42974	-9.44374	-9.43754	-9.48374	-9.47917	-9.46784	-9.49391	-9.49799	-9.49424	-9.42473	-9.43862	-9.37389	-9.47394	-9.41678	-9.2634	-9.09814
	205.5	-9.4408	-9.48844	-9.50173	-9.49229	-9.52955	-9.52473	-9.51201	-9.53318	-9.53589	-9.51153	-9.37546	-9.42562	-9.29879	-9.46231	-9.33578	-9.14419	-8.92112
	205	-9.49663	-9.53061	-9.54078	-9.52855	-9.55925	-9.55232	-9.53709	-9.54066	-9.54976	-9.4934	-9.2864	-9.37917	-9.18283	-9.41072	-9.21254	-9.01657	-8.68347
	204.5	-9.53453	-9.55606	-9.56381	-9.55003	-9.57399	-9.56551	-9.54562	-9.53213	-9.53964	-9.42892	-9.15498	-9.287	-9.02067	-9.32138	-9.04809	-8.87241	-8.41689
	204	-9.5551	-9.5648	-9.57185	-9.55775	-9.57525	-9.56568	-9.49612	-9.50453	-9.49656	-9.31401	-8.98616	-9.14322	-8.82512	-9.19532	-8.81719	-8.68863	-8.11247
	203.5	-9.55883	-9.5629	-9.56727	-9.54915	-9.562	-9.55342	-9.40211	-9.46308	-9.42456	-9.15025	-8.75984	-8.93469	-8.59221	-9.00821	-8.52432	-8.47464	-7.76434
	203	-9.55013	-9.55219	-9.53211	-9.52793	-9.52122	-9.53296	-9.27324	-9.39766	-9.33659	-8.94551	-8.46816	-8.69558	-8.3121	-8.77121	-8.19631	-8.20316	-7.40576
	202.5	-9.53058	-9.5308	-9.46121	-9.48282	-9.45211	-9.48785	-9.13334	-9.31184	-9.22772	-8.71349	-8.11722	-8.41558	-7.9902	-8.50599	-7.8493	-7.86849	-7.01458
	202	-9.4978	-9.49784	-9.34583	-9.39993	-9.35305	-9.38313	-8.96482	-9.17413	-9.09394	-8.44287	-7.7095	-8.08153	-7.60501	-8.22861	-7.46126	-7.47593	-6.57228
	201.5	-9.43588	-9.46033	-9.20657	-9.2617	-9.21486	-9.25497	-8.76586	-9.0039	-8.94425	-8.13706	-7.26853	-7.7054	-7.16275	-7.93466	-7.05222	-7.0455	-6.11986
	201	-9.34306	-9.41089	-9.03758	-9.06625	-9.04727	-9.09867	-8.53733	-8.82292	-8.78211	-7.82598	-6.81376	-7.32397	-6.6869	-7.6186	-6.62995	-6.60015	-5.6459
	200.5	-9.22218	-9.29951	-8.8175	-8.8186	-8.87478	-8.89692	-8.25418	-8.61019	-8.57244	-7.50921	-6.32125	-6.90874	-6.1995	-7.25294	-6.19623	-6.14292	-5.14291
	200	-9.06772	-9.15412	-8.56851	-8.53972	-8.70286	-8.666	-7.92819	-8.37524	-8.31401	-7.18092	-5.81327	-6.47123	-5.69823	-6.8766	-5.71932	-5.69756	-4.64216
	199.5	-8.89108	-8.96674	-8.32286	-8.24427	-8.52429	-8.42401	-7.57793	-8.12609	-8.03945	-6.826	-5.28956	-6.04021	-5.22188	-6.49164	-5.21356	-5.30954	-4.17115
	199	-8.68659	-8.7178	-8.07474	-7.93811	-8.3263	-8.15871	-7.1983	-7.82348	-7.74025	-6.44317	-4.72953	-5.58392	-4.75808	-6.0626	-4.72853	-4.9421	-3.7051
	198.5	-8.44759	-8.40202	-7.80473	-7.60444	-8.06548	-7.84927	-6.79653	-7.49833	-7.43434	-6.04833	-4.12092	-5.10974	-4.29537	-5.59034	-4.24917	-4.55703	-3.23418
	198	-8.17347	-8.0374	-7.52959	-7.27508	-7.75823	-7.53255	-6.40188	-7.16164	-7.12849	-5.65512	-3.52092	-4.62591	-3.84133	-5.13567	-3.77565	-4.15264	-2.78699
	197.5	-7.88317	-7.6322	-7.25268	-6.95698	-7.43006	-7.20095	-6.05046	-6.79397	-6.82985	-5.26955	-2.92972	-4.14718	-3.40685	-4.71511	-3.3396	-3.74018	-2.33972
	197	-7.59421	-7.24169	-6.97622	-6.61123	-7.11034	-6.85273	-5.74409	-6.42339	-6.56678	-4.90402	-2.37403	-3.70601	-2.98308	-4.3335	-2.95018	-3.37873	-1.92
	196.5	-7.30202	-6.87625	-6.6908	-6.27293	-6.8292	-6.50939	-5.47337	-6.0508	-6.31267	-4.56537	-1.87574	-3.30308	-2.589	-4.00304	-2.58732	-3.07661	-1.50472
	196	-6.98951	-6.49489	-6.3706	-5.90611	-6.56188	-6.14299	-5.19377	-5.63872	-6.05772	-4.2023	-1.42685	-2.87824	-2.20303	-3.68032	-2.18064	-2.80161	-1.0525
	195.5	-6.67615	-6.11269	-6.04956	-5.53844	-6.29371	-5.77574	-4.91331	-5.22579	-5.80191	-3.83837	-0.977105	-2.45365	-1.82839	-3.35674	-1.77788	-2.53476	-0.616542
	195	-6.36269	-5.73039	-5.72842	-5.17068	-6.02544	-5.4084	-4.63277	-4.81276	-5.54602	-3.47436	-0.52727	-2.0416	-1.45875	-3.03307	-1.38318	-2.2883	-0.20352
	194.5	-6.04852	-5.34738	-5.40656	-4.8022	-5.75647	-5.04034	-4.35151	-4.39902	-5.28941	-3.10963	-0.0918635	-1.63197	-1.09345	-2.7218	-0.99436	-2.05495	0.168565
	194	-5.73693	-4.96695	-5.08729	-4.4363	-5.49007	-4.67486	-4.07282	-3.98786	-5.03537	-2.74769	0.313311	-1.24155	-0.751722	-2.426	-0.616715	-1.86214	0.492689
	193.5	-5.42757	-4.58875	-4.77025	-4.07264	-5.22591	-4.31162	-3.79638	-3.57894	-4.78365	-2.39289	0.711399	-0.855814	-0.4245	-2.1388	-0.267672	-1.71502	0.76711
	193	-5.11999	-4.21233	-4.45499	-3.71075	-4.96352	-3.95015	-3.52572	-3.17345	-4.53609	-2.05394	1.0764	-0.479086	-0.146459	-1.85669	0.0251024	-1.58285	1.01913
	192.5	-4.81182	-3.83535	-4.13913	-3.3498	-4.70054	-3.59134	-3.25826	-2.78609	-4.29847	-1.73866	1.41378	-0.119428	0.10196	-1.60264	0.288343	-1.4503	1.21778
	192	-4.50417	-3.4589	-3.8238	-2.98939	-4.43809	-3.23308	-2.99396	-2.40154	-4.07211	-1.45758	1.71974	0.206224	0.313895	-1.37768	0.520934	-1.32725	1.39599
	191.5	-4.1995	-3.0854	-3.51143	-2.63198	-4.17907	-2.87786	-2.77777	-2.02595	-3.86825	-1.21938	1.99591	0.484802	0.500742	-1.18336	0.692621	-1.24045	1.54126
	191	-3.89786	-2.71481	-3.20215	-2.28412	-3.9276	-2.52729	-2.59753	-1.65744	-3.6864	-1.0237	2.21874	0.701675	0.655098	-1.04658	0.807021	-1.1798	1.64628
	190.5	-3.60066	-2.34866	-2.91804	-1.94401	-3.70195	-2.1813	-2.44702	-1.31032	-3.51861	-0.864749	2.37713	0.88839	0.762938	-0.960037	0.887033	-1.17544	1.74191
	190	-3.30995	-1.98929	-2.66865	-1.62286	-3.50353	-1.85993	-2.3068	-0.983502	-3.37216	-0.733536	2.47547	1.03371	0.828403	-0.901972	0.947261	-1.23466	1.80463

## Sheet: Native Ellipticity 0.12 mM
		5.01	9.99	15.03	19.97	25.02	30	35	39.99	44.99	50.01	54.98	60	65.01	70.02	75.01	79.99	85.04
	300	0.038364	0.099652	0.057944	0.099609	0.117201	-0.016759	0.02764	0.021096	-0.058277	0.000767	0.002075	0.00294	-0.147641	7.9e-05	0.010232	0.002285	0.003703
	299.5	0.040853	0.09762	0.057794	0.099591	0.114112	-0.015569	0.025083	0.019368	-0.057489	0.003664	0.005606	0.002591	-0.147174	0.002462	0.020848	0.015017	0.023416
	299	0.040947	0.096053	0.057572	0.098084	0.113603	-0.015413	0.023884	0.019012	-0.057903	0.000145	0.001013	0.004534	-0.147575	0.000783	0.011715	0.01047	0.005331
	298.5	0.041155	0.095458	0.057124	0.098029	0.112549	-0.015912	0.022366	0.017901	-0.059364	4.6e-05	0.000434	8.7e-05	-0.147787	1.3e-05	0.000234	0.005321	0.000481
	298	0.040697	0.094016	0.05726	0.097404	0.112021	-0.015932	0.02018	0.017025	-0.059559	2.7e-05	0.010595	0.002028	-0.148721	0.007913	0.001286	0.003735	0.011199
	297.5	0.040671	0.093159	0.056405	0.096429	0.111089	-0.016115	0.019448	0.016611	-0.06122	0.000189	0.00023	0.001554	-0.148949	0.001981	0.004548	0.007977	0.003385
	297	0.041183	0.092191	0.056132	0.09574	0.110776	-0.015987	0.017219	0.015927	-0.061128	0.000924	0.001951	0.008149	-0.148878	0.007681	0.010741	0.010509	0.008553
	296.5	0.041029	0.091423	0.055487	0.094484	0.109903	-0.016242	0.015729	0.014387	-0.062445	0.013099	0.010749	0.000632	-0.150024	0.005212	0.013396	0.006219	0.013263
	296	0.040304	0.090464	0.055396	0.093997	0.108928	-0.016398	0.014768	0.014192	-0.063207	0.006091	0.000246	0.002325	-0.149784	0.001873	0.009547	0.013151	0.007252
	295.5	0.040414	0.089317	0.054945	0.092434	0.108084	-0.016828	0.013339	0.013296	-0.063686	0.003634	0.008604	0.012615	-0.150645	0.013306	0.017353	0.012341	0.015123
	295	0.039962	0.088555	0.054328	0.092434	0.106696	-0.016753	0.010982	0.011863	-0.064536	0.004211	0.00215	0.000939	-0.15116	0.000472	0.003912	0.016365	0.005207
	294.5	0.039949	0.087438	0.054732	0.091244	0.106274	-0.016898	0.0094	0.011232	-0.065352	0.003156	0.00873	0.005478	-0.151658	0.015131	0.001854	0.015997	0.019386
	294	0.03986	0.086505	0.054237	0.090365	0.105425	-0.016389	0.007885	0.010277	-0.066329	0.001617	0.000535	0.000367	-0.151727	0.00103	0.017711	0.011269	0.001684
	293.5	0.039387	0.085993	0.053699	0.089642	0.104357	-0.017179	0.00639	0.009678	-0.067061	0.010268	0.002046	0.001775	-0.152516	0.00974	0.012704	0.004734	0.013366
	293	0.039994	0.084865	0.053548	0.088745	0.103917	-0.01662	0.005329	0.009478	-0.068301	0.002668	0.001347	0.003877	-0.152749	0.00123	0.017192	0.012688	0.004358
	292.5	0.039796	0.084562	0.052682	0.08815	0.103279	-0.01676	0.004032	0.008744	-0.06844	0.016688	0.020076	0.012168	-0.152819	0.015871	0.018934	0.013159	0.022258
	292	0.039804	0.083668	0.052975	0.086818	0.102425	-0.016818	0.001778	0.007404	-0.069638	0.005894	0.008271	0.010677	-0.153182	0.009225	0.022954	0.02107	0.010959
	291.5	0.039295	0.082592	0.052298	0.086283	0.101007	-0.016777	0.000538	0.006442	-0.070262	0.009459	0.003235	0.002559	-0.153784	0.0018	0.014361	0.000975	0.020243
	291	0.039092	0.080938	0.052319	0.085202	0.10041	-0.016815	-0.000536	0.006129	-0.070654	0.003985	0.006527	0.002327	-0.153649	0.005603	0.017448	0.013004	0.009497
	290.5	0.039128	0.080535	0.051149	0.08421	0.099359	-0.017745	-0.002357	0.004501	-0.071513	0.01606	0.017198	0.001992	-0.153979	0.000471	0.009551	0.021204	0.018315
	290	0.038457	0.079017	0.051764	0.084022	0.099235	-0.017218	-0.003818	0.004311	-0.073046	0.005347	0.005624	0.000943	-0.154399	0.003424	0.02407	0.005266	0.008924
	289.5	0.03904	0.078726	0.051355	0.082726	0.097736	-0.017551	-0.005297	0.003804	-0.073548	0.002638	0.010244	0.001589	-0.155078	0.005453	0.027371	0.014833	0.012704
	289	0.038232	0.077199	0.050232	0.08252	0.096956	-0.017798	-0.00726	0.002745	-0.074353	0.002651	0.005407	0.005242	-0.155915	0.005058	0.018258	0.028733	0.009806
	288.5	0.038343	0.077069	0.049794	0.081828	0.09648	-0.017144	-0.008657	0.002089	-0.074998	0.009322	0.009363	0.009575	-0.155823	0.005253	0.006102	0.02142	0.009858
	288	0.03871	0.076224	0.049899	0.080733	0.094948	-0.017327	-0.010276	0.000616	-0.075863	0.00852	0.005343	0.015339	-0.156398	0.009366	0.016015	0.011189	0.01541
	287.5	0.037964	0.074806	0.049112	0.079514	0.09411	-0.017376	-0.011761	-0.00041	-0.076378	0.006708	0.009822	0.009101	-0.156331	0.004418	0.008917	0.027108	0.012299
	287	0.038253	0.074287	0.048806	0.078896	0.094205	-0.018156	-0.012835	-0.000544	-0.07719	0.001795	0.002447	0.01354	-0.157543	0.006045	0.013806	0.029151	0.017302
	286.5	0.037981	0.073211	0.04894	0.078461	0.093432	-0.018024	-0.014897	-0.00165	-0.078646	0.005114	0.001805	0.002788	-0.157491	0.000874	0.032354	0.028313	0.007206
	286	0.038074	0.071582	0.048201	0.077459	0.091835	-0.018041	-0.016334	-0.002875	-0.078697	0.016848	0.022634	0.015027	-0.157669	0.01716	0.000624	0.025813	0.024567
	285.5	0.03745	0.070858	0.048362	0.076272	0.090965	-0.017987	-0.018082	-0.003413	-0.079867	0.009096	0.00049	0.012411	-0.158078	0.002738	0.018717	0.00122	0.017035
	285	0.037261	0.070038	0.048096	0.075844	0.090763	-0.018021	-0.019374	-0.004487	-0.080777	0.001735	0.001544	0.000281	-0.158246	0.000122	0.025225	0.00119	0.00209
	284.5	0.037584	0.069148	0.047918	0.074452	0.089901	-0.018743	-0.020993	-0.004755	-0.080977	0.015929	0.002603	0.008285	-0.159302	0.006091	0.031376	0.011923	0.020862
	284	0.03771	0.068233	0.047425	0.074078	0.088971	-0.018172	-0.022148	-0.005335	-0.082701	0.013352	0.011715	0.005873	-0.159806	0.011872	0.007446	0.010952	0.025513
	283.5	0.037446	0.067784	0.046437	0.072934	0.088072	-0.018122	-0.024218	-0.00602	-0.083232	0.010035	0.017579	0.009256	-0.160141	0.015733	0.023108	0.02681	0.01963
	283	0.037033	0.066752	0.046095	0.072534	0.087152	-0.018839	-0.025277	-0.007655	-0.084175	0.002328	0.008088	0.014521	-0.160244	0.002754	0.018331	0.017644	0.03353
	282.5	0.037235	0.065679	0.04561	0.071881	0.086303	-0.018986	-0.027301	-0.008275	-0.084472	0.004167	0.004961	0.003556	-0.160727	0.022272	0.005926	0.000349	0.024966
	282	0.037068	0.06487	0.045651	0.071188	0.085495	-0.019166	-0.028678	-0.009186	-0.085691	0.008199	0.014712	0.016758	-0.160625	0.027184	0.014942	0.037613	0.030445
	281.5	0.036887	0.063444	0.045422	0.069676	0.084279	-0.019249	-0.030739	-0.01005	-0.086265	0.003917	0.002302	0.000791	-0.161297	0.004284	0.016969	0.012855	0.00451
	281	0.036725	0.062783	0.044687	0.069058	0.083445	-0.019305	-0.031707	-0.010295	-0.087489	0.001576	0.00402	0.002071	-0.161335	0.002424	0.025687	0.029068	0.006202
	280.5	0.036735	0.06137	0.045035	0.067899	0.083458	-0.018528	-0.033272	-0.011038	-0.087872	0.003969	0.007755	0.009586	-0.162563	0.024303	0.000298	0.025935	0.028195
	280	0.036622	0.061263	0.044008	0.067705	0.081934	-0.018795	-0.035171	-0.0121	-0.088959	0.020719	0.002895	0.005891	-0.162719	0.008288	0.009837	0.02073	0.03279
	279.5	0.035818	0.059776	0.043841	0.067133	0.080938	-0.019459	-0.036234	-0.012929	-0.089612	0.000272	0.001198	0.001233	-0.163471	8e-05	0.013254	0.037159	0.001418
	279	0.036509	0.059263	0.043251	0.066235	0.080764	-0.018887	-0.038096	-0.014089	-0.090183	0.009936	0.012281	0.011771	-0.163413	0.001655	0.01803	0.013903	0.014048
	278.5	0.036027	0.057763	0.043501	0.06561	0.079148	-0.018889	-0.039932	-0.014269	-0.091392	0.003228	0.002266	0.00304	-0.163436	0.002665	0.01871	0.022973	0.004664
	278	0.0353	0.057015	0.042711	0.064444	0.078681	-0.019546	-0.041463	-0.015423	-0.09151	0.009874	0.022898	0.022049	-0.164575	0.01439	0.036453	0.041371	0.03475
	277.5	0.0358	0.055665	0.042428	0.063125	0.077629	-0.019066	-0.042334	-0.015881	-0.092166	0.022416	0.003723	0.034309	-0.16504	0.012421	0.021001	0.033179	0.045703
	277	0.035501	0.05522	0.041984	0.06273	0.07666	-0.019163	-0.044656	-0.016759	-0.093213	0.000381	0.006792	0.01468	-0.164837	0.012581	0.002217	0.024307	0.015201
	276.5	0.034923	0.054052	0.041891	0.061768	0.076528	-0.019886	-0.046184	-0.017634	-0.093834	0.023147	0.031643	0.017852	-0.165504	0.035191	0.037956	0.037764	0.040495
	276	0.035016	0.05295	0.041349	0.061543	0.075958	-0.019348	-0.04744	-0.01859	-0.095325	0.002677	0.004282	0.002783	-0.165291	0.002376	0.027958	0.04074	0.005749
	275.5	0.034865	0.051939	0.041517	0.059941	0.074318	-0.020191	-0.04831	-0.019374	-0.095641	0.009767	0.003719	0.028516	-0.166114	0.013701	2.4e-05	0.039183	0.030199
	275	0.034523	0.051024	0.04041	0.059376	0.073915	-0.019572	-0.050678	-0.0203	-0.096669	0.019393	0.026726	0.023843	-0.16644	0.016179	0.048907	0.014552	0.027033
	274.5	0.034611	0.050459	0.040748	0.058553	0.073047	-0.019836	-0.051721	-0.020992	-0.097019	0.026621	0.016794	0.011906	-0.16658	0.018095	0.044054	0.033324	0.038876
	274	0.034713	0.049682	0.039906	0.058194	0.071972	-0.019909	-0.05319	-0.022097	-0.098521	0.015744	0.008438	0.023419	-0.167544	0.017224	0.046783	0.013362	0.035543
	273.5	0.034129	0.048749	0.039868	0.056725	0.071155	-0.019934	-0.055179	-0.023033	-0.099254	0.012034	0.017646	0.001432	-0.168129	0.034929	0.019318	0.002788	0.048805
	273	0.034284	0.04804	0.039583	0.056633	0.070554	-0.02	-0.056975	-0.023764	-0.099326	0.021722	0.011447	0.014064	-0.168502	0.021643	0.045335	0.052377	0.041715
	272.5	0.03426	0.04701	0.0393	0.055622	0.069402	-0.020334	-0.057861	-0.024795	-0.100807	0.007265	0.012853	7.8e-05	-0.168494	0.008601	0.029828	0.044933	0.013404
	272	0.034451	0.045912	0.038799	0.05487	0.068795	-0.020295	-0.059875	-0.025019	-0.100934	0.000168	0.006902	0.010775	-0.16925	0.017673	0.011075	0.003885	0.021712
	271.5	0.034425	0.044483	0.03869	0.05377	0.067998	-0.020232	-0.061037	-0.026386	-0.102029	0.026013	0.010331	0.011236	-0.169048	0.018034	0.045422	0.003176	0.049279
	271	0.033481	0.043766	0.038294	0.053229	0.066965	-0.020431	-0.062345	-0.026661	-0.102553	0.00179	0.014622	0.003091	-0.169702	0.007889	0.012124	0.002617	0.019381
	270.5	0.03372	0.043376	0.037787	0.052209	0.066392	-0.020976	-0.06388	-0.027948	-0.103736	0.047677	0.034906	0.006351	-0.170256	0.033019	0.016051	0.037184	0.051191
	270	0.033566	0.041799	0.037477	0.050899	0.065113	-0.020694	-0.065629	-0.028101	-0.104337	0.01231	0.031439	0.024899	-0.170567	0.014811	0.023294	0.035578	0.040201
	269.5	0.033651	0.041012	0.03703	0.050373	0.065144	-0.020807	-0.066845	-0.029695	-0.105646	0.005428	0.002029	0.027475	-0.171109	0.007258	0.032166	0.006928	0.029504
	269	0.033399	0.040349	0.036843	0.04962	0.063965	-0.021461	-0.068363	-0.029885	-0.106588	0.000503	0.000121	0.000786	-0.171548	0.00116	0.018712	0.026176	0.001724
	268.5	0.033123	0.039667	0.036798	0.048764	0.062689	-0.021568	-0.070094	-0.03072	-0.107232	0.007669	0.02567	0.033981	-0.171229	0.019277	0.054878	0.008577	0.033991
	268	0.032993	0.038627	0.035874	0.048081	0.06174	-0.021392	-0.072196	-0.031515	-0.107507	0.000453	0.001017	0.001057	-0.172511	0.001238	0.012289	0.032592	0.001866
	267.5	0.032609	0.037276	0.035863	0.047221	0.060959	-0.020865	-0.073884	-0.032766	-0.108733	0.00179	0.003365	0.02061	-0.17215	0.000289	0.048492	0.030121	0.025942
	267	0.032547	0.037023	0.035093	0.045937	0.06089	-0.021566	-0.07551	-0.033587	-0.1089	0.001011	0.005398	0.003817	-0.172349	0.005647	0.038429	0.034892	0.006172
	266.5	0.032816	0.03524	0.034549	0.045739	0.060004	-0.021977	-0.076135	-0.034212	-0.110097	0.028177	0.010888	0.024199	-0.173667	0.031361	0.015462	0.000996	0.03932
	266	0.03221	0.034537	0.034178	0.044754	0.058619	-0.021415	-0.077646	-0.03485	-0.110936	0.009606	0.006326	0.028172	-0.173557	0.030763	0.000133	0.010754	0.035006
	265.5	0.032143	0.03387	0.034154	0.044123	0.058068	-0.021942	-0.079555	-0.035911	-0.111833	0.000693	0.018922	0.001508	-0.173577	0.010323	0.003884	0.003141	0.021108
	265	0.032368	0.032575	0.03352	0.043283	0.057324	-0.022223	-0.081165	-0.036729	-0.112322	0.008002	0.007681	0.007027	-0.173983	0.022793	0.019352	0.001769	0.027366
	264.5	0.03218	0.031443	0.033749	0.042805	0.056055	-0.022303	-0.082988	-0.037499	-0.113107	0.007968	0.013083	0.032227	-0.17456	0.043693	0.028782	0.042113	0.046511
	264	0.032292	0.030588	0.033118	0.041125	0.055903	-0.02238	-0.084303	-0.038328	-0.113637	0.009373	0.035707	0.011262	-0.174841	0.00197	0.042478	0.001484	0.042176
	263.5	0.031872	0.029622	0.03315	0.040666	0.054533	-0.021712	-0.085887	-0.039351	-0.114754	0.004345	0.001903	0.004858	-0.175568	0.002728	0.042793	6.2e-05	0.010885
	263	0.031611	0.029261	0.032763	0.040259	0.054343	-0.022597	-0.087791	-0.040194	-0.11523	0.007128	0.002811	0.000753	-0.175491	0.010672	0.052021	0.034877	0.011387
	262.5	0.03138	0.028329	0.03222	0.038682	0.052685	-0.021918	-0.08847	-0.040514	-0.116647	0.018602	0.007968	0.021394	-0.176272	0.001282	0.017869	0.026982	0.022425
	262	0.031302	0.027294	0.031718	0.038101	0.052671	-0.022595	-0.090841	-0.041421	-0.117362	0.005304	0.022899	0.035094	-0.176527	0.038777	0.006891	0.025631	0.03943
	261.5	0.031431	0.025847	0.031643	0.037285	0.051104	-0.022781	-0.091559	-0.042518	-0.118338	0.015489	0.048811	0.034454	-0.177479	0.047731	0.030601	0.043152	0.054521
	261	0.030936	0.025177	0.030843	0.036663	0.050519	-0.022074	-0.093441	-0.043573	-0.118338	0.034767	0.048605	0.013033	-0.177526	0.034806	0.038246	0.048152	0.049423
	260.5	0.030745	0.024395	0.030621	0.036105	0.049284	-0.022087	-0.095039	-0.043945	-0.119528	0.037318	0.004155	0.011624	-0.177813	0.003803	0.039564	0.017383	0.044574
	260	0.030896	0.023184	0.030486	0.034815	0.04889	-0.022818	-0.096592	-0.045129	-0.120298	0.019284	0.038274	0.028232	-0.177977	0.006739	0.047991	0.020766	0.047065
	259.5	0.031298	0.02248	0.029929	0.034619	0.04828	-0.023182	-0.097904	-0.045732	-0.120809	0.002925	0.040118	0.0351	-0.178351	0.017891	0.04083	0.010457	0.044978
	259	0.031143	0.021331	0.029509	0.033812	0.047596	-0.022557	-0.099492	-0.046304	-0.122045	0.016263	0.021362	0.001535	-0.178804	0.019165	0.05629	0.020894	0.022351
	258.5	0.030701	0.02087	0.029167	0.032755	0.046495	-0.023321	-0.101282	-0.047905	-0.122693	0.021856	0.037862	0.047507	-0.17982	0.024961	0.00127	0.032716	0.049654
	258	0.030752	0.019778	0.029246	0.031935	0.045754	-0.023394	-0.102996	-0.048502	-0.123581	0.011824	0.0041	0.012108	-0.180227	0.015637	0.051386	0.054676	0.018744
	257.5	0.030881	0.019027	0.029065	0.031232	0.044626	-0.022994	-0.104261	-0.049317	-0.124716	0.002398	0.01241	0.02021	-0.180553	0.013716	0.021694	0.009115	0.023914
	257	0.030792	0.017653	0.028509	0.029665	0.043949	-0.023313	-0.106086	-0.049839	-0.125092	0.047653	0.027725	0.049471	-0.180723	0.03289	0.014761	0.031198	0.055199
	256.5	0.030533	0.016875	0.02848	0.0296	0.043181	-0.02368	-0.107893	-0.050355	-0.12615	0.003078	0.019364	0.03439	-0.180945	0.008879	0.054871	0.042261	0.041364
	256	0.030329	0.01617	0.027352	0.027981	0.042646	-0.023838	-0.109178	-0.051516	-0.126498	0.005859	0.002179	0.00633	-0.181726	0.00168	0.000935	0.042045	0.007845
	255.5	0.029608	0.015002	0.027862	0.02804	0.041686	-0.023903	-0.110026	-0.052264	-0.12731	0.051023	0.034556	0.013912	-0.181348	0.043888	0.03193	0.035773	0.058847
	255	0.029511	0.013832	0.02736	0.026508	0.040186	-0.023438	-0.112267	-0.052754	-0.128431	0.004701	0.00775	0.004351	-0.1825	0.013593	0.028881	0.051029	0.048579
	254.5	0.030104	0.013507	0.027146	0.026086	0.039681	-0.024044	-0.113531	-0.05389	-0.12947	0.010079	0.00295	0.011569	-0.182369	0.011057	0.023017	0.017161	0.014831
	254	0.029674	0.012137	0.02646	0.025249	0.038994	-0.02325	-0.115481	-0.055052	-0.129815	0.024684	0.000917	0.00522	-0.183256	0.004808	0.059553	0.028463	0.035839
	253.5	0.02937	0.011329	0.025892	0.023947	0.03776	-0.024088	-0.116848	-0.055532	-0.131188	0.010022	0.002939	0.004808	-0.183153	0.010075	0.038652	0.022222	0.016321
	253	0.028871	0.010831	0.025878	0.023591	0.037169	-0.024175	-0.118043	-0.056577	-0.131934	0.039742	0.006059	0.014243	-0.183679	0.033788	0.006334	0.057656	0.056145
	252.5	0.028762	0.009176	0.024873	0.022866	0.036414	-0.023622	-0.120065	-0.057064	-0.132496	0.040828	0.017461	0.056016	-0.184227	0.011608	0.000588	0.012049	0.058124
	252	0.029468	0.009033	0.024952	0.021982	0.035159	-0.024517	-0.120882	-0.058226	-0.132685	0.042371	0.019778	0.004343	-0.184666	0.010323	0.031153	0.004325	0.045248
	251.5	0.029155	0.007761	0.024605	0.021054	0.034708	-0.024341	-0.12235	-0.058727	-0.13438	0.007369	0.010626	0.011904	-0.185264	0.009542	0.049529	0.021983	0.013074
	251	0.029039	0.006676	0.023943	0.019884	0.033898	-0.024025	-0.124531	-0.059669	-0.134491	0.002452	0.00512	0.007646	-0.185325	0.001649	0.032399	0.023548	0.008657
	250.5	0.028506	0.006148	0.024091	0.019488	0.032993	-0.024513	-0.125547	-0.060394	-0.135109	0.014051	0.039645	0.008703	-0.185387	0.01982	0.004357	0.048124	0.048715
	250	0.028787	0.005317	0.024043	0.019097	0.031805	-0.02399	-0.12736	-0.061729	-0.135863	0.008926	0.009598	0.003149	-0.186182	0.004095	0.037342	0.001856	0.011434
	249.5	0.02813	0.004341	0.0228	0.017868	0.031044	-0.024436	-0.128819	-0.062111	-0.137372	0.017929	0.025	0.021136	-0.187021	0.010525	0.006038	0.02512	0.04083
	249	0.028565	0.002655	0.022914	0.017088	0.030768	-0.024331	-0.13028	-0.062727	-0.138062	0.008937	0.012907	0.006596	-0.186976	0.007809	0.046549	0.039308	0.015021
	248.5	0.027876	0.001825	0.022709	0.01665	0.029975	-0.024489	-0.132397	-0.064281	-0.13822	0.002573	0.023714	0.016712	-0.187346	0.011647	0.048343	0.00926	0.034358
	248	0.027667	0.001465	0.022052	0.015909	0.028702	-0.025192	-0.133304	-0.064163	-0.139303	0.010505	0.01087	0.011338	-0.187962	0.001311	0.047749	0.001948	0.025885
	247.5	0.027577	7.6e-05	0.021991	0.014353	0.028459	-0.025222	-0.135014	-0.065371	-0.13986	0.045368	0.051544	3.6e-05	-0.188159	0.051926	0.040712	0.013718	0.052557
	247	0.027543	-0.000738	0.02183	0.013365	0.027395	-0.025203	-0.136339	-0.066467	-0.14097	0.033072	0.054982	0.047009	-0.188798	0.055075	0.004091	0.05813	0.056464
	246.5	0.027096	-0.001726	0.020871	0.012761	0.026551	-0.025341	-0.138105	-0.067588	-0.141885	0.030388	0.023753	0.021965	-0.188404	0.03065	0.01125	0.027415	0.056529
	246	0.027478	-0.002799	0.021055	0.012483	0.026018	-0.025	-0.139974	-0.068276	-0.142659	0.017218	0.033403	0.003294	-0.189431	0.030679	0.043908	0.055202	0.037082
	245.5	0.027352	-0.003769	0.020439	0.011496	0.02461	-0.025457	-0.140985	-0.068321	-0.14397	0.001283	0.001688	0.00107	-0.189414	0.001982	0.04961	0.061395	0.002056
	245	0.027683	-0.004135	0.020561	0.01092	0.02381	-0.025066	-0.143335	-0.069459	-0.143797	0.033201	0.039805	0.030215	-0.190187	0.012762	0.050226	0.01678	0.04702
	244.5	0.027524	-0.005323	0.020027	0.009744	0.022825	-0.0254	-0.144565	-0.070502	-0.145111	0.021993	0.020331	0.023553	-0.190226	0.013996	0.048719	0.040147	0.024814
	244	0.02693	-0.005966	0.019077	0.008813	0.022591	-0.025528	-0.146106	-0.071171	-0.14629	0.000533	4.5e-05	0.000574	-0.191041	0.00077	0.04426	0.026215	0.000835
	243.5	0.027087	-0.007015	0.01866	0.008201	0.021304	-0.025099	-0.147371	-0.071543	-0.146839	0.000255	0.003438	0.000143	-0.191527	0.002095	0.000133	0.025807	0.003564
	243	0.026339	-0.008236	0.018865	0.006774	0.020744	-0.026044	-0.149163	-0.072417	-0.147179	0.046191	0.034446	0.036155	-0.191911	0.038843	0.015824	0.001337	0.050444
	242.5	0.026118	-0.008752	0.018625	0.006571	0.019907	-0.025583	-0.150223	-0.073992	-0.147803	0.011419	0.000899	0.016139	-0.192145	0.003164	0.060721	0.00561	0.017699
	242	0.026629	-0.010483	0.017683	0.005479	0.019242	-0.025731	-0.152201	-0.07415	-0.149182	0.052284	0.04631	0.036944	-0.192691	0.053261	0.007935	0.03007	0.062655
	241.5	0.026169	-0.010692	0.017759	0.00511	0.018133	-0.026159	-0.153561	-0.075105	-0.149933	0.010808	0.013896	0.016189	-0.193137	0.012872	0.022421	0.044798	0.017666
	241	0.048381	0.011094	0.043859	0.022813	0.030172	-0.002481	-0.130328	-0.056605	-0.137949	0.00322	0.000316	0.005915	-0.193918	0.00382	0.037142	0.027632	0.006693
	240.5	0.074339	0.037101	0.073415	0.044735	0.048367	0.024089	-0.102087	-0.035649	-0.12311	0.021495	0.031428	0.011144	-0.192948	0.044499	0.006051	0.023937	0.054704
	240	0.105054	0.068467	0.107318	0.070971	0.071485	0.053198	-0.069908	-0.010005	-0.10376	0.007968	0.012375	0.001746	-0.188223	0.013521	0.02897	0.034937	0.019732
	239.5	0.13919	0.105377	0.14785	0.104827	0.098018	0.085281	-0.034348	0.020301	-0.078389	0.017585	0.026682	0.031862	-0.179834	0.031241	0.030504	0.030607	0.041615
	239	0.179458	0.147382	0.196155	0.142723	0.130816	0.122223	0.007416	0.057396	-0.048316	0.032602	0.015752	0.003619	-0.166757	0.018094	0.034384	0.061429	0.049037
	238.5	0.225407	0.195481	0.24881	0.186384	0.168175	0.163197	0.053223	0.096906	-0.013565	0.00276	0.002409	0.002821	-0.150994	0.001015	0.047386	0.031175	0.003933
	238	0.27654	0.248241	0.305516	0.233255	0.21042	0.207325	0.10347	0.141934	0.024581	0.003338	0.002147	0.002492	-0.131633	0.001178	0.010014	0.061805	0.003431
	237.5	0.335199	0.30669	0.366729	0.282706	0.259014	0.258474	0.156813	0.190133	0.066442	0.01222	0.025274	0.017838	-0.108761	0.015223	0.044587	0.006386	0.026644
	237	0.402072	0.372111	0.432539	0.338772	0.313263	0.315154	0.215651	0.241583	0.114361	0.010442	0.013008	0.00527	-0.08253	0.005143	0.061482	0.015236	0.013863
	236.5	0.47577	0.443782	0.503558	0.401784	0.37262	0.377767	0.279157	0.298938	0.165158	0.038653	0.05466	0.009034	-0.052672	0.016631	0.006092	0.058056	0.061989
	236	0.555963	0.522773	0.580155	0.471775	0.439535	0.445884	0.347076	0.361131	0.22223	0.024399	0.020572	0.007337	-0.019908	0.003736	0.005416	0.011723	0.042614
	235.5	0.644997	0.608433	0.662254	0.548785	0.512087	0.519055	0.418311	0.428613	0.285239	0.191112	0.121314	0.006237	-0.000132	0.028677	0.050807	0.019846	0.034886
	235	0.738439	0.700214	0.748112	0.632943	0.589791	0.595982	0.493145	0.500253	0.352993	0.248466	0.166863	0.028226	0.000598	0.028336	0.02436	0.052398	0.045001
	234.5	0.83877	0.798301	0.839948	0.724885	0.674775	0.67879	0.572263	0.576641	0.424409	0.311819	0.21684	0.065273	0.007801	0.013215	0.026578	0.002207	0.016771
	234	0.945794	0.905581	0.939319	0.823287	0.768138	0.767632	0.655842	0.65818	0.500387	0.380105	0.268609	0.105349	0.00197	0.019595	0.014434	0.045466	0.024853
	233.5	1.05956	1.01809	1.04596	0.927325	0.869477	0.861331	0.743224	0.74237	0.578771	0.452622	0.323057	0.148383	0.0055714	0.00033	0.003322	0.022671	0.01416
	233	1.18029	1.13782	1.15915	1.03682	0.978532	0.961309	0.835983	0.83038	0.660235	0.527741	0.381083	0.193692	0.012121	0.020406	0.017776	0.032552	0.024081
	232.5	1.3054	1.2635	1.27551	1.15195	1.0922	1.06522	0.930099	0.917931	0.742496	0.603411	0.439584	0.240742	0.016898	0.010223	0.000684	0.035704	0.025531
	232	1.43478	1.39188	1.39299	1.2696	1.25891	1.17294	1.02475	1.00954	0.824252	0.680195	0.498503	0.28814	0.019445	0.000231	0.027515	0.021054	0.018454
	231.5	1.5658	1.52352	1.51321	1.38859	1.45771	1.28147	1.12003	1.1014	0.908281	0.754253	0.557006	0.332908	0.061822	7.5e-05	0.031298	0.008552	0.000219
	231	1.69856	1.65589	1.63625	1.51087	1.647	1.41945	1.24515	1.19409	0.992244	0.827177	0.614057	0.37419	0.103164	0.016385	0.028463	0.021499	0.018629
	230.5	1.8321	1.78731	1.75957	1.63461	1.81621	1.55619	1.36861	1.2855	1.07375	0.896488	0.670022	0.414104	0.140675	0.004982	0.013595	0.011087	0.02349
	230	1.96286	1.91712	1.87983	1.78311	1.98454	1.69885	1.49815	1.3735	1.15047	0.960277	0.72234	0.447653	0.173087	-0.001667	-0.002582	-0.000464	-0.002994
	229.5	2.08925	2.04191	1.99504	1.9472	2.05791	1.79466	1.58144	1.45663	1.22223	0.997651	0.729729	0.453257	0.19698	0.113747	0.108222	0.039387	-0.045287
	229	2.20799	2.1604	2.10107	2.08325	2.15395	1.96298	1.69768	1.5312	1.28398	1.06621	0.728269	0.460116	0.212092	0.112437	0.099013	0.028244	-0.069372
	228.5	2.31872	2.26915	2.25106	2.22077	2.25312	2.06384	1.76493	1.5966	1.33636	1.00606	0.71864	0.458853	0.215377	0.106646	0.08056	0.006998	-0.115833
	228	2.41919	2.41684	2.3522	2.35613	2.31134	2.12191	1.8107	1.65159	1.35965	1.03259	0.698552	0.452069	0.208948	0.082137	0.02076	-0.024251	-0.151928
	227.5	2.50487	2.51024	2.49159	2.49766	2.36694	2.18757	1.87354	1.66149	1.36905	1.04203	0.673948	0.443866	0.189607	0.042194	0.001342	-0.126793	-0.201024
	227	2.57519	2.58851	2.57448	2.56455	2.44656	2.22834	1.94897	1.65535	1.35413	1.03526	0.666615	0.426821	0.158227	-0.07365	-0.090655	-0.194761	-0.26334
	226.5	2.62936	2.63806	2.64958	2.61283	2.45826	2.27148	1.95786	1.63292	1.34292	1.01218	0.621561	0.376684	0.12461	-0.119344	-0.195173	-0.338481	-0.343609
	226	2.66426	2.66289	2.66234	2.63158	2.46209	2.2788	1.98585	1.61975	1.33174	1.01034	0.638892	0.31922	0.00822	-0.18937	-0.36408	-0.427924	-0.442716
	225.5	2.67649	2.65889	2.6596	2.62925	2.44515	2.23294	1.89142	1.6107	1.30147	1.00958	0.609653	0.284269	-0.093547	-0.199937	-0.416283	-0.523993	-0.56249
	225	2.6672	2.65876	2.59202	2.58288	2.36216	2.18615	1.83264	1.58462	1.29875	0.926659	0.569209	0.251346	-0.117366	-0.255378	-0.554207	-0.615373	-0.699841
	224.5	2.63233	2.59188	2.51975	2.49334	2.29773	2.11508	1.69142	1.5437	1.21322	0.820501	0.5449	0.151052	-0.167236	-0.325401	-0.625194	-0.755177	-0.855894
	224	2.5712	2.51733	2.43184	2.38603	2.15634	2.01721	1.51629	1.43653	1.10346	0.692249	0.419433	0.035393	-0.196085	-0.475684	-0.750118	-0.814369	-1.02823
	223.5	2.47921	2.40384	2.31485	2.22799	2.05376	1.89001	1.38174	1.30046	0.969074	0.540091	0.269003	-0.102439	-0.335705	-0.646724	-0.852323	-0.992459	-1.22127
	223	2.35885	2.21926	2.15901	2.037	1.91924	1.63253	1.17062	1.13543	0.807036	0.362471	0.091179	-0.267064	-0.415645	-0.839756	-0.966812	-1.19154	-1.43765
	222.5	2.20818	2.04893	2.00211	1.76027	1.75283	1.44442	0.9794	0.938245	0.617143	0.156259	-0.114499	-0.454655	-0.617238	-1.05434	-1.16181	-1.40966	-1.677
	222	2.02249	1.84232	1.81002	1.54932	1.54971	1.12073	0.757968	0.708977	0.396681	-0.079183	-0.348565	-0.669667	-0.841851	-1.29138	-1.37979	-1.64962	-1.93783
	221.5	1.79874	1.59722	1.57611	1.30458	1.30642	0.862036	0.501192	0.444756	0.142701	-0.347249	-0.611877	-0.912218	-1.09219	-1.55112	-1.61927	-1.91201	-2.21935
	221	1.54011	1.31631	1.30386	1.02483	1.02588	0.568742	0.211387	0.152384	-0.140271	-0.640183	-0.89849	-1.1795	-1.36457	-1.8313	-1.87919	-2.19353	-2.5186
	220.5	1.24411	0.99861	0.995593	0.711557	0.708553	0.244771	-0.107103	-0.167053	-0.452103	-0.956774	-1.2091	-1.47198	-1.66026	-2.12981	-2.15941	-2.49407	-2.83564
	220	0.914437	0.646489	0.653884	0.365305	0.358134	-0.110984	-0.452569	-0.513455	-0.788681	-1.29695	-1.53793	-1.7886	-1.97747	-2.44617	-2.45854	-2.81018	-3.16867
	219.5	0.551409	0.261987	0.280837	-0.012626	-0.022271	-0.494977	-0.821367	-0.888657	-1.14929	-1.65919	-1.88884	-2.12468	-2.31332	-2.77901	-2.7752	-3.14074	-3.51625
	219	0.157852	-0.149339	-0.122501	-0.418328	-0.433096	-0.901932	-1.21307	-1.28854	-1.53408	-2.03951	-2.26152	-2.47714	-2.66684	-3.12703	-3.10689	-3.48532	-3.87344
	218.5	-0.263908	-0.586196	-0.552763	-0.850905	-0.867573	-1.33201	-1.62184	-1.70765	-1.93909	-2.43686	-2.65075	-2.8449	-3.03605	-3.48461	-3.45076	-3.84186	-4.23889
	218	-0.708288	-1.04266	-1.00462	-1.30186	-1.32478	-1.77697	-2.04654	-2.14064	-2.35752	-2.84422	-3.05072	-3.22447	-3.41641	-3.85119	-3.80354	-4.20399	-4.6072
	217.5	-1.17436	-1.51574	-1.47497	-1.76961	-1.79882	-2.23654	-2.4867	-2.58605	-2.78689	-3.25997	-3.46172	-3.61639	-3.80152	-4.22675	-4.16397	-4.56856	-4.97851
	217	-1.65571	-2.00512	-1.9591	-2.24923	-2.28559	-2.70558	-2.93664	-3.0409	-3.22554	-3.68302	-3.8792	-4.01477	-4.18847	-4.60574	-4.53057	-4.93386	-5.35284
	216.5	-2.1482	-2.50621	-2.45066	-2.73428	-2.77747	-3.18001	-3.39395	-3.5003	-3.66707	-4.10806	-4.29802	-4.41163	-4.57789	-4.98478	-4.89588	-5.29504	-5.72415
	216	-2.65075	-3.01181	-2.95032	-3.22166	-3.27299	-3.65728	-3.85533	-3.96198	-4.1095	-4.53298	-4.71434	-4.80556	-4.96339	-5.36089	-5.25882	-5.65213	-6.08884
	215.5	-3.15283	-3.51412	-3.4503	-3.70662	-3.76573	-4.12949	-4.31365	-4.41703	-4.54772	-4.95223	-5.12346	-5.19532	-5.34251	-5.72655	-5.61185	-6.0008	-6.44276
	215	-3.64972	-4.01111	-3.94445	-4.18638	-4.2503	-4.59119	-4.76273	-4.86196	-4.97525	-5.35616	-5.52018	-5.57641	-5.71086	-6.07944	-5.95538	-6.33841	-6.78367
	214.5	-4.13794	-4.49838	-4.42975	-4.6569	-4.72475	-5.04368	-5.20047	-5.2959	-5.39365	-5.74953	-5.90693	-5.94826	-6.07057	-6.41991	-6.28957	-6.66203	-7.11225
	214	-4.61368	-4.97335	-4.90197	-5.11637	-5.18501	-5.4826	-5.62431	-5.71772	-5.79831	-6.12939	-6.27771	-6.30984	-6.41858	-6.74789	-6.61288	-6.97199	-7.42417
	213.5	-5.07786	-5.43174	-5.36036	-5.56138	-5.63005	-5.9055	-6.0318	-6.12638	-6.18854	-6.49363	-6.63596	-6.65812	-6.75344	-7.06314	-6.92349	-7.26735	-7.7188
	213	-5.52607	-5.87241	-5.80454	-5.99023	-6.06026	-6.31134	-6.42199	-6.51753	-6.56294	-6.84139	-6.98109	-6.99008	-7.07276	-7.36288	-7.22047	-7.54729	-7.99444
	212.5	-5.9579	-6.29314	-6.2281	-6.39781	-6.47164	-6.69568	-6.79148	-6.88553	-6.91773	-7.16989	-7.30564	-7.30471	-7.3755	-7.64281	-7.503	-7.81158	-8.25224
	212	-6.3687	-6.69319	-6.63358	-6.78564	-6.86468	-7.05942	-7.14131	-7.23275	-7.25302	-7.47939	-7.6095	-7.6043	-7.66031	-7.90727	-7.77069	-8.05617	-8.4909
	211.5	-6.76056	-7.07151	-7.01827	-7.1539	-7.23522	-7.40225	-7.47189	-7.55872	-7.56837	-7.76992	-7.89358	-7.88945	-7.92789	-8.15448	-8.02439	-8.28355	-8.71239
	211	-7.13109	-7.42972	-7.38329	-7.49974	-7.58346	-7.7248	-7.78202	-7.86591	-7.86783	-8.04316	-8.15908	-8.15723	-8.17967	-8.38244	-8.26393	-8.49448	-8.91821
	210.5	-7.479	-7.76206	-7.72354	-7.82008	-7.90564	-8.0233	-8.06774	-8.14733	-8.14626	-8.29328	-8.40243	-8.40102	-8.41231	-8.58957	-8.484	-8.68391	-9.10263
	210	-7.80183	-8.0616	-8.03426	-8.10853	-8.19738	-8.29304	-8.3267	-8.39948	-8.39738	-8.51859	-8.61785	-8.61992	-8.62279	-8.77318	-8.68021	-8.85248	-9.26295
	209.5	-8.09443	-8.32982	-8.31421	-8.36925	-8.4568	-8.53241	-8.5558	-8.62167	-8.61982	-8.71603	-8.80601	-8.81105	-8.80748	-8.93279	-8.85331	-8.99953	-9.4015
	209	-8.35893	-8.56843	-8.56068	-8.60223	-8.68539	-8.7424	-8.75676	-8.81624	-8.81508	-8.88943	-8.96776	-8.977	-8.97063	-9.07034	-9.00483	-9.12689	-9.52048
	208.5	-8.59674	-8.77982	-8.77787	-8.80847	-8.8853	-8.92683	-8.93126	-8.98726	-8.98517	-9.04176	-9.10971	-9.12101	-9.11251	-9.19283	-9.14011	-9.23785	-9.62327
	208	-8.80758	-8.96167	-8.96614	-8.98734	-9.0575	-9.08545	-9.08315	-9.13468	-9.1317	-9.17431	-9.23216	-9.24236	-9.22178	-9.29858	-9.25175	-9.32207	-9.69249
	207.5	-8.98853	-9.11771	-9.12589	-9.14001	-9.20258	-9.21902	-9.21058	-9.25879	-9.25587	-9.28602	-9.33673	-9.33096	-9.30608	-9.38549	-9.33692	-9.3719	-9.7233
	207	-9.14225	-9.24733	-9.2586	-9.26523	-9.32298	-9.32872	-9.31718	-9.36075	-9.36014	-9.37653	-9.40778	-9.39855	-9.36646	-9.4426	-9.39743	-9.39268	-9.69723
	206.5	-9.2678	-9.35065	-9.36477	-9.36403	-9.41546	-9.41523	-9.40315	-9.43726	-9.44099	-9.44773	-9.42881	-9.42963	-9.38676	-9.46912	-9.42958	-9.35886	-9.60981
	206	-9.3659	-9.42987	-9.44459	-9.43792	-9.48463	-9.47998	-9.46787	-9.49419	-9.4989	-9.4949	-9.42567	-9.4388	-9.37445	-9.47437	-9.41691	-9.26391	-9.45728
	205.5	-9.44151	-9.48906	-9.50264	-9.49294	-9.5299	-9.52538	-9.51282	-9.53417	-9.53608	-9.51188	-9.3756	-9.42643	-9.29893	-9.46258	-9.33614	-9.14491	-9.27327
	205	-9.49736	-9.53084	-9.54085	-9.52876	-9.55938	-9.55332	-9.53761	-9.54069	-9.55012	-9.49409	-9.28644	-9.37945	-9.18325	-9.41133	-9.21288	-9.01703	-9.02624
	204.5	-9.53464	-9.55679	-9.56396	-9.55032	-9.57435	-9.56598	-9.54609	-9.53275	-9.53984	-9.42908	-9.15531	-9.28746	-9.02095	-9.32184	-9.04852	-8.87261	-8.74913
	204	-9.55544	-9.56489	-9.57196	-9.55846	-9.5759	-9.56632	-9.49657	-9.50536	-9.49704	-9.31415	-8.98663	-9.14389	-8.8256	-9.19596	-8.81807	-8.68913	-8.4327
	203.5	-9.55903	-9.56377	-9.56759	-9.54975	-9.56222	-9.55375	-9.40229	-9.46362	-9.42498	-9.15086	-8.76033	-8.93533	-8.59224	-9.00834	-8.52521	-8.47528	-8.07083
	203	-9.55042	-9.55229	-9.53243	-9.52862	-9.52149	-9.533	-9.27364	-9.39778	-9.33754	-8.94649	-8.4689	-8.69645	-8.31215	-8.77148	-8.19676	-8.20372	-7.69809
	202.5	-9.53085	-9.53167	-9.46186	-9.483	-9.45225	-9.48818	-9.13353	-9.31242	-9.22784	-8.71431	-8.11801	-8.41561	-7.99028	-8.50689	-7.85016	-7.86849	-7.29147
	202	-9.49814	-9.49817	-9.34584	-9.39994	-9.35394	-9.38372	-8.9656	-9.175	-9.09398	-8.44298	-7.71017	-8.08192	-7.60528	-8.22861	-7.46134	-7.4764	-6.83171
	201.5	-9.43608	-9.46079	-9.20709	-9.26253	-9.21504	-9.25562	-8.76671	-9.00427	-8.94481	-8.1374	-7.2687	-7.70631	-7.16368	-7.93467	-7.05297	-7.04617	-6.36143
	201	-9.34341	-9.411	-9.03845	-9.0667	-9.04743	-9.09958	-8.53739	-8.82333	-8.78226	-7.82677	-6.81383	-7.32433	-6.68722	-7.61935	-6.63088	-6.60021	-5.86876
	200.5	-9.22245	-9.30006	-8.81763	-8.8189	-8.87482	-8.89736	-8.25434	-8.6102	-8.5729	-7.51007	-6.3214	-6.90909	-6.19956	-7.2537	-6.19672	-6.14349	-5.34592
	200	-9.06861	-9.15435	-8.56873	-8.54003	-8.70363	-8.6667	-7.92903	-8.3758	-8.31486	-7.18146	-5.81386	-6.47199	-5.69923	-6.87758	-5.71985	-5.69773	-4.8254
	199.5	-8.89151	-8.96692	-8.32357	-8.24457	-8.525	-8.42481	-7.57853	-8.12679	-8.03955	-6.82624	-5.29013	-6.04049	-5.22239	-6.49196	-5.21413	-5.31011	-4.3358
	199	-8.68736	-8.71842	-8.0754	-7.93828	-8.32677	-8.15932	-7.19907	-7.82443	-7.74075	-6.44362	-4.73051	-5.5842	-4.75847	-6.06286	-4.72861	-4.94241	-3.85135
	198.5	-8.44772	-8.4021	-7.80527	-7.60533	-8.06567	-7.84997	-6.7973	-7.49916	-7.43459	-6.04845	-4.12111	-5.11024	-4.29604	-5.59048	-4.25006	-4.5579	-3.36184
	198	-8.17377	-8.03788	-7.53004	-7.27534	-7.75918	-7.53266	-6.40192	-7.16179	-7.12934	-5.65591	-3.52134	-4.62681	-3.84221	-5.13629	-3.77648	-4.15297	-2.897
	197.5	-7.88336	-7.63287	-7.25288	-6.95776	-7.43056	-7.20133	-6.05094	-6.7947	-6.82998	-5.26988	-2.93066	-4.14781	-3.40728	-4.71553	-3.34018	-3.74043	-2.43208
	197	-7.59464	-7.24172	-6.97674	-6.61195	-7.11051	-6.85332	-5.74444	-6.42375	-6.56778	-4.90412	-2.37458	-3.70654	-2.98384	-4.33426	-2.95079	-3.37941	-1.99579
	196.5	-7.30224	-6.87654	-6.69156	-6.27312	-6.8297	-6.50965	-5.47342	-6.05137	-6.31273	-4.56545	-1.87656	-3.30401	-2.58945	-4.00339	-2.5878	-3.07703	-1.56412
	196	-6.99027	-6.49534	-6.37063	-5.90647	-6.56239	-6.14393	-5.1939	-5.63945	-6.05814	-4.2027	-1.42761	-2.879	-2.2038	-3.68096	-2.18088	-2.80204	-1.09404
	195.5	-6.67685	-6.11362	-6.05025	-5.53923	-6.29413	-5.776	-4.91363	-5.22584	-5.80259	-3.83859	-0.97721	-2.45449	-1.82919	-3.35773	-1.77888	-2.53488	-0.640879
	195	-6.36337	-5.73047	-5.729	-5.17105	-6.02642	-5.40857	-4.63293	-4.81374	-5.54694	-3.47476	-0.527377	-2.04221	-1.45899	-3.03335	-1.3836	-2.28841	-0.211553
	194.5	-6.04896	-5.34783	-5.40744	-4.803	-5.75723	-5.04047	-4.35206	-4.39909	-5.28976	-3.11042	-0.091923	-1.63251	-1.09422	-2.7227	-0.995064	-2.05572	0.071271
	194	-5.73784	-4.96702	-5.08811	-4.43722	-5.49018	-4.67502	-4.07305	-3.98802	-5.0363	-2.74824	0.312396	-1.24183	-0.751756	-2.4261	-0.616779	-1.86225	0.304242
	193.5	-5.42822	-4.58964	-4.77103	-4.07301	-5.22668	-4.31212	-3.79706	-3.57964	-4.78405	-2.39295	0.711343	-0.855931	-0.424727	-2.13917	-0.268022	-1.71577	0.485548
	193	-5.12073	-4.21243	-4.45577	-3.71078	-4.96394	-3.95091	-3.52667	-3.17439	-4.53637	-2.05433	1.07589	-0.479248	-0.146944	-1.85729	0.02448	-1.58296	0.719225
	192.5	-4.81203	-3.83535	-4.13978	-3.35028	-4.70096	-3.59144	-3.25838	-2.78633	-4.29946	-1.73882	1.41326	-0.119593	0.101425	-1.60316	0.28808	-1.45128	0.916584
	192	-4.50466	-3.45932	-3.8238	-2.99031	-4.439	-3.2333	-2.9948	-2.4016	-4.0729	-1.45788	1.71932	0.205534	0.313576	-1.37785	0.520442	-1.32755	1.13925
	191.5	-4.20014	-3.08639	-3.51175	-2.63244	-4.17977	-2.87869	-2.7778	-2.02689	-3.86844	-1.21999	1.99532	0.484595	0.499844	-1.18401	0.69239	-1.24056	1.29026
	191	-3.89827	-2.7155	-3.20287	-2.28472	-3.92821	-2.52805	-2.59846	-1.65825	-3.68738	-1.0239	2.21808	0.701387	0.655069	-1.0472	0.806614	-1.18063	1.49297
	190.5	-3.6008	-2.34934	-2.91806	-1.94442	-3.70247	-2.18208	-2.44768	-1.3112	-3.51878	-0.864966	2.37694	0.888337	0.762375	-0.960057	0.886406	-1.17605	1.57159
	190	-3.31044	-1.9894	-2.669	-1.62352	-3.50452	-1.86062	-2.30728	-0.984296	-3.37293	-0.73423	2.47464	1.03283	0.827997	-0.902889	0.947239	-1.23485	1.71561

## Sheet: 2-(R,Z) Ellipticity
		4.02	10	15	19.99	24.97	29.97	34.97	39.98	45.01	50.04	54.99	60	64.98	70.01	74.99	79.99	84.96
	300	0.113887	-0.0114362	-0.121735	0.0541332	-0.0125534	0.0349787	0.194614	0.112363	0.228306	0.207023	0.193001	0.253428	0.426533	0.333316	0.309507	0.428048	0.288836
	299.5	0.113958	-0.0102266	-0.119523	0.0547467	-0.0113337	0.0357663	0.193951	0.112447	0.227336	0.206247	0.192352	0.25223	0.423761	0.331391	0.307798	0.425262	0.287316
	299	0.114028	-0.00901702	-0.117311	0.0553602	-0.0101139	0.0365539	0.193287	0.112531	0.226366	0.20547	0.191703	0.251031	0.420989	0.329466	0.30609	0.422477	0.285796
	298.5	0.114098	-0.00780748	-0.115098	0.0559737	-0.00889425	0.0373415	0.192623	0.112615	0.225396	0.204694	0.191054	0.249833	0.418217	0.327542	0.304382	0.419691	0.284276
	298	0.114168	-0.00659788	-0.112886	0.0565872	-0.00767452	0.0381292	0.19196	0.112699	0.224427	0.203918	0.190405	0.248635	0.415445	0.325617	0.302674	0.416905	0.282756
	297.5	0.114239	-0.00538834	-0.110674	0.0572007	-0.00645478	0.0389168	0.191296	0.112783	0.223457	0.203141	0.189756	0.247436	0.412673	0.323693	0.300966	0.414119	0.281235
	297	0.114309	-0.0041788	-0.108462	0.0578141	-0.00523505	0.0397043	0.190632	0.112868	0.222487	0.202365	0.189107	0.246238	0.409901	0.321768	0.299258	0.411334	0.279715
	296.5	0.114379	-0.00296919	-0.106249	0.0584276	-0.00401532	0.0404919	0.189969	0.112952	0.221517	0.201588	0.188458	0.24504	0.407129	0.319844	0.29755	0.408548	0.278195
	296	0.114449	-0.00175965	-0.104037	0.0590411	-0.00279564	0.0412796	0.189305	0.113036	0.220547	0.200812	0.187809	0.243842	0.404357	0.317919	0.295842	0.405762	0.276675
	295.5	0.11452	-0.000550113	-0.101825	0.0596546	-0.00157591	0.0420672	0.188642	0.11312	0.219577	0.200035	0.18716	0.242643	0.401585	0.315995	0.294134	0.402976	0.275155
	295	0.11459	0.000659488	-0.0996125	0.060268	-0.000356176	0.0428548	0.187978	0.113204	0.218607	0.199259	0.186511	0.241445	0.398813	0.31407	0.292426	0.400191	0.273635
	294.5	0.11466	0.00186903	-0.0974002	0.0608815	0.000863558	0.0436424	0.187314	0.113288	0.217637	0.198483	0.185862	0.240247	0.396041	0.312146	0.290718	0.397405	0.272114
	294	0.11473	0.00307863	-0.0951879	0.061495	0.00208329	0.04443	0.186651	0.113372	0.216667	0.197706	0.185213	0.239048	0.393269	0.310221	0.289009	0.394619	0.270594
	293.5	0.114801	0.00428817	-0.0929756	0.0621085	0.00330296	0.0452176	0.185987	0.113456	0.215697	0.19693	0.184564	0.23785	0.390498	0.308297	0.287301	0.391833	0.269074
	293	0.114871	0.00549771	-0.0907634	0.0627219	0.0045227	0.0460053	0.185323	0.11354	0.214727	0.196153	0.183915	0.236652	0.387726	0.306372	0.285593	0.389048	0.267554
	292.5	0.114941	0.00670731	-0.088551	0.0633354	0.00574243	0.0467929	0.18466	0.113625	0.213758	0.195377	0.183266	0.235454	0.384954	0.304447	0.283885	0.386262	0.266034
	292	0.115011	0.00791685	-0.0863388	0.0639489	0.00696216	0.0475805	0.183996	0.113709	0.212788	0.1946	0.182617	0.234255	0.382182	0.302523	0.282177	0.383476	0.264513
	291.5	0.115082	0.00912645	-0.0841265	0.0645624	0.00818184	0.0483681	0.183333	0.113793	0.211818	0.193824	0.181968	0.233057	0.37941	0.300598	0.280469	0.38069	0.262993
	291	0.115152	0.010336	-0.0819142	0.0651758	0.00940157	0.0491557	0.182669	0.113877	0.210848	0.193048	0.18132	0.231859	0.376638	0.298674	0.278761	0.377905	0.261473
	290.5	0.115222	0.0115455	-0.0797019	0.0657893	0.0106213	0.0499433	0.182005	0.113961	0.209878	0.192271	0.180671	0.23066	0.373866	0.296749	0.277053	0.375119	0.259953
	290	0.115293	0.0127551	-0.0774896	0.0664028	0.011841	0.0507309	0.181342	0.114045	0.208908	0.191495	0.180022	0.229462	0.371094	0.294825	0.275345	0.372333	0.258433
	289.5	0.115363	0.0139647	-0.0752774	0.0670163	0.0130608	0.0515185	0.180678	0.114129	0.207938	0.190718	0.179373	0.228264	0.368322	0.2929	0.273637	0.369547	0.256912
	289	0.115433	0.0151743	-0.0730651	0.0676298	0.0142804	0.0523061	0.180014	0.114213	0.206968	0.189942	0.178724	0.227065	0.36555	0.290976	0.271928	0.366762	0.255392
	288.5	0.115503	0.0163838	-0.0708528	0.0682433	0.0155002	0.0530937	0.179351	0.114298	0.205998	0.189165	0.178075	0.225867	0.362778	0.289051	0.27022	0.363976	0.253872
	288	0.115574	0.0175934	-0.0686405	0.0688568	0.0167199	0.0538814	0.178687	0.114382	0.205028	0.188389	0.177426	0.224669	0.360006	0.287127	0.268512	0.36119	0.252352
	287.5	0.115644	0.018803	-0.0664282	0.0694702	0.0179396	0.054669	0.178024	0.114466	0.204058	0.187613	0.176777	0.223471	0.357234	0.285202	0.266804	0.358404	0.250832
	287	0.115714	0.0200125	-0.064216	0.0700837	0.0191594	0.0554566	0.17736	0.11455	0.203089	0.186836	0.176128	0.222272	0.354462	0.283277	0.265096	0.355619	0.249312
	286.5	0.115784	0.021222	-0.0620037	0.0706972	0.0203791	0.0562442	0.176696	0.114634	0.202119	0.18606	0.175479	0.221074	0.35169	0.281353	0.263388	0.352833	0.247791
	286	0.115855	0.0224316	-0.0597914	0.0713107	0.0215988	0.0570318	0.176033	0.114718	0.201149	0.185283	0.17483	0.219876	0.348918	0.279428	0.26168	0.350047	0.246271
	285.5	0.115925	0.0236412	-0.0575791	0.0719241	0.0228185	0.0578194	0.175369	0.114802	0.200179	0.184507	0.174181	0.218677	0.346146	0.277504	0.259972	0.347261	0.244751
	285	0.115995	0.0248508	-0.0553668	0.0725376	0.0240383	0.058607	0.174706	0.114886	0.199209	0.18373	0.173532	0.217479	0.343374	0.275579	0.258264	0.344476	0.243231
	284.5	0.116065	0.0260603	-0.0531545	0.0731511	0.025258	0.0593946	0.174042	0.11497	0.198239	0.182954	0.172883	0.216281	0.340602	0.273655	0.256556	0.34169	0.241711
	284	0.116136	0.0272699	-0.0509422	0.0737646	0.0264777	0.0601822	0.173378	0.115055	0.197269	0.182178	0.172234	0.215083	0.33783	0.27173	0.254847	0.338904	0.24019
	283.5	0.116206	0.0284795	-0.0487299	0.074378	0.0276974	0.0609698	0.172715	0.115139	0.196299	0.181401	0.171585	0.213884	0.335058	0.269806	0.253139	0.336119	0.23867
	283	0.116276	0.029689	-0.0465177	0.0749915	0.0289171	0.0617574	0.172051	0.115223	0.195329	0.180625	0.170936	0.212686	0.332286	0.267881	0.251431	0.333333	0.23715
	282.5	0.116346	0.0308986	-0.0443054	0.075605	0.0301369	0.0625451	0.171387	0.115307	0.194359	0.179848	0.170287	0.211488	0.329514	0.265957	0.249723	0.330547	0.23563
	282	0.116417	0.0321081	-0.0420931	0.0762184	0.0313566	0.0633327	0.170724	0.115391	0.193389	0.179072	0.169638	0.210289	0.326742	0.264032	0.248015	0.327761	0.23411
	281.5	0.116487	0.0333177	-0.0398808	0.0768319	0.0325763	0.0641203	0.17006	0.115475	0.192419	0.178295	0.168989	0.209091	0.32397	0.262107	0.246307	0.324976	0.23259
	281	0.116557	0.0345273	-0.0376685	0.0774454	0.033796	0.0649079	0.169397	0.115559	0.19145	0.177519	0.16834	0.207893	0.321198	0.260183	0.244599	0.32219	0.231069
	280.5	0.116627	0.0357368	-0.0354563	0.0780589	0.0350157	0.0656955	0.168733	0.115643	0.19048	0.176743	0.167692	0.206695	0.318426	0.258258	0.242891	0.319404	0.229549
	280	0.116698	0.0369464	-0.0332439	0.0786724	0.0362355	0.0664832	0.168069	0.115728	0.18951	0.175966	0.167043	0.205496	0.315654	0.256334	0.241183	0.316618	0.228029
	279.5	0.116768	0.038156	-0.0310317	0.0792859	0.0374552	0.0672708	0.167406	0.115812	0.18854	0.17519	0.166394	0.204298	0.312882	0.254409	0.239475	0.313833	0.226509
	279	0.116838	0.0393655	-0.0288194	0.0798994	0.0386749	0.0680584	0.166742	0.115896	0.18757	0.174413	0.165745	0.2031	0.31011	0.252485	0.237767	0.311047	0.224989
	278.5	0.116908	0.0405751	-0.0266071	0.0805128	0.0398946	0.068846	0.166078	0.11598	0.1866	0.173637	0.165096	0.201901	0.307338	0.25056	0.236058	0.308261	0.223468
	278	0.116979	0.0417847	-0.0243948	0.0811263	0.0411143	0.0696336	0.165415	0.116064	0.18563	0.17286	0.164447	0.200703	0.304566	0.248636	0.23435	0.305475	0.221948
	277.5	0.117049	0.0429942	-0.0221825	0.0817398	0.0423341	0.0704212	0.164751	0.116148	0.18466	0.172084	0.163798	0.199505	0.301794	0.246711	0.232642	0.30269	0.220428
	277	0.117119	0.0442038	-0.0199703	0.0823533	0.0435537	0.0712088	0.164088	0.116232	0.18369	0.171308	0.163149	0.198307	0.299022	0.244787	0.230934	0.299904	0.218908
	276.5	0.11719	0.0454133	-0.017758	0.0829668	0.0447735	0.0719964	0.163424	0.116316	0.18272	0.170531	0.1625	0.197108	0.29625	0.242862	0.229226	0.297118	0.217388
	276	0.11726	0.0466229	-0.0155457	0.0835802	0.0459932	0.072784	0.16276	0.116401	0.18175	0.169755	0.161851	0.19591	0.293478	0.240938	0.227518	0.294332	0.215867
	275.5	0.11733	0.0478325	-0.0133334	0.0841937	0.0472129	0.0735716	0.162097	0.116485	0.180781	0.168978	0.161202	0.194712	0.290706	0.239013	0.22581	0.291547	0.214347
	275	0.1174	0.049042	-0.0111211	0.0848072	0.0484327	0.0743593	0.161433	0.116569	0.179811	0.168202	0.160553	0.193513	0.287934	0.237088	0.224102	0.288761	0.212827
	274.5	0.117471	0.0502516	-0.00890885	0.0854207	0.0496524	0.0751469	0.16077	0.116653	0.178841	0.167425	0.159904	0.192315	0.285162	0.235164	0.222394	0.285975	0.211307
	274	0.117541	0.0514612	-0.00669658	0.0860341	0.0508721	0.0759345	0.160106	0.116737	0.177871	0.166649	0.159255	0.191117	0.28239	0.233239	0.220686	0.283189	0.209787
	273.5	0.117611	0.0526708	-0.00448425	0.0866476	0.0520918	0.0767221	0.159442	0.116821	0.176901	0.165872	0.158606	0.189918	0.279619	0.231315	0.218977	0.280404	0.208267
	273	0.117681	0.0538803	-0.00227198	0.0872611	0.0533116	0.0775097	0.158779	0.116905	0.175931	0.165096	0.157957	0.18872	0.276847	0.22939	0.217269	0.277618	0.206746
	272.5	0.117752	0.0550898	-5.97127e-05	0.0878745	0.0545313	0.0782973	0.158115	0.116989	0.174961	0.16432	0.157308	0.187522	0.274075	0.227466	0.215561	0.274832	0.205226
	272	0.117822	0.0562994	0.00215256	0.088488	0.055751	0.0790849	0.157451	0.117073	0.173991	0.163543	0.156659	0.186324	0.271303	0.225541	0.213853	0.272046	0.203706
	271.5	0.117892	0.057509	0.00436489	0.0891015	0.0569707	0.0798725	0.156788	0.117158	0.173021	0.162767	0.15601	0.185125	0.268531	0.223617	0.212145	0.269261	0.202186
	271	0.117962	0.0587186	0.00657716	0.089715	0.0581904	0.0806601	0.156124	0.117242	0.172051	0.16199	0.155361	0.183927	0.265759	0.221692	0.210437	0.266475	0.200666
	270.5	0.118033	0.0599281	0.00878943	0.0903285	0.0594102	0.0814477	0.155461	0.117326	0.171081	0.161214	0.154712	0.182729	0.262987	0.219768	0.208729	0.263689	0.199145
	270	0.118103	0.0611377	0.0110017	0.090942	0.0606299	0.0822353	0.154797	0.11741	0.170111	0.160437	0.154064	0.18153	0.260215	0.217843	0.207021	0.260903	0.197625
	269.5	0.118173	0.0623473	0.013214	0.0915554	0.0618496	0.083023	0.154133	0.117494	0.169142	0.159661	0.153415	0.180332	0.257443	0.215918	0.205313	0.258118	0.196105
	269	0.118243	0.0635568	0.0154263	0.0921689	0.0630693	0.0838106	0.15347	0.117578	0.168172	0.158885	0.152766	0.179134	0.254671	0.213994	0.203605	0.255332	0.194585
	268.5	0.118314	0.0647663	0.0176386	0.0927824	0.064289	0.0845982	0.152806	0.117662	0.167202	0.158108	0.152117	0.177936	0.251899	0.212069	0.201896	0.252546	0.193065
	268	0.118384	0.0659759	0.0198508	0.0933959	0.0655088	0.0853858	0.152142	0.117746	0.166232	0.157332	0.151468	0.176737	0.249127	0.210145	0.200188	0.24976	0.191544
	267.5	0.118454	0.0671855	0.0220632	0.0940094	0.0667285	0.0861734	0.151479	0.117831	0.165262	0.156555	0.150819	0.175539	0.246355	0.20822	0.19848	0.246975	0.190024
	267	0.118524	0.0683951	0.0242754	0.0946229	0.0679482	0.086961	0.150815	0.117915	0.164292	0.155779	0.15017	0.174341	0.243583	0.206296	0.196772	0.244189	0.188504
	266.5	0.118595	0.0696046	0.0264877	0.0952363	0.0691679	0.0877486	0.150152	0.117999	0.163322	0.155002	0.149521	0.173142	0.240811	0.204371	0.195064	0.241403	0.186984
	266	0.118665	0.0708142	0.0287	0.0958498	0.0703876	0.0885362	0.149488	0.118083	0.162352	0.154226	0.148872	0.171944	0.238039	0.202447	0.193356	0.238617	0.185464
	265.5	0.118735	0.0720238	0.0309123	0.0964633	0.0716074	0.0893238	0.148824	0.118167	0.161382	0.15345	0.148223	0.170746	0.235267	0.200522	0.191648	0.235832	0.183944
	265	0.118805	0.0732333	0.0331246	0.0970767	0.0728271	0.0901114	0.148161	0.118251	0.160412	0.152673	0.147574	0.169548	0.232495	0.198598	0.18994	0.233046	0.182423
	264.5	0.118876	0.0744429	0.0353368	0.0976902	0.0740468	0.090899	0.147497	0.118335	0.159442	0.151897	0.146925	0.168349	0.229723	0.196673	0.188232	0.23026	0.180903
	264	0.118946	0.0756525	0.0375491	0.0983037	0.0752665	0.0916867	0.146833	0.118419	0.158473	0.15112	0.146276	0.167151	0.226951	0.194749	0.186524	0.227474	0.179383
	263.5	0.119016	0.076862	0.0397614	0.0989172	0.0764863	0.0924743	0.14617	0.118503	0.157503	0.150344	0.145627	0.165953	0.224179	0.192824	0.184815	0.224689	0.177863
	263	0.119087	0.0780716	0.0419737	0.0995306	0.077706	0.0932619	0.145506	0.118588	0.156533	0.149567	0.144978	0.164754	0.221407	0.190899	0.183107	0.221903	0.176343
	262.5	0.119157	0.0792811	0.044186	0.100144	0.0789257	0.0940495	0.144843	0.118672	0.155563	0.148791	0.144329	0.163556	0.218635	0.188975	0.181399	0.219117	0.174822
	262	0.119227	0.0804907	0.0463983	0.100758	0.0801454	0.0948371	0.144179	0.118756	0.154593	0.148015	0.14368	0.162358	0.215863	0.18705	0.179691	0.216331	0.173302
	261.5	0.119297	0.0817003	0.0486105	0.101371	0.0813651	0.0956248	0.143515	0.11884	0.153623	0.147238	0.143031	0.16116	0.213091	0.185126	0.177983	0.213546	0.171782
	261	0.119368	0.0829098	0.0508229	0.101985	0.0825849	0.0964124	0.142852	0.118924	0.152653	0.146462	0.142382	0.159961	0.210319	0.183201	0.176275	0.21076	0.170262
	260.5	0.119438	0.0841194	0.0530351	0.102598	0.0838046	0.0972	0.142188	0.119008	0.151683	0.145685	0.141733	0.158763	0.207547	0.181277	0.174567	0.207974	0.168742
	260	0.119508	0.085329	0.0552474	0.103212	0.0850243	0.0979876	0.141525	0.119092	0.150713	0.144909	0.141084	0.157565	0.204775	0.179352	0.172859	0.205188	0.167222
	259.5	0.119578	0.0865385	0.0574597	0.103825	0.086244	0.0987752	0.140861	0.119176	0.149743	0.144132	0.140436	0.156366	0.202003	0.177428	0.171151	0.202403	0.165701
	259	0.119649	0.0877481	0.059672	0.104438	0.0874637	0.0995628	0.140197	0.119261	0.148773	0.143356	0.139787	0.155168	0.199231	0.175503	0.169443	0.199617	0.164181
	258.5	0.119719	0.0889576	0.0618843	0.105052	0.0886835	0.10035	0.139534	0.119345	0.147804	0.14258	0.139138	0.15397	0.196459	0.173579	0.167735	0.196831	0.162661
	258	0.119789	0.0901672	0.0640965	0.105665	0.0899032	0.101138	0.13887	0.119429	0.146834	0.141803	0.138489	0.152771	0.193687	0.171654	0.166026	0.194045	0.161141
	257.5	0.119859	0.0913768	0.0663088	0.106279	0.0911229	0.101926	0.138206	0.119513	0.145864	0.141027	0.13784	0.151573	0.190915	0.169729	0.164318	0.19126	0.159621
	257	0.11993	0.0925863	0.0685211	0.106892	0.0923426	0.102713	0.137543	0.119597	0.144894	0.14025	0.137191	0.150375	0.188143	0.167805	0.16261	0.188474	0.1581
	256.5	0.12	0.0937959	0.0707334	0.107506	0.0935623	0.103501	0.136879	0.119681	0.143924	0.139474	0.136542	0.149177	0.185371	0.16588	0.160902	0.185688	0.15658
	256	0.12007	0.0950055	0.0729457	0.108119	0.0947821	0.104288	0.136216	0.119765	0.142954	0.138697	0.135893	0.147978	0.182599	0.163956	0.159194	0.182902	0.15506
	255.5	0.12014	0.0962151	0.0751579	0.108733	0.0960018	0.105076	0.135552	0.119849	0.141984	0.137921	0.135244	0.14678	0.179827	0.162031	0.157486	0.180117	0.15354
	255	0.120211	0.0974246	0.0773703	0.109346	0.0972215	0.105864	0.134888	0.119934	0.141014	0.137145	0.134595	0.145582	0.177055	0.160107	0.155778	0.177331	0.15202
	254.5	0.120281	0.0986342	0.0795825	0.10996	0.0984412	0.106651	0.134225	0.120018	0.140044	0.136368	0.133946	0.144383	0.174283	0.158182	0.15407	0.174545	0.150499
	254	0.120351	0.0998437	0.0817948	0.110573	0.0996609	0.107439	0.133561	0.120102	0.139074	0.135592	0.133297	0.143185	0.171511	0.156258	0.152362	0.171759	0.148979
	253.5	0.120421	0.101053	0.0840071	0.111187	0.100881	0.108227	0.132897	0.120186	0.138104	0.134815	0.132648	0.141987	0.168739	0.154333	0.150654	0.168974	0.147459
	253	0.120492	0.102263	0.0862194	0.1118	0.1021	0.109014	0.132234	0.12027	0.137135	0.134039	0.131999	0.140789	0.165968	0.152409	0.148945	0.166188	0.145939
	252.5	0.120562	0.103472	0.0884317	0.112414	0.10332	0.109802	0.13157	0.120354	0.136165	0.133262	0.13135	0.13959	0.163196	0.150484	0.147237	0.163402	0.144419
	252	0.120632	0.104682	0.0906439	0.113027	0.10454	0.110589	0.130907	0.120438	0.135195	0.132486	0.130701	0.138392	0.160424	0.148559	0.145529	0.160616	0.142899
	251.5	0.120702	0.105892	0.0928562	0.113641	0.10576	0.111377	0.130243	0.120522	0.134225	0.13171	0.130052	0.137194	0.157652	0.146635	0.143821	0.157831	0.141378
	251	0.120773	0.107101	0.0950685	0.114254	0.106979	0.112165	0.129579	0.120606	0.133255	0.130933	0.129403	0.135995	0.15488	0.14471	0.142113	0.155045	0.139858
	250.5	0.120843	0.108311	0.0972808	0.114868	0.108199	0.112952	0.128916	0.120691	0.132285	0.130157	0.128754	0.134797	0.152108	0.142786	0.140405	0.152259	0.138338
	250	0.120913	0.10952	0.0994931	0.115481	0.109419	0.11374	0.128252	0.120775	0.131315	0.12938	0.128105	0.133599	0.149336	0.140861	0.138697	0.149473	0.136818
	249.5	0.120984	0.11073	0.101705	0.116095	0.110638	0.114527	0.127588	0.120859	0.130345	0.128604	0.127456	0.132401	0.146564	0.138937	0.136989	0.146688	0.135298
	249	0.121054	0.111939	0.103918	0.116708	0.111858	0.115315	0.126925	0.120943	0.129375	0.127827	0.126808	0.131202	0.143792	0.137012	0.135281	0.143902	0.133777
	248.5	0.121124	0.113149	0.10613	0.117322	0.113078	0.116103	0.126261	0.121027	0.128405	0.127051	0.126159	0.130004	0.14102	0.135088	0.133573	0.141116	0.132257
	248	0.121194	0.114358	0.108342	0.117935	0.114298	0.11689	0.125598	0.121111	0.127435	0.126274	0.12551	0.128806	0.138248	0.133163	0.131864	0.13833	0.130737
	247.5	0.121265	0.115568	0.110554	0.118548	0.115517	0.117678	0.124934	0.121195	0.126465	0.125498	0.124861	0.127607	0.135476	0.131239	0.130156	0.135545	0.129217
	247	0.121335	0.116778	0.112767	0.119162	0.116737	0.118465	0.12427	0.121279	0.125496	0.124722	0.124212	0.126409	0.132704	0.129314	0.128448	0.132759	0.127697
	246.5	0.121405	0.117987	0.114979	0.119775	0.117957	0.119253	0.123607	0.121364	0.124526	0.123945	0.123563	0.125211	0.129932	0.12739	0.12674	0.129973	0.126176
	246	0.121475	0.119197	0.117191	0.120389	0.119176	0.120041	0.122943	0.121448	0.123556	0.123169	0.122914	0.124012	0.12716	0.125465	0.125032	0.127187	0.124656
	245.5	0.121546	0.120406	0.119404	0.121002	0.120396	0.120828	0.12228	0.121532	0.122586	0.122392	0.122265	0.122814	0.124388	0.12354	0.123324	0.124402	0.123136
	245	0.121616	0.121616	0.121616	0.121616	0.121616	0.121616	0.121616	0.121616	0.121616	0.121616	0.121616	0.121616	0.121616	0.121616	0.121616	0.121616	0.121616
	244.5	0.121686	0.122825	0.123828	0.122229	0.122836	0.122404	0.120952	0.1217	0.120646	0.120839	0.120967	0.120418	0.118844	0.119691	0.119908	0.11883	0.120096
	244	0.121756	0.124035	0.126041	0.122843	0.124055	0.123191	0.120289	0.121784	0.119676	0.120063	0.120318	0.119219	0.116072	0.117767	0.1182	0.116044	0.118576
	243.5	0.121827	0.125245	0.128253	0.123456	0.125275	0.123979	0.119625	0.121868	0.118706	0.119287	0.119669	0.118021	0.1133	0.115842	0.116492	0.113259	0.117055
	243	0.121897	0.126454	0.130465	0.12407	0.126495	0.124766	0.118961	0.121952	0.117736	0.11851	0.11902	0.116823	0.110528	0.113918	0.114784	0.110473	0.115535
	242.5	0.121967	0.127664	0.132677	0.124683	0.127715	0.125554	0.118298	0.122036	0.116766	0.117734	0.118371	0.115624	0.107756	0.111993	0.113075	0.107687	0.114015
	242	0.122037	0.128873	0.13489	0.125297	0.128934	0.126342	0.117634	0.122121	0.115796	0.116957	0.117722	0.114426	0.104984	0.110069	0.111367	0.104901	0.112495
	241.5	0.122108	0.130083	0.137102	0.12591	0.130154	0.127129	0.116971	0.122205	0.114827	0.116181	0.117073	0.113228	0.102212	0.108144	0.109659	0.102116	0.110975
	241	0.122178	0.131292	0.139314	0.126524	0.131374	0.127917	0.116307	0.122289	0.113857	0.115404	0.116424	0.11203	0.0994401	0.10622	0.107951	0.0993299	0.109454
	240.5	0.122248	0.132502	0.141527	0.127137	0.132593	0.128704	0.115643	0.122373	0.112887	0.114628	0.115775	0.110831	0.0966681	0.104295	0.106243	0.0965442	0.107934
	240	0.122318	0.133712	0.143739	0.127751	0.133813	0.129492	0.11498	0.122457	0.111917	0.113852	0.115126	0.109633	0.0938962	0.10237	0.104535	0.0937584	0.106414
	239.5	0.122389	0.134921	0.145951	0.128364	0.135033	0.13028	0.114316	0.122541	0.110947	0.113075	0.114477	0.108435	0.0911242	0.100446	0.102827	0.0909727	0.104894
	239	0.134681	0.149172	0.164376	0.140166	0.150236	0.141019	0.128987	0.12722	0.115905	0.124663	0.114541	0.11267	0.088232	0.098181	0.0992866	0.0820514	0.104585
	238.5	0.147959	0.165912	0.183373	0.153162	0.167751	0.152715	0.145948	0.133544	0.121344	0.137215	0.116296	0.118138	0.0854075	0.0974496	0.0960076	0.0749265	0.105906
	238	0.164582	0.183188	0.203271	0.168426	0.18641	0.164959	0.165812	0.142639	0.126721	0.151124	0.119697	0.125023	0.0831329	0.0998456	0.0925501	0.0692589	0.109431
	237.5	0.182777	0.201939	0.2245	0.184294	0.205521	0.179769	0.188163	0.155957	0.132139	0.167171	0.124705	0.133022	0.082395	0.105202	0.0905922	0.0661581	0.110875
	237	0.204264	0.22504	0.248563	0.20368	0.227217	0.19588	0.213261	0.17111	0.14015	0.186039	0.13184	0.143835	0.084253	0.114463	0.0911965	0.0674901	0.111134
	236.5	0.228595	0.251238	0.274032	0.226746	0.250187	0.213799	0.24093	0.185902	0.150464	0.205662	0.140453	0.156044	0.0886574	0.123377	0.0922896	0.0713616	0.112573
	236	0.256182	0.281362	0.299643	0.251747	0.276586	0.235175	0.271178	0.200827	0.16205	0.225226	0.150994	0.168562	0.0967212	0.132458	0.0939228	0.0785645	0.116133
	235.5	0.286359	0.315807	0.32509	0.278947	0.30627	0.258884	0.302388	0.217837	0.177382	0.245356	0.162558	0.180859	0.109117	0.142146	0.0970915	0.0896293	0.121619
	235	0.317769	0.352178	0.351025	0.307958	0.336974	0.283916	0.333506	0.235775	0.195497	0.265511	0.171739	0.191713	0.123389	0.152207	0.0995736	0.102272	0.126589
	234.5	0.352755	0.390095	0.378983	0.340406	0.372374	0.312172	0.367511	0.256416	0.219644	0.287042	0.179246	0.203842	0.139718	0.162953	0.102772	0.116918	0.133027
	234	0.393861	0.43012	0.411024	0.377557	0.412711	0.342927	0.404795	0.28123	0.249004	0.309543	0.187004	0.215951	0.159302	0.173296	0.107498	0.134721	0.140852
	233.5	0.438955	0.472677	0.44617	0.418552	0.458222	0.377864	0.443825	0.308658	0.281134	0.333318	0.196339	0.226829	0.181055	0.184076	0.11357	0.153838	0.148856
	233	0.488261	0.519335	0.485282	0.46139	0.507782	0.41666	0.484259	0.338688	0.316447	0.360399	0.20852	0.240114	0.20555	0.195136	0.119691	0.174635	0.157759
	232.5	0.540544	0.567172	0.526731	0.506529	0.558604	0.457809	0.524817	0.369916	0.351909	0.388573	0.221781	0.255916	0.230835	0.204724	0.125433	0.195944	0.167803
	232	0.595521	0.615906	0.568242	0.554718	0.607023	0.499196	0.564943	0.402417	0.385907	0.416936	0.234934	0.272648	0.253623	0.214171	0.132029	0.217356	0.177454
	231.5	0.651314	0.665285	0.609258	0.606044	0.652716	0.541763	0.603935	0.435222	0.418885	0.446168	0.245373	0.288497	0.274641	0.221377	0.139478	0.237777	0.183907
	231	0.709827	0.71764	0.651636	0.66003	0.697648	0.582343	0.640266	0.465285	0.453893	0.472536	0.253872	0.302517	0.295869	0.226323	0.147407	0.256671	0.188851
	230.5	0.771155	0.769715	0.693035	0.714128	0.740999	0.622645	0.67636	0.49474	0.48839	0.495365	0.259878	0.313646	0.314582	0.229603	0.153797	0.271242	0.193273
	230	0.833484	0.821996	0.731599	0.765546	0.782339	0.661335	0.709048	0.523999	0.522318	0.514461	0.26462	0.319866	0.330907	0.23052	0.157627	0.279635	0.194525
	229.5	0.894807	0.872666	0.768676	0.814543	0.820432	0.695727	0.736977	0.55333	0.55404	0.530157	0.267071	0.322479	0.342468	0.22899	0.159253	0.28222	0.190988
	229	0.951779	0.91889	0.804097	0.861369	0.853408	0.724385	0.75894	0.579043	0.584328	0.542186	0.266352	0.32097	0.34771	0.222664	0.157134	0.278789	0.181327
	228.5	1.00537	0.962795	0.838846	0.906614	0.883115	0.749252	0.776583	0.600413	0.613221	0.54752	0.264167	0.317153	0.348476	0.212696	0.152397	0.270788	0.166788
	228	1.05607	1.00386	0.870063	0.948509	0.906223	0.767857	0.788908	0.61746	0.635267	0.545418	0.260744	0.306964	0.343437	0.198067	0.143519	0.256369	0.145748
	227.5	1.09903	1.03901	0.895105	0.982975	0.919622	0.780604	0.794948	0.626013	0.649644	0.533843	0.254108	0.287611	0.329937	0.177827	0.12794	0.233815	0.118139
	227	1.13463	1.06668	0.914586	1.01135	0.925749	0.78543	0.793438	0.625025	0.65707	0.514739	0.241658	0.260538	0.307408	0.148713	0.105197	0.203945	0.0849654
	226.5	1.16024	1.08439	0.92757	1.03329	0.923438	0.78049	0.782463	0.613683	0.656461	0.486759	0.22225	0.224479	0.274384	0.111072	0.0736728	0.165099	0.0428734
	226	1.1749	1.0923	0.932509	1.04854	0.911652	0.767283	0.761855	0.593067	0.649066	0.44803	0.193817	0.177573	0.233707	0.065546	0.0337481	0.116627	-0.00904881
	225.5	1.17843	1.09131	0.930659	1.05314	0.888871	0.744421	0.732747	0.562124	0.632485	0.39984	0.154535	0.11943	0.185882	0.00928786	-0.0151732	0.0577846	-0.0721983
	225	1.17304	1.08042	0.922096	1.04801	0.859786	0.710205	0.693339	0.521317	0.606514	0.340498	0.104786	0.0494349	0.130248	-0.0556408	-0.074722	-0.0122444	-0.144593
	224.5	1.15566	1.05836	0.902854	1.02935	0.821957	0.667355	0.643325	0.473887	0.567522	0.272543	0.0465559	-0.030489	0.0643342	-0.129165	-0.144665	-0.0941166	-0.225064
	224	1.12838	1.02697	0.873483	1.00011	0.777134	0.614829	0.582593	0.419449	0.515195	0.196897	-0.0177969	-0.117373	-0.00910464	-0.210337	-0.223311	-0.186091	-0.315531
	223.5	1.08836	0.983777	0.833856	0.960958	0.721066	0.550873	0.508141	0.352189	0.44984	0.110502	-0.0917303	-0.213124	-0.0934096	-0.302141	-0.312909	-0.289	-0.417519
	223	1.03413	0.924842	0.782288	0.909835	0.652487	0.475396	0.421911	0.269929	0.371215	0.0126432	-0.175161	-0.317499	-0.189917	-0.405161	-0.414422	-0.402677	-0.531204
	222.5	0.965768	0.851561	0.717894	0.844724	0.569474	0.387292	0.327035	0.173436	0.278546	-0.0989077	-0.268847	-0.429718	-0.299179	-0.520352	-0.526051	-0.529273	-0.653821
	222	0.883571	0.762731	0.638318	0.761445	0.472956	0.285597	0.220559	0.0657919	0.165544	-0.223984	-0.3766	-0.551611	-0.420947	-0.645089	-0.650271	-0.669109	-0.787112
	221.5	0.783098	0.656335	0.542732	0.661206	0.360554	0.170713	0.101024	-0.0579717	0.0363511	-0.359736	-0.498573	-0.682934	-0.556968	-0.782082	-0.786846	-0.824082	-0.929422
	221	0.668038	0.536889	0.431788	0.545164	0.233247	0.0412947	-0.0340703	-0.197688	-0.110831	-0.50446	-0.63474	-0.822497	-0.70387	-0.929204	-0.933881	-0.989855	-1.07951
	220.5	0.53633	0.40657	0.300477	0.412461	0.0890514	-0.101296	-0.17917	-0.352043	-0.273504	-0.664332	-0.784867	-0.974663	-0.859906	-1.08379	-1.09273	-1.16832	-1.24168
	220	0.389046	0.262492	0.149382	0.25784	-0.0713378	-0.256797	-0.338027	-0.519925	-0.45275	-0.840904	-0.94839	-1.13853	-1.026	-1.24758	-1.26474	-1.3558	-1.41376
	219.5	0.225189	0.097293	-0.0200343	0.081102	-0.247034	-0.428496	-0.511634	-0.705148	-0.648072	-1.0323	-1.12988	-1.31449	-1.20331	-1.42315	-1.45289	-1.55607	-1.5983
	219	0.0420309	-0.0880303	-0.204618	-0.117688	-0.437533	-0.616867	-0.70345	-0.905963	-0.8628	-1.241	-1.324	-1.50231	-1.39373	-1.60859	-1.65537	-1.77116	-1.79199
	218.5	-0.159461	-0.293535	-0.407195	-0.336361	-0.647073	-0.819632	-0.910403	-1.12006	-1.09666	-1.46689	-1.53323	-1.69959	-1.59868	-1.80658	-1.87096	-2.00023	-1.99337
	218	-0.377291	-0.516778	-0.626431	-0.574024	-0.871664	-1.03622	-1.13142	-1.35334	-1.3439	-1.70859	-1.75731	-1.90841	-1.81662	-2.01867	-2.09697	-2.23811	-2.20376
	217.5	-0.613315	-0.758288	-0.862692	-0.829352	-1.11373	-1.26795	-1.36768	-1.60827	-1.60477	-1.96682	-1.9961	-2.1259	-2.05126	-2.24515	-2.33373	-2.48317	-2.42172
	217	-0.869591	-1.01905	-1.12117	-1.10256	-1.37109	-1.51402	-1.61882	-1.88386	-1.87938	-2.23816	-2.25005	-2.3535	-2.30033	-2.4871	-2.57962	-2.739	-2.64792
	216.5	-1.14055	-1.29953	-1.3997	-1.39129	-1.64408	-1.77665	-1.88271	-2.17191	-2.17136	-2.52338	-2.51853	-2.59138	-2.56046	-2.74064	-2.83429	-3.00495	-2.88169
	216	-1.42886	-1.5992	-1.6961	-1.69653	-1.93034	-2.05643	-2.16265	-2.47133	-2.47927	-2.81861	-2.80071	-2.84236	-2.83143	-3.00541	-3.09888	-3.27976	-3.12195
	215.5	-1.73341	-1.91717	-2.00708	-2.01429	-2.22425	-2.34976	-2.45809	-2.78242	-2.79709	-3.1203	-3.08956	-3.10563	-3.10994	-3.27933	-3.37029	-3.5589	-3.36564
	215	-2.05133	-2.24733	-2.3314	-2.34148	-2.5286	-2.65742	-2.76747	-3.10348	-3.12462	-3.42801	-3.3859	-3.37655	-3.39612	-3.56025	-3.6481	-3.84033	-3.61667
	214.5	-2.38155	-2.59021	-2.66925	-2.68058	-2.8437	-2.97644	-3.08874	-3.43125	-3.4605	-3.74696	-3.68957	-3.65484	-3.68873	-3.84657	-3.93111	-4.12265	-3.87537
	214	-2.72162	-2.94602	-3.01807	-3.02941	-3.16812	-3.30484	-3.41955	-3.76242	-3.80412	-4.07118	-3.99796	-3.93546	-3.98555	-4.13735	-4.21489	-4.40284	-4.13583
	213.5	-3.06947	-3.31144	-3.3747	-3.38545	-3.5008	-3.64168	-3.75964	-4.09833	-4.154	-4.396	-4.31065	-4.21747	-4.28867	-4.43214	-4.49511	-4.68509	-4.39942
	213	-3.42617	-3.68062	-3.73999	-3.74463	-3.83927	-3.9839	-4.10573	-4.43512	-4.50488	-4.72308	-4.6232	-4.50117	-4.59351	-4.72806	-4.7709	-4.96832	-4.66304
	212.5	-3.78431	-4.05012	-4.11327	-4.10476	-4.18261	-4.32745	-4.45064	-4.77051	-4.85292	-5.046	-4.93277	-4.78234	-4.89914	-5.02364	-5.04062	-5.24382	-4.92413
	212	-4.14332	-4.42086	-4.49105	-4.46617	-4.52465	-4.6726	-4.79605	-5.11045	-5.19243	-5.36485	-5.24093	-5.06364	-5.1995	-5.31773	-5.30682	-5.5118	-5.18548
	211.5	-4.50641	-4.79429	-4.87057	-4.82725	-4.8693	-5.01872	-5.14052	-5.44845	-5.5259	-5.67857	-5.54622	-5.34483	-5.49855	-5.60808	-5.57047	-5.77534	-5.44489
	211	-4.87325	-5.17261	-5.25181	-5.19011	-5.21541	-5.36723	-5.48129	-5.78123	-5.85509	-5.98615	-5.85025	-5.62613	-5.79324	-5.89461	-5.8307	-6.03525	-5.7029
	210.5	-5.23628	-5.54677	-5.6244	-5.54974	-5.55683	-5.71215	-5.81367	-6.10148	-6.1784	-6.28397	-6.15027	-5.90475	-6.07796	-6.1666	-6.08675	-6.28633	-5.95444
	210	-5.59167	-5.91088	-5.985	-5.90052	-5.88326	-6.04797	-6.13599	-6.40404	-6.48916	-6.55831	-6.43886	-6.17793	-6.35016	-6.42223	-6.3343	-6.52149	-6.19633
	209.5	-5.93869	-6.26056	-6.33502	-6.23482	-6.20249	-6.37071	-6.44704	-6.69622	-6.78051	-6.81839	-6.71299	-6.44296	-6.60875	-6.65871	-6.56842	-6.74156	-6.42605
	209	-6.27512	-6.5967	-6.67568	-6.55978	-6.51595	-6.68224	-6.74604	-6.96929	-7.05929	-7.07086	-6.9751	-6.69922	-6.8551	-6.87693	-6.7941	-6.94823	-6.64516
	208.5	-6.60411	-6.92356	-7.00679	-6.87499	-6.82018	-6.98371	-7.02848	-7.22888	-7.31895	-7.31639	-7.22492	-6.94701	-7.09324	-7.06587	-7.00384	-7.14742	-6.85955
	208	-6.92025	-7.2369	-7.32354	-7.17184	-7.11017	-7.27614	-7.29971	-7.47526	-7.5623	-7.54863	-7.45746	-7.18419	-7.32111	-7.21977	-7.20179	-7.33141	-7.06329
	207.5	-7.22193	-7.5358	-7.62516	-7.44242	-7.38495	-7.55828	-7.55384	-7.7085	-7.7839	-7.75462	-7.66592	-7.40888	-7.53248	-7.35297	-7.37535	-7.50765	-7.2573
	207	-7.50854	-7.81783	-7.91116	-7.69162	-7.64479	-7.82547	-7.79372	-7.9153	-7.98749	-7.94465	-7.85289	-7.61478	-7.72133	-7.45979	-7.52583	-7.66088	-7.42121
	206.5	-7.77509	-8.08103	-8.1762	-7.91636	-7.87714	-8.07624	-8.0127	-8.09998	-8.17066	-8.1108	-8.01787	-7.78979	-7.86128	-7.5341	-7.65731	-7.79277	-7.54801
	206	-8.02306	-8.32148	-8.41331	-8.12066	-8.0817	-8.30354	-8.20963	-8.26005	-8.3255	-8.24981	-8.15648	-7.93213	-7.96872	-7.56374	-7.76097	-7.90622	-7.65441
	205.5	-8.25566	-8.5382	-8.62629	-8.30063	-8.26952	-8.49988	-8.38003	-8.37154	-8.44302	-8.34532	-8.26457	-8.03252	-8.03035	-7.57027	-7.84456	-7.99335	-7.70408
	205	-8.46992	-8.72747	-8.82025	-8.46137	-8.43279	-8.6716	-8.51888	-8.45259	-8.5348	-8.38877	-8.33385	-8.10038	-8.04185	-7.54275	-7.88474	-8.05281	-7.71523
	204.5	-8.6635	-8.89401	-8.98405	-8.59992	-8.56803	-8.82094	-8.60678	-8.49049	-8.60679	-8.40771	-8.36309	-8.13787	-8.01925	-7.4558	-7.88441	-8.06749	-7.71222
	204	-8.83613	-9.03504	-9.10856	-8.69155	-8.6551	-8.91911	-8.64214	-8.47683	-8.64741	-8.3846	-8.35468	-8.14188	-7.95559	-7.3286	-7.85813	-8.06566	-7.6859
	203.5	-8.98526	-9.14976	-9.20399	-8.7466	-8.69534	-8.95512	-8.63821	-8.44122	-8.63365	-8.32285	-8.29558	-8.12359	-7.84134	-7.16609	-7.81211	-8.03994	-7.60771
	203	-9.10437	-9.23837	-9.27282	-8.76209	-8.67529	-8.94167	-8.59647	-8.37525	-8.59431	-8.21795	-8.20673	-8.05948	-7.70065	-6.98583	-7.73157	-7.96291	-7.48049
	202.5	-9.18183	-9.2994	-9.31684	-8.72818	-8.57696	-8.89402	-8.50152	-8.286	-8.5333	-8.06817	-8.08262	-7.93756	-7.50863	-6.78519	-7.6268	-7.84879	-7.30265
	202	-9.20684	-9.33337	-9.32405	-8.63594	-8.4229	-8.81471	-8.34042	-8.16675	-8.43807	-7.88956	-7.93427	-7.77594	-7.24277	-6.54385	-7.50922	-7.71035	-7.09511
	201.5	-9.19306	-9.3319	-9.30904	-8.49191	-8.22958	-8.67956	-8.11877	-8.01695	-8.29269	-7.69637	-7.74047	-7.57628	-6.90524	-6.28557	-7.38151	-7.56736	-6.85864
	201	-9.14629	-9.30258	-9.27585	-8.3065	-8.01568	-8.50032	-7.8584	-7.81411	-8.12177	-7.49594	-7.51494	-7.36579	-6.51557	-5.99265	-7.24492	-7.41904	-6.57251
	200.5	-9.0545	-9.23867	-9.19319	-8.07091	-7.75275	-8.2558	-7.56123	-7.57589	-7.91797	-7.26629	-7.22586	-7.13341	-6.11024	-5.66465	-7.08139	-7.22515	-6.25068
	200	-8.93781	-9.13029	-9.0707	-7.82455	-7.46782	-7.97058	-7.22459	-7.33409	-7.6609	-6.99653	-6.90909	-6.85196	-5.69196	-5.3151	-6.90431	-7.00621	-5.92165
	199.5	-8.81272	-8.99341	-8.92077	-7.56457	-7.16811	-7.65238	-6.84324	-7.07563	-7.36453	-6.6995	-6.59023	-6.53371	-5.28553	-4.96957	-6.73159	-6.75821	-5.56651
	199	-8.66118	-8.8109	-8.75097	-7.26417	-6.82357	-7.31776	-6.40892	-6.80373	-7.04394	-6.38426	-6.24397	-6.1853	-4.85048	-4.61812	-6.55674	-6.48236	-5.20919
	198.5	-8.47791	-8.56737	-8.5563	-6.92406	-6.40755	-6.95556	-5.94284	-6.4946	-6.68076	-6.04346	-5.8679	-5.8216	-4.39398	-4.25389	-6.35625	-6.15143	-4.82348
	198	-8.24717	-8.26552	-8.35329	-6.57441	-5.97664	-6.5721	-5.47278	-6.16447	-6.31622	-5.69332	-5.49226	-5.46315	-3.90052	-3.88141	-6.14783	-5.82578	-4.4034
	197.5	-7.9995	-7.95658	-8.14854	-6.24714	-5.58337	-6.21135	-5.00003	-5.85925	-5.96515	-5.37358	-5.10809	-5.11659	-3.38999	-3.51412	-5.91177	-5.48924	-3.9988
	197	-7.73998	-7.67845	-7.95977	-5.93828	-5.25133	-5.89251	-4.54054	-5.55541	-5.64447	-5.10265	-4.76065	-4.77146	-2.90561	-3.17964	-5.6757	-5.17337	-3.65718
	196.5	-7.47245	-7.42661	-7.78688	-5.6206	-4.96648	-5.60569	-4.09904	-5.27804	-5.34299	-4.8551	-4.43901	-4.43433	-2.43583	-2.85607	-5.44962	-4.89081	-3.35389
	196	-7.17933	-7.1468	-7.58614	-5.26883	-4.71582	-5.30099	-3.65566	-4.9808	-5.01898	-4.60549	-4.09295	-4.10323	-1.9449	-2.53002	-5.2027	-4.60439	-3.06985
	195.5	-6.88654	-6.87332	-7.38352	-4.92119	-4.46708	-4.99512	-3.21602	-4.68356	-4.69849	-4.35719	-3.7523	-3.77167	-1.45685	-2.23085	-4.95595	-4.31999	-2.78539
	195	-6.59635	-6.60288	-7.1805	-4.5819	-4.22023	-4.68946	-2.78174	-4.38694	-4.38411	-4.12069	-3.42436	-3.44326	-0.975562	-1.94201	-4.72115	-4.03404	-2.50216
	194.5	-6.30821	-6.33159	-6.97684	-4.24606	-3.97386	-4.38466	-2.34747	-4.10106	-4.07164	-3.88596	-3.10194	-3.12281	-0.503227	-1.66703	-4.49405	-3.75885	-2.23672
	194	-6.02265	-6.06122	-6.78002	-3.917	-3.73943	-4.08146	-1.91665	-3.82258	-3.76066	-3.65861	-2.78767	-2.8202	-0.0657384	-1.41186	-4.27224	-3.48993	-1.99825
	193.5	-5.73896	-5.79574	-6.59464	-3.59124	-3.51258	-3.78614	-1.49133	-3.55345	-3.45975	-3.43853	-2.48268	-2.53742	0.354831	-1.18644	-4.06497	-3.22355	-1.7709
	193	-5.45597	-5.53692	-6.41687	-3.27088	-3.28547	-3.50787	-1.07862	-3.31363	-3.18135	-3.24376	-2.18979	-2.28174	0.745855	-0.970093	-3.86611	-2.96993	-1.5896
	192.5	-5.17427	-5.28806	-6.23971	-2.951	-3.0634	-3.23716	-0.679107	-3.08288	-2.91423	-3.08186	-1.91916	-2.04598	1.10602	-0.772435	-3.69721	-2.73014	-1.43611
	192	-4.89298	-5.04155	-6.07033	-2.63405	-2.8515	-2.97141	-0.311602	-2.87467	-2.65086	-2.9283	-1.67142	-1.82756	1.45059	-0.618033	-3.55761	-2.51934	-1.28477
	191.5	-4.61594	-4.79846	-5.92027	-2.3475	-2.6685	-2.73711	0.0200763	-2.70223	-2.4013	-2.8009	-1.44414	-1.62977	1.76901	-0.488792	-3.43203	-2.31103	-1.14409
	191	-4.34291	-4.56113	-5.78204	-2.08083	-2.51649	-2.54514	0.331902	-2.53606	-2.18923	-2.698	-1.25294	-1.43945	2.05084	-0.380325	-3.31359	-2.11408	-1.04417
	190.5	-4.0819	-4.32929	-5.653	-1.83845	-2.41124	-2.38381	0.625527	-2.38394	-1.98801	-2.62622	-1.08238	-1.27831	2.31887	-0.275643	-3.21865	-1.95888	-0.983893
	190	-3.84412	-4.10738	-5.53108	-1.6304	-2.36543	-2.23705	0.884608	-2.23864	-1.79403	-2.58589	-0.935619	-1.16065	2.54978	-0.177798	-3.13607	-1.83294	-0.960297

## Sheet: 2-(S,Z) Ellipticity
		5.04	9.99	15	20	25	30	35.03	39.97	45.02	50.01	55.01	60.02	64.95	70.01	74.98	79.98	85.01
	300	0.338065	0.22583	0.292928	0.325914	0.278194	0.263669	0.243094	0.227246	0.134836	0.152637	0.119069	0.0415113	0.027268	0.0441286	-0.0274405	-0.0354189	-0.00509079
	299.5	0.335591	0.228471	0.292991	0.326045	0.27947	0.265805	0.243489	0.226316	0.137921	0.151758	0.119191	0.0424297	0.0272273	0.0430089	-0.0301053	-0.0355686	-0.0057455
	299	0.336805	0.229806	0.294247	0.326594	0.2804	0.266197	0.243347	0.22596	0.138037	0.151789	0.118963	0.0421736	0.0279348	0.0428955	-0.0310821	-0.0352931	-0.00710623
	298.5	0.338019	0.231142	0.295503	0.327143	0.281331	0.266588	0.243206	0.225604	0.138153	0.151819	0.118734	0.0419176	0.0286424	0.0427821	-0.0320588	-0.0350176	-0.00846697
	298	0.339233	0.232477	0.296759	0.327692	0.282261	0.266979	0.243064	0.225248	0.138269	0.151849	0.118506	0.0416615	0.02935	0.0426687	-0.0330355	-0.0347421	-0.0098277
	297.5	0.340446	0.233812	0.298015	0.328241	0.283192	0.26737	0.242922	0.224891	0.138385	0.151879	0.118277	0.0414055	0.0300575	0.0425553	-0.0340123	-0.0344666	-0.0111884
	297	0.34166	0.235147	0.299271	0.32879	0.284122	0.267761	0.242781	0.224535	0.138501	0.151909	0.118049	0.0411495	0.0307651	0.0424419	-0.034989	-0.0341911	-0.0125492
	296.5	0.342874	0.236483	0.300527	0.329339	0.285053	0.268153	0.242639	0.224179	0.138617	0.15194	0.11782	0.0408934	0.0314727	0.0423284	-0.0359658	-0.0339156	-0.0139099
	296	0.344088	0.237818	0.301783	0.329888	0.285984	0.268544	0.242497	0.223822	0.138732	0.15197	0.117592	0.0406374	0.0321802	0.042215	-0.0369425	-0.0336401	-0.0152706
	295.5	0.345302	0.239153	0.303039	0.330437	0.286914	0.268935	0.242356	0.223466	0.138848	0.152	0.117363	0.0403813	0.0328878	0.0421016	-0.0379192	-0.0333646	-0.0166314
	295	0.346515	0.240489	0.304294	0.330986	0.287845	0.269326	0.242214	0.22311	0.138964	0.15203	0.117135	0.0401253	0.0335954	0.0419882	-0.038896	-0.0330891	-0.0179921
	294.5	0.347729	0.241824	0.30555	0.331535	0.288775	0.269718	0.242072	0.222753	0.13908	0.152061	0.116906	0.0398692	0.0343029	0.0418748	-0.0398727	-0.0328136	-0.0193528
	294	0.348943	0.243159	0.306806	0.332084	0.289706	0.270109	0.241931	0.222397	0.139196	0.152091	0.116678	0.0396132	0.0350105	0.0417614	-0.0408494	-0.0325381	-0.0207136
	293.5	0.350157	0.244494	0.308062	0.332633	0.290636	0.2705	0.241789	0.222041	0.139312	0.152121	0.116449	0.0393572	0.0357181	0.041648	-0.0418262	-0.0322626	-0.0220743
	293	0.351371	0.24583	0.309318	0.333182	0.291567	0.270891	0.241647	0.221685	0.139428	0.152151	0.116221	0.0391011	0.0364256	0.0415345	-0.0428029	-0.0319871	-0.023435
	292.5	0.352585	0.247165	0.310574	0.333731	0.292498	0.271282	0.241506	0.221328	0.139544	0.152181	0.115992	0.0388451	0.0371332	0.0414211	-0.0437797	-0.0317116	-0.0247958
	292	0.353798	0.2485	0.31183	0.33428	0.293428	0.271674	0.241364	0.220972	0.13966	0.152212	0.115764	0.038589	0.0378408	0.0413077	-0.0447564	-0.0314361	-0.0261565
	291.5	0.355012	0.249835	0.313086	0.334829	0.294359	0.272065	0.241222	0.220616	0.139776	0.152242	0.115535	0.038333	0.0385483	0.0411943	-0.0457331	-0.0311606	-0.0275172
	291	0.356226	0.251171	0.314342	0.335378	0.295289	0.272456	0.241081	0.220259	0.139892	0.152272	0.115307	0.0380769	0.0392559	0.0410809	-0.0467099	-0.0308851	-0.028878
	290.5	0.35744	0.252506	0.315598	0.335927	0.29622	0.272847	0.240939	0.219903	0.140008	0.152302	0.115078	0.0378209	0.0399635	0.0409675	-0.0476866	-0.0306096	-0.0302387
	290	0.358654	0.253841	0.316853	0.336476	0.29715	0.273239	0.240797	0.219547	0.140124	0.152332	0.11485	0.0375649	0.040671	0.040854	-0.0486633	-0.0303342	-0.0315994
	289.5	0.359867	0.255176	0.318109	0.337025	0.298081	0.27363	0.240656	0.21919	0.14024	0.152363	0.114621	0.0373088	0.0413786	0.0407406	-0.0496401	-0.0300587	-0.0329602
	289	0.361081	0.256512	0.319365	0.337574	0.299011	0.274021	0.240514	0.218834	0.140356	0.152393	0.114393	0.0370528	0.0420862	0.0406272	-0.0506168	-0.0297832	-0.0343209
	288.5	0.362295	0.257847	0.320621	0.338123	0.299942	0.274412	0.240372	0.218478	0.140472	0.152423	0.114164	0.0367967	0.0427937	0.0405138	-0.0515936	-0.0295077	-0.0356816
	288	0.363509	0.259182	0.321877	0.338672	0.300873	0.274803	0.240231	0.218121	0.140588	0.152453	0.113936	0.0365407	0.0435013	0.0404004	-0.0525703	-0.0292322	-0.0370424
	287.5	0.364723	0.260517	0.323133	0.339221	0.301803	0.275195	0.240089	0.217765	0.140704	0.152483	0.113707	0.0362846	0.0442089	0.040287	-0.053547	-0.0289567	-0.0384031
	287	0.365937	0.261853	0.324389	0.33977	0.302734	0.275586	0.239947	0.217409	0.14082	0.152514	0.113479	0.0360286	0.0449164	0.0401735	-0.0545238	-0.0286812	-0.0397638
	286.5	0.36715	0.263188	0.325645	0.340319	0.303664	0.275977	0.239805	0.217053	0.140936	0.152544	0.11325	0.0357726	0.045624	0.0400601	-0.0555005	-0.0284057	-0.0411246
	286	0.368364	0.264523	0.326901	0.340868	0.304595	0.276368	0.239664	0.216696	0.141052	0.152574	0.113022	0.0355165	0.0463316	0.0399467	-0.0564772	-0.0281302	-0.0424853
	285.5	0.369578	0.265858	0.328156	0.341417	0.305525	0.276759	0.239522	0.21634	0.141168	0.152604	0.112793	0.0352605	0.0470391	0.0398333	-0.057454	-0.0278547	-0.043846
	285	0.370792	0.267194	0.329412	0.341966	0.306456	0.277151	0.23938	0.215984	0.141284	0.152635	0.112565	0.0350044	0.0477467	0.0397199	-0.0584307	-0.0275792	-0.0452068
	284.5	0.372006	0.268529	0.330668	0.342515	0.307387	0.277542	0.239239	0.215627	0.1414	0.152665	0.112336	0.0347484	0.0484543	0.0396065	-0.0594075	-0.0273037	-0.0465675
	284	0.373219	0.269864	0.331924	0.343064	0.308317	0.277933	0.239097	0.215271	0.141516	0.152695	0.112108	0.0344923	0.0491618	0.039493	-0.0603842	-0.0270282	-0.0479282
	283.5	0.374433	0.271199	0.33318	0.343613	0.309248	0.278324	0.238955	0.214915	0.141632	0.152725	0.111879	0.0342363	0.0498694	0.0393796	-0.0613609	-0.0267527	-0.049289
	283	0.375647	0.272535	0.334436	0.344162	0.310178	0.278716	0.238814	0.214558	0.141748	0.152755	0.111651	0.0339803	0.050577	0.0392662	-0.0623377	-0.0264772	-0.0506497
	282.5	0.376861	0.27387	0.335692	0.344711	0.311109	0.279107	0.238672	0.214202	0.141864	0.152786	0.111422	0.0337242	0.0512845	0.0391528	-0.0633144	-0.0262017	-0.0520104
	282	0.378075	0.275205	0.336948	0.34526	0.312039	0.279498	0.23853	0.213846	0.14198	0.152816	0.111194	0.0334682	0.0519921	0.0390394	-0.0642911	-0.0259262	-0.0533712
	281.5	0.379289	0.27654	0.338204	0.345809	0.31297	0.279889	0.238389	0.21349	0.142096	0.152846	0.110965	0.0332121	0.0526997	0.038926	-0.0652679	-0.0256507	-0.0547319
	281	0.380502	0.277876	0.339459	0.346357	0.313901	0.28028	0.238247	0.213133	0.142212	0.152876	0.110737	0.0329561	0.0534072	0.0388126	-0.0662446	-0.0253752	-0.0560926
	280.5	0.381716	0.279211	0.340715	0.346906	0.314831	0.280672	0.238105	0.212777	0.142328	0.152906	0.110508	0.0327	0.0541148	0.0386991	-0.0672214	-0.0250997	-0.0574534
	280	0.38293	0.280546	0.341971	0.347455	0.315762	0.281063	0.237964	0.212421	0.142444	0.152937	0.11028	0.032444	0.0548224	0.0385857	-0.0681981	-0.0248242	-0.0588141
	279.5	0.384144	0.281881	0.343227	0.348004	0.316692	0.281454	0.237822	0.212064	0.14256	0.152967	0.110051	0.032188	0.0555299	0.0384723	-0.0691748	-0.0245487	-0.0601748
	279	0.385358	0.283217	0.344483	0.348553	0.317623	0.281845	0.23768	0.211708	0.142676	0.152997	0.109823	0.0319319	0.0562375	0.0383589	-0.0701516	-0.0242733	-0.0615356
	278.5	0.386571	0.284552	0.345739	0.349102	0.318553	0.282237	0.237539	0.211352	0.142792	0.153027	0.109594	0.0316759	0.0569451	0.0382455	-0.0711283	-0.0239978	-0.0628963
	278	0.387785	0.285887	0.346995	0.349651	0.319484	0.282628	0.237397	0.210995	0.142908	0.153058	0.109366	0.0314198	0.0576526	0.0381321	-0.072105	-0.0237223	-0.064257
	277.5	0.388999	0.287222	0.348251	0.3502	0.320415	0.283019	0.237255	0.210639	0.143024	0.153088	0.109137	0.0311638	0.0583602	0.0380186	-0.0730818	-0.0234468	-0.0656178
	277	0.390213	0.288558	0.349507	0.350749	0.321345	0.28341	0.237114	0.210283	0.14314	0.153118	0.108909	0.0309077	0.0590678	0.0379052	-0.0740585	-0.0231713	-0.0669785
	276.5	0.391427	0.289893	0.350762	0.351298	0.322276	0.283801	0.236972	0.209927	0.143256	0.153148	0.10868	0.0306517	0.0597753	0.0377918	-0.0750353	-0.0228958	-0.0683392
	276	0.392641	0.291228	0.352018	0.351847	0.323206	0.284193	0.23683	0.20957	0.143372	0.153178	0.108452	0.0303957	0.0604829	0.0376784	-0.076012	-0.0226203	-0.0697
	275.5	0.393854	0.292563	0.353274	0.352396	0.324137	0.284584	0.236689	0.209214	0.143488	0.153209	0.108223	0.0301396	0.0611905	0.037565	-0.0769887	-0.0223448	-0.0710607
	275	0.395068	0.293899	0.35453	0.352945	0.325067	0.284975	0.236547	0.208858	0.143604	0.153239	0.107995	0.0298836	0.061898	0.0374516	-0.0779655	-0.0220693	-0.0724214
	274.5	0.396282	0.295234	0.355786	0.353494	0.325998	0.285366	0.236405	0.208501	0.14372	0.153269	0.107766	0.0296275	0.0626056	0.0373381	-0.0789422	-0.0217938	-0.0737822
	274	0.397496	0.296569	0.357042	0.354043	0.326929	0.285758	0.236264	0.208145	0.143836	0.153299	0.107538	0.0293715	0.0633132	0.0372247	-0.0799189	-0.0215183	-0.0751429
	273.5	0.39871	0.297905	0.358298	0.354592	0.327859	0.286149	0.236122	0.207789	0.143952	0.153329	0.107309	0.0291154	0.0640207	0.0371113	-0.0808957	-0.0212428	-0.0765036
	273	0.399923	0.29924	0.359554	0.355141	0.32879	0.28654	0.23598	0.207432	0.144068	0.15336	0.107081	0.0288594	0.0647283	0.0369979	-0.0818724	-0.0209673	-0.0778644
	272.5	0.401137	0.300575	0.36081	0.35569	0.32972	0.286931	0.235839	0.207076	0.144184	0.15339	0.106852	0.0286034	0.0654359	0.0368845	-0.0828492	-0.0206918	-0.0792251
	272	0.402351	0.30191	0.362066	0.356239	0.330651	0.287322	0.235697	0.20672	0.1443	0.15342	0.106624	0.0283473	0.0661434	0.0367711	-0.0838259	-0.0204163	-0.0805858
	271.5	0.403565	0.303246	0.363321	0.356788	0.331581	0.287714	0.235555	0.206364	0.144416	0.15345	0.106395	0.0280913	0.066851	0.0366576	-0.0848026	-0.0201408	-0.0819466
	271	0.404779	0.304581	0.364577	0.357337	0.332512	0.288105	0.235413	0.206007	0.144532	0.15348	0.106167	0.0278352	0.0675586	0.0365442	-0.0857794	-0.0198653	-0.0833073
	270.5	0.405993	0.305916	0.365833	0.357886	0.333443	0.288496	0.235272	0.205651	0.144648	0.153511	0.105938	0.0275792	0.0682661	0.0364308	-0.0867561	-0.0195898	-0.084668
	270	0.407206	0.307251	0.367089	0.358435	0.334373	0.288887	0.23513	0.205295	0.144763	0.153541	0.10571	0.0273231	0.0689737	0.0363174	-0.0877328	-0.0193143	-0.0860288
	269.5	0.40842	0.308587	0.368345	0.358984	0.335304	0.289279	0.234988	0.204938	0.144879	0.153571	0.105481	0.0270671	0.0696813	0.036204	-0.0887096	-0.0190388	-0.0873895
	269	0.409634	0.309922	0.369601	0.359533	0.336234	0.28967	0.234847	0.204582	0.144995	0.153601	0.105253	0.0268111	0.0703888	0.0360906	-0.0896863	-0.0187633	-0.0887502
	268.5	0.410848	0.311257	0.370857	0.360082	0.337165	0.290061	0.234705	0.204226	0.145111	0.153632	0.105024	0.026555	0.0710964	0.0359772	-0.0906631	-0.0184879	-0.090111
	268	0.412062	0.312592	0.372113	0.360631	0.338095	0.290452	0.234563	0.203869	0.145227	0.153662	0.104796	0.026299	0.071804	0.0358637	-0.0916398	-0.0182124	-0.0914717
	267.5	0.413275	0.313928	0.373369	0.36118	0.339026	0.290843	0.234422	0.203513	0.145343	0.153692	0.104567	0.0260429	0.0725115	0.0357503	-0.0926165	-0.0179369	-0.0928324
	267	0.414489	0.315263	0.374624	0.361729	0.339957	0.291235	0.23428	0.203157	0.145459	0.153722	0.104339	0.0257869	0.0732191	0.0356369	-0.0935933	-0.0176614	-0.0941932
	266.5	0.415703	0.316598	0.37588	0.362278	0.340887	0.291626	0.234138	0.202801	0.145575	0.153752	0.10411	0.0255308	0.0739267	0.0355235	-0.09457	-0.0173859	-0.0955539
	266	0.416917	0.317933	0.377136	0.362827	0.341818	0.292017	0.233997	0.202444	0.145691	0.153783	0.103882	0.0252748	0.0746342	0.0354101	-0.0955467	-0.0171104	-0.0969146
	265.5	0.418131	0.319269	0.378392	0.363376	0.342748	0.292408	0.233855	0.202088	0.145807	0.153813	0.103653	0.0250188	0.0753418	0.0352967	-0.0965235	-0.0168349	-0.0982754
	265	0.419345	0.320604	0.379648	0.363925	0.343679	0.2928	0.233713	0.201732	0.145923	0.153843	0.103425	0.0247627	0.0760494	0.0351832	-0.0975002	-0.0165594	-0.0996361
	264.5	0.420558	0.321939	0.380904	0.364474	0.344609	0.293191	0.233572	0.201375	0.146039	0.153873	0.103196	0.0245067	0.0767569	0.0350698	-0.098477	-0.0162839	-0.100997
	264	0.421772	0.323274	0.38216	0.365023	0.34554	0.293582	0.23343	0.201019	0.146155	0.153903	0.102968	0.0242506	0.0774645	0.0349564	-0.0994537	-0.0160084	-0.102358
	263.5	0.422986	0.32461	0.383416	0.365572	0.346471	0.293973	0.233288	0.200663	0.146271	0.153934	0.102739	0.0239946	0.0781721	0.034843	-0.10043	-0.0157329	-0.103718
	263	0.4242	0.325945	0.384672	0.366121	0.347401	0.294364	0.233147	0.200306	0.146387	0.153964	0.102511	0.0237385	0.0788796	0.0347296	-0.101407	-0.0154574	-0.105079
	262.5	0.425414	0.32728	0.385927	0.36667	0.348332	0.294756	0.233005	0.19995	0.146503	0.153994	0.102282	0.0234825	0.0795872	0.0346162	-0.102384	-0.0151819	-0.10644
	262	0.426627	0.328615	0.387183	0.367219	0.349262	0.295147	0.232863	0.199594	0.146619	0.154024	0.102054	0.0232265	0.0802948	0.0345027	-0.103361	-0.0149064	-0.1078
	261.5	0.427841	0.329951	0.388439	0.367768	0.350193	0.295538	0.232722	0.199238	0.146735	0.154054	0.101825	0.0229704	0.0810023	0.0343893	-0.104337	-0.0146309	-0.109161
	261	0.429055	0.331286	0.389695	0.368317	0.351123	0.295929	0.23258	0.198881	0.146851	0.154085	0.101597	0.0227144	0.0817099	0.0342759	-0.105314	-0.0143554	-0.110522
	260.5	0.430269	0.332621	0.390951	0.368866	0.352054	0.29632	0.232438	0.198525	0.146967	0.154115	0.101368	0.0224583	0.0824175	0.0341625	-0.106291	-0.0140799	-0.111883
	260	0.431483	0.333956	0.392207	0.369415	0.352985	0.296712	0.232297	0.198169	0.147083	0.154145	0.10114	0.0222023	0.083125	0.0340491	-0.107268	-0.0138044	-0.113243
	259.5	0.432696	0.335292	0.393463	0.369964	0.353915	0.297103	0.232155	0.197812	0.147199	0.154175	0.100911	0.0219462	0.0838326	0.0339357	-0.108244	-0.0135289	-0.114604
	259	0.43391	0.336627	0.394719	0.370513	0.354846	0.297494	0.232013	0.197456	0.147315	0.154206	0.100683	0.0216902	0.0845402	0.0338222	-0.109221	-0.0132534	-0.115965
	258.5	0.435124	0.337962	0.395975	0.371062	0.355776	0.297885	0.231872	0.1971	0.147431	0.154236	0.100454	0.0214342	0.0852477	0.0337088	-0.110198	-0.0129779	-0.117326
	258	0.436338	0.339297	0.397231	0.371611	0.356707	0.298277	0.23173	0.196743	0.147547	0.154266	0.100226	0.0211781	0.0859553	0.0335954	-0.111175	-0.0127025	-0.118686
	257.5	0.437552	0.340633	0.398486	0.37216	0.357637	0.298668	0.231588	0.196387	0.147663	0.154296	0.0999975	0.0209221	0.0866629	0.033482	-0.112151	-0.012427	-0.120047
	257	0.438766	0.341968	0.399742	0.372709	0.358568	0.299059	0.231447	0.196031	0.147779	0.154326	0.099769	0.020666	0.0873704	0.0333686	-0.113128	-0.0121515	-0.121408
	256.5	0.439979	0.343303	0.400998	0.373258	0.359499	0.29945	0.231305	0.195675	0.147895	0.154357	0.0995405	0.02041	0.088078	0.0332552	-0.114105	-0.011876	-0.122769
	256	0.441193	0.344638	0.402254	0.373807	0.360429	0.299841	0.231163	0.195318	0.148011	0.154387	0.099312	0.0201539	0.0887856	0.0331418	-0.115081	-0.0116005	-0.124129
	255.5	0.442407	0.345974	0.40351	0.374356	0.36136	0.300233	0.231021	0.194962	0.148127	0.154417	0.0990835	0.0198979	0.0894931	0.0330283	-0.116058	-0.011325	-0.12549
	255	0.443621	0.347309	0.404766	0.374905	0.36229	0.300624	0.23088	0.194606	0.148243	0.154447	0.098855	0.0196419	0.0902007	0.0329149	-0.117035	-0.0110495	-0.126851
	254.5	0.444835	0.348644	0.406022	0.375454	0.363221	0.301015	0.230738	0.194249	0.148359	0.154477	0.0986265	0.0193858	0.0909083	0.0328015	-0.118012	-0.010774	-0.128211
	254	0.446048	0.34998	0.407278	0.376003	0.364151	0.301406	0.230596	0.193893	0.148475	0.154508	0.098398	0.0191298	0.0916158	0.0326881	-0.118988	-0.0104985	-0.129572
	253.5	0.447262	0.351315	0.408534	0.376551	0.365082	0.301798	0.230455	0.193537	0.148591	0.154538	0.0981695	0.0188737	0.0923234	0.0325747	-0.119965	-0.010223	-0.130933
	253	0.448476	0.35265	0.409789	0.3771	0.366013	0.302189	0.230313	0.19318	0.148707	0.154568	0.097941	0.0186177	0.093031	0.0324613	-0.120942	-0.0099475	-0.132294
	252.5	0.44969	0.353985	0.411045	0.377649	0.366943	0.30258	0.230171	0.192824	0.148823	0.154598	0.0977125	0.0183616	0.0937385	0.0323478	-0.121919	-0.009672	-0.133654
	252	0.450904	0.355321	0.412301	0.378198	0.367874	0.302971	0.23003	0.192468	0.148939	0.154628	0.097484	0.0181056	0.0944461	0.0322344	-0.122895	-0.00939651	-0.135015
	251.5	0.452118	0.356656	0.413557	0.378747	0.368804	0.303362	0.229888	0.192112	0.149055	0.154659	0.0972555	0.0178496	0.0951537	0.032121	-0.123872	-0.00912101	-0.136376
	251	0.453331	0.357991	0.414813	0.379296	0.369735	0.303754	0.229746	0.191755	0.149171	0.154689	0.097027	0.0175935	0.0958612	0.0320076	-0.124849	-0.00884552	-0.137737
	250.5	0.454545	0.359326	0.416069	0.379845	0.370665	0.304145	0.229605	0.191399	0.149287	0.154719	0.0967985	0.0173375	0.0965688	0.0318942	-0.125826	-0.00857002	-0.139097
	250	0.455759	0.360662	0.417325	0.380394	0.371596	0.304536	0.229463	0.191043	0.149403	0.154749	0.0965701	0.0170814	0.0972764	0.0317808	-0.126802	-0.00829453	-0.140458
	249.5	0.456973	0.361997	0.418581	0.380943	0.372527	0.304927	0.229321	0.190686	0.149519	0.15478	0.0963416	0.0168254	0.0979839	0.0316673	-0.127779	-0.00801903	-0.141819
	249	0.458187	0.363332	0.419837	0.381492	0.373457	0.305319	0.22918	0.19033	0.149635	0.15481	0.0961131	0.0165693	0.0986915	0.0315539	-0.128756	-0.00774353	-0.14318
	248.5	0.4594	0.364667	0.421092	0.382041	0.374388	0.30571	0.229038	0.189974	0.149751	0.15484	0.0958846	0.0163133	0.0993991	0.0314405	-0.129733	-0.00746804	-0.14454
	248	0.460614	0.366003	0.422348	0.38259	0.375318	0.306101	0.228896	0.189617	0.149867	0.15487	0.0956561	0.0160573	0.100107	0.0313271	-0.130709	-0.00719254	-0.145901
	247.5	0.461828	0.367338	0.423604	0.383139	0.376249	0.306492	0.228755	0.189261	0.149983	0.1549	0.0954276	0.0158012	0.100814	0.0312137	-0.131686	-0.00691705	-0.147262
	247	0.463042	0.368673	0.42486	0.383688	0.377179	0.306883	0.228613	0.188905	0.150099	0.154931	0.0951991	0.0155452	0.101522	0.0311003	-0.132663	-0.00664155	-0.148622
	246.5	0.464256	0.370008	0.426116	0.384237	0.37811	0.307275	0.228471	0.188549	0.150215	0.154961	0.0949706	0.0152891	0.102229	0.0309868	-0.133639	-0.00636606	-0.149983
	246	0.46547	0.371344	0.427372	0.384786	0.379041	0.307666	0.22833	0.188192	0.150331	0.154991	0.0947421	0.0150331	0.102937	0.0308734	-0.134616	-0.00609056	-0.151344
	245.5	0.466683	0.372679	0.428628	0.385335	0.379971	0.308057	0.228188	0.187836	0.150447	0.155021	0.0945136	0.014777	0.103644	0.03076	-0.135593	-0.00581507	-0.152705
	245	0.467897	0.374014	0.429884	0.385884	0.380902	0.308448	0.228046	0.18748	0.150563	0.155051	0.0942851	0.014521	0.104352	0.0306466	-0.13657	-0.00553957	-0.154065
	244.5	0.469111	0.375349	0.43114	0.386433	0.381832	0.308839	0.227905	0.187123	0.150679	0.155082	0.0940566	0.014265	0.10506	0.0305332	-0.137546	-0.00526408	-0.155426
	244	0.470325	0.376685	0.432395	0.386982	0.382763	0.309231	0.227763	0.186767	0.150795	0.155112	0.0938281	0.0140089	0.105767	0.0304198	-0.138523	-0.00498858	-0.156787
	243.5	0.477195	0.377004	0.43913	0.394327	0.389225	0.315106	0.229923	0.190338	0.149432	0.157903	0.0969601	0.0112937	0.101162	0.0275032	-0.14095	-0.00439389	-0.166528
	243	0.483555	0.379838	0.445424	0.402618	0.394322	0.321206	0.233323	0.195067	0.148065	0.161515	0.0994303	0.00878702	0.0955792	0.0236748	-0.14253	-0.00364883	-0.175789
	242.5	0.492727	0.38719	0.452395	0.413504	0.398863	0.329226	0.239335	0.202725	0.147979	0.165074	0.103533	0.00770533	0.090977	0.0203106	-0.142056	-0.00224769	-0.184416
	242	0.504109	0.39823	0.461258	0.426273	0.404852	0.339217	0.247637	0.213516	0.151057	0.169288	0.110411	0.00893544	0.0875184	0.0179573	-0.140763	0.000529387	-0.192871
	241.5	0.519232	0.413306	0.473491	0.440808	0.414612	0.351553	0.258853	0.228272	0.157523	0.176106	0.119254	0.0121867	0.0858034	0.0176537	-0.137606	0.00400157	-0.199737
	241	0.536565	0.43171	0.489033	0.458172	0.425955	0.365571	0.271527	0.244408	0.166664	0.184378	0.130247	0.0178011	0.084564	0.018228	-0.133621	0.0064159	-0.204605
	240.5	0.555385	0.454255	0.507025	0.477382	0.441173	0.383757	0.287255	0.261474	0.176999	0.195287	0.141847	0.0251485	0.0838495	0.0189744	-0.129585	0.00825099	-0.207173
	240	0.577306	0.481238	0.530131	0.499712	0.461154	0.407145	0.307032	0.282581	0.189051	0.209212	0.154145	0.0349694	0.0855199	0.0194175	-0.126328	0.0109928	-0.208572
	239.5	0.600884	0.512578	0.556874	0.525844	0.484257	0.435093	0.33132	0.309261	0.203512	0.2259	0.168124	0.0467325	0.0915477	0.0214068	-0.12135	0.0151897	-0.209337
	239	0.626647	0.547372	0.587042	0.555117	0.511793	0.467231	0.360883	0.340066	0.221852	0.245671	0.184087	0.0607952	0.100674	0.0251369	-0.113227	0.0214744	-0.208843
	238.5	0.655047	0.587002	0.619273	0.586011	0.543328	0.504244	0.394169	0.372872	0.242917	0.267462	0.201878	0.0770802	0.110586	0.0295198	-0.102262	0.027565	-0.207087
	238	0.687489	0.630435	0.65244	0.621296	0.58013	0.543793	0.431606	0.40887	0.267231	0.290417	0.221117	0.0932516	0.121103	0.0337015	-0.0891949	0.0339605	-0.202964
	237.5	0.724525	0.678917	0.686626	0.661437	0.620141	0.585981	0.473146	0.447727	0.293369	0.314588	0.240814	0.113084	0.133142	0.0387396	-0.0750888	0.0410132	-0.196365
	237	0.767419	0.733193	0.727182	0.705725	0.662886	0.632688	0.520068	0.489612	0.322805	0.34116	0.263073	0.137175	0.149782	0.0485788	-0.0576176	0.0497988	-0.186758
	236.5	0.815127	0.791686	0.771889	0.752859	0.710273	0.683628	0.568254	0.531852	0.356405	0.367873	0.288162	0.163183	0.170873	0.0614613	-0.0388491	0.0586607	-0.175129
	236	0.866054	0.854098	0.820791	0.801131	0.764681	0.737278	0.617392	0.576748	0.39373	0.395054	0.315264	0.191569	0.195729	0.0764263	-0.0195444	0.0680709	-0.162159
	235.5	0.92106	0.920087	0.874934	0.85189	0.825527	0.793055	0.667357	0.623699	0.431571	0.424523	0.344324	0.222455	0.223286	0.0931905	-0.00033198	0.0772521	-0.144764
	235	0.979464	0.989304	0.931945	0.904929	0.887647	0.849979	0.717949	0.673204	0.469633	0.455089	0.374362	0.254621	0.250697	0.110731	0.018487	0.0858485	-0.123825
	234.5	1.04509	1.0635	0.994195	0.961463	0.954302	0.908849	0.772463	0.72619	0.509283	0.488708	0.406452	0.290258	0.279336	0.131101	0.0406515	0.0957207	-0.0986888
	234	1.11688	1.14225	1.06248	1.02404	1.02436	0.971189	0.832299	0.785113	0.553934	0.525758	0.442311	0.32706	0.307462	0.154597	0.0671706	0.109535	-0.0702908
	233.5	1.19126	1.22506	1.13456	1.09082	1.09396	1.03507	0.897763	0.84649	0.604958	0.564778	0.479716	0.363279	0.336479	0.182017	0.0951094	0.125072	-0.0393256
	233	1.27101	1.31227	1.21151	1.16071	1.1662	1.10155	0.968285	0.910263	0.660675	0.606706	0.517547	0.398981	0.365614	0.212569	0.126235	0.142292	-0.00756357
	232.5	1.3546	1.4044	1.29152	1.23308	1.24034	1.16911	1.04254	0.975765	0.718922	0.649136	0.555641	0.433224	0.395711	0.243255	0.157718	0.160495	0.0237527
	232	1.44294	1.49813	1.37259	1.30735	1.31476	1.23601	1.11856	1.04269	0.777184	0.689901	0.59462	0.466676	0.426301	0.271693	0.18721	0.17857	0.0545327
	231.5	1.53678	1.59451	1.4567	1.38289	1.388	1.30113	1.19459	1.10939	0.833039	0.72991	0.63502	0.502494	0.458437	0.30004	0.214898	0.195812	0.0851793
	231	1.63123	1.69184	1.54249	1.45683	1.46038	1.36512	1.2689	1.17295	0.886857	0.766589	0.673487	0.538149	0.48935	0.326537	0.242087	0.20972	0.114485
	230.5	1.72522	1.78841	1.62721	1.5298	1.53413	1.42617	1.3412	1.23421	0.938068	0.800749	0.709117	0.572004	0.514223	0.350116	0.265202	0.219721	0.13909
	230	1.81561	1.88007	1.70981	1.60185	1.60784	1.48213	1.40863	1.29278	0.985855	0.832342	0.738088	0.602849	0.531177	0.368687	0.28217	0.223158	0.158825
	229.5	1.89956	1.96569	1.78751	1.67113	1.67843	1.53169	1.47015	1.34293	1.02788	0.862354	0.758024	0.628691	0.540517	0.381288	0.290878	0.219667	0.174589
	229	1.97551	2.04409	1.85858	1.73426	1.74272	1.57462	1.52558	1.38449	1.06259	0.888126	0.76948	0.648035	0.540324	0.388067	0.291484	0.209644	0.182184
	228.5	2.04297	2.1123	1.92318	1.79014	1.80445	1.61384	1.57396	1.41949	1.08881	0.91105	0.773288	0.660455	0.533057	0.388485	0.286333	0.195733	0.183269
	228	2.10082	2.1694	1.97932	1.83822	1.85828	1.64436	1.61201	1.44333	1.10836	0.927481	0.768753	0.662884	0.517425	0.380225	0.273697	0.179207	0.173633
	227.5	2.14803	2.21061	2.02094	1.87622	1.90134	1.66479	1.63958	1.45335	1.11788	0.934216	0.753993	0.655431	0.490548	0.363385	0.248645	0.155463	0.151802
	227	2.18602	2.23836	2.05068	1.90254	1.9342	1.67331	1.65266	1.44955	1.10897	0.930713	0.727339	0.63914	0.451429	0.336481	0.209942	0.121453	0.119066
	226.5	2.21038	2.25191	2.06595	1.91594	1.95399	1.66965	1.64673	1.43125	1.0839	0.915942	0.690563	0.610617	0.400498	0.300314	0.161309	0.076795	0.0735634
	226	2.22053	2.2485	2.06744	1.9168	1.9594	1.65256	1.62358	1.39622	1.04248	0.887894	0.641822	0.569401	0.335809	0.254083	0.0999281	0.0217063	0.0158803
	225.5	2.21266	2.22863	2.05616	1.90263	1.94852	1.62202	1.58281	1.34621	0.983923	0.844578	0.57592	0.515901	0.257511	0.194454	0.0260261	-0.0467733	-0.0575484
	225	2.18114	2.19475	2.02957	1.8749	1.92349	1.57517	1.5245	1.27543	0.914583	0.786873	0.49479	0.447007	0.166719	0.119402	-0.060803	-0.132423	-0.146586
	224.5	2.12822	2.14425	1.98414	1.83326	1.88099	1.51099	1.44592	1.18681	0.834423	0.716141	0.40085	0.360457	0.0623265	0.0298773	-0.165262	-0.231284	-0.250374
	224	2.05604	2.07298	1.92246	1.77665	1.8187	1.42893	1.34712	1.08354	0.741205	0.633087	0.294911	0.256955	-0.056487	-0.0725334	-0.288106	-0.343563	-0.367546
	223.5	1.96179	1.98182	1.8417	1.6989	1.73077	1.33012	1.22745	0.96179	0.629313	0.532954	0.17408	0.133801	-0.186698	-0.19202	-0.430047	-0.470984	-0.499037
	223	1.84605	1.87018	1.74133	1.60146	1.616	1.21699	1.08876	0.825378	0.501517	0.414799	0.0409293	-0.010461	-0.333785	-0.328233	-0.588717	-0.613077	-0.648845
	222.5	1.7084	1.73398	1.61923	1.4884	1.47842	1.08815	0.930383	0.668212	0.35447	0.273715	-0.107183	-0.176897	-0.500612	-0.484954	-0.763795	-0.772896	-0.814961
	222	1.54514	1.57992	1.47177	1.35608	1.31711	0.934333	0.751217	0.488829	0.184406	0.108092	-0.27212	-0.366913	-0.685713	-0.664864	-0.959822	-0.953617	-0.998676
	221.5	1.35367	1.40472	1.29585	1.19572	1.12949	0.75578	0.548331	0.284317	-0.0141535	-0.0825995	-0.456281	-0.581746	-0.888592	-0.867124	-1.17866	-1.1588	-1.20235
	221	1.13781	1.20898	1.09349	1.00673	0.915871	0.55394	0.320338	0.0600833	-0.237608	-0.292759	-0.660565	-0.819521	-1.11116	-1.09509	-1.41411	-1.38391	-1.42469
	220.5	0.894923	0.992189	0.862888	0.789615	0.675309	0.326126	0.0663966	-0.185845	-0.48408	-0.526522	-0.884627	-1.07933	-1.351	-1.34718	-1.66633	-1.62709	-1.6669
	220	0.625624	0.746197	0.599184	0.543436	0.406825	0.0728603	-0.209658	-0.457287	-0.753051	-0.781848	-1.12984	-1.35749	-1.61142	-1.62246	-1.93662	-1.88621	-1.92519
	219.5	0.324537	0.469952	0.30647	0.267943	0.10721	-0.210075	-0.511	-0.753223	-1.04661	-1.05954	-1.39718	-1.65505	-1.89237	-1.91936	-2.22747	-2.16669	-2.20108
	219	-0.00913664	0.165091	-0.01759	-0.0356535	-0.220534	-0.519073	-0.837728	-1.07314	-1.35999	-1.35719	-1.68544	-1.97564	-2.19455	-2.23617	-2.53628	-2.46768	-2.49034
	218.5	-0.366671	-0.171098	-0.368579	-0.365481	-0.575422	-0.851335	-1.18718	-1.41204	-1.69348	-1.67335	-1.99225	-2.31663	-2.51577	-2.5667	-2.86387	-2.78158	-2.79496
	218	-0.746107	-0.535148	-0.740832	-0.719852	-0.953408	-1.20229	-1.55329	-1.76593	-2.04618	-2.00795	-2.31434	-2.67166	-2.84909	-2.90963	-3.20257	-3.10618	-3.10955
	217.5	-1.14656	-0.917669	-1.13249	-1.1004	-1.35069	-1.56975	-1.93305	-2.13609	-2.41696	-2.35898	-2.65023	-3.03974	-3.19267	-3.26551	-3.54945	-3.43964	-3.43456
	217	-1.56307	-1.31777	-1.54411	-1.50012	-1.76486	-1.95362	-2.32554	-2.51965	-2.80308	-2.72608	-2.99614	-3.41961	-3.54617	-3.63301	-3.89973	-3.7803	-3.76872
	216.5	-1.98995	-1.73228	-1.97061	-1.91495	-2.19097	-2.35274	-2.72848	-2.91694	-3.20063	-3.10693	-3.35234	-3.80481	-3.9067	-4.00909	-4.25133	-4.12492	-4.1091
	216	-2.42499	-2.15338	-2.41054	-2.34409	-2.62903	-2.76754	-3.13703	-3.32155	-3.60624	-3.49649	-3.71477	-4.19332	-4.26915	-4.38764	-4.60333	-4.47215	-4.45504
	215.5	-2.86507	-2.58226	-2.85739	-2.78331	-3.0757	-3.18704	-3.55163	-3.72728	-4.01237	-3.88993	-4.08194	-4.57819	-4.63062	-4.76337	-4.95254	-4.82095	-4.80219
	215	-3.30713	-3.01529	-3.30518	-3.22695	-3.52539	-3.60767	-3.96897	-4.13217	-4.41279	-4.28248	-4.45008	-4.95897	-4.99017	-5.13312	-5.29578	-5.16685	-5.14656
	214.5	-3.75112	-3.44936	-3.75227	-3.66768	-3.97574	-4.02678	-4.38315	-4.53345	-4.80491	-4.67577	-4.81453	-5.333	-5.3422	-5.49418	-5.63372	-5.50894	-5.48766
	214	-4.19309	-3.88469	-4.19482	-4.10329	-4.42199	-4.44132	-4.78937	-4.93083	-5.18903	-5.06434	-5.17474	-5.69792	-5.68525	-5.84719	-5.96744	-5.84756	-5.81837
	213.5	-4.63204	-4.31569	-4.62776	-4.53192	-4.86052	-4.85355	-5.18795	-5.31753	-5.55994	-5.44422	-5.52561	-6.05575	-6.01694	-6.1912	-6.29289	-6.18191	-6.14049
	213	-5.06205	-4.73612	-5.05038	-4.95029	-5.28927	-5.25664	-5.5773	-5.69475	-5.91757	-5.81427	-5.86532	-6.40505	-6.33786	-6.52362	-6.61062	-6.50745	-6.4507
	212.5	-5.4727	-5.14625	-5.45906	-5.35817	-5.70556	-5.64725	-5.95271	-6.05334	-6.26298	-6.17014	-6.1904	-6.74102	-6.64611	-6.83962	-6.91411	-6.81471	-6.74657
	212	-5.86698	-5.54429	-5.85305	-5.75494	-6.10638	-6.02421	-6.31229	-6.3963	-6.59819	-6.51453	-6.50306	-7.06122	-6.94334	-7.1437	-7.20119	-7.10904	-7.03005
	211.5	-6.24602	-5.92588	-6.23365	-6.14032	-6.49174	-6.38713	-6.65408	-6.72532	-6.92369	-6.84754	-6.80603	-7.36581	-7.23012	-7.43663	-7.47157	-7.38932	-7.30175
	211	-6.60883	-6.29571	-6.60287	-6.51016	-6.86001	-6.73904	-6.98063	-7.04211	-7.23735	-7.16776	-7.09976	-7.65641	-7.51201	-7.71655	-7.72627	-7.65734	-7.56242
	210.5	-6.95316	-6.6496	-6.95748	-6.86348	-7.20628	-7.07874	-7.28968	-7.34542	-7.53629	-7.47166	-7.38354	-7.92767	-7.7791	-7.98036	-7.96337	-7.9051	-7.80741
	210	-7.2762	-6.98062	-7.29171	-7.2013	-7.52805	-7.4015	-7.5773	-7.62775	-7.81478	-7.75049	-7.65138	-8.17476	-8.02534	-8.22062	-8.1803	-8.1257	-8.03187
	209.5	-7.57773	-7.29759	-7.60382	-7.52247	-7.82727	-7.69879	-7.84552	-7.88834	-8.07055	-8.00522	-7.90287	-8.39944	-8.25275	-8.43793	-8.37535	-8.32119	-8.23936
	209	-7.85801	-7.59944	-7.89412	-7.82291	-8.10388	-7.97519	-8.09474	-8.12995	-8.30311	-8.23772	-8.14012	-8.60097	-8.46197	-8.6366	-8.54938	-8.49569	-8.4305
	208.5	-8.11978	-7.8869	-8.16462	-8.10142	-8.35747	-8.23345	-8.32574	-8.35616	-8.51853	-8.45363	-8.36043	-8.78214	-8.64517	-8.81499	-8.70658	-8.63669	-8.60492
	208	-8.36137	-8.15934	-8.41311	-8.35724	-8.585	-8.46989	-8.53678	-8.56287	-8.71524	-8.64953	-8.56217	-8.94214	-8.80133	-8.97119	-8.84535	-8.73757	-8.75835
	207.5	-8.58172	-8.40828	-8.63442	-8.58797	-8.78595	-8.68206	-8.73023	-8.74779	-8.89223	-8.82551	-8.743	-9.08077	-8.93936	-9.09997	-8.94998	-8.79712	-8.89475
	207	-8.77631	-8.63053	-8.83071	-8.79259	-8.95828	-8.86691	-8.89991	-8.91004	-9.0473	-8.97417	-8.9032	-9.20082	-9.05953	-9.20189	-9.03416	-8.81051	-9.01312
	206.5	-8.94127	-8.82302	-8.99761	-8.9639	-9.08255	-9.02316	-9.03435	-9.03159	-9.17981	-9.07145	-9.04252	-9.28969	-9.14447	-9.28128	-9.09638	-8.78317	-9.09771
	206	-9.0806	-8.98338	-9.13657	-9.1038	-9.15411	-9.15297	-9.14209	-9.11843	-9.28748	-9.13152	-9.15392	-9.35336	-9.19097	-9.34154	-9.12109	-8.72214	-9.15254
	205.5	-9.19588	-9.11482	-9.25001	-9.21495	-9.18495	-9.26023	-9.22875	-9.17066	-9.37112	-9.15653	-9.22837	-9.39601	-9.18464	-9.37512	-9.12256	-8.64436	-9.16242
	205	-9.28254	-9.22574	-9.33293	-9.29955	-9.18745	-9.34595	-9.29896	-9.18397	-9.42505	-9.14297	-9.25615	-9.3965	-9.14445	-9.36231	-9.0907	-8.54356	-9.11507
	204.5	-9.33953	-9.31486	-9.39127	-9.35819	-9.15156	-9.40478	-9.35186	-9.16623	-9.45808	-9.09947	-9.23515	-9.34039	-9.06117	-9.27622	-9.01309	-8.39913	-9.02976
	204	-9.37111	-9.37963	-9.42805	-9.36963	-9.09599	-9.42014	-9.38858	-9.11941	-9.46111	-9.02952	-9.16312	-9.22634	-8.93084	-9.11818	-8.89846	-8.20639	-8.91646
	203.5	-9.38286	-9.41994	-9.44341	-9.34791	-9.02456	-9.36841	-9.40875	-9.03605	-9.40941	-8.90384	-9.05056	-9.05784	-8.75942	-8.9253	-8.73692	-7.95389	-8.76957
	203	-9.37798	-9.42941	-9.43736	-9.29678	-8.9215	-9.28209	-9.40164	-8.92014	-9.31753	-8.74034	-8.91603	-8.84772	-8.54914	-8.69369	-8.51383	-7.63712	-8.57259
	202.5	-9.35366	-9.38949	-9.41428	-9.20922	-8.78147	-9.14856	-9.37371	-8.77356	-9.17748	-8.53645	-8.76016	-8.56761	-8.29264	-8.42423	-8.22705	-7.26653	-8.32963
	202	-9.30541	-9.3252	-9.36153	-9.0916	-8.60511	-8.98043	-9.31338	-8.58142	-8.99581	-8.26551	-8.58846	-8.22024	-7.99162	-8.12187	-7.88667	-6.85963	-8.03103
	201.5	-9.20017	-9.2178	-9.28143	-8.96125	-8.39096	-8.76757	-9.21418	-8.34576	-8.77193	-7.95566	-8.38051	-7.8197	-7.6523	-7.79388	-7.50207	-6.47402	-7.67478
	201	-9.05542	-9.07279	-9.17094	-8.82617	-8.17482	-8.52486	-9.06043	-8.08437	-8.54179	-7.58997	-8.13826	-7.4032	-7.29037	-7.46421	-7.10203	-6.10353	-7.28641
	200.5	-8.86613	-8.87386	-9.02749	-8.66499	-7.92518	-8.25325	-8.87756	-7.77995	-8.27761	-7.17563	-7.85587	-6.92179	-6.92339	-7.13509	-6.67387	-5.74759	-6.85337
	200	-8.67377	-8.63695	-8.85216	-8.48013	-7.66226	-7.94068	-8.68776	-7.42647	-7.95543	-6.75664	-7.53612	-6.3885	-6.56281	-6.80571	-6.22092	-5.3782	-6.3786
	199.5	-8.45429	-8.36553	-8.66055	-8.28964	-7.40355	-7.6073	-8.50715	-7.04292	-7.58448	-6.32964	-7.20768	-5.83721	-6.20498	-6.44822	-5.75315	-5.02172	-5.89362
	199	-8.17885	-8.04826	-8.44562	-8.08507	-7.13226	-7.24164	-8.32436	-6.63725	-7.16408	-5.88021	-6.87358	-5.23431	-5.84453	-6.05827	-5.25851	-4.63677	-5.4134
	198.5	-7.88987	-7.68826	-8.20829	-7.84123	-6.81618	-6.83425	-8.10039	-6.19743	-6.70477	-5.41352	-6.53153	-4.6216	-5.46184	-5.66766	-4.71508	-4.19874	-4.94231
	198	-7.58562	-7.29252	-7.95553	-7.54625	-6.51019	-6.40414	-7.83645	-5.73662	-6.22928	-4.96374	-6.17878	-4.04543	-5.10182	-5.30762	-4.16974	-3.75674	-4.49156
	197.5	-7.27759	-6.86487	-7.68828	-7.23978	-6.20243	-5.96683	-7.57493	-5.2881	-5.74457	-4.5225	-5.81611	-3.49993	-4.75517	-5.01893	-3.63244	-3.32615	-4.04719
	197	-6.99446	-6.44022	-7.41246	-6.94727	-5.90795	-5.57065	-7.30731	-4.89029	-5.29005	-4.13015	-5.46116	-3.0004	-4.43927	-4.7702	-3.13249	-2.95952	-3.61143
	196.5	-6.73443	-6.02537	-7.12718	-6.67147	-5.6041	-5.18866	-7.06758	-4.53385	-4.86997	-3.77559	-5.11361	-2.53099	-4.15983	-4.52696	-2.68105	-2.6472	-3.21332
	196	-6.46018	-5.60004	-6.80419	-6.39178	-5.26046	-4.77615	-6.82529	-4.1455	-4.459	-3.41148	-4.75946	-2.09093	-3.88659	-4.26477	-2.27476	-2.36367	-2.82074
	195.5	-6.18506	-5.17386	-6.48036	-6.11123	-4.91877	-4.3628	-6.58242	-3.75779	-4.04722	-3.04653	-4.40483	-1.65003	-3.62325	-4.00451	-1.87137	-2.10189	-2.42878
	195	-5.90986	-4.74759	-6.15643	-5.83059	-4.57845	-3.95112	-6.33945	-3.36999	-3.63535	-2.68148	-4.05194	-1.21188	-3.35994	-3.74995	-1.48499	-1.86544	-2.0368
	194.5	-5.63394	-4.32079	-5.83191	-5.54943	-4.23765	-3.53872	-6.09698	-2.9833	-3.22276	-2.32295	-3.70032	-0.773022	-3.09591	-3.50038	-1.09848	-1.65446	-1.64486
	194	-5.3606	-3.89879	-5.50998	-5.27597	-3.91774	-3.12891	-5.86539	-2.61455	-2.81279	-1.99723	-3.35127	-0.343897	-2.84759	-3.25403	-0.716907	-1.46437	-1.27405
	193.5	-5.0895	-3.47915	-5.19034	-5.0071	-3.6234	-2.72133	-5.63604	-2.25959	-2.40652	-1.68761	-3.00985	0.0812941	-2.61587	-3.01073	-0.354249	-1.29201	-0.915605
	193	-4.821	-3.0613	-4.87449	-4.74295	-3.34759	-2.31552	-5.40916	-1.92309	-2.00292	-1.39289	-2.68699	0.500912	-2.41812	-2.77874	-0.000968561	-1.1224	-0.587643
	192.5	-4.55909	-2.6429	-4.56863	-4.48136	-3.08051	-1.91089	-5.18171	-1.6087	-1.60878	-1.11792	-2.39145	0.893861	-2.23687	-2.5755	0.331792	-0.961086	-0.301869
	192	-4.30699	-2.22503	-4.26466	-4.22557	-2.83352	-1.51326	-4.95504	-1.3065	-1.21629	-0.855733	-2.12771	1.24505	-2.08254	-2.42962	0.629649	-0.830307	-0.0406374
	191.5	-4.06554	-1.81271	-3.96365	-3.99751	-2.59191	-1.13922	-4.73133	-1.01544	-0.837384	-0.604155	-1.89782	1.54829	-1.96083	-2.34473	0.898564	-0.738553	0.205221
	191	-3.83	-1.41042	-3.66699	-3.7835	-2.35417	-0.814454	-4.51367	-0.749051	-0.499222	-0.398862	-1.69543	1.80545	-1.87214	-2.28711	1.12643	-0.699887	0.428065
	190.5	-3.59955	-1.02366	-3.37853	-3.58312	-2.13589	-0.51473	-4.31028	-0.504793	-0.195419	-0.223787	-1.50232	2.026	-1.81579	-2.26235	1.29696	-0.720457	0.610757
	190	-3.3793	-0.670447	-3.09678	-3.40743	-1.94544	-0.25463	-4.118	-0.281883	0.0629544	-0.0831449	-1.32034	2.18046	-1.79835	-2.27172	1.40921	-0.791943	0.75529

## Sheet: Conc Norm
		Native 0.53 mM			2-(R,Z) 0.097 mM			2-(S,Z) 1.5 mM		Native 0.12 mM
	nm	mdeg		nm	mdeg		nm	mdeg		nm	mdeg
	300	0.0735351		300	1.17895		300	0.233148		300	0.327897
	299.5	0.0785199		299.5	1.17969		299.5	0.231442		299.5	0.349171
	299	0.078276		299	1.18041		299	0.232279		299	0.349974
	298.5	0.0780321		298.5	1.18114		298.5	0.233117		298.5	0.351752
	298	0.0777884		298	1.18186		298	0.233954		298	0.347838
	297.5	0.0775445		297.5	1.1826		297.5	0.23479		297.5	0.347615
	297	0.0773006		297	1.18332		297	0.235628		297	0.351991
	296.5	0.0770567		296.5	1.18405		296.5	0.236465		296.5	0.350675
	296	0.0768129		296	1.18477		296	0.237302		296	0.344479
	295.5	0.076569		295.5	1.18551		295.5	0.238139		295.5	0.345419
	295	0.0763251		295	1.18623		295	0.238976		295	0.341556
	294.5	0.0760812		294.5	1.18696		294.5	0.239813		294.5	0.341444
	294	0.0758375		294	1.18768		294	0.24065		294	0.340684
	293.5	0.0755936		293.5	1.18842		293.5	0.241488		293.5	0.336641
	293	0.0753497		293	1.18914		293	0.242325		293	0.341829
	292.5	0.0751058		292.5	1.18987		292.5	0.243162		292.5	0.340137
	292	0.0748621		292	1.19059		292	0.243999		292	0.340205
	291.5	0.0746182		291.5	1.19133		291.5	0.244836		291.5	0.335855
	291	0.0743743		291	1.19205		291	0.245673		291	0.33412
	290.5	0.0741306		290.5	1.19277		290.5	0.24651		290.5	0.334427
	290	0.0738867		290	1.19351		290	0.247348		290	0.328692
	289.5	0.0736428		289.5	1.19423		289.5	0.248184		289.5	0.333675
	289	0.0733989		289	1.19496		289	0.249021		289	0.326769
	288.5	0.0731552		288.5	1.19568		288.5	0.249859		288.5	0.327718
	288	0.0729113		288	1.19642		288	0.250696		288	0.330855
	287.5	0.0726674		287.5	1.19714		287.5	0.251533		287.5	0.324479
	287	0.0724235		287	1.19787		287	0.25237		287	0.326949
	286.5	0.0721797		286.5	1.19859		286.5	0.253207		286.5	0.324624
	286	0.0719358		286	1.19933		286	0.254044		286	0.325419
	285.5	0.0716919		285.5	1.20005		285.5	0.254881		285.5	0.320085
	285	0.071448		285	1.20078		285	0.255719		285	0.31847
	284.5	0.0712043		284.5	1.2015		284.5	0.256556		284.5	0.321231
	284	0.0709604		284	1.20224		284	0.257392		284	0.322308
	283.5	0.0707165		283.5	1.20296		283.5	0.25823		283.5	0.320051
	283	0.0704726		283	1.20369		283	0.259067		283	0.316521
	282.5	0.0702289		282.5	1.20441		282.5	0.259904		282.5	0.318248
	282	0.069985		282	1.20514		282	0.260741		282	0.316821
	281.5	0.0697411		281.5	1.20587		281.5	0.261579		281.5	0.315274
	281	0.0694974		281	1.20659		281	0.262415		281	0.313889
	280.5	0.0692535		280.5	1.20732		280.5	0.263252		280.5	0.313974
	280	0.0690096		280	1.20805		280	0.26409		280	0.313009
	279.5	0.0687657		279.5	1.20878		279.5	0.264927		279.5	0.306137
	279	0.068522		279	1.2095		279	0.265764		279	0.312043
	278.5	0.068278		278.5	1.21023		278.5	0.266601		278.5	0.307923
	278	0.0680341		278	1.21096		278	0.267438		278	0.301709
	277.5	0.0677902		277.5	1.21169		277.5	0.268275		277.5	0.305983
	277	0.0675465		277	1.21241		277	0.269112		277	0.303427
	276.5	0.0673026		276.5	1.21315		276.5	0.26995		276.5	0.298487
	276	0.0670587		276	1.21387		276	0.270787		276	0.299282
	275.5	0.0668148		275.5	1.2146		275.5	0.271623		275.5	0.297991
	275	0.0665711		275	1.21532		275	0.272461		275	0.295068
	274.5	0.0663272		274.5	1.21606		274.5	0.273298		274.5	0.295821
	274	0.0660833		274	1.21678		274	0.274135		274	0.296692
	273.5	0.0658394		273.5	1.21751		273.5	0.274972		273.5	0.291701
	273	0.0655957		273	1.21823		273	0.275809		273	0.293026
	272.5	0.0653518		272.5	1.21896		272.5	0.276646		272.5	0.292821
	272	0.0651079		272	1.21969		272	0.277483		272	0.294453
	271.5	0.064864		271.5	1.22041		271.5	0.278321		271.5	0.294231
	271	0.0646203		271	1.22114		271	0.279158		271	0.286162
	270.5	0.0643764		270.5	1.22187		270.5	0.279995		270.5	0.288205
	270	0.0641325		270	1.2226		270	0.280832		270	0.286889
	269.5	0.0638887		269.5	1.22332		269.5	0.281669		269.5	0.287615
	269	0.0636448		269	1.22405		269	0.282506		269	0.285462
	268.5	0.0634009		268.5	1.22478		268.5	0.283343		268.5	0.283103
	268	0.063157		268	1.22551		268	0.284181		268	0.281991
	267.5	0.0629133		267.5	1.22623		267.5	0.285017		267.5	0.278709
	267	0.0626694		267	1.22696		267	0.285854		267	0.278179
	266.5	0.0624255		266.5	1.22769		266.5	0.286692		266.5	0.280479
	266	0.0621816		266	1.22842		266	0.287529		266	0.275299
	265.5	0.0619379		265.5	1.22914		265.5	0.288366		265.5	0.274726
	265	0.061694		265	1.22987		265	0.289203		265	0.27665
	264.5	0.0614501		264.5	1.2306		264.5	0.29004		264.5	0.275043
	264	0.0612062		264	1.23133		264	0.290877		264	0.276
	263.5	0.0609625		263.5	1.23205		263.5	0.291714		263.5	0.27241
	263	0.0607186		263	1.23278		263	0.292552		263	0.270179
	262.5	0.0604747		262.5	1.23351		262.5	0.293389		262.5	0.268205
	262	0.060231		262	1.23423		262	0.294226		262	0.267538
	261.5	0.0599871		261.5	1.23496		261.5	0.295063		261.5	0.268641
	261	0.0597432		261	1.23569		261	0.2959		261	0.26441
	260.5	0.0594992		260.5	1.23642		260.5	0.296737		260.5	0.262778
	260	0.0592555		260	1.23714		260	0.297574		260	0.264068
	259.5	0.0590116		259.5	1.23787		259.5	0.298411		259.5	0.267504
	259	0.0587677		259	1.2386		259	0.299248		259	0.266179
	258.5	0.0585238		258.5	1.23933		258.5	0.300086		258.5	0.262402
	258	0.0582801		258	1.24005		258	0.300923		258	0.262838
	257.5	0.0580362		257.5	1.24078		257.5	0.30176		257.5	0.26394
	257	0.0577923		257	1.24151		257	0.302597		257	0.263179
	256.5	0.0575484		256.5	1.24224		256.5	0.303434		256.5	0.260966
	256	0.0573047		256	1.24296		256	0.304271		256	0.259222
	255.5	0.0570608		255.5	1.24369		255.5	0.305108		255.5	0.25306
	255	0.0568169		255	1.24442		255	0.305946		255	0.252231
	254.5	0.056573		254.5	1.24514		254.5	0.306783		254.5	0.257299
	254	0.0563293		254	1.24587		254	0.307619		254	0.253624
	253.5	0.0560854		253.5	1.24659		253.5	0.308457		253.5	0.251026
	253	0.0558415		253	1.24733		253	0.309294		253	0.246761
	252.5	0.0555976		252.5	1.24805		252.5	0.310131		252.5	0.245829
	252	0.0553538		252	1.24878		252	0.310968		252	0.251863
	251.5	0.0551099		251.5	1.2495		251.5	0.311806		251.5	0.249188
	251	0.054866		251	1.25024		251	0.312642		251	0.248197
	250.5	0.0546223		250.5	1.25096		250.5	0.313479		250.5	0.243641
	250	0.0543784		250	1.25169		250	0.314317		250	0.246043
	249.5	0.0541345		249.5	1.25242		249.5	0.315154		249.5	0.240427
	249	0.0538906		249	1.25315		249	0.315991		249	0.244145
	248.5	0.0536469		248.5	1.25387		248.5	0.316828		248.5	0.238256
	248	0.053403		248	1.2546		248	0.317665		248	0.23647
	247.5	0.0531591		247.5	1.25533		247.5	0.318502		247.5	0.235701
	247	0.0529152		247	1.25606		247	0.319339		247	0.23541
	246.5	0.0526715		246.5	1.25678		246.5	0.320177		246.5	0.23159
	246	0.0524276		246	1.25751		246	0.321014		246	0.234855
	245.5	0.0521837		245.5	1.25824		245.5	0.32185		245.5	0.233778
	245	0.0519398		245	1.25896		245	0.322688		245	0.236607
	244.5	0.0516961		244.5	1.25969		244.5	0.323525		244.5	0.235248
	244	0.0514522		244	1.26041		244	0.324362		244	0.230171
	243.5	0.0512083		243.5	1.26115		243.5	0.3291		243.5	0.231513
	243	0.0509644		243	1.26187		243	0.333486		243	0.22512
	242.5	0.0507206		242.5	1.2626		242.5	0.339812		242.5	0.223231
	242	0.0504767		242	1.26332		242	0.347661		242	0.227598
	241.5	0.0502328		241.5	1.26406		241.5	0.358091		241.5	0.223667
	241	0.0918732		241	1.26478		241	0.370045		241	0.413513
	240.5	0.140658		240.5	1.26551		240.5	0.383024		240.5	0.635376
	240	0.197471		240	1.26623		240	0.398142		240	0.897897
	239.5	0.263017		239.5	1.26697		239.5	0.414403		239.5	1.18966
	239	0.338422		239	1.39421		239	0.43217		239	1.53383
	238.5	0.423559		238.5	1.53167		238.5	0.451757		238.5	1.92656
	238	0.520392		238	1.70375		238	0.47413		238	2.36359
	237.5	0.629469		237.5	1.8921		237.5	0.499672		237.5	2.86495
	237	0.755531		237	2.11453		237	0.529254		237	3.43651
	236.5	0.893841		236.5	2.36641		236.5	0.562157		236.5	4.06641
	236	1.0449		236	2.65199		236	0.597279		236	4.75182
	235.5	1.21014		235.5	2.96438		235.5	0.635214		235.5	5.51279
	235	1.38546		235	3.28953		235	0.675492		235	6.31144
	234.5	1.57372		234.5	3.65171		234.5	0.720752		234.5	7.16897
	234	1.77544		234	4.07724		234	0.770262		234	8.08371
	233.5	1.98844		233.5	4.54405		233.5	0.821559		233.5	9.05603
	233	2.21467		233	5.05446		233	0.876559		233	10.0879
	232.5	2.45077		232.5	5.59569		232.5	0.934207		232.5	11.1572
	232	2.69214		232	6.16481		232	0.995131		232	12.2631
	231.5	2.9385		231.5	6.74238		231.5	1.05985		231.5	13.3829
	231	3.18826		231	7.34811		231	1.12499		231	14.5176
	230.5	3.43874		230.5	7.98297		230.5	1.18981		230.5	15.659
	230	3.68445		230	8.6282		230	1.25214		230	16.7766
	229.5	3.92099		229.5	9.26301		229.5	1.31004		229.5	17.8568
	229	4.14278		229	9.85278		229	1.36242		229	18.8717
	228.5	4.35103		228.5	10.4076		228.5	1.40894		228.5	19.8181
	228	4.53899		228	10.9324		228	1.44884		228	20.6769
	227.5	4.70096		227.5	11.3771		227.5	1.4814		227.5	21.4092
	227	4.83313		227	11.7457		227	1.5076		227	22.0102
	226.5	4.93332		226.5	12.0108		226.5	1.5244		226.5	22.4731
	226	4.99869		226	12.1625		226	1.5314		226	22.7715
	225.5	5.02173		225.5	12.1991		225.5	1.52597		225.5	22.876
	225	5.00486		225	12.1433		225	1.50423		225	22.7965
	224.5	4.93929		224.5	11.9634		224.5	1.46774		224.5	22.4986
	224	4.82463		224	11.681		224	1.41796		224	21.9761
	223.5	4.65295		223.5	11.2667		223.5	1.35296		223.5	21.1898
	223	4.426		223	10.7053		223	1.27314		223	20.1611
	222.5	4.14364		222.5	9.9976		222.5	1.17821		222.5	18.8734
	222	3.79542		222	9.1467		222	1.06561		222	17.2862
	221.5	3.37638		221.5	8.1066		221.5	0.933566		221.5	15.3738
	221	2.88972		221	6.91551		221	0.784697		221	13.1633
	220.5	2.33544		220.5	5.55207		220.5	0.617188		220.5	10.6334
	220	1.71695		220	4.02739		220	0.431465		220	7.8157
	219.5	1.03544		219.5	2.33115		219.5	0.223819		219.5	4.7129
	219	0.296782		219	0.435102		219	-0.00630113		219	1.34916
	218.5	-0.493662		218.5	-1.65073		218.5	-0.252877		218.5	-2.25562
	218	-1.32844		218	-3.9057		218	-0.514557		218	-6.05374
	217.5	-2.20193		217.5	-6.34902		217.5	-0.790731		217.5	-10.0372
	217	-3.10542		217	-9.00198		217	-1.07798		217	-14.1514
	216.5	-4.02921		216.5	-11.8069		216.5	-1.37238		216.5	-18.3606
	216	-4.97178		216	-14.7915		216	-1.67241		216	-22.656
	215.5	-5.91462		215.5	-17.9442		215.5	-1.97591		215.5	-26.9472
	215	-6.84687		215	-21.2353		215	-2.28078		215	-31.1942
	214.5	-7.76238		214.5	-24.6537		214.5	-2.58698		214.5	-35.367
	214	-8.656		214	-28.1741		214	-2.89179		214	-39.4331
	213.5	-9.52655		213.5	-31.7751		213.5	-3.19451		213.5	-43.4005
	213	-10.3676		213	-35.4676		213	-3.49107		213	-47.2314
	212.5	-11.1764		212.5	-39.1751		212.5	-3.77428		212.5	-50.9222
	212	-11.948		212	-42.8915		212	-4.04619		212	-54.4333
	211.5	-12.6824		211.5	-46.6502		211.5	-4.3076		211.5	-57.7826
	211	-13.378		211	-50.4477		211	-4.55781		211	-60.9495
	210.5	-14.0317		210.5	-54.2058		210.5	-4.79528		210.5	-63.923
	210	-14.6364		210	-57.8848		210	-5.01807		210	-66.6823
	209.5	-15.1856		209.5	-61.4771		209.5	-5.22602		209.5	-69.1832
	209	-15.6819		209	-64.9598		209	-5.41932		209	-71.4439
	208.5	-16.1286		208.5	-68.3655		208.5	-5.59985		208.5	-73.4764
	208	-16.5227		208	-71.6382		208	-5.76646		208	-75.2785
	207.5	-16.8635		207.5	-74.7612		207.5	-5.91843		207.5	-76.825
	207	-17.1511		207	-77.7282		207	-6.05263		207	-78.1389
	206.5	-17.3864		206.5	-80.4875		206.5	-6.16639		206.5	-79.2119
	206	-17.5714		206	-83.0545		206	-6.26248		206	-80.0505
	205.5	-17.7126		205.5	-85.4623		205.5	-6.34199		205.5	-80.6967
	205	-17.8173		205	-87.6803		205	-6.40175		205	-81.174
	204.5	-17.8884		204.5	-89.6843		204.5	-6.44106		204.5	-81.4926
	204	-17.927		204	-91.4713		204	-6.46283		204	-81.6704
	203.5	-17.934		203.5	-93.0151		203.5	-6.47094		203.5	-81.7011
	203	-17.9177		203	-94.2481		203	-6.46757		203	-81.6275
	202.5	-17.881		202.5	-95.05		202.5	-6.4508		202.5	-81.4602
	202	-17.8195		202	-95.3089		202	-6.41752		202	-81.1807
	201.5	-17.7033		201.5	-95.1663		201.5	-6.34494		201.5	-80.6503
	201	-17.5292		201	-94.6821		201	-6.24512		201	-79.8582
	200.5	-17.3024		200.5	-93.7319		200.5	-6.11457		200.5	-78.8244
	200	-17.0126		200	-92.5239		200	-5.98191		200	-77.5095
	199.5	-16.6812		199.5	-91.229		199.5	-5.83054		199.5	-75.9958
	199	-16.2975		199	-89.6602		199	-5.64059		199	-74.251
	198.5	-15.8491		198.5	-87.763		198.5	-5.44129		198.5	-72.2028
	198	-15.3348		198	-85.3744		198	-5.23146		198	-69.8613
	197.5	-14.7902		197.5	-82.8106		197.5	-5.01903		197.5	-67.3791
	197	-14.248		197	-80.124		197	-4.82377		197	-64.9114
	196.5	-13.6998		196.5	-77.3546		196.5	-4.64443		196.5	-62.4123
	196	-13.1135		196	-74.3202		196	-4.4553		196	-59.7459
	195.5	-12.5256		195.5	-71.2892		195.5	-4.26556		195.5	-57.0671
	195	-11.9375		195	-68.2852		195	-4.07577		195	-54.3878
	194.5	-11.3481		194.5	-65.3024		194.5	-3.88548		194.5	-51.7005
	194	-10.7635		194	-62.3463		194	-3.69697		194	-49.0414
	193.5	-10.1831		193.5	-59.4095		193.5	-3.51		193.5	-46.395
	193	-9.60598		193	-56.48		193	-3.32483		193	-43.7669
	192.5	-9.0278		192.5	-53.5639		192.5	-3.1442		192.5	-41.1284
	192	-8.4506		192	-50.652		192	-2.97034		192	-38.5014
	191.5	-7.87899		191.5	-47.7841		191.5	-2.80382		191.5	-35.8986
	191	-7.31306		191	-44.9577		191	-2.64138		191	-33.3185
	190.5	-6.75546		190.5	-42.2557		190.5	-2.48245		190.5	-30.7761
	190	-6.21004		190	-39.7942		190	-2.33055		190	-28.2944
